# Supplementary material for: A versatile catalyst system for enantioselective synthesis of 2-substituted 1,4-benzodioxanes
Source: PubMed Central journal article supplement — Chem Sci. 2019 Mar 13;10(15):4339–45. doi: 10.1039/c8sc05612a (PMC6472100; doi:10.1039/c8sc05612a), 2019-03-13
Supplement: SC-010-C8SC05612A-s001.pdf [file SC-010-C8SC05612A-s001.pdf]

**Supporting Information for:**

**A Versatile Catalyst System for Enantioselective Synthesis of  
2-Substituted 1,4-Benzodioxanes**

Eugene Chong,<sup>\*a</sup> Bo Qu,<sup>\*a</sup> Yongda Zhang,<sup>\*a</sup> Zachary P. Cannone,<sup>a</sup> Joyce C. Leung,<sup>a</sup>  
Sergei Tcyrulnikov,<sup>b</sup> Khoa D. Nguyen,<sup>a</sup> Nizar Haddad,<sup>a</sup> Soumik Biswas,<sup>a</sup> Xiaowen Hou,<sup>a</sup> Katarzyna  
Kaczanowska,<sup>c</sup> Michał Chwalba,<sup>c</sup> Andrzej Tracz,<sup>c</sup> Stefan Czarnocki,<sup>c</sup> Jinhua J. Song,<sup>a</sup> Marisa C.  
Kozłowski<sup>\*b</sup> and Chris H. Senanayake<sup>a,d</sup>

<sup>a</sup>Chemical Development US, Boehringer Ingelheim Pharmaceuticals, Inc. 900 Ridgebury Road, Ridgefield, CT 06877, USA

<sup>b</sup>Department of Chemistry, University of Pennsylvania, Philadelphia, PA 19104, USA

<sup>c</sup>Aperion Synthesis S. A. Wrocław Technology Park ul. Duńska 9, 54-427 Wrocław, Poland

<sup>d</sup>Astatech BioPharmaceutical Corporation, 488 Kelin West Road, Wenjiang Dist., Chengdu, Sichuan 611130, P. R. China

**Table of Contents**

|                                                                                       |           |
|---------------------------------------------------------------------------------------|-----------|
| I. General Information                                                                | S2        |
| II. Synthesis of 1,4-Benzodioxines <b>4a</b> and <b>4b</b> Using Nitro-Grela Catalyst | S3–S6     |
| III. Synthesis of Substrates <b>5a–5ae</b>                                            | S6–S23    |
| IV. Ligand Screening and Synthesis of <b>6a</b>                                       | S24–S26   |
| V. Synthesis of <b>6b–6ae</b> Using Asymmetric Hydrogenation                          | S26–S48   |
| VI. NMR Spectra                                                                       | S49–S130  |
| VII. Chiral HPLC/SFC Data                                                             | S131–S161 |
| VIII. DFT Calculation Data                                                            | S162–S184 |

## I. General Information

### General:

Unless stated otherwise, reactions were conducted under an atmosphere of nitrogen using standard Schlenk or glove box techniques. NMR Spectra ( $^1\text{H}$ ,  $^{13}\text{C}$ ,  $^{19}\text{F}$ ) were recorded on Bruker DPX-400, Bruker DRX-500, or Bruker AVANCE 600 NMR spectrometer. All  $^{13}\text{C}$  NMR data presented are proton-decoupled  $^{13}\text{C}$  NMR spectra, unless noted otherwise. Chemical shifts ( $\delta$ ) are reported in parts per million (ppm) and coupling constants ( $J$ ) are given in Hertz (Hz) and referenced relative to TMS (0 ppm). The following abbreviations are used to indicate signal multiplicity: s = singlet, d = doublet, t = triplet, q = quartet, p = pentet, dd = doublet of doublets, dq = doublet of quartets, td = triplet of doublets, qd = quartet of doublets, ddt = doublet of doublet of triplets, m = multiplet, app = apparent, and br = broad resonance. High-resolution mass spectrometry (HRMS) data were obtained on Thermo LTQ FT Ultra mass spectrometer at 100,000 resolving power using direct analysis in real time (DART) source ionization or Thermo Scientific Exactive mass spectrometer at 120,000 resolving power using Heated Electrospray Source Ionization (HESI) in the positive ion mode. Flash chromatography was performed using a Teledyne CombiFlash Rf (visualizing at 254 & 280 nm) with Silicycle SiliaSep Flash Cartridges (60Å porosity, 40-63  $\mu\text{m}$ ). Chiral SFC and HPLC analyses were conducted on Agilent 1260 Infinity system. Specific rotation was measured on Rudolph Research Analytical Autopol III S2 polarimeter.

The absolute configuration of product **6f**<sup>1</sup> and **6z**<sup>2</sup> were determined by comparison of analytical data with the literature. The absolute configurations of other compounds were assigned by analogy.

All commercial reagents were used as received. All anhydrous solvents were purchased from Sigma Aldrich in a Sure-Seal bottle and degassed by sparging with nitrogen for 15 min before use.  $[\text{RuCl}(\text{H}(\text{CO})(\text{PPh}_3)_3)]$ , nitro-Grela AS2032, and SnatchCat AS1033 were synthesized in house by Aperion Synthesis.  $[\text{Ir}(\text{cod})\text{Cl}]_2$  was purchased from Strem. Compounds **5f**,<sup>1</sup> **5h**,<sup>1</sup> **5z**,<sup>2</sup> **L1-L5**<sup>3</sup> are known compounds and were prepared according to reported procedures.

---

<sup>1</sup> Wang, Y.; Xia, J.; Yang, G.; Zhang, W. *Tetrahedron* **2018**, *74*, 477.

<sup>2</sup> Yin, X.; Huang, Y.; Chen, Z.; Hu, Y.; Tao, L.; Zhao, Q.; Dong, X.-Q.; Zhang, X. *Org. Lett.* **2018**, *20*, 4173.

<sup>3</sup> (a) Luo, R. S.; Li, K.; Hu, Y.; Tang, W. *Adv. Synth. Catal.* **2013**, *355*, 1297. (b) Liu, G.; Liu, X.; Cai, Z.; Jiao, G.; Xu, G.; Tang, W. *Angew. Chem., Int. Ed.* **2013**, *52*, 4235. (c) Huang, L.; Zhu, J.; Jiao, G.; Wang, Z.; Yu, X.; Deng, W.-P.; Tang, W. *Angew. Chem., Int. Ed.* **2016**, *55*, 4527.

## II. Synthesis of 1,4-Benzodioxines 4a and 4b Using Nitro-Grela Catalyst

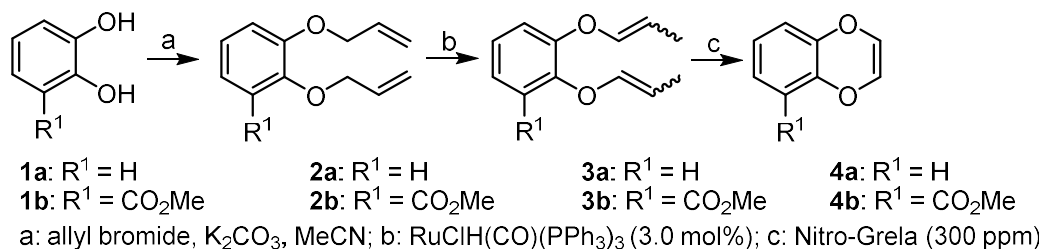

Alkylation of catechols **1** with allyl bromide afforded bis(allyloxy)benzoates **2**, which were then catalytically isomerized to obtain bis(prop-1-en-1-yloxy)benzenes **3** as a mixture of E/Z isomers. In the final step, **3** gave ring closing metathesis product **4** catalyzed by nitro-Grela catalyst.

### 1,2-Bis(allyloxy)benzene (2a)

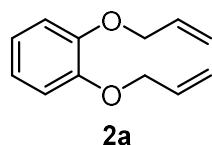

1,2-Dihydroxybenzene (31.6 g, 287 mmol) was dissolved in DMF (270 mL) in 500 mL round-bottom flask equipped with reflux condenser. Flask was placed in water bath (reaction is exothermic) and sodium iodide (4.30 g, 29 mmol), allyl bromide (62.0 mL, 717 mmol) followed by potassium carbonate (119.0 g, 861 mmol) were added. The mixture was stirred at room temperature for 2 h. Acetonitrile (270 mL) was added and solids were filtered off. The mixture was concentrated in vacuo and the product (colorless oil, 45.5 g, 83% yield, 97% GC purity) was isolated by vacuum distillation (100 °C, 0.001 mbar). NMR spectral data match literature data.<sup>4</sup>

<sup>1</sup>H NMR (601 MHz, CDCl<sub>3</sub>) δ 6.93–6.86 (m, 4H), 6.08 (ddt, *J* = 17.3, 10.5, 5.3 Hz, 2H), 5.41 (dq, *J* = 17.3, 1.6 Hz, 2H), 5.26 (dq, *J* = 10.5, 1.4 Hz, 2H), 4.60 (dt, *J* = 5.3, 1.6 Hz, 4H).

<sup>13</sup>C NMR (151 MHz, CDCl<sub>3</sub>) δ 148.6, 133.5, 121.2, 117.4, 114.3, 69.9.

### Methyl 2,3-bis(allyloxy)benzoate (2b)

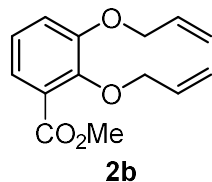

Methyl 2,3-dihydroxybenzoate (20.0 g, 120 mmol) was dissolved in acetonitrile (80 mL), allyl bromide (26.0 mL, 300 mmol, 2.5 eq) followed by potassium carbonate (49.9 g, 360 mmol, 3.0 eq) were added

<sup>4</sup> Morgans, G. L.; Ngidi, E. L.; Madeley, L. G.; Khanye, S. D.; Michael, J. P.; de Koning, C. B.; van Otterlo, W. A. L. *Tetrahedron* **2009**, *65*, 10650.

and the mixture was stirred at 80 °C for 1 h. The solids were filtered off, the mixture concentrated in vacuo and the product (pale yellow oil, 29.6 g, 94% yield, 98% GC purity) was isolated by vacuum distillation (140 °C, 0.0043 mbar). NMR spectral data match literature data.<sup>5</sup>

<sup>1</sup>H NMR (500 MHz, CDCl<sub>3</sub>) δ 7.34–7.31 (m, 1H), 7.05–7.04 (m, 2H), 6.17–6.02 (m, 2H), 5.45–5.40 (m, 1H), 5.39–5.34 (m, 1H), 5.30–5.27 (m, 1H), 5.24–5.20 (m, 1H), 4.60–4.57 (m, 4H), 3.88 (s, 3H).

<sup>13</sup>C NMR (126 MHz, CDCl<sub>3</sub>) δ 166.9, 152.7, 148.4, 134.4, 133.2, 126.8, 123.9, 122.7, 118.0, 117.7, 117.7, 74.9, 70.1, 52.3.

### 1,2-Bis(1-propenyloxy)benzene (3a)

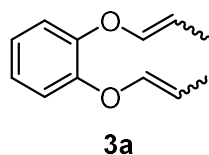

A mixture of methyl 1,2-bis(allyloxy)benzene (12.4 g, 65 mmol) in toluene (65 mL) was purged with argon. The mixture was equilibrated at 80 °C for 30 minutes. [RuClH(CO)(PPh<sub>3</sub>)<sub>3</sub>] (0.621 g, 1.0 mol%) was then added in one portion, a reflux condenser was mounted and the reaction mixture was stirred at 80 °C for 7 h. The mixture was allowed to cool to rt, copper chloride was added (0.29 g, 4.5 mol%) and the mixture was stirred at rt for 30 min. The suspension was filtered via an aluminum oxide pad, the solvents were removed in vacuo and the product (colorless oil, 10.5 g, 85% yield, >99% GC purity) was isolated by vacuum distillation (75–95 °C, 0.001 mbar). NMR spectral data match

literature data.<sup>4</sup>

<sup>1</sup>H NMR (601 MHz, CDCl<sub>3</sub>): δ 7.05–6.94 (m, 4H), 6.44–6.27 (m, 2H), 5.41–5.28 (m, 0.4H), 4.94–4.82 (m, 1.5H), 1.81–1.69 (m, 4.7H), 1.69–1.61 (s, 1.4H).

<sup>13</sup>C NMR (151 MHz, CDCl<sub>3</sub>): δ 147.8, 147.7, 143.1, 141.9, 141.6, 123.4, 123.2, 123.2, 123.1, 118.1, 117.6, 117.4, 117.2, 108.1, 107.8, 107.6, 107.3, 77.2, 12.3, 9.6, 9.5.

### Methyl 2,3-bis(1-propenyloxy)benzoate (3b)

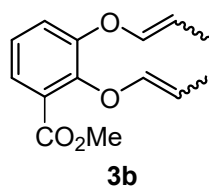

A mixture of methyl 2,3-bis(allyloxy)benzoate (14.9 g, 60 mmol) in toluene (16 mL) was degassed and purged with argon. The mixture was equilibrated at 60 °C for 30 minutes. [RuClH(CO)(PPh<sub>3</sub>)<sub>3</sub>] (1.72 g, 3 mol%) was then added in one portion, a reflux condenser was mounted and the reaction mixture was

<sup>5</sup> Aristegui, S. R.; El-Murr, M. D.; Golding, B. T.; Griffin, R. J.; Hardcastle, I. R. *Org. Lett.* **2006**, *8*, 5927.



stirred at 60 °C for 20 h followed by 3 h at 130 °C. The mixture was allowed to cool to rt, copper chloride was added (0.54 g, 9 mol%) and the mixture was stirred at rt for 30 min. The suspension was filtered via an aluminum oxide pad, the solvents were removed in vacuo and the product (colorless oil, 13.0 g, 87% yield, 97% GC purity) was isolated by vacuum distillation (135-150 °C, 0.25 mbar).

**<sup>1</sup>H NMR** (601 MHz, CDCl<sub>3</sub>): δ 7.47–7.44 (m, 1H), 7.18–7.15 (m, 1H), 7.12–7.09 (m, 1H), 6.34 (dq, *J* = 12.0, 1.2 Hz, 0.2H), 6.31 (dq, *J* = 6.0, 1.8 Hz, 0.8H), 6.18 (dq, *J* = 6.0, 1.8 Hz, 0.7H), 6.14 (dq, *J* = 6.0, 1.2 Hz, 0.2H), 5.33 (dq, *J* = 12.0, 7.2 Hz, 0.2H), 4.90 (dq, *J* = 6.6, 6.0 Hz, 0.8H), 4.68–4.63 (m, 0.9H), 3.89 (s, 2.4H), 3.88 (s, 0.6H), 1.77 (dd, *J* = 7.2, 1.8 Hz, 2.6H), 1.75 (d, *J* = 1.8 Hz, 0.3H), 1.71 (dd, *J* = 6.6, 1.8 Hz, 2.4H), 1.64–1.63 (m, 0.7H).

**<sup>13</sup>C NMR** (151 MHz, CDCl<sub>3</sub>): δ 166.4, 150.6, 150.3, 146.9, 145.0, 144.9, 142.5, 141.1, 126.2, 126.1, 124.9, 124.5, 124.5, 124.5, 121.6, 120.4, 108.6, 108.3, 103.6, 103.5, 52.4, 12.3, 9.5, 9.3.

#### 1,4-Benzodioxine (4a)

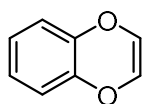

4a

A dry three-neck round-bottom flask equipped in a reflux condenser, flushed with argon, was charged with a solution of 1,2-bis(1-propenyloxy)benzene (77.2 g, 406 mmol) in toluene 406 mL) and the solution was equilibrated at 70 °C for 30 min with a steady argon flow through the mixture. A solution of nitro-Grela AS2032 catalyst (0.041 g, 0.061 mmol, 150 ppm) in toluene (3 mL), was added in 5 portions in 15 min increments (90% of product was observed by GC after second 30 ppm portion). The mixture was stirred at 70 °C for additional 1 h under steady flow of argon. Next the mixture was cooled to rt, 0.1 M dichloromethane solution of SnatchCat AS1033 (3.65 mL, 0.365 mmol) was added and stirring continued for 20 minutes at rt. Silica gel (8.2 g) was added and the suspension was stirred for 30 minutes at rt. The solids were removed by filtration through a silica gel pad (8.2 g), which was then washed with cyclohexane (150 mL). The crude mixture was concentrated in vacuo and the product (colorless oil, 44.0 g, 81% yield, >99% GC purity) was isolated by vacuum distillation (75-80 °C, 0.001 mbar). NMR spectral data match literature data.<sup>4</sup>

**<sup>1</sup>H NMR** (601 MHz, CDCl<sub>3</sub>): δ 6.85–6.75 (m, 2H), 6.66–6.57 (m, 2H), 5.86 (s, 2H).

**<sup>13</sup>C NMR** (151 MHz, CDCl<sub>3</sub>): δ 142.9, 126.9, 124.3, 116.4, 77.2.

#### Methyl 1,4-benzodioxine-5-carboxylate (4b)

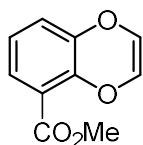

4b

A dry three-neck round-bottom flask equipped in a reflux condenser flushed with argon was charged with a solution of methyl 2,3-bis(1-propenyloxy)benzoate (6.79 g, 27.3 mmol) in toluene (12 mL) and the solution was equilibrated at 70 °C for 30 min with a steady argon flow through the mixture. nitro-Grela AS2032 catalyst (0.030 g, 0.045 mmol) was dissolved in toluene (14.8 mL) in a separate dry and argon flushed flask. Argon flow through the mixture was increased, the catalyst solution was added to the substrate mixture with a syringe pump (300 ppm, 2.7 mL, 30 uL/min) over 90 min and the mixture was stirred at 70 °C for additional 30 min. After the mixture reached rt, dichloromethane solution of SnachCat AS1033 (0.03 mmol, 0.25 mL, 0.1 M) was added and stirring continued for 20 minutes at rt. Silica gel (1.6 g) was added and the suspension was stirred for 30 minutes at rt. The solids were removed by filtration through a silica gel pad (3.2 g), which was then rinsed with *tert*-butyl methyl ether (20 mL). The crude mixture was concentrated in vacuo and the product (colorless oil, 4.5 g, 87% yield, 97.6% GC purity) was isolated by vacuum distillation (124 °C, 0.005 mbar). The product solidified when stored at 4 °C. The solid was recrystallized from diethyl ether/pentane/cyclohexane (99% GC purity).

<sup>1</sup>H NMR (601 MHz, CDCl<sub>3</sub>): δ 7.32 (dd, *J* = 8.0, 1.5 Hz, 1H), 6.82 (t, *J* = 8.0 Hz, 1H), 6.74 (dd, *J* = 8.0, 1.5 Hz, 1H), 5.98 (d, *J* = 3.6 Hz, 1H), 5.91 (d, *J* = 3.6 Hz, 1H), 3.86 (s, 3H).

<sup>13</sup>C NMR (151 MHz, CDCl<sub>3</sub>): δ 165.1, 143.3, 143.2, 127.2, 126.9, 126.0, 123.2, 120.0, 119.2, 52.2.

HRMS (HESI): *m/z* calcd for C<sub>10</sub>H<sub>9</sub>O<sub>4</sub> [M+H]<sup>+</sup>: 193.04954. Found: 193.04952.

### III. Synthesis of Substrates 5a–5ae

#### Preparation of 2-bromo-1,4-benzodioxine derivatives

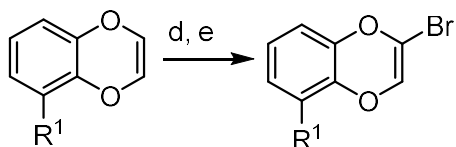

**4a:** R<sup>1</sup> = H

**4b:** R<sup>1</sup> = CO<sub>2</sub>Me

**SI-1:** R<sup>1</sup> = H

**SI-2:** R<sup>1</sup> = CO<sub>2</sub>Me

d: NBS; e: base

#### 2-bromo-1,4-benzodioxine (SI-1)

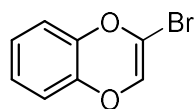

SI-1

A flask was charged 1,4-benzodioxine (6.96 g, 51.9 mmol, 1 equiv), LiBr (6.76 g, 86.8 mmol, 1.5 equiv) and CH<sub>3</sub>CN (30 mL). A solution of N-Bromosuccinimide (9.70 g, 54.5 mmol, 1.05 equiv) in CH<sub>3</sub>CN (70 mL) was added to the flask while maintaining the internal temperature at 20-25 °C. After 15 min, 5% sodium hydrogen sulfite in 8 mL of water was added. Acetonitrile was removed in vacuo. Water (100 mL)

was added to the crude residue and extracted three times with MTBE (3 × 150 mL). Combined organic extracts were dried over MgSO<sub>4</sub>, filtered through a short pad of silica gel, and concentrated in vacuo. The resulting light brown solid was stirred in toluene (45 mL), and the resulting slurry was added to a stirred slurry of NaOtBu (15.0 g, 156 mmol, 3 equiv) in *t*BuOH (150 mL) at rt. After 1 h, water (100 mL) was added and extracted with CH<sub>2</sub>Cl<sub>2</sub> (3 × 100 mL). Combined organic extracts were dried over MgSO<sub>4</sub>, filtered, and concentrated in vacuo. The product was purified by column chromatography (100% hexanes) to yield a colorless oil (6.70 g, 61% yield). NMR spectral data match literature data.<sup>6</sup>

<sup>1</sup>H NMR (400 MHz, CDCl<sub>3</sub>): δ 6.93–6.85 (multiple peaks, 2H), 6.75–6.65 (multiple peaks, 2H), 6.03 (s, 1H).

### methyl 2-bromo-1,4-benzodioxine-5-carboxylate (SI-2)

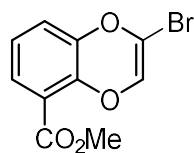

SI-2

SI-2 was prepared in a related procedure to the synthesis of SI-1. After the NBS step d, methyl 2,3-dibromo-2,3-dihydro-1,4-benzodioxine-5-carboxylate (22.5 g, 63.9 mmol, 1 equiv) and MeOH (200 mL) were charged into a flask and placed in a pre-heated oil bath at 75 °C. NaOMe (0.5 M in MeOH, 511 mL, 256 mmol, 4 equiv) was added. After 90 minutes at 75 °C, the reaction mixture was cooled to room temperature and then treated with 90 g of silica. The solvent was evaporated and the dry silica is split in two portions for purification. Each portion was purified by Isolera (340g KP-Sil Biotage column, 0–15% EtOAc/Heptane). A total of 6.20 g of the desired product was obtained with 36 % yield.

<sup>1</sup>H NMR (500 MHz, CDCl<sub>3</sub>): δ 7.44 (dd, *J* = 7.6, 2.0 Hz, 1H), 6.93–6.86 (multiple peaks, 2H), 6.14 (s, 1H), 3.87 (s, 3H).

<sup>13</sup>C NMR (126 MHz, CDCl<sub>3</sub>): δ 164.7, 143.2, 142.2, 127.2, 124.8, 123.5, 120.2, 119.4, 118.5, 52.3.

HRMS (HESI): *m/z* calcd for C<sub>10</sub>H<sub>8</sub>O<sub>4</sub>Br [M+H]<sup>+</sup>: 270.96005. Found: 270.95983.

### General Procedure 1 (GP1) for the Synthesis of Substrates 5a–5e

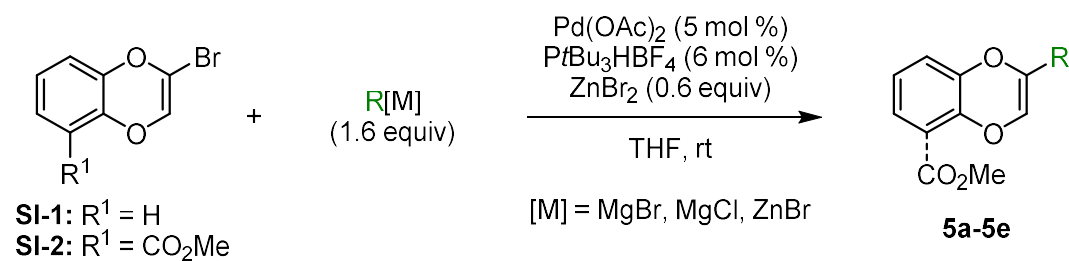

<sup>6</sup> Lee, T. V.; Leigh, A. J.; Chapleo, C. B. *Tetrahedron* **1990**, *46*, 921.

A representative procedure is given for the synthesis of 2-alkyl-substituted 1,4-benzodioxines: synthesis of **5a**. To a suspension of methyl 2-bromo-1,4-benzodioxine-5-carboxylate **SI-2** (5.00 g, 18.4 mmol, 1 equiv) and *t*Bu<sub>3</sub>PHBF<sub>4</sub> (321 mg, 1.10 mmol, 0.06 equiv) in THF (30 mL), Pd(OAc)<sub>2</sub> (207 mg, 0.922 mmol, 0.05 equiv) and a solution of ZnBr<sub>2</sub> (~30 wt% solution, 2.49 g, 11.1 mmol, 0.6 equiv) was added. Cyclopropylmagnesium bromide (59.0 ml, 0.5 M in THF, 29.5 mmol, 1.6 equiv) was added dropwise over 1 h using a syringe pump while maintaining the temperature at 20–25 °C. Reaction was monitored by HPLC. Once starting material was consumed (total reaction time within 2 h), reaction was quenched with water (10 mL) and saturated aqueous ammonium chloride solution (50 mL) was added. The organic layer was extracted with EtOAc (3 × 50 mL). The combined organic extracts were dried over MgSO<sub>4</sub>, filtered through a short pad of silica gel, followed by copious EtOAc washes, and concentrated in vacuo. Purification by column chromatography (elution gradient from 0–5% EtOAc in hexanes) yielded the title compound as an off-white solid (2.42 g, 57% yield).

### Methyl 2-cyclopropyl-1,4-benzodioxine-5-carboxylate (**5a**)

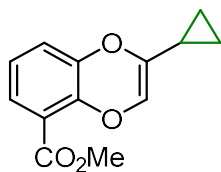

**5a**

<sup>1</sup>H NMR (500 MHz, CDCl<sub>3</sub>): δ 7.33 (dd, *J* = 7.7, 2.0 Hz, 1H), 6.82–6.76 (multiple peaks, 2H), 5.89 (s, 1H), 3.85 (s, 3H), 1.30 (m, 1H), 0.69–0.61 (multiple peaks, 4H).

<sup>13</sup>C NMR (126 MHz, CDCl<sub>3</sub>): δ 165.3, 143.41, 143.39, 139.3, 125.8, 122.6, 121.6, 119.8, 118.7, 52.1, 9.3, 3.3.

HRMS (DART): *m/z* calcd for C<sub>13</sub>H<sub>13</sub>O<sub>4</sub> [M+H]<sup>+</sup>: 233.08084. Found: 233.08077.

### 2-Cyclopropyl-1,4-benzodioxine (**5b**)

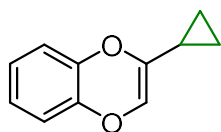

**5b**

The compound was synthesized using **GPI** with 2-bromo-1,4-benzodioxine (700 mg, 3.29 mmol, 1 equiv). Purification by column chromatography using hexanes yielded the title compound as a colorless liquid (364 mg, 64% yield).

<sup>1</sup>H NMR (500 MHz, CDCl<sub>3</sub>): δ 6.81–6.76 (multiple peaks, 2H), 6.65–6.59 (multiple peaks, 2H), 5.78 (s, 1H), 1.29 (m, 1H), 0.66–0.61 (multiple peaks, 4H).

$^{13}\text{C}$  NMR (126 MHz,  $\text{CDCl}_3$ ):  $\delta$  142.7, 142.6, 138.8, 123.8, 123.6, 121.4, 116.0, 115.8, 9.5, 3.2.

HRMS (DART):  $m/z$  calcd for  $\text{C}_{11}\text{H}_{11}\text{O}_2$   $[\text{M}+\text{H}]^+$ : 175.07536. Found: 175.07513.

### Methyl 2-cyclobutyl-1,4-benzodioxine-5-carboxylate (**5c**)

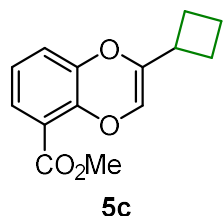

The compound was synthesized using **GP1** with methyl 2-bromo-1,4-benzodioxine-5-carboxylate (2.00 g, 7.38 mmol, 1 equiv). Instead of the Grignard reagent, cyclobutylzinc bromide (20.7 mL, 0.5 M in THF, 10.3 mmol, 1.4 equiv) was used without  $\text{ZnBr}_2$ . Purification by column chromatography (elution gradient 0–5% EtOAc in hexanes) yielded the title compound as a colorless oil (682 mg, 38% yield).

$^1\text{H}$  NMR (500 MHz,  $\text{CDCl}_3$ ):  $\delta$  7.33 (m, 1H), 6.84–6.80 (multiple peaks, 2H), 5.86 (s, 1H), 3.85 (s, 3H), 2.86 (p,  $J = 8.4$  Hz, 1H), 2.16–2.02 (multiple peaks, 4H), 1.96–1.79 (multiple peaks, 2H).

$^{13}\text{C}$  NMR (126 MHz,  $\text{CDCl}_3$ ):  $\delta$  165.4, 143.7, 143.4, 140.3, 125.7, 122.7, 121.1, 119.8, 118.7, 52.1, 34.2, 25.1, 18.4.

HRMS (DART):  $m/z$  calcd for  $\text{C}_{14}\text{H}_{15}\text{O}_4$   $[\text{M}+\text{H}]^+$ : 247.09649. Found: 247.09660.

### 2-Cyclohexyl-1,4-benzodioxine (**5d**)

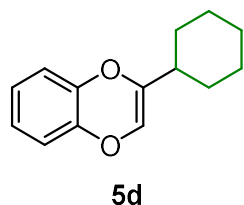

The compound was synthesized using **GP1** with 2-bromo-1,4-benzodioxine (700 mg, 3.29 mmol, 1 equiv) and cyclohexylmagnesium chloride (5.3 mL, 1.0 M in 2-MeTHF, 5.3 mmol, 1.6 equiv). Purification by column chromatography using hexanes yielded the title compound as a white solid (230 mg, 32% yield).

$^1\text{H}$  NMR (500 MHz,  $\text{CDCl}_3$ ):  $\delta$  6.80–6.76 (multiple peaks, 2H), 6.65–6.59 (multiple peaks, 2H), 5.69 (s, 1H), 1.91–1.66 (multiple peaks, 6H), 1.31–1.13 (multiple peaks, 5H).

$^{13}\text{C}$  NMR (126 MHz,  $\text{CDCl}_3$ ):  $\delta$  143.2, 142.8, 142.4, 123.6, 123.5, 120.7, 116.0, 115.7, 38.4, 29.6, 26.0, 25.6.

**HRMS (DART):**  $m/z$  calcd for  $C_{14}H_{17}O_2$   $[M+H]^+$ : 217.12231. Found: 217.12216.

### 2-Cycloheptyl-1,4-benzodioxine (**5e**)

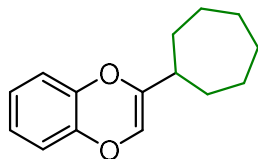

**5e**

The compound was synthesized using **GP1** with 2-bromo-1,4-benzodioxine (1.00 g, 4.69 mmol, 1 equiv) and cycloheptylmagnesium bromide (3.8 mL, 2.0 M in  $Et_2O$ , 7.5 mmol, 1.6 equiv). Purification by column chromatography using hexanes yielded the title compound as a colorless liquid (202 mg, 19% yield).

**$^1H$  NMR** (500 MHz,  $CDCl_3$ ):  $\delta$  6.80–6.75 (multiple peaks, 2H), 6.66–6.59 (multiple peaks, 2H), 5.73 (s, 1H), 2.05 (m, 1H), 1.85–1.40 (multiple peaks, 12H).

**$^{13}C$  NMR** (126 MHz,  $CDCl_3$ ):  $\delta$  143.2, 143.1, 142.8, 123.6, 123.5, 120.4, 116.0, 115.7, 40.3, 31.5, 28.3, 26.4.

**HRMS (DART):**  $m/z$  calcd for  $C_{15}H_{19}O_2$   $[M+H]^+$ : 231.13796. Found: 231.13808.

### General Procedure 2 (GP2) for the Synthesis of Substrates **5g**, **5i–5x**

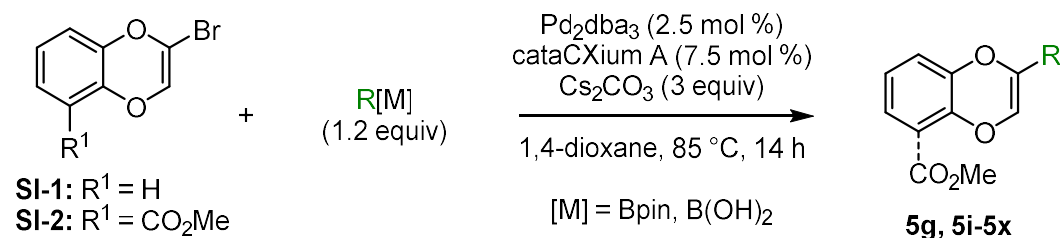

A representative procedure is given for the synthesis of 2-aryl- or 2-heteroaryl-substituted 1,4-benzodioxines: synthesis of **5g**. A 20 mL tube was charged with 2-bromo-1,4-benzodioxine **SI-1** (700 mg, 3.29 mmol, 1 equiv), (3,4,5-trimethoxyphenyl)boronic acid (836 mg, 3.94 mmol, 1.2 equiv),  $Pd_2dba_3$  (75.2 mg, 0.0822 mmol, 0.025 equiv), cataCXium A (88.4 mg, 0.246 mmol, 0.075 equiv),  $Cs_2CO_3$  (3.21 g, 9.86 mmol, 3 equiv), and 1,4-dioxane (14 mL). The tube was sealed and heated to 85 °C for 14 h. The reaction was diluted with EtOAc, filtered through a short pad of Celite, followed by copious EtOAc washes, and concentrated in vacuo. Purification by column chromatography (elution gradient from 0–10% EtOAc in hexanes) yielded the title compound as an off-white solid (615 mg, 62% yield).

### 2-(3,4,5-Trimethoxyphenyl)-1,4-benzodioxine (5g)

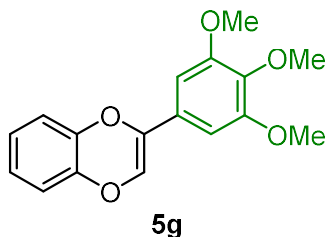

**<sup>1</sup>H NMR** (500 MHz, CDCl<sub>3</sub>):  $\delta$  6.90–6.81 (multiple peaks, 3H), 6.71 (m, 1H), 6.68 (s, 2H), 6.39 (s, 1H), 3.89 (s, 6H), 3.86 (s, 3H).

**<sup>13</sup>C NMR** (100 MHz, *d*<sub>6</sub>-DMSO):  $\delta$  153.5, 142.5, 142.0, 138.1, 136.1, 126.6, 124.98, 124.91, 124.4, 116.9, 116.4, 101.0, 60.5, 56.5.

**HRMS** (DART): *m/z* calcd for C<sub>17</sub>H<sub>17</sub>O<sub>5</sub> [M+H]<sup>+</sup>: 301.10705. Found: 301.10716.

### 2-Ethylbenzo[*b*][1,4]dioxine (5h)

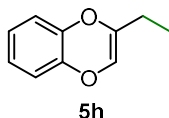

The compound was synthesized using **GP1** with 2-bromo-1,4-benzodioxine (**1g**, 4.69 mmol, 1 equiv) and ethylmagnesium bromide (7.5 mL, 1.0 M in THF, 1.6 equiv). Purification by column chromatography using hexanes yielded the title compound as colorless oil (699 mg, 86 wt% containing des-Br impurity, net weight 601 mg, 3.71 mmol, 79% yield). The mixture was directly applied for the reduction. NMR spectra were run by collecting the earlier pure fractions, and match those reported.<sup>1</sup>

**<sup>1</sup>H NMR** (400 MHz, CD<sub>2</sub>Cl<sub>2</sub>):  $\delta$  6.83–6.78 (multiple peaks, 2H), 6.68–6.59 (multiple peaks, 2H), 5.74 (t, *J* = 1.2 Hz, 1H), 2.00 (qd, *J* = 7.4, 1.2 Hz, 1H), 1.06 (t, *J* = 7.4 Hz, 3H).

**<sup>13</sup>C NMR** (100 MHz, CD<sub>2</sub>Cl<sub>2</sub>):  $\delta$  143.3, 143.0, 139.9, 124.2, 124.0, 121.2, 116.3, 116.1, 23.0, 10.9.

### 2-(Benzo[*d*][1,3]dioxol-5-yl)benzo[*b*][1,4]dioxine (5i)

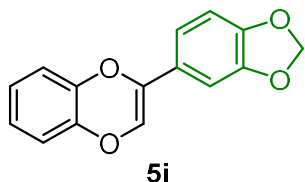

The compound was synthesized using **GP2** with 2-bromo-1,4-benzodioxine (700 mg, 3.29 mmol, 1 equiv) and (3,4-methylenedioxyphenyl)boronic acid (654 mg, 3.94 mmol, 1.2 equiv). Purification by column chromatography using hexanes yielded the title compound as a white solid (743 mg, 89% yield).

**<sup>1</sup>H NMR** (500 MHz, DMSO-*d*<sub>6</sub>): δ 7.12 (m, 1H), 7.05 (dd, *J* = 8.5, 1.3 Hz, 1H), 6.98 (s, 1H), 6.96–6.90 (multiple peaks, 4H), 6.81 (m, 1H), 6.04 (s, 2H).

**<sup>13</sup>C NMR** (126 MHz, DMSO-*d*<sub>6</sub>): δ 147.6, 147.3, 141.9, 141.5, 135.6, 124.5, 124.5, 124.4, 123.1, 116.7, 116.4, 115.9, 108.2, 103.3, 101.2.

**HRMS** (DART): *m/z* calcd for C<sub>15</sub>H<sub>11</sub>O<sub>4</sub> [M+H]<sup>+</sup>: 255.06519. Found: 255.06516.

### Methyl 2-(2,2-difluorobenzo[*d*][1,3]dioxol-5-yl)benzo[*b*][1,4]dioxine-5-carboxylate (**5j**)

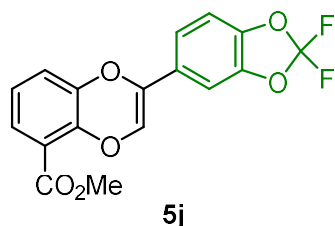

The compound was synthesized using **GP2** with methyl 2-bromo-1,4-benzodioxine-5-carboxylate (800 mg, 2.95 mmol, 1 equiv) and 2,2-difluorobenzo[1,3]dioxole-5-boronic acid (775 mg, 3.84 mmol, 1.3 equiv). Purification by column chromatography using gradient 0–30% EtOAc in hexanes, followed by recrystallization from CH<sub>2</sub>Cl<sub>2</sub>/hexanes, yielded the title compound **5j** as a white crystalline solid (480 mg, 44% yield).

**<sup>1</sup>H NMR** (500 MHz, CDCl<sub>3</sub>): δ 7.41 (dd, *J* = 7.8, 1.9 Hz, 1H), 7.20–7.16 (m, 2H), 7.05 (d, *J* = 8.4 Hz, 1H), 6.96–6.89 (m, 2H), 6.52 (s, 1H), 3.89 (s, 3H).

**<sup>13</sup>C NMR** (126 MHz, CDCl<sub>3</sub>): δ 165.1, 144.2, 143.8, 143.2, 142.7, 136.4, 131.8 (t, *J*<sub>CF</sub> = 260 Hz), 127.2, 126.5, 123.6, 123.5, 120.3, 119.2, 118.9, 109.6, 105.1, 52.4.

**<sup>19</sup>F NMR** (471 MHz, CDCl<sub>3</sub>): δ -50.1.

**HRMS** (DART): *m/z* calcd for C<sub>17</sub>H<sub>11</sub>O<sub>6</sub>F<sub>2</sub> [M+H]<sup>+</sup>: 349.05182. Found: 349.05192.

### 2-(benzo[*b*]thiophen-3-yl)benzo[*b*][1,4]dioxine (**5k**)

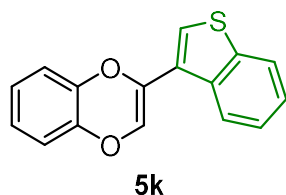

The compound was synthesized using **GP2** with 2-bromo-1,4-benzodioxine (300 mg, 1.41 mmol, 1 equiv) and thianaphthene-3-boronic acid (301 mg, 1.69 mmol, 1.2 equiv). Purification by column



chromatography (elution gradient from 0–5% CH<sub>2</sub>Cl<sub>2</sub> in hexanes) yielded the title compound as a white solid (364 mg, 97% yield).

<sup>1</sup>H NMR (500 MHz, CDCl<sub>3</sub>): δ 7.98 (d, *J* = 7.7 Hz, 1H), 7.86 (d, *J* = 7.7 Hz, 1H), 7.58 (s, 1H), 7.44–7.35 (multiple peaks, 2H), 6.91–6.86 (multiple peaks, 2H), 6.81 (m, 1H), 6.74 (m, 1H), 6.46 (s, 1H).

<sup>13</sup>C NMR (126 MHz, CDCl<sub>3</sub>): δ 142.8, 142.3, 140.4, 136.2, 133.8, 127.4, 124.8, 124.7, 124.6, 124.3, 124.23, 124.22, 123.1, 123.0, 116.4, 116.1.

HRMS (DART): *m/z* calcd for C<sub>16</sub>H<sub>11</sub>O<sub>2</sub>S [M+H]<sup>+</sup>: 267.04743. Found: 267.04758.

### Methyl 2-(dibenzo[*b,d*]furan-4-yl)benzo[*b*][1,4]dioxine-5-carboxylate (**5l**)

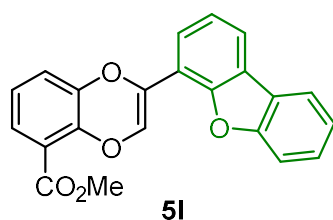

The compound was synthesized using **GP2** with methyl 2-bromo-1,4-benzodioxine-5-carboxylate (1.00 g, 3.69 mmol, 1 equiv) and 4-dibenzofuranylboronic acid (1.01 g, 4.80 mmol, 1.3 equiv). Purification by column chromatography (elution gradient from 10–100% EtOAc in hexanes) yielded the title compound as a white solid (696 mg, 53% yield).

<sup>1</sup>H-NMR (500 MHz, CDCl<sub>3</sub>): δ 7.95 (d, *J* = 7.6 Hz, 1H), 7.88 (dd, *J* = 7.7, 0.9 Hz, 1H), 7.72 (dd, *J* = 7.7, 0.7 Hz, 1H), 7.63 (s, 1H), 7.58 (d, *J* = 8.2 Hz, 1H), 7.50–7.46 (m, 1H), 7.43 (dd, *J* = 8.1, 1.6 Hz, 1H), 7.40–7.35 (m, 2H), 7.02 (dd, *J* = 7.8, 1.6 Hz, 1H), 6.93 (t, *J* = 7.9 Hz, 1H), 3.93 (s, 3H).

<sup>13</sup>CNMR (125 MHz, CDCl<sub>3</sub>): δ 165.2, 155.8, 150.9, 143.5, 142.9, 132.8, 128.4, 127.4, 126.1, 124.5, 123.8, 123.3, 123.2, 122.8, 122.1, 120.7, 120.1, 119.9, 119.0, 115.7, 111.8, 52.3.

HRMS (DART): *m/z* calcd for C<sub>22</sub>H<sub>15</sub>O<sub>5</sub> [M+H]<sup>+</sup>: 359.09140. Found: 359.09129.

### Methyl 2-(dibenzo[*b,d*]thiophen-4-yl)benzo[*b*][1,4]dioxine-5-carboxylate (**5m**)

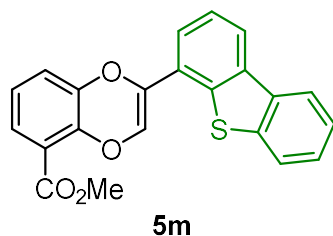

The compound was synthesized using **GP2** with methyl 2-bromo-1,4-benzodioxine-5-carboxylate (1.00 g, 3.69 mmol, 1 equiv) and 4-dibenzothienylboronic acid (1.09 g, 4.80 mmol, 1.3 equiv). Purification by column chromatography (elution gradient from 0–100% EtOAc in hexanes) yielded the title compound as a white solid (459 mg, 33% yield).

<sup>1</sup>H-NMR (500 MHz, CDCl<sub>3</sub>): δ 8.16–8.13 (m, 2H), 7.88–7.86 (m, 1H), 7.59 (dd, *J* = 8.2, 2.1 Hz, 1H), 7.50–7.44 (m, 4H), 7.07 (dd, *J* = 8.0, 1.6 Hz, 1H), 6.95 (t, *J* = 8.0 Hz, 1H), 6.82 (s, 1H), 3.91 (s, 1H).

<sup>13</sup>CNMR (125 MHz, CDCl<sub>3</sub>): δ 165.1, 143.4, 143.0, 139.4, 137.0, 136.7, 135.6, 135.0, 127.1, 126.3, 125.9, 124.6, 124.6, 123.5, 123.4, 123.4, 122.5, 121.9, 121.6, 120.3, 119.1, 52.3.

HRMS (DART): *m/z* calcd for C<sub>22</sub>H<sub>15</sub>O<sub>4</sub>S [M+H]<sup>+</sup>: 375.06856. Found: 375.06781.

### 5-(Benzo[*b*][1,4]dioxin-2-yl)-1-methyl-1*H*-pyrazole (**5n**)

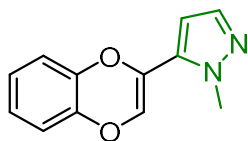

**5n**

The compound was synthesized using **GP2** with 2-bromo-1,4-benzodioxine (700 mg, 3.29 mmol, 1 equiv) and 1-methyl-1*H*-pyrazole-5-boronic acid pinacol ester (820 mg, 3.94 mmol, 1.2 equiv). Increased catalyst loading was used: Pd<sub>2</sub>dba<sub>3</sub> (150 mg, 0.164 mmol, 0.05 equiv) and cataCXium A (177 mg, 0.493 mmol, 0.15 equiv). Purification by column chromatography (elution gradient from 5–15% EtOAc in hexanes) yielded the title compound as an orange oil (545 mg, 77% yield).

<sup>1</sup>H NMR (500 MHz, CDCl<sub>3</sub>): δ 7.42 (d, *J* = 1.8 Hz, 1H), 6.91–6.86 (multiple peaks, 2H), 6.75–6.70 (multiple peaks, 2H), 6.29 (d, *J* = 1.8 Hz, 1H), 6.21 (s, 1H), 3.97 (s, 3H).

<sup>13</sup>C NMR (126 MHz, CDCl<sub>3</sub>): δ 142.3, 141.8, 138.3, 133.7, 128.7, 126.5, 124.60, 124.55, 116.34, 116.28, 106.33, 38.1.

HRMS (DART): *m/z* calcd for C<sub>12</sub>H<sub>11</sub>O<sub>2</sub>N<sub>2</sub> [M+H]<sup>+</sup>: 215.08150. Found: 215.08131.

### 7-(Benzo[*b*][1,4]dioxin-2-yl)-1-methyl-1*H*-indazole (**5o**)

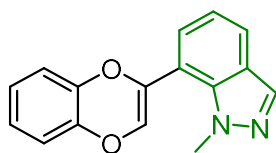

**5o**

The compound was synthesized using **GP2** with 2-bromo-1,4-benzodioxine (700 mg, 3.29 mmol, 1 equiv) and 1-methylindazole-4-boronic acid (694 mg, 3.94 mmol, 1.2 equiv). Increased catalyst loading was used: Pd<sub>2</sub>dba<sub>3</sub> (150 mg, 0.164 mmol, 0.05 equiv) and cataCXium A (177 mg, 0.493 mmol, 0.15 equiv). Purification by column chromatography (elution gradient from 5–15% EtOAc in hexanes) yielded the title compound as an off-white solid (739 mg, 85% yield).

<sup>1</sup>H NMR (500 MHz, CDCl<sub>3</sub>): δ 8.16 (s, 1H), 7.38–7.33 (multiple peaks, 2H), 7.27 (dd, *J* = 6.2, 1.8 Hz, 1H), 6.93–6.85 (multiple peaks, 3H), 6.75 (dd, *J* = 7.2, 1.8 Hz, 1H), 6.63 (s, 1H), 4.08 (s, 3H).

<sup>13</sup>C NMR (126 MHz, CDCl<sub>3</sub>): δ 142.8, 142.2, 140.3, 136.6, 132.4, 126.0, 125.5, 124.8, 124.3, 124.2, 119.9, 116.4, 116.2, 116.1, 109.9, 35.6.

HRMS (DART): *m/z* calcd for C<sub>16</sub>H<sub>13</sub>O<sub>2</sub>N<sub>2</sub> [M+H]<sup>+</sup>: 265.09715. Found: 265.09733.

#### 4-(Benzo[*b*][1,4]dioxin-2-yl)-3,5-dimethylisoxazole (**5p**)

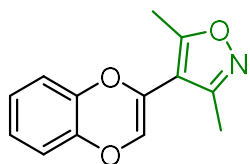

**5p**

The compound was synthesized using **GP2** with 2-bromo-1,4-benzodioxine (700 mg, 3.29 mmol, 1 equiv) and 3,5-dimethyl-4-(4,4,5,5-tetramethyl-1,3,2-dioxaborolan-2-yl)isoxazole (880 mg, 3.94 mmol, 1.2 equiv). Purification by column chromatography (elution gradient from 0–10% EtOAc in hexanes) yielded the title compound as an off-white solid (562 mg, 75% yield).

<sup>1</sup>H NMR (500 MHz, CDCl<sub>3</sub>): δ 6.89–6.85 (multiple peaks, 2H), 6.72–6.68 (multiple peaks, 2H), 5.98 (s, 1H), 2.47 (s, 3H), 2.31 (s, 3H).

<sup>13</sup>C NMR (126 MHz, CDCl<sub>3</sub>): δ 167.2, 158.5, 142.4, 142.0, 128.9, 125.7, 124.5, 124.3, 116.2, 116.1, 108.0, 12.0, 11.0.

HRMS (DART): *m/z* calcd for C<sub>13</sub>H<sub>12</sub>O<sub>3</sub>N [M+H]<sup>+</sup>: 230.08117. Found: 230.08123.

#### 5-(Benzo[*b*][1,4]dioxin-2-yl)-2-fluoropyridine (**5q**)

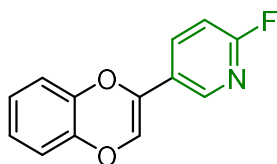

**5q**

The compound was synthesized using **GP2** with 2-bromo-1,4-benzodioxine (700 mg, 3.29 mmol, 1 equiv) and 2-fluoropyridine-5-boronic acid (556 mg, 3.94 mmol, 1.2 equiv). Purification by column chromatography (elution gradient from 0–5% EtOAc in hexanes) yielded the title compound as a white solid (643 mg, 85% yield).

**<sup>1</sup>H NMR** (500 MHz, CDCl<sub>3</sub>): δ 8.33 (s, 1H), 7.85 (app t, *J* = 8.0 Hz, 1H), 6.95–6.86 (multiple peaks, 3H), 6.81 (m, 1H), 6.72 (m, 1H), 6.46 (s, 1H).

**<sup>13</sup>C NMR** (126 MHz, CDCl<sub>3</sub>): δ 163.2 (d, *J*<sub>CF</sub> = 240 Hz), 142.6 (d, *J*<sub>CF</sub> = 15.2 Hz), 142.2, 141.8, 136.0 (d, *J*<sub>CF</sub> = 7.9 Hz), 133.8, 125.5 (d, *J*<sub>CF</sub> = 4.8 Hz), 124.53, 124.49, 123.9 (d, *J*<sub>CF</sub> = 1.8 Hz), 116.4, 116.2, 109.4 (d, *J*<sub>CF</sub> = 37.9 Hz).

**<sup>19</sup>F NMR** (376 MHz, CDCl<sub>3</sub>): δ -68.3.

**HRMS** (DART): *m/z* calcd for C<sub>13</sub>H<sub>9</sub>O<sub>2</sub>NF [M+H]<sup>+</sup>: 230.06118. Found: 230.06112.

#### 5-(Benzo[*b*][1,4]dioxin-2-yl)-2-chloropyridine (**5r**)

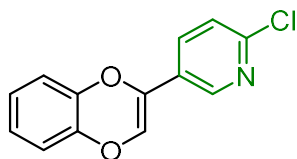

**5r**

The compound was synthesized using **GP2** with 2-bromo-1,4-benzodioxine (700 mg, 3.29 mmol, 1 equiv) and 2-chloropyridine-5-boronic acid (543 mg, 3.45 mmol, 1.05 equiv). Purification by column chromatography (elution gradient from 50–60% CH<sub>2</sub>Cl<sub>2</sub> in hexanes) yielded the title compound as an off-white solid (609 mg, 75% yield).

**<sup>1</sup>H NMR** (500 MHz, CDCl<sub>3</sub>): δ 8.48 (s, 1H), 7.70 (d, *J* = 8.4 Hz, 1H), 7.31 (d, *J* = 8.4 Hz, 1H), 6.92–6.86 (multiple peaks, 2H), 6.81 (m, 1H), 6.73 (m, 1H), 6.52 (s, 1H).

**<sup>13</sup>C NMR** (126 MHz, CDCl<sub>3</sub>): δ 150.6, 144.3, 142.1, 141.7, 133.6, 133.0, 126.4, 124.60, 124.58, 124.56, 124.0, 116.40, 116.2.

**HRMS** (DART): *m/z* calcd for C<sub>13</sub>H<sub>9</sub>O<sub>2</sub>NCl [M+H]<sup>+</sup>: 246.03163. Found: 246.03136.

### Bethyl 2-(6-(trifluoromethyl)pyridin-3-yl)benzo[*b*][1,4]dioxine-5-carboxylate (**5s**)

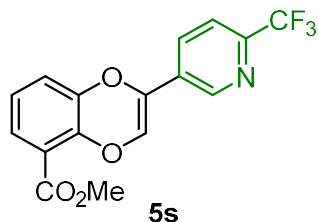

The compound was synthesized using **GP2** with methyl 2-bromo-1,4-benzodioxine-5-carboxylate (1.00 g, 3.69 mmol, 1 equiv) and (6-(trifluoromethyl)pyridin-3-yl)boronic acid (916 mg, 4.80 mmol, 1.3 equiv). Purification by column chromatography (elution gradient from 0–20% EtOAc in hexanes) yielded the title compound as a white solid (842 mg, 68% yield).

<sup>1</sup>H-NMR (500 MHz, CDCl<sub>3</sub>): δ 8.80 (d, *J* = 1.5 Hz, 1H), 7.92 (dd, *J* = 8.2, 1.7 Hz, 1H), 7.68 (d, *J* = 8.2 Hz, 1H), 7.45 (dd, *J* = 7.7, 1.9 Hz, 1H), 7.00–6.94 (m, 2H), 6.77 (s, 1H), 3.90 (s, 3H).

<sup>13</sup>CNMR (125 MHz, CDCl<sub>3</sub>): δ 164.8, 147.4 (q, *J*<sub>CF</sub> = 35 Hz), 144.5, 142.7, 142.0, 133.9, 131.3, 129.6 (q, *J*<sub>CF</sub> = 1.1 Hz), 126.7, 125.8, 123.9, 121.4 (q, *J*<sub>CF</sub> = 272 Hz), 120.3, 120.2 (q, *J*<sub>CF</sub> = 2.8 Hz), 119.4, 52.4.

<sup>19</sup>FNMR (471 MHz, CDCl<sub>3</sub>): δ -67.9.

HRMS (DART): *m/z* calcd for C<sub>16</sub>H<sub>11</sub>O<sub>4</sub>NF<sub>3</sub> [M+H]<sup>+</sup>: 338.06347. Found: 338.06309.

### 5-(Benzo[*b*][1,4]dioxin-2-yl)-2-(trifluoromethyl)pyridine (**5t**)

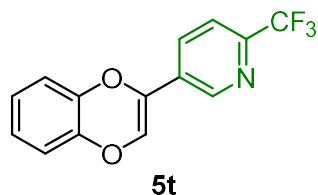

The compound was synthesized using **GP2** with 2-bromo-1,4-benzodioxine (500 mg, 2.35 mmol, 1 equiv) and 2-trifluoromethylpyridin-5-ylboronic acid HCl (640 mg, 2.82 mmol, 1.2 equiv). Purification by column chromatography (elution gradient from 0–10% EtOAc in hexanes) yielded the title compound as a white solid (587 mg, 90% yield).

<sup>1</sup>H NMR (500 MHz, CDCl<sub>3</sub>): δ 8.79 (s, 1H), 7.92 (d, *J* = 8.1 Hz, 1H), 7.67 (d, *J* = 8.1 Hz, 1H), 6.93–6.88 (multiple peaks, 2H), 6.83 (m, 1H), 6.74 (m, 1H), 6.66 (s, 1H).

<sup>13</sup>C NMR (126 MHz, CDCl<sub>3</sub>): δ 147.0 (q, *J*<sub>CF</sub> = 35.0 Hz), 144.3, 142.0, 141.5, 133.4, 131.1, 130.2 (q, *J*<sub>CF</sub> = 1.0 Hz), 126.0, 124.8, 124.7, 121.5 (q, *J*<sub>CF</sub> = 274 Hz), 120.2 (q, *J*<sub>CF</sub> = 2.8 Hz), 116.5, 116.3.

<sup>19</sup>F NMR (376 MHz, CDCl<sub>3</sub>): δ -67.82.

HRMS (DART): *m/z* calcd for C<sub>14</sub>H<sub>9</sub>O<sub>2</sub>NF<sub>3</sub> [M+H]<sup>+</sup>: 280.05799. Found: 280.05799.

### 3-(Benzo[*b*][1,4]dioxin-2-yl)pyridine (5u)

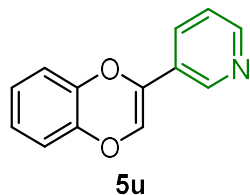

The compound was synthesized using **GP2** with 2-bromo-1,4-benzodioxine (700 mg, 3.29 mmol, 1 equiv) and 3-pyridylboronic acid (485 mg, 3.94 mmol, 1.2 equiv). Increased catalyst loading was used: Pd<sub>2</sub>dba<sub>3</sub> (150 mg, 0.164 mmol, 0.05 equiv) and *t*Bu<sub>2</sub>PFcHBF<sub>4</sub> (143 mg, 0.493 mmol, 0.15 equiv). Purification by column chromatography (elution gradient from 10–30% EtOAc in hexanes) yielded the title compound as an off-white solid (163 mg, 24% yield).

<sup>1</sup>H NMR (500 MHz, CDCl<sub>3</sub>): δ 8.72 (d, *J* = 2.0 Hz, 1H), 8.53 (dd, *J* = 4.5, 1.4 Hz, 1H), 7.76 (app dt, *J* = 8.0, 2.0 Hz, 1H), 7.28 (dd, *J* = 8.0, 4.5 Hz, 1H), 6.92–6.86 (multiple peaks, 2H), 6.82 (m, 1H), 6.73 (m, 1H), 6.53 (s, 1H).

<sup>13</sup>C NMR (126 MHz, CDCl<sub>3</sub>): δ 149.1, 144.6, 142.4, 141.9, 134.4, 130.4, 127.4, 124.44, 124.41, 124.3, 123.2, 116.4, 116.1.

HRMS (DART): *m/z* calcd for C<sub>13</sub>H<sub>10</sub>O<sub>2</sub>N [M+H]<sup>+</sup>: 212.07061. Found: 212.07058.

### Methyl 2-(3-pyridyl)-1,4-benzodioxine-5-carboxylate (5v)

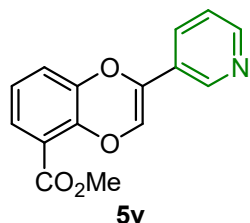

The compound was synthesized using **GP2** with methyl 2-bromo-1,4-benzodioxine-5-carboxylate (1.00 g, 3.69 mmol, 1 equiv) and 3-pyridylboronic acid (574 mg, 4.80 mmol, 1.3 equiv). Purification by column chromatography (elution gradient from 0–80% EtOAc in hexanes) yielded the title compound as a white solid (590 mg, 58% yield).

<sup>1</sup>H-NMR (500 MHz, CDCl<sub>3</sub>): δ 8.72 (d, *J* = 2.0 Hz, 1H), 8.56 (dd, *J* = 4.8, 1.4 Hz, 1H), 7.75 (dt, *J* = 7.9, 1.8 Hz, 1H), 7.42 (dd, *J* = 7.8, 1.8 Hz, 1H), 7.31–7.29 (m, 1H), 6.98–6.91 (m, 2H), 6.64 (s, 1H), 3.89 (s, 3H).

<sup>13</sup>CNMR (125 MHz, CDCl<sub>3</sub>): δ 165.0, 149.4, 144.7, 143.0, 142.5, 134.9, 130.4, 126.8, 126.4, 124.1, 123.5, 123.5, 123.3, 120.2, 120.2, 119.1, 52.3.

HRMS (DART): *m/z* calcd for C<sub>22</sub> H<sub>15</sub>O<sub>5</sub> [M+H]<sup>+</sup>: 359.09169. Found: 359.09140.

### 5-(Benzo[*b*][1,4]dioxin-2-yl)-2-(methylthio)pyrimidine (5w)

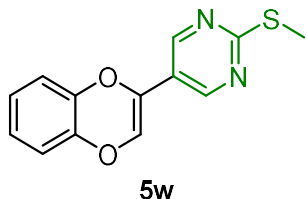

The compound was synthesized using **GP2** with 2-bromo-1,4-benzodioxine (700 mg, 3.29 mmol, 1 equiv) and 2-(methylthio)pyrimidinyl-5-boronic acid pinacol ester (994 mg, 3.94 mmol, 1.2 equiv). Increased catalyst loading was used: Pd<sub>2</sub>dba<sub>3</sub> (150 mg, 0.164 mmol, 0.05 equiv) and cataCXium A (177 mg, 0.493 mmol, 0.15 equiv). Purification by column chromatography (elution gradient from 70–80% CH<sub>2</sub>Cl<sub>2</sub> in hexanes) yielded the title compound as a white solid (574 mg, 68% yield).

<sup>1</sup>H NMR (500 MHz, CDCl<sub>3</sub>): δ 8.60 (s, 2H), 6.92–6.86 (multiple peaks, 2H), 6.80 (m, 1H), 6.73 (m, 1H), 6.47 (s, 1H), 2.58 (s, 3H).

<sup>13</sup>C NMR (126 MHz, CDCl<sub>3</sub>): δ 172.0, 151.7, 142.0, 141.7, 132.4, 124.62, 124.60, 123.9, 120.6, 116.4, 116.2, 14.2.

HRMS (DART): *m/z* calcd for C<sub>13</sub>H<sub>11</sub>O<sub>2</sub>N<sub>2</sub>S [M+H]<sup>+</sup>: 259.05357. Found: 259.05333.

### 5-(Benzo[*b*][1,4]dioxin-2-yl)-2-methoxypyrimidine (5x)

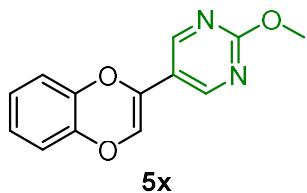

The compound was synthesized using **GP2** with 2-bromo-1,4-benzodioxine (700 mg, 3.29 mmol, 1 equiv) and 2-methoxypyrimidinyl-5-boronic acid (607 mg, 3.94 mmol, 1.2 equiv). Increased catalyst loading was used: Pd<sub>2</sub>dba<sub>3</sub> (150 mg, 0.164 mmol, 0.05 equiv) and cataCXium A (177 mg, 0.493 mmol, 0.15 equiv). Purification by column chromatography (elution gradient from 10–15% EtOAc in hexanes) yielded the title compound as an off-white solid (170 mg, 21% yield).

<sup>1</sup>H NMR (500 MHz, CDCl<sub>3</sub>): δ 8.60 (s, 2H), 6.92–6.86 (multiple peaks, 2H), 6.80 (m, 1H), 6.72 (m, 1H), 6.41 (s, 1H), 4.04 (s, 3H).

<sup>13</sup>C NMR (126 MHz, CDCl<sub>3</sub>): δ 165.3, 154.4, 142.1, 141.8, 132.5, 124.6, 124.5, 123.2, 119.5, 116.5, 116.2, 55.1.

HRMS (DART): *m/z* calcd for C<sub>13</sub>H<sub>11</sub>O<sub>3</sub>N<sub>2</sub> [M+H]<sup>+</sup>: 243.07642. Found: 243.07622.

### Mimethyl 1,4-benzodioxine-2,5-dicarboxylate (**5y**)

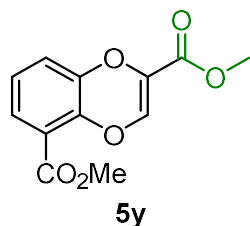

A tube containing methyl 2-bromo-1,4-benzodioxine-5-carboxylate (500 mg, 1.84 mmol, 1 equiv), Pd(OAc)<sub>2</sub> (10.4 mg, 0.0461 mmol, 0.025 equiv), cataCXium A (49.6 mg, 0.138 mmol, 0.075 equiv) in MeOH (3 mL) was heated to 80 °C under CO (100 psi) for 16 h in Biotage Endeavor reactor. At the end of the reaction, the reaction was concentrated in vacuo and extracted with EtOAc (30 mL). The residual solid was filtered and washed with EtOAc (3 × 5 mL). The combined EtOAc extracts were concentrated in vacuo. Purification by column chromatography (elution gradient 10–20% EtOAc in hexanes) yielded the title compound as a white solid (310 mg, 67% yield).

<sup>1</sup>H NMR (500 MHz, CDCl<sub>3</sub>): δ 7.38 (dd, *J* = Hz, 1H), 7.01 (s, 1H), 6.97–6.90 (multiple peaks, 2H), 3.87 (s, 3H), 3.82 (s, 3H).

<sup>13</sup>C NMR (126 MHz, CDCl<sub>3</sub>): δ 164.6, 161.2, 142.8, 140.9, 135.6, 129.3, 126.4, 124.6, 120.6, 119.7, 52.4, 52.2.

HRMS (DART): *m/z* calcd for C<sub>12</sub>H<sub>11</sub>O<sub>6</sub> [M+H]<sup>+</sup>: 251.05501. Found: 251.05514.

### General Procedure 3 (GP3) for the Synthesis of Amides **5aa–5ae**

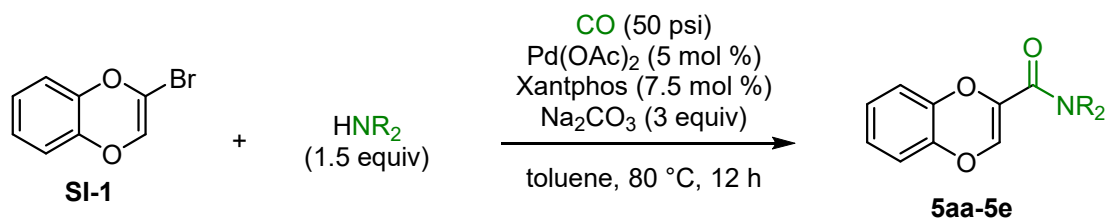

A representative procedure is given for the synthesis of 2-amide-substituted 1,4-benzodioxines: synthesis of **5aa**. A reaction tube was charged with Pd(OAc)<sub>2</sub> (52.8 mg, 0.235 mmol, 0.05 equiv), Xantphos (203.53 mg, 0.35 mmol, 0.075 equiv), 2-bromo-1,4-benzodioxine (1.00 g, 4.69 mmol, 1 equiv), Na<sub>2</sub>CO<sub>3</sub> (1.49 g, 14.1 mmol, 3 equiv), pyrrolidine (501 mg, 7.04 mmol, 1.5 equiv), and toluene (4 mL). The reaction was heated to 80 °C under CO (50 psi) for 12 h in Biotage Endeavor reactor. The reaction was then diluted with EtOAc (20 mL), filtered through a short pad of Celite, concentrated in vacuo, and purified by column chromatography (elution gradient 10–20% EtOAc in hexanes) yielded the title compound as a colorless solid (481 mg, 44% yield).



**Benzo[*b*][1,4]dioxin-2-yl(pyrrolidin-1-yl)methanone (5aa)**

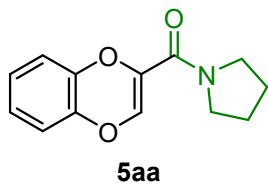

<sup>1</sup>H NMR (500 MHz, CDCl<sub>3</sub>): δ 6.87–6.84 (multiple peaks, 2H), 6.78 (s, 1H), 6.71–6.66 (multiple peaks, 2H), 3.72 (br s, 2H), 3.54 (br s, 2H), 1.91 (br s, 2H), 1.88 (br s, 2H).

<sup>13</sup>C NMR (126 MHz, CDCl<sub>3</sub>): δ 160.5, 142.2, 141.6, 133.4, 133.0, 124.8, 124.6, 116.5, 116.2, 47.7, 47.2, 26.6, 23.5.

HRMS (DART): *m/z* calcd for C<sub>13</sub>H<sub>14</sub>O<sub>3</sub>N [M+H]<sup>+</sup>: 232.09682. Found: 232.09684.

**Benzo[*b*][1,4]dioxin-2-yl(morpholino)methanone (5ab)**

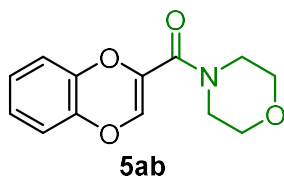

The compound was synthesized using **GP3** with 2-bromo-1,4-benzodioxine (1.00 g, 4.69 mmol, 1 equiv) and morpholine (613 mg, 7.04 mmol, 1.5 equiv). Purification by column chromatography (elution gradient 10–30% EtOAc in hexanes) yielded the title compound as a colorless solid (409 mg, 37% yield).

<sup>1</sup>H NMR (500 MHz, CDCl<sub>3</sub>): δ 6.89–6.86 (multiple peaks, 2H), 6.73–6.66 (multiple peaks, 2H), 6.64 (s, 1H), 3.73–3.66 (multiple peaks, 8H).

<sup>13</sup>C NMR (126 MHz, CDCl<sub>3</sub>): δ 161.6, 141.8, 141.5, 133.1, 132.7, 124.94, 124.88, 116.6, 116.3, 66.9, 42.3.

HRMS (DART): *m/z* calcd for C<sub>13</sub>H<sub>14</sub>O<sub>4</sub>N [M+H]<sup>+</sup>: 248.09173. Found: 248.09180.

**Benzo[*b*][1,4]dioxin-2-yl(piperidin-1-yl)methanone (5ac)**

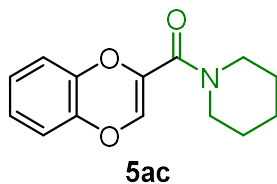

The compound was synthesized using **GP3** with 2-bromo-1,4-benzodioxine (426 mg, 2.00 mmol, 1 equiv) and piperidine (255 mg, 3.00 mmol, 1.5 equiv). Purification by column chromatography (elution gradient 10–20% EtOAc in hexanes) yielded the title compound as a yellow oil (234 mg, 48% yield). NMR spectral data match literature data.<sup>7</sup>

<sup>1</sup>H NMR (500 MHz, CDCl<sub>3</sub>):  $\delta$  6.88–6.85 (multiple peaks, 2H), 6.71–6.67 (multiple peaks, 2H), 6.54 (s, 1H), 3.56 (m, 4H), 1.70–1.58 (multiple peaks, 6H).

<sup>13</sup>C NMR (126 MHz, CDCl<sub>3</sub>):  $\delta$  161.5, 142.1, 141.7, 133.2, 131.9, 124.7, 124.6, 116.5, 116.4, 45.9, 26.1, 24.6.

HRMS (DART):  $m/z$  calcd for C<sub>14</sub>H<sub>16</sub>O<sub>3</sub>N [M+H]<sup>+</sup>: 246.11247. Found: 246.11253.

#### Benzo[*b*][1,4]dioxin-2-yl(4-phenylpiperazin-1-yl)methanone (**5ad**)

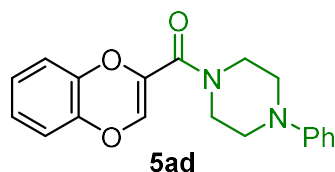

The compound was synthesized using **GP3** with 2-bromo-1,4-benzodioxine (500mg, 2.35mmol, 1 equiv) and 1-phenylpiperazine (571 mg, 3.52 mmol, 1.5 equiv). Purification by column chromatography (elution gradient 10–25% EtOAc in hexanes) yielded the title compound as an off white solid (500 mg, 17% yield).

<sup>1</sup>H NMR (500 MHz, CDCl<sub>3</sub>):  $\delta$  7.29 (t,  $J$  = 7.8 Hz, 2H), 6.96–6.86 (multiple peaks, 5H), 6.73–6.69 (multiple peaks, 2H), 6.65 (s, 1H), 3.82 (t,  $J$  = 5.0 Hz, 4H), 3.23 (t,  $J$  = 5.0 Hz, 4H)

<sup>13</sup>C NMR (126 MHz, CDCl<sub>3</sub>):  $\delta$  161.6, 150.9, 141.9, 141.6, 133.0, 132.8, 129.3, 124.92, 124.85, 120.6, 116.7, 116.6, 116.4, 49.7, 44.6.

HRMS (HESI):  $m/z$  calcd for C<sub>19</sub>H<sub>19</sub>O<sub>3</sub>N<sub>2</sub> [M+H]<sup>+</sup>: 323.13902. Found: 323.13881.

#### Benzo[*b*][1,4]dioxin-2-yl(3,4-dihydroisoquinolin-2(1*H*)-yl)methanone (**5ae**)

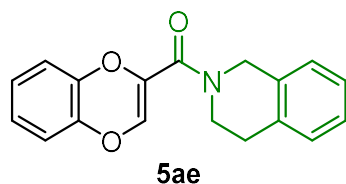

The compound was synthesized using **GP3** with 2-bromo-1,4-benzodioxine (1.00 g, 4.69 mmol, 1 equiv) and tetrahydroisoquinoline (938 mg, 7.04 mmol, 1.5 equiv). Purification by column chromatography

<sup>7</sup> Bozzo, C.; Pujol, M. D.; Solans, X.; Font-Bardia, M. *Tetrahedron* **2003**, *59*, 1227.

(elution gradient 10–20% EtOAc in hexanes) yielded the title compound as a colorless solid (283 mg, 21% yield).

**<sup>1</sup>H NMR** (500 MHz, CDCl<sub>3</sub>):  $\delta$  7.23–7.11 (multiple peaks, 4H), 6.91–6.86 (m, 2H), 6.74–6.70 (m, 2H), 6.65 (s, 1H), 4.76 (s, 2H), 3.86 (t,  $J$  = 5.8 Hz, 2H), 2.96 (t,  $J$  = 5.8 Hz, 2H).

**<sup>13</sup>C NMR** (126 MHz, CDCl<sub>3</sub>):  $\delta$  161.0, 141.0, 140.6, 133.4, 132.0, 131.8, 131.7, 127.7, 125.7, 124.4, 124.3, 123.9, 123.8, 115.5, 115.4, 45.6, 42.2, 28.0.

**HRMS** (DART):  $m/z$  calcd for C<sub>18</sub>H<sub>16</sub>O<sub>3</sub>N [M+H]<sup>+</sup>: 294.11247. Found: 294.11248.

#### IV. Ligand Screening and Synthesis of 6a

##### General Procedure 4 (GP4) for Ligand Screening and Synthesis of 6a

A catalyst solution was prepared in a vial by mixing  $[\text{Ir}(\text{cod})\text{Cl}]_2$  (0.7 mg, 0.001 mmol, 0.01 equiv) and ligand (0.003 mmol, 0.03 equiv) in THF (0.2 mL) for 5 min. Substrate **5a** (23.2 mg, 0.100 mmol, 1 equiv), MeOH (0.2 mL), and AcOH (0.23 mL, 4.0 mmol, 40 equiv) were added to the vial. The mixture was purged with  $\text{N}_2$  three times, followed by  $\text{H}_2$  three times. The reaction was heated to 50 °C under 600 psi  $\text{H}_2$  and stirred for 24 h. Upon completion, the reactor was vented and purged with  $\text{N}_2$  twice. Percentage conversions were determined by HPLC, and enantiomeric ratios were determined by chiral SFC.

**Table S1. Ligand Screening of Ir-Catalyzed Asymmetric Hydrogenation**

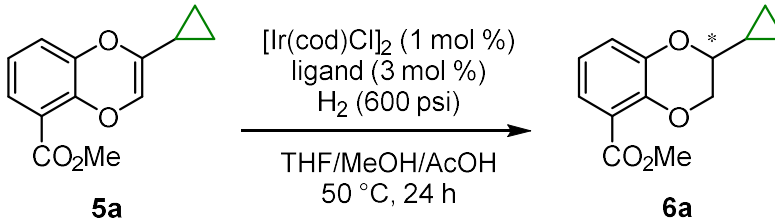

| entry | ligand                       | conv (%) | er    |
|-------|------------------------------|----------|-------|
| 1     | (S)-Phanephos                | 91       | 88:12 |
| 2     | (R)-Ph-Garphos               | 79       | 76:24 |
| 3     | (R)-MeO-BIPHEP               | 88       | 76:24 |
| 4     | (R)-TriOMe-BIPHEP            | 86       | 84:16 |
| 5     | (R)-3,5-t-Bu-MeOBIPHEP       | 93       | 81:19 |
| 6     | (S,S)-Et-FerroTANE           | 79       | 55:45 |
| 7     | (R)-C <sub>3</sub> -TunePhos | 83       | 77:23 |
| 8     | (S)-SEGPPOS                  | 67       | 16:84 |
| 9     | (R)-DM-SEGPPOS               | 90       | 82:18 |
| 10    | (S)-DTBM-SEGPPOS             | 83       | 26:74 |
| 11    | (R)-MP <sub>2</sub> -SEGPPOS | 79       | 45:55 |
| 12    | (R)-BINAP                    | 92       | 81:19 |
| 13    | (R)-H <sub>8</sub> -BINAP    | 95       | 73:27 |
| 14    | (R)-Tol-BINAP                | 94       | 82:18 |
| 15    | (R,R)-DIPAMP                 | 0        | nd    |
| 16    | (R,R,S,S)-DuanPhos           | 63       | 41:59 |
| 17    | (S)-SYNPPOS                  | 88       | 25:75 |
| 18    | (R)-Difluorophos             | 88       | 75:25 |
| 19    | Josiphos SL-J002-1           | 74       | 87:13 |
| 20    | Josiphos SL-J009-1           | 75       | 56:44 |
| 21    | (S,S)-NORPPOS                | 5        | nd    |
| 22    | (S)-BINAPINE                 | 92       | 51:49 |
| 23    | H-BIBOP ( <b>L1</b> )        | 68       | 47:53 |
| 24    | MeO-BIBOP ( <b>L2</b> )      | 94       | 59:41 |
| 25    | Ph-BIBOP ( <b>L3</b> )       | >98      | 66:34 |
| 26    | WingPhos ( <b>L4</b> )       | >98      | 95:5  |
| 27    | BIDIME-dimer ( <b>L5</b> )   | >98      | 97:3  |

### Methyl (*R*)-2-cyclopropyl-2,3-dihydrobenzo[*b*][1,4]dioxine-5-carboxylate (**6a**)

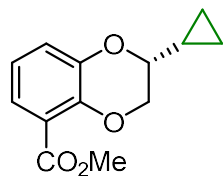

**6a**

97:3 *er*

98% yield

For isolation of Table S1, entry 27, the reaction was concentrated in vacuo, loaded onto silica gel cartridge, and purified by column chromatography (elution gradient 0–10% EtOAc in hexanes) yielded the title compound as a colorless oil (23.0 mg, 98% yield).

<sup>1</sup>H NMR (500 MHz, CDCl<sub>3</sub>):  $\delta$  7.38 (dd,  $J$  = 8.0, 1.6 Hz, 1H), 7.05 (dd,  $J$  = 8.0, 1.6 Hz, 1H), 6.85 (t,  $J$  = 8.0 Hz, 1H), 4.48 (dd,  $J$  = 11.4, 2.3 Hz, 1H), 4.05 (dd,  $J$  = 11.4, 8.5 Hz, 1H), 3.88 (s, 3H), 3.45 (td,  $J$  = 8.5, 2.3 Hz, 1H), 1.00 (m, 1H), 0.73 (m, 1H), 0.64 (m, 1H), 0.57 (m, 1H), 0.39 (m, 1H).

<sup>13</sup>C NMR (126 MHz, CDCl<sub>3</sub>):  $\delta$  166.1, 144.2, 143.8, 123.5, 121.4, 120.5, 119.7, 77.2, 68.2, 52.0, 11.2, 3.0, 1.7.

HRMS (DART):  $m/z$  calcd for C<sub>13</sub>H<sub>15</sub>O<sub>4</sub> [M+H]<sup>+</sup>: 235.09649. Found: 235.09626.

$[\alpha]_D^{24} = +109.0$  ( $c = 1.15$  in CDCl<sub>3</sub>)

The enantiomeric excess was determined by chiral SFC on Phenomenex Lux Cellulose-4 column, 4.6 mm ID x 100 mm L, 5  $\mu$ m particle size. The compounds were eluted with CO<sub>2</sub> (mobile phase A) and methanol (mobile phase B) using a gradient. The gradient used was 1%B to 3%B in 3 min, 3%B to 50%B in 5 min, hold at 50%B for 1 min, then to 1%B in 1 min (analysis time 10 minutes). Column temperature 35 °C; SFC back pressure 150 bar; Flow rate 3.0 mL/min; UV detection at 220 nm;  $t_R$  = 4.1 min (minor), 4.23 min (major); *er* 97.0:3.0.

### Methyl 2-cyclopropyl-2-methoxy-2,3-dihydrobenzo[*b*][1,4]dioxine-5-carboxylate (**7**)

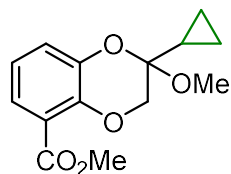

**7**

When the reaction (**GP4**) was run in the absence of acetic acid, a side product **7** was formed. The ratio of **6a** to **7** was 69:31. Compound **7** was isolated as a colorless oil (5.6 mg, 21% yield) after purification by column chromatography (elution gradient 0–10% EtOAc in hexanes).

**<sup>1</sup>H NMR** (500 MHz, CDCl<sub>3</sub>): δ 7.44 (dd, *J* = 8.0, 1.6 Hz, 1H), 7.00 (dd, *J* = 8.0, 1.6 Hz, 1H), 6.86 (t, *J* = 8.0 Hz, 1H), 4.38 (d, *J* = 11.2 Hz, 1H), 3.91 (d, *J* = 11.2 Hz, 1H), 3.87 (s, 3H), 3.39 (s, 3H), 1.09 (m, 1H), 1.00 (m, 1H), 0.68 (m, 1H), 0.52 (m, 1H), 0.30 (m, 1H).

**<sup>13</sup>C NMR** (126 MHz, CDCl<sub>3</sub>): δ 166.1, 143.8, 141.7, 124.4, 121.6, 120.4, 119.6, 94.4, 69.6, 52.0, 49.8, 12.7, 0.6, 0.2.

**HRMS** (DART): *m/z* calcd for C<sub>14</sub>H<sub>17</sub>O<sub>5</sub> [M+H]<sup>+</sup>: 265.10705. Found: 265.10717.

## V. Synthesis of 6b–6ae Using Asymmetric Hydrogenation

### General Procedure 5 (GP5) for Asymmetric Hydrogenation

A catalyst solution was prepared in a vial by mixing [Ir(cod)Cl]<sub>2</sub> (1.3 mg, 0.0020 mmol, 0.01 equiv) and **L5** ligand (4.3 mg, 91.6 wt%, 0.0060 mmol, 0.03 equiv) in THF (0.3 mL) for 5 min. Substrate **5** (0.200 mmol, 1 equiv), MeOH (0.3 mL), and AcOH (0.46 mL, 8.0 mmol, 40 equiv) were added to the vial. The mixture was purged with N<sub>2</sub> three times, followed by H<sub>2</sub> three times. The reaction was heated to 50 °C or 70 °C under 600 psi H<sub>2</sub> and stirred for 24 h. Upon completion, the reactor was vented and purged with N<sub>2</sub> twice. The reaction was concentrated in vacuo, loaded onto silica gel cartridge, and purified by column chromatography. Enantiomeric ratios were determined by chiral SFC or chiral HPLC.

### (*R*)-2-Cyclopropyl-2,3-dihydrobenzo[*b*][1,4]dioxine (**6b**)

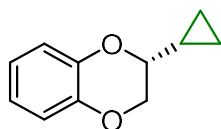

**6b**  
94:6 *er*  
92% yield

The compound was synthesized using **GP5** with **5b** (34.8 mg, 0.200 mmol, 1 equiv) at 50 °C. Purification by column chromatography (elution gradient 0–2% EtOAc in hexanes) yielded the title compound as a white solid (32.4 mg, 92% yield).

**<sup>1</sup>H NMR** (500 MHz, CDCl<sub>3</sub>): δ 6.91–6.78 (multiple peaks, 4H), 4.32 (dd, *J* = 11.2, 2.2 Hz, 1H), 4.00 (dd, *J* = 11.2, 8.4 Hz, 1H), 3.42 (td, *J* = 8.4, 2.2 Hz, 1H), 1.00 (m, 1H), 0.72 (m, 1H), 0.63 (m, 1H), 0.57 (m, 1H), 0.39 (m, 1H).

**<sup>13</sup>C NMR** (126 MHz, CDCl<sub>3</sub>): δ 143.6, 143.2, 121.5, 121.2, 117.3, 117.0, 77.5, 68.0, 11.4, 3.0, 1.7.

**HRMS** (DART): *m/z* calcd for C<sub>11</sub>H<sub>13</sub>O<sub>2</sub> [M+H]<sup>+</sup>: 177.09101. Found: 177.09109.

[α]<sub>D</sub><sup>23</sup> = +77.2 (*c* = 0.16 in CDCl<sub>3</sub>)

The enantiomeric excess was determined by chiral HPLC on CHIRALCEL OJ-3 column, 4.6 mm ID x 150 mm L, 3  $\mu$ m particle size. The compounds were eluted with 99.8% heptane/0.2% isopropanol. Column temperature 20 °C; Flow rate 1.3 mL/min; UV detection at 220 nm;  $t_R$  = 5.94 min (minor), 7.06 min (major); *er* 94.3:5.6

**Methyl (*R*)-2-cyclobutyl-2,3-dihydrobenzo[*b*][1,4]dioxine-5-carboxylate (6c)**

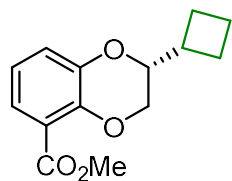

**6c**  
94:6 *er*  
93% yield

The compound was synthesized using **GP5** with **5c** (49.3 mg, 0.200 mmol, 1 equiv) at 50 °C. Purification by column chromatography (5% EtOAc in hexanes) yielded the title compound as a colorless oil (46.3 mg, 93% yield).

**<sup>1</sup>H NMR** (500 MHz, CDCl<sub>3</sub>):  $\delta$  7.38 (dd,  $J$  = 8.0, 1.6 Hz, 1H), 7.04 (dd,  $J$  = 8.0, 1.6 Hz, 1H), 6.85 (t,  $J$  = 8.0 Hz, 1H), 4.32 (dd,  $J$  = 11.3, 2.2 Hz, 1H), 4.09 (td,  $J$  = 8.0, 2.2 Hz, 1H), 3.88 (s, 3H), 3.82 (dd,  $J$  = 11.3, 8.0 Hz, 1H), 2.55 (m, 1H), 2.16–1.87 (multiple peaks, 6H).

**<sup>13</sup>C NMR** (126 MHz, CDCl<sub>3</sub>):  $\delta$  166.1, 144.3, 143.9, 123.4, 121.3, 120.4, 119.7, 75.8, 66.4, 52.0, 35.5, 24.1, 23.5, 18.7.

**HRMS** (DART):  $m/z$  calcd for C<sub>14</sub>H<sub>17</sub>O<sub>4</sub> [M+H]<sup>+</sup>: 249.11214. Found: 249.11218.

$[\alpha]_D^{22} = +107.8$  ( $c$  = 0.21 in CDCl<sub>3</sub>)

The enantiomeric excess was determined by chiral SFC on Phenomenex Lux Cellulose-3 column, 4.6 mm ID x 100 mm L, 5  $\mu$ m particle size. The compounds were eluted with CO<sub>2</sub> (mobile phase A) and methanol (mobile phase B) using a gradient. The gradient used was 1%B to 3%B in 3 min, 3%B to 50%B in 5 min, hold at 50%B for 1 min, then to 1%B in 1 min (analysis time 10 minutes). Column temperature 35 °C; SFC back pressure 150 bar; Flow rate 3.0 mL/min; UV detection at 220 nm;  $t_R$  = 2.02 min (minor), 1.80 min (major); *er* 94.4:5.6

**(R)-2-cyclohexyl-2,3-dihydrobenzo[*b*][1,4]dioxine (6d)**

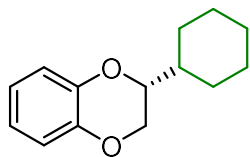

**6d**  
95:5 *er*  
99% yield

The compound was synthesized using **GP5** with **5d** (43.3 mg, 0.200 mmol, 1 equiv) at 50 °C. Purification by column chromatography (elution gradient 0–2% EtOAc in hexanes) yielded the title compound as a white crystalline solid (43.2 mg, 99% yield).

**<sup>1</sup>H NMR** (500 MHz, CDCl<sub>3</sub>): δ 6.88–6.77 (multiple peaks, 4H), 4.26 (dd, *J* = 11.2, 2.0 Hz, 1H), 3.98 (dd, *J* = 11.2, 7.7 Hz, 1H), 3.85 (td, *J* = 7.7, 2.0 Hz, 1H), 2.01 (m, 1H), 1.80–1.61 (multiple peaks, 5H), 1.33–1.10 (multiple peaks, 5H).

**<sup>13</sup>C NMR** (126 MHz, CDCl<sub>3</sub>): δ 143.8, 143.5, 121.3, 121.0, 117.3, 116.9, 77.1, 66.3, 38.9, 28.5, 28.4, 26.3, 25.9, 25.8.

**HRMS** (DART): *m/z* calcd for C<sub>14</sub>H<sub>18</sub>O<sub>2</sub> [M]<sup>+</sup>: 218.13013. Found: 218.13026.

[α]<sub>D</sub><sup>22</sup> = +44.5 (*c* = 0.20 in CDCl<sub>3</sub>)

The enantiomeric excess was determined by chiral HPLC on CHIRALCEL OJ-3 column, 4.6 mm ID x 150 mm L, 3 μm particle size. The compounds were eluted with 99.8% heptane/0.2% isopropanol. Column temperature 20 °C; Flow rate 1.3 mL/min; UV detection at 220 nm; *t*<sub>R</sub> = 4.13 min (minor), 4.41 min (major); *er* 94.9:5.1

**(R)-2-cycloheptyl-2,3-dihydrobenzo[*b*][1,4]dioxine (6e)**

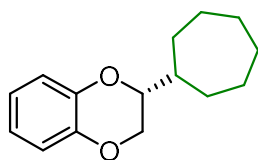

**6e**  
93:7 *er*  
95% yield

The compound was synthesized using **GP5** with **5e** (52.0 mg, 0.227 mmol, 1 equiv) at 50 °C. Purification by column chromatography (elution gradient 0–2% EtOAc in hexanes) yielded the title compound as a colorless oil (49.8 mg, 95% yield).

**<sup>1</sup>H NMR** (500 MHz, CDCl<sub>3</sub>): δ 6.88–6.77 (multiple peaks, 4H), 4.27 (m, 1H), 3.98–3.89 (multiple peaks, 2H), 1.91–1.42 (multiple peaks, 12H), 1.34 (m, 1H).



<sup>13</sup>C NMR (126 MHz, CDCl<sub>3</sub>): δ 143.9, 143.5, 121.3, 121.0, 117.3, 116.8, 77.3, 66.2, 40.5, 29.7, 29.2, 28.5, 28.4, 26.7, 26.5.

HRMS (DART): *m/z* calcd for C<sub>15</sub>H<sub>21</sub>O<sub>2</sub> [M+H]<sup>+</sup>: 233.15361. Found: 233.15382.

[α]<sub>D</sub><sup>22</sup> = +39.9 (*c* = 0.23 in CDCl<sub>3</sub>)

The enantiomeric excess was determined by chiral SFC on Phenomenex Lux Cellulose-3 column, 4.6 mm ID x 100 mm L, 5 μm particle size. The compounds were eluted with CO<sub>2</sub> (mobile phase A) and methanol (mobile phase B) using a gradient. The gradient used was 1%B to 3%B in 3 min, 3%B to 50%B in 5 min, hold at 50%B for 1 min, then to 1%B in 1 min (analysis time 10 minutes). Column temperature 35 °C; SFC back pressure 150 bar; Flow rate 3.0 mL/min; UV detection at 220 nm; *t<sub>R</sub>* = 1.31 min (minor), 1.42 min (major); *er* 93.2:6.8.

**(R)-2-(4-fluorophenyl)-2,3-dihydrobenzo[*b*][1,4]dioxine (6f)**

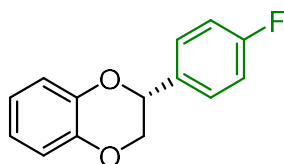

**6f**  
98:2 *er*  
95% yield

The compound was synthesized using **GP5** with **5f** (45.6 mg, 0.200 mmol, 1 equiv) at 50 °C. Purification by column chromatography (elution gradient 0–2% EtOAc in hexanes) yielded the title compound as a colorless oil (43.7 mg, 95% yield). NMR spectral data match literature data.<sup>1</sup>

<sup>1</sup>H NMR (500 MHz, CDCl<sub>3</sub>): δ 7.40 (m, 2H), 7.11 (m, 2H), 7.00–6.87 (multiple peaks, 4H), 5.11 (dd, *J* = 8.8, 2.4 Hz, 1H), 4.33 (dd, *J* = 11.5, 2.4 Hz, 1H), 4.00 (dd, *J* = 11.5, 8.8 Hz, 1H).

<sup>13</sup>C NMR (126 MHz, CDCl<sub>3</sub>): δ 162.9 (d, *J<sub>CF</sub>* = 247 Hz), 143.7, 143.0, 132.3 (d, *J<sub>CF</sub>* = 3.2 Hz), 128.3 (d, *J<sub>CF</sub>* = 8.3 Hz), 121.71, 121.67, 117.5, 117.2, 115.8 (d, *J<sub>CF</sub>* = 21.7 Hz), 74.5, 69.3.

<sup>19</sup>F NMR (471 MHz, CDCl<sub>3</sub>): δ -112.9.

HRMS (DART): *m/z* calcd for C<sub>14</sub>H<sub>11</sub>O<sub>2</sub>F [M]<sup>+</sup>: 230.07376. Found: 230.07393.

[α]<sub>D</sub><sup>24</sup> = -76.6 (*c* = 0.21 in CDCl<sub>3</sub>); [lit<sup>1</sup> [α]<sub>D</sub><sup>25</sup> = -46.72 (*c* = 1.0, CHCl<sub>3</sub>) for 83% ee, (*R*)-isomer]

The enantiomeric excess was determined by chiral SFC on Phenomenex Lux Cellulose-3 column, 4.6 mm ID x 100 mm L, 5 μm particle size. The compounds were eluted with CO<sub>2</sub> (mobile phase A) and methanol (mobile phase B) using a gradient. The gradient used was 1%B to 3%B in 3 min, 3%B to 50%B in 5 min, hold at 50%B for 1 min, then to 1%B in 1 min (analysis time 10 minutes). Column temperature 35 °C; SFC back pressure 150 bar; Flow rate 3.0 mL/min; UV detection at 220 nm; *t<sub>R</sub>* = 1.83 min (minor), 2.05 min (major); *er* 97.9:2.1

**(R)-2-(3,4,5-trimethoxyphenyl)-2,3-dihydrobenzo[*b*][1,4]dioxine (6g)**

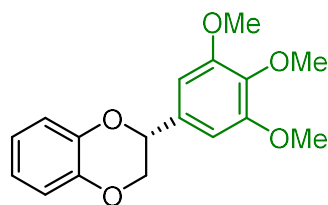

**6g**  
>99:1 *er*  
90% yield

The compound was synthesized using **GP5** with **1g** (60.1 mg, 0.200 mmol, 1 equiv) at 50 °C. Purification by column chromatography (elution gradient 0–10% EtOAc in hexanes) yielded the title compound as a white solid (54.2 mg, 90% yield).

**<sup>1</sup>H NMR** (500 MHz, CDCl<sub>3</sub>): δ 7.00 (m, 1H), 6.94 (m, 1H), 6.91–6.87 (multiple peaks, 2H), 6.64 (s, 2H), 5.05 (dd, *J* = 9.0, 2.2 Hz, 1H), 4.35 (dd, *J* = 11.4, 2.2 Hz, 1H), 4.03 (dd, *J* = 11.4, 9.0 Hz, 1H), 3.89 (s, 6H), 3.86 (s, 3H).

**<sup>13</sup>C NMR** (126 MHz, CDCl<sub>3</sub>): δ 153.6, 143.8, 143.0, 148.4, 142.0, 121.7, 121.6, 117.6, 117.2, 103.6, 75.2, 69.4, 60.9, 56.2.

**HRMS** (DART): *m/z* calcd for C<sub>17</sub>H<sub>19</sub>O<sub>5</sub> [M+H]<sup>+</sup>: 303.12270. Found: 303.12278.

[α]<sub>D</sub><sup>22</sup> = -59.4 (*c* = 0.16 in CDCl<sub>3</sub>)

The enantiomeric excess was determined by chiral SFC on ChromegaChiral CCA column, 4.6 mm ID x 100 mm L, 5 μm particle size. The compounds were eluted with CO<sub>2</sub> (mobile phase A) and methanol (mobile phase B) using a gradient. The gradient used was 1%B to 3%B in 3 min, 3%B to 50%B in 5 min, hold at 50%B for 1 min, then to 1%B in 1 min (analysis time 10 minutes). Column temperature 35 °C; SFC back pressure 150 bar; Flow rate 3.0 mL/min; UV detection at 220 nm; *t*<sub>R</sub> = 3.98 min (minor), 4.33 min (major); *er* 99.2:0.8

**(R)-2-ethyl-2,3-dihydrobenzo[*b*][1,4]dioxine (6h)**

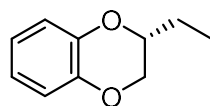

**6h**  
90.1:9.9 *er*  
92% yield

The title compound was synthesized using **GP5** with **5h** (191 mg, 86wt%, net weight 164 mg, 1.0 mmol, 1 equiv). The reaction was run with [Ir(cod)Cl]<sub>2</sub> (6.5 mg, 0.01 mmol, 0.01 equiv) and **L5** ligand (21.5 mg, 91.6 wt%, 0.03 mmol, 0.03 equiv) in THF (1.0 mL) and MeOH (1.0 mL) at 25 °C and 600 psi H<sub>2</sub> for 24 h. Product was purified on silica with hexanes to yield colorless liquid after dryness, 151 mg, 92% yield. NMR spectral data match literature data.<sup>1</sup>

<sup>1</sup>H NMR (400 MHz, CD<sub>2</sub>Cl<sub>2</sub>): δ 6.91–6.80 (multiple peaks, 4H), 4.25 (dd, *J* = 11.2, 2.1 Hz, 1H), 4.05 (m, 1H), 3.89 (dd, *J* = 11.2, 7.9 Hz, 1H), 1.81–1.60 (multiple peaks, 2H), 1.10 (t, *J* = 7.5 Hz, 3H).

<sup>13</sup>C NMR (100 MHz, CD<sub>2</sub>Cl<sub>2</sub>): δ 144.1, 143.9, 121.7, 121.4, 117.6, 117.3, 74.8, 68.3, 24.6, 9.6.

The enantiomeric excess was determined by chiral HPLC on CHIRALCEL OJ-3 column, 4.6 mm ID x 150 mm L, 3 μm particle size. The product was purified with 100% heptane (des-Br impurity elutes later than the product). Column temperature 20 °C; Flow rate 1.3 mL/min; UV detection at 220 nm; *t*<sub>R</sub> = 5.67 min (major), 6.56 min (major); *er* 90.1:9.9

### Methyl 2-cyclopropyl-2-methoxy-2,3-dihydrobenzo[*b*][1,4]dioxine-5-carboxylate (7)

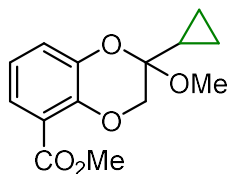

**7**

When the reaction (**GP4**) was run in the absence of acetic acid, a side product **7** was formed. The ratio of **6a** to **7** was 69:31. Compound **7** was isolated as a colorless oil (5.6 mg, 21% yield) after purification by column chromatography (elution gradient 0–10% EtOAc in hexanes).

<sup>1</sup>H NMR (500 MHz, CDCl<sub>3</sub>): δ 7.44 (dd, *J* = 8.0, 1.6 Hz, 1H), 7.00 (dd, *J* = 8.0, 1.6 Hz, 1H), 6.86 (t, *J* = 8.0 Hz, 1H), 4.38 (d, *J* = 11.2 Hz, 1H), 3.91 (d, *J* = 11.2 Hz, 1H), 3.87 (s, 3H), 3.39 (s, 3H), 1.09 (m, 1H), 1.00 (m, 1H), 0.68 (m, 1H), 0.52 (m, 1H), 0.30 (m, 1H).

<sup>13</sup>C NMR (126 MHz, CDCl<sub>3</sub>): δ 166.1, 143.8, 141.7, 124.4, 121.6, 120.4, 119.6, 94.4, 69.6, 52.0, 49.8, 12.7, 0.6, 0.2.

HRMS (DART): *m/z* calcd for C<sub>14</sub>H<sub>17</sub>O<sub>5</sub> [M+H]<sup>+</sup>: 265.10705. Found: 265.10717.

### (*R*)-2-(benzo[*d*][1,3]dioxol-5-yl)-2,3-dihydrobenzo[*b*][1,4]dioxine (**6i**)

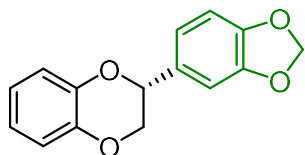

**6i**

98:2 *er*  
96% yield

The compound was synthesized using **GP5** with **5i** (50.8 mg, 0.200 mmol, 1 equiv) at 50 °C. Purification by column chromatography (elution gradient 0–5% EtOAc in hexanes) yielded the title compound as a colorless oil (49.1 mg, 96% yield).

**<sup>1</sup>H NMR** (500 MHz, CD<sub>3</sub>CN): δ 6.96–6.85 (multiple peaks, 7H), 5.98 (s, 2H), 5.08 (dd, *J* = 8.5, 2.3 Hz, 1H), 4.33 (dd, *J* = 11.5, 2.3 Hz, 1H), 4.03 (dd, *J* = 11.5, 8.5 Hz, 1H).

**<sup>13</sup>C NMR** (126 MHz, CD<sub>3</sub>CN): δ 149.1, 149.0, 145.0, 144.2, 131.7, 122.5, 122.5, 121.5, 118.3, 118.0, 198.2, 108.0, 102.7, 75.7, 69.8.

**HRMS** (DART): *m/z* calcd for C<sub>15</sub>H<sub>13</sub>O<sub>4</sub> [M+H]<sup>+</sup>: 257.08084. Found: 257.08090.

[α]<sub>D</sub><sup>26</sup> = -67.1 (*c* = 0.16 in CDCl<sub>3</sub>)

The enantiomeric excess was determined by chiral SFC on Phenomenex Lux Cellulose-3 column, 4.6 mm ID x 100 mm L, 5 μm particle size. The compounds were eluted with CO<sub>2</sub> (mobile phase A) and methanol (mobile phase B) using a gradient. The gradient used was 1%B to 3%B in 3 min, 3%B to 50%B in 5 min, hold at 50%B for 1 min, then to 1%B in 1 min (analysis time 10 minutes). Column temperature 35 °C; SFC back pressure 150 bar; Flow rate 3.0 mL/min; UV detection at 220 nm; *t<sub>R</sub>* = 2.69 min (minor), 2.86 min (major); *er* 97.7:2.3.

**Methyl (*R*)-2-(2,2-difluorobenzo[*d*][1,3]dioxol-5-yl)-2,3-dihydrobenzo[*b*][1,4]dioxine-5-carboxylate (6j)**

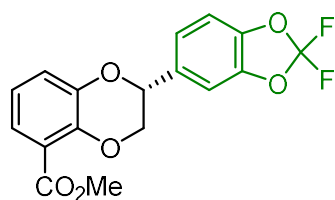

**6j**  
94:6 *er*  
90% yield

The compound was synthesized using **GP5** with **5j** (69.7 mg, 0.200 mmol, 1 equiv) at 50 °C. Purification by column chromatography (elution gradient 0–5% EtOAc in hexanes) yielded the title compound as a white solid (63.1 mg, 90% yield).

**<sup>1</sup>H NMR** (500 MHz, CDCl<sub>3</sub>): δ 7.47 (dd, *J* = 7.8, 1.4 Hz, 1H), 7.17–7.10 (m, 4H), 6.92 (t, *J* = 7.8 Hz, 1H), 5.16 (dd, *J* = 8.9, 2.3 Hz, 1H), 4.51 (dd, *J* = 11.5, 2.3 Hz, 1H), 4.00 (dd, *J* = 11.5, 8.9 Hz, 1H), 3.90 (s, 3H).

**<sup>13</sup>C NMR** (126 MHz, CDCl<sub>3</sub>): δ 165.9, 144.2, 144.1, 144.0, 143.3, 132.2, 131.7 (t, *J*<sub>CF</sub> = 18 Hz), 124.2, 122.0, 121.6, 120.8, 120.0, 109.7, 107.9, 74.0, 69.4, 52.1.

**<sup>19</sup>F NMR** (471 MHz, CDCl<sub>3</sub>): δ -49.85, -49.89.

**HRMS** (DART): *m/z* calcd for C<sub>17</sub>H<sub>13</sub>O<sub>6</sub>F [M+H]<sup>+</sup>: 351.06747. Found: 351.06749.

[α]<sub>D</sub><sup>26</sup> = -2.5 (*c* = 0.20 in CDCl<sub>3</sub>)

The enantiomeric excess was determined by chiral SFC on Phenomenex Lux Cellulose-3 column, 4.6 mm ID x 100 mm L, 5  $\mu$ m particle size. The compounds were eluted with CO<sub>2</sub> (mobile phase A) and methanol (mobile phase B) using a gradient. The gradient used was 1%B to 3%B in 3 min, 3%B to 50%B in 5 min, hold at 50%B for 1 min, then to 1%B in 1 min (analysis time 10 minutes). Column temperature 35 °C; SFC back pressure 150 bar; Flow rate 3.0 mL/min; UV detection at 220 nm;  $t_R$  = 2.02 min (minor), 1.80 min (major); *er* 94.4:5.6.

**(R)-2-(benzo[b]thiophen-3-yl)-2,3-dihydrobenzo[b][1,4]dioxine (6k)**

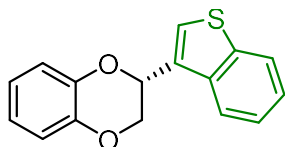

**6k**  
99:1 *er*  
95% yield

The compound was synthesized using **GP5** with **5k** (53.3 mg, 0.200 mmol, 1 equiv) at 50 °C. Purification by column chromatography (elution gradient 0–5% EtOAc in hexanes) yielded the title compound as a white solid (51.0 mg, 95% yield).

**<sup>1</sup>H NMR** (500 MHz, CDCl<sub>3</sub>):  $\delta$  7.91–7.86 (multiple peaks, 2H), 7.57 (s, 1H), 7.45–7.37 (multiple peaks, 2H), 7.01–6.95 (multiple peaks, 2H), 6.93–6.88 (multiple peaks, 2H), 5.57 (dd,  $J$  = 8.3, 2.5 Hz, 1H), 4.54 (dd,  $J$  = 11.5, 2.5 Hz, 1H), 4.26 (dd,  $J$  = 11.5, 8.3 Hz, 1H).

**<sup>13</sup>C NMR** (126 MHz, CDCl<sub>3</sub>):  $\delta$  143.6, 143.1, 140.7, 137.0, 131.3, 124.82, 124.79, 124.5, 123.1, 121.8, 121.8, 121.7, 117.6, 117.2, 71.1, 68.1.

**HRMS** (DART):  $m/z$  calcd for C<sub>16</sub>H<sub>13</sub>O<sub>2</sub>S [M+H]<sup>+</sup>: 269.06308. Found: 269.06327.

$[\alpha]_D^{25}$  = -68.0 ( $c$  = 0.20 in CDCl<sub>3</sub>)

The enantiomeric excess was determined by chiral SFC on Phenomenex Lux Cellulose-3 column, 4.6 mm ID x 100 mm L, 5  $\mu$ m particle size. The compounds were eluted with CO<sub>2</sub> (mobile phase A) and methanol (mobile phase B) using a gradient. The gradient used was 1%B to 3%B in 3 min, 3%B to 50%B in 5 min, hold at 50%B for 1 min, then to 1%B in 1 min (analysis time 10 minutes). Column temperature 35 °C; SFC back pressure 150 bar; Flow rate 3.0 mL/min; UV detection at 220 nm;  $t_R$  = 4.54 min (minor), 5.34 min (major); *er* 99.1:0.9

**Methyl (*R*)-2-(dibenzo[*b,d*]furan-4-yl)-2,3-dihydrobenzo[*b*][1,4]dioxine-5-carboxylate (**6l**)**

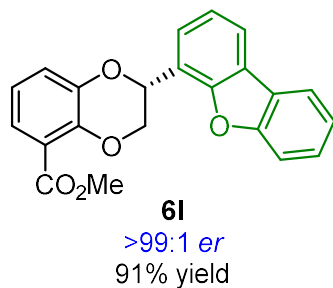

The compound was synthesized using **GP5** with **5l** (71.7 mg, 0.200 mmol, 1 equiv) at 70 °C. Purification by column chromatography (8% EtOAc in hexanes) yielded the title compound as a white solid (65.7 mg, 91% yield).

**<sup>1</sup>H NMR** (500 MHz, CDCl<sub>3</sub>): δ 8.19–8.17 (m, 2H), 7.89–7.86 (m, 1H), 7.56–7.46 (m, 5H), 7.24 (dd, *J* = 8.1, 1.4 Hz, 1H), 6.96 (t, *J* = 8.0 Hz, 1H), 5.55 (dd, *J* = 9.1, 2.4 Hz, 1H), 4.70 (dd, *J* = 11.6, 2.6 Hz, 1H), 4.27 (dd, *J* = 11.6, 9.2 Hz, 1H), 3.93 (s, 3H).

**<sup>13</sup>C NMR** (125 MHz, CDCl<sub>3</sub>): δ 166.0, 144.1, 143.6, 139.3, 137.3, 136.7, 135.2, 130.3, 125.0, 124.7, 124.6, 124.2, 122.8, 122.1, 121.7, 120.8, 120.0, 74.2, 67.7, 52.2.

**HRMS** (DART): *m/z* calcd for C<sub>22</sub>H<sub>17</sub>O<sub>5</sub> [M+H]<sup>+</sup>: 361.10705. Found: 361.10700.

[α]<sub>D</sub><sup>22</sup> = -116.0 (*c* = 0.10 in CDCl<sub>3</sub>)

The enantiomeric excess was determined by chiral SFC on Phenomenex Lux Cellulose-3 column, 4.6 mm ID x 100 mm L, 5 μm particle size. The compounds were eluted with CO<sub>2</sub> (mobile phase A) and methanol (mobile phase B) using a gradient. The gradient used was 1%B to 3%B in 3 min, 3%B to 50%B in 5 min, hold at 50%B for 1 min, then to 1%B in 1 min (analysis time 10 minutes). Column temperature 35 °C; SFC back pressure 150 bar; Flow rate 3.0 mL/min; UV detection at 220 nm; *t*<sub>R</sub> = 5.74 min (minor), 5.98 min (major); *er* 99.5:0.5

**Methyl (*R*)-2-(dibenzo[*b,d*]thiophen-4-yl)-2,3-dihydrobenzo[*b*][1,4]dioxine-5-carboxylate (**6m**)**

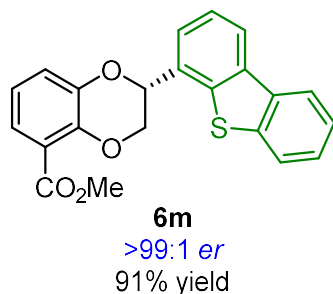

The compound was synthesized using **GP5** with **5m** (74.9 mg, 0.200 mmol, 1 equiv) at 70 °C. Purification by column chromatography (6% EtOAc in hexanes) yielded the title compound as a white solid (68.4 mg, 91% yield).

**<sup>1</sup>H NMR** (500 MHz, CDCl<sub>3</sub>): δ 7.97 (d, *J* = 7.7 Hz, 2H), 7.61–7.57 (m, 2H), 7.50–7.47 (m, 2H), 7.41 (t, *J* = 7.6 Hz, 1H), 7.37 (t, *J* = 7.4 Hz, 1H), 7.24 (1d, *J* = 8.0, 1.4 Hz, 1H), 6.94 (t, *J* = 7.9 Hz, 1H), 5.85 (dd, *J* = 8.7, 2.4 Hz, 1H), 4.83 (dd, *J* = 11.5, 2.4 Hz, 1H), 4.29 (dd, *J* = 11.4, 8.8 Hz, 1H), 3.92 (s, 3H).

**<sup>13</sup>C NMR** (125 MHz, CDCl<sub>3</sub>): δ 166.1, 156.1, 153.0, 144.4, 143.7, 127.6, 124.63, 124.60, 124.0, 123.9, 123.2, 123.1, 121.7, 121.0, 120.8, 120.6, 120.1, 120.0, 111.9, 70.5, 68.2, 52.1.

**HRMS** (DART): *m/z* calcd for C<sub>22</sub>H<sub>17</sub>O<sub>4</sub>S [M+H]<sup>+</sup>: 377.08421. Found: 377.08442.

[α]<sub>D</sub><sup>22</sup> = -125.0 (*c* = 0.10 in CDCl<sub>3</sub>)

The enantiomeric excess was determined by chiral SFC on ChromegaChiral CCC column, 4.6 mm ID x 100 mm L, 5 μm particle size. The compounds were eluted with CO<sub>2</sub> (mobile phase A) and methanol (mobile phase B) using a gradient. The gradient used was 1%B to 3%B in 3 min, 3%B to 50%B in 5 min, hold at 50%B for 1 min, then to 1%B in 1 min (analysis time 10 minutes). Column temperature 35 °C; SFC back pressure 150 bar; Flow rate 3.0 mL/min; UV detection at 220 nm; *t*<sub>R</sub> = 6.75 min (minor), 7.52 min (major); *er* 99.5:0.5

**(*R*)-5-(2,3-dihydrobenzo[*b*][1,4]dioxin-2-yl)-1-methyl-1*H*-pyrazole (6n)**

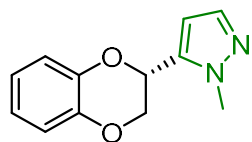

**6n**  
98:2 *er*  
93% yield

The compound was synthesized using **GP5** with **5n** (42.8 mg, 0.200 mmol, 1 equiv) at 70 °C. Purification by column chromatography (20% EtOAc in hexanes) yielded the title compound as a white solid (40.3 mg, 93% yield).

**<sup>1</sup>H NMR** (500 MHz, CDCl<sub>3</sub>): δ 7.46 (d, *J* = 2.0 Hz, 1H), 6.95–6.85 (multiple peaks, 4H), 6.32 (d, *J* = 2.0 Hz, 1H), 5.27 (dd, *J* = 7.6, 2.5 Hz, 1H), 4.47 (dd, *J* = 11.5, 2.5 Hz, 1H), 4.34 (dd, *J* = 11.5, 7.6 Hz, 1H), 4.00 (s, 3H).

**<sup>13</sup>C NMR** (126 MHz, CDCl<sub>3</sub>): δ 142.8, 142.6, 138.5, 137.0, 122.1, 121.9, 117.5, 117.3, 105.1, 66.8, 66.2, 37.2.

**HRMS** (DART): *m/z* calcd for C<sub>12</sub>H<sub>13</sub>O<sub>2</sub>N<sub>2</sub> [M+H]<sup>+</sup>: 217.09715. Found: 217.09717.

[α]<sub>D</sub><sup>23</sup> = +111.6 (*c* = 0.18 in CDCl<sub>3</sub>)

The enantiomeric excess was determined by chiral SFC on Phenomenex Lux Cellulose-2 column, 4.6 mm ID x 100 mm L, 5 μm particle size. The compounds were eluted with CO<sub>2</sub> (mobile phase A) and methanol (mobile phase B) using a gradient. The gradient used was 1%B to 3%B in 3 min, 3%B to 50%B in 5 min, hold at 50%B for 1 min, then to 1%B in 1 min (analysis time 10 minutes). Column temperature 35 °C;

SFC back pressure 150 bar; Flow rate 3.0 mL/min; UV detection at 220 nm;  $t_R$  = 4.04 min (minor), 4.76 min (major); *er* 97.6:2.4

**(R)-7-(2,3-Dihydrobenzo[*b*][1,4]dioxin-2-yl)-1-methyl-1*H*-indazole (6o)**

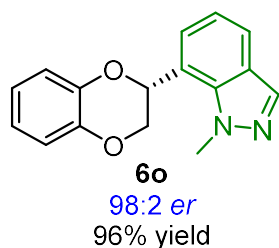

The compound was synthesized using **GP5** with **5o** (52.9 mg, 0.200 mmol, 1 equiv) at 70 °C. Purification by column chromatography (10% EtOAc in hexanes) yielded the title compound as a white solid (51.2 mg, 96% yield).

**<sup>1</sup>H NMR** (500 MHz, CDCl<sub>3</sub>):  $\delta$  8.12 (s, 1H), 7.45–7.40 (multiple peaks, 2H), 7.24 (m, 1H), 7.04 (m, 1H), 6.97 (m, 1H), 6.94–6.90 (multiple peaks, 2H), 5.54 (dd,  $J$  = 8.9, 2.0 Hz, 1H), 4.47 (dd,  $J$  = 11.5, 2.0 Hz, 1H), 4.23 (dd,  $J$  = 11.5, 8.9 Hz, 1H), 4.11 (s, 3H).

**<sup>13</sup>C NMR** (126 MHz, CDCl<sub>3</sub>):  $\delta$  143.7, 143.2, 140.3, 131.3, 129.6, 126.3, 121.79, 121.78, 121.75, 118.4, 117.6, 117.2, 109.5, 74.4, 68.8, 35.7.

**HRMS** (DART):  $m/z$  calcd for C<sub>16</sub>H<sub>15</sub>O<sub>2</sub>N<sub>2</sub> [M+H]<sup>+</sup>: 267.11280. Found: 267.11278.

$[\alpha]_D^{24}$  = -117.3 ( $c$  = 0.21 in CDCl<sub>3</sub>)

The enantiomeric excess was determined by chiral SFC on ChromegaChiral CCA column, 4.6 mm ID x 100 mm L, 5  $\mu$ m particle size. The compounds were eluted with CO<sub>2</sub> (mobile phase A) and methanol (mobile phase B) using a gradient. The gradient used was 1%B to 3%B in 3 min, 3%B to 50%B in 5 min, hold at 50%B for 1 min, then to 1%B in 1 min (analysis time 10 minutes). Column temperature 35 °C; SFC back pressure 150 bar; Flow rate 3.0 mL/min; UV detection at 220 nm;  $t_R$  = 5.06 min (minor), 5.44 min (major); *er* 98.3:1.7

**(R)-4-(2,3-Dihydrobenzo[*b*][1,4]dioxin-2-yl)-3,5-dimethylisoxazole (6p)**

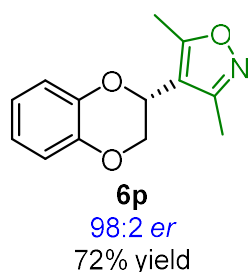



The compound was synthesized using **GP5** with **5p** (45.8 mg, 0.200 mmol, 1 equiv) at 50 °C. Purification by column chromatography (5% EtOAc in hexanes) yielded the title compound as a white solid (33.5 mg, 72% yield).

**<sup>1</sup>H NMR** (500 MHz, CDCl<sub>3</sub>): δ 6.96–6.86 (multiple peaks, 4H), 5.05 (dd, *J* = 9.4, 2.6 Hz, 1H), 4.23 (dd, *J* = 11.5, 2.6 Hz, 1H), 4.15 (dd, *J* = 11.5, 9.4 Hz, 1H), 2.45 (s, 3H), 2.31 (s, 3H).

**<sup>13</sup>C NMR** (126 MHz, CDCl<sub>3</sub>): δ 167.6, 158.6, 143.3, 142.7, 122.0, 121.9, 117.4, 117.3, 109.8, 67.9, 66.9, 11.7, 10.7.

**HRMS** (DART): *m/z* calcd for C<sub>13</sub>H<sub>14</sub>O<sub>3</sub>N [M+H]<sup>+</sup>: 232.09682. Found: 232.09691.

[α]<sub>D</sub><sup>23</sup> = -49.0 (*c* = 0.21 in CDCl<sub>3</sub>)

The enantiomeric excess was determined by chiral SFC on Phenomenex Lux Cellulose-4 column, 4.6 mm ID x 100 mm L, 5 μm particle size. The compounds were eluted with CO<sub>2</sub> (mobile phase A) and methanol (mobile phase B) using a gradient. The gradient used was 1%B to 3%B in 3 min, 3%B to 50%B in 5 min, hold at 50%B for 1 min, then to 1%B in 1 min (analysis time 10 minutes). Column temperature 35 °C; SFC back pressure 150 bar; Flow rate 3.0 mL/min; UV detection at 220 nm; *t<sub>R</sub>* = 2.97 min (minor), 2.77 min (major); *er* 97.7:2.3

#### (*R*)-5-(2,3-Dihydrobenzo[*b*][1,4]dioxin-2-yl)-2-fluoropyridine (**6q**)

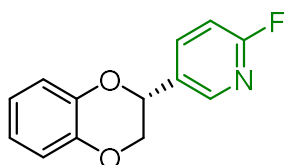

**6q**  
98:2 *er*  
82% yield

The compound was synthesized using **GP5** with **5q** (45.8 mg, 0.200 mmol, 1 equiv) at 50 °C. Purification by column chromatography (elution gradient 0–10% EtOAc in hexanes) yielded the title compound as a white solid (38.0 mg, 82% yield).

**<sup>1</sup>H NMR** (500 MHz, CDCl<sub>3</sub>): δ 8.47 (d, *J* = 2.3 Hz, 1H), 7.74 (dd, *J* = 8.3, 2.3 Hz, 1H), 7.39 (d, *J* = 8.3 Hz, 1H), 7.00–6.88 (multiple peaks, 4H), 5.19 (dd, *J* = 8.5, 2.3 Hz, 1H), 4.37 (dd, *J* = 11.5, 2.3 Hz, 1H), 4.04 (dd, *J* = 11.5, 8.5 Hz, 1H).

**<sup>13</sup>C NMR** (126 MHz, CDCl<sub>3</sub>): δ 163.8 (d, *J*<sub>CF</sub> = 241 Hz), 146.2 (d, *J*<sub>CF</sub> = 15.3 Hz), 143.2, 142.8, 139.5 (d, *J*<sub>CF</sub> = 8.2 Hz), 130.1 (d, *J*<sub>CF</sub> = 4.6 Hz), 122.1, 121.9, 117.5, 117.3, 109.9 (d, *J*<sub>CF</sub> = 37.6 Hz), 72.3 (d, *J*<sub>CF</sub> = 1.5 Hz), 68.7 (d, *J*<sub>CF</sub> = 1.2 Hz).

**<sup>19</sup>F NMR** (471 MHz, CDCl<sub>3</sub>): δ -67.6.

**HRMS** (DART): *m/z* calcd for C<sub>13</sub>H<sub>11</sub>O<sub>2</sub>NF [M+H]<sup>+</sup>: 232.07683. Found: 232.07688.

$[\alpha]_D^{23} = -81.8$  ( $c = 0.24$  in  $\text{CDCl}_3$ )

The enantiomeric excess was determined by chiral SFC on Phenomenex Lux Cellulose-3 column, 4.6 mm ID x 100 mm L, 5  $\mu\text{m}$  particle size. The compounds were eluted with  $\text{CO}_2$  (mobile phase A) and methanol (mobile phase B) using a gradient. The gradient used was 1%B to 3%B in 3 min, 3%B to 50%B in 5 min, hold at 50%B for 1 min, then to 1%B in 1 min (analysis time 10 minutes). Column temperature 35  $^\circ\text{C}$ ; SFC back pressure 150 bar; Flow rate 3.0 mL/min; UV detection at 220 nm;  $t_R = 2.26$  min (minor), 2.48 min (major); *er* 98.1:1.9.

**(R)-2-Chloro-5-(2,3-dihydrobenzo[b][1,4]dioxin-2-yl)pyridine (6r)**

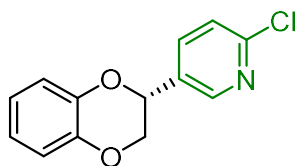

**6r**  
99:1 *er*  
94% yield

The compound was synthesized using **GP5** with **5r** (49.1 mg, 0.200 mmol, 1 equiv) at 70  $^\circ\text{C}$ . Purification by column chromatography (elution gradient 0–10% EtOAc in hexanes) yielded the title compound as a white solid (46.4 mg, 94% yield).

**$^1\text{H}$  NMR** (500 MHz,  $\text{CDCl}_3$ ):  $\delta$  8.47 (d,  $J = 2.3$  Hz, 1H), 7.74 (dd,  $J = 8.3, 2.3$  Hz, 1H), 7.39 (d,  $J = 8.3$  Hz, 1H), 7.00–6.88 (multiple peaks, 4H), 5.19 (dd,  $J = 8.5, 2.3$  Hz, 1H), 4.37 (dd,  $J = 11.5, 2.3$  Hz, 1H), 4.04 (dd,  $J = 11.5, 8.5$  Hz, 1H).

**$^{13}\text{C}$  NMR** (126 MHz,  $\text{CDCl}_3$ ):  $\delta$  152.0, 148.0, 143.1, 142.8, 137.0, 131.3, 124.5, 122.1, 121.9, 117.5, 117.3, 72.3, 68.6.

**HRMS** (DART):  $m/z$  calcd for  $\text{C}_{13}\text{H}_{11}\text{O}_2\text{NCl}$   $[\text{M}+\text{H}]^+$ : 248.04728. Found: 248.04731.

$[\alpha]_D^{24} = -85.6$  ( $c = 0.22$  in  $\text{CDCl}_3$ )

The enantiomeric excess was determined by chiral SFC on ChromegaChiral CCA column, 4.6 mm ID x 100 mm L, 5  $\mu\text{m}$  particle size. The compounds were eluted with  $\text{CO}_2$  (mobile phase A) and methanol (mobile phase B) using a gradient. The gradient used was 1%B to 3%B in 3 min, 3%B to 50%B in 5 min, hold at 50%B for 1 min, then to 1%B in 1 min (analysis time 10 minutes). Column temperature 35  $^\circ\text{C}$ ; SFC back pressure 150 bar; Flow rate 3.0 mL/min; UV detection at 220 nm;  $t_R = 4.79$  min (minor), 5.56 min (major); *er* 98.8:1.2.

**Methyl (*R*)-2-(6-(trifluoromethyl)pyridin-3-yl)-2,3-dihydrobenzo[*b*][1,4]dioxine-5-carboxylate (**6s**)**

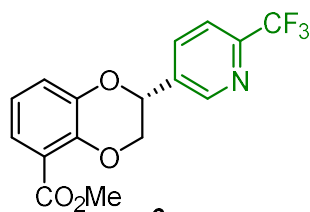

**6s**  
99:1 *er*  
99% yield

The compound was synthesized using **GP5** with **5s** (67.5 mg, 0.200 mmol, 1 equiv) at 70 °C. Purification by column chromatography (15% EtOAc in hexanes) yielded the title compound as a white solid (quantitative yield).

**<sup>1</sup>H NMR** (500 MHz, CDCl<sub>3</sub>): δ 8.80 (s, 1H), 7.97 (dd, *J* = 8.3, 1.7 Hz, 1H), 7.77 (d, *J* = 8.1 Hz, 1H), 7.50 (dd, *J* = 7.8, 1.4 Hz, 1H), 7.17 (dd, *J* = 8.1, 1.4 Hz, 1H), 6.95 (t, *J* = 7.9 Hz, 1H), 5.34 (dd, *J* = 8.5, 1.9 Hz, 1H), 4.59 (dd, *J* = 11.6, 2.4 Hz, 1H), 4.11 (dd, *J* = 11.6, 8.5 Hz, 1H), 3.91 (s, 3H).

**<sup>13</sup>C NMR** (125 MHz, CDCl<sub>3</sub>): δ 165.7, 148.7 (q, *J*<sub>CF</sub> = 36.6 Hz), 148.2, 143.5, 143.2, 135.5, 135.0 (q, *J*<sub>CF</sub> = 0.96 Hz), 124.6, 121.6, 121.3 (q, *J*<sub>CF</sub> = 273 Hz), 121.0, 120.6 (q, *J*<sub>CF</sub> = 2.7 Hz), 120.2, 72.1, 68.7, 52.2.

**<sup>19</sup>F NMR** (471 MHz, CDCl<sub>3</sub>): δ -68.0.

**HRMS** (DART): *m/z* calcd for C<sub>16</sub>H<sub>13</sub>O<sub>4</sub>NF<sub>3</sub> [M+H]<sup>+</sup>: 340.07912. Found: 340.07913.

[α]<sub>D</sub><sup>24</sup> = -17.5 (*c* = 0.10 in CDCl<sub>3</sub>)

The enantiomeric excess was determined by chiral SFC on Phenomenex Lux Cellulose-4 column, 4.6 mm ID x 100 mm L, 5 μm particle size. The compounds were eluted with CO<sub>2</sub> (mobile phase A) and methanol (mobile phase B) using a gradient. The gradient used was 1%B to 3%B in 3 min, 3%B to 50%B in 5 min, hold at 50%B for 1 min, then to 1%B in 1 min (analysis time 10 minutes). Column temperature 35 °C; SFC back pressure 150 bar; Flow rate 3.0 mL/min; UV detection at 220 nm; *t*<sub>R</sub> = 5.06 min (minor), 5.35 min (major); *er* 99.1:0.9

**(*R*)-5-(2,3-Dihydrobenzo[*b*][1,4]dioxin-2-yl)-2-(trifluoromethyl)pyridine (**6t**)**

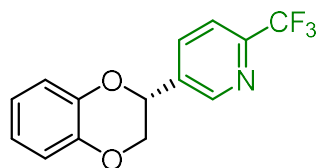

**6t**  
99:1 *er*  
96% yield

The compound was synthesized using **GP5** with **5t** (55.8 mg, 0.200 mmol, 1 equiv) at 70 °C. Purification by column chromatography (elution gradient 0–8% EtOAc in hexanes) yielded the title compound as a white solid (54.2 mg, 96% yield).

**<sup>1</sup>H NMR** (500 MHz, CDCl<sub>3</sub>): δ 8.80 (s, 1H), 7.97 (d, *J* = 7.8 Hz, 1H), 7.75 (d, *J* = 8.1 Hz, 1H), 7.02–6.90 (multiple peaks, 4H), 5.30 (dd, *J* = 8.3, 2.1 Hz, 1H), 4.42 (dd, *J* = 11.6, 2.1 Hz, 1H), 4.07 (dd, *J* = 11.6, 8.3 Hz, 1H).

**<sup>13</sup>C NMR** (126 MHz, CDCl<sub>3</sub>): δ 148.5 (q, *J*<sub>CF</sub> = 35.0 Hz), 148.3, 143.0, 142.8, 135.5 (two overlapping peaks), 122.2, 122.1, 121.4 (q, *J*<sub>CF</sub> = 274 Hz), 120.5 (q, *J*<sub>CF</sub> = 2.7 Hz), 117.5, 117.4, 72.5, 68.5.

**<sup>19</sup>F NMR** (471 MHz, CDCl<sub>3</sub>): δ -68.0.

**HRMS** (DART): *m/z* calcd for C<sub>14</sub>H<sub>11</sub>O<sub>2</sub>NF<sub>3</sub> [M+H]<sup>+</sup>: 282.07364. Found: 282.07362.

[α]<sub>D</sub><sup>24</sup> = -91.3 (*c* = 0.27 in CDCl<sub>3</sub>)

The enantiomeric excess was determined by chiral SFC on Phenomenex Lux Cellulose-4 column, 4.6 mm ID x 100 mm L, 5 μm particle size. The compounds were eluted with CO<sub>2</sub> (mobile phase A) and methanol (mobile phase B) using a gradient. The gradient used was 1%B to 3%B in 3 min, 3%B to 50%B in 5 min, hold at 50%B for 1 min, then to 1%B in 1 min (analysis time 10 minutes). Column temperature 35 °C; SFC back pressure 150 bar; Flow rate 3.0 mL/min; UV detection at 220 nm; *t*<sub>R</sub> = 3.04 min (minor), 2.65 min (major); *er* 98.6:1.4

### (*R*)-3-(2,3-Dihydrobenzo[*b*][1,4]dioxin-2-yl)pyridine (**6u**)

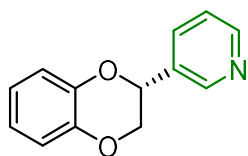

**6u**  
98:2 *er*  
70% yield

The compound was synthesized using **GP5** with **5u** (42.2 mg, 0.200 mmol, 1 equiv) at 70 °C. Purification by column chromatography (30% EtOAc in hexanes) yielded the title compound as a colorless oil (30.0 mg, 70% yield).

**<sup>1</sup>H NMR** (500 MHz, CDCl<sub>3</sub>): δ 8.69 (d, *J* = 1.8 Hz, 1H), 8.64 (dd, *J* = 4.8, 1.8 Hz, 1H), 7.76 (m, 1H), 7.36 (dd, *J* = 7.8, 4.8 Hz, 1H), 7.01–6.88 (multiple peaks, 4H), 5.19 (dd, *J* = 8.7, 2.3 Hz, 1H), 4.38 (dd, *J* = 11.5, 2.3 Hz, 1H), 4.06 (dd, *J* = 11.5, 8.7 Hz, 1H).

**<sup>13</sup>C NMR** (126 MHz, CDCl<sub>3</sub>): δ 150.2, 148.2, 143.4, 142.9, 134.2, 132.2, 123.7, 121.9, 121.8, 117.5, 117.3, 73.0, 68.9.

**HRMS** (DART): *m/z* calcd for C<sub>13</sub>H<sub>12</sub>O<sub>2</sub>N [M+H]<sup>+</sup>: 214.08626. Found: 214.08645.

$[\alpha]_D^{23} = -95.6$  ( $c = 0.60$  in  $\text{CDCl}_3$ )

The enantiomeric excess was determined by chiral SFC on ChromegaChiral CCA column, 4.6 mm ID x 100 mm L, 5  $\mu\text{m}$  particle size. The compounds were eluted with  $\text{CO}_2$  (mobile phase A) and methanol (mobile phase B) using a gradient. The gradient used was 1%B to 3%B in 3 min, 3%B to 50%B in 5 min, hold at 50%B for 1 min, then to 1%B in 1 min (analysis time 10 minutes). Column temperature 35  $^\circ\text{C}$ ; SFC back pressure 150 bar; Flow rate 3.0 mL/min; UV detection at 220 nm;  $t_R = 4.64$  min (minor), 4.94 min (major); *er* 98.3:1.6.

### Methyl (*R*)-2-(pyridin-3-yl)-2,3-dihydrobenzo[*b*][1,4]dioxine-5-carboxylate (**6v**)

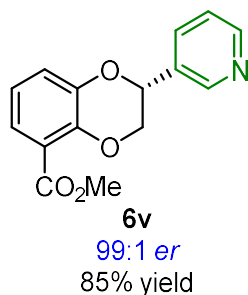

The compound was synthesized using **GP5** with **5v** (53.9 mg, 0.200 mmol, 1 equiv), 2 mol %  $[\text{Ir}(\text{cod})\text{Cl}]_2$  and 6 mol % ligand at 70  $^\circ\text{C}$ . Purification by column chromatography (60% EtOAc in hexanes) yielded the title compound as a white solid (45.9 mg, 85% yield).

$^1\text{H NMR}$  (500 MHz,  $\text{CDCl}_3$ ):  $\delta$  8.69 (s, 1H), 8.66 (d,  $J = 4.8$  Hz, 1H), 7.76 (d,  $J = 7.9$  Hz, 1H), 7.48 (d,  $J = 7.9$  Hz, 1H), 7.38 (dd,  $J = 7.9, 4.8$  Hz, 1H), 7.15 (d,  $J = 7.9$  Hz, 1H), 6.93 (t,  $J = 7.9$  Hz, 1H), 5.23 (app d,  $J = 7.4$  Hz, 1H), 4.56 (dd,  $J = 11.5, 1.9$  Hz, 1H), 4.09 (dd,  $J = 11.5, 9.1$  Hz, 1H), 3.91 (s, 3H).

$^{13}\text{C NMR}$  (126 MHz,  $\text{CDCl}_3$ ):  $\delta$  165.9, 150.3, 148.1, 144.0, 143.3, 134.1, 131.7, 124.3, 123.7, 121.6, 120.8, 120.1, 72.7, 69.1, 52.1.

**HRMS** (DART):  $m/z$  calcd for  $\text{C}_{15}\text{H}_{14}\text{O}_4\text{N}$   $[\text{M}+\text{H}]^+$ : 272.09173. Found: 272.09174.

$[\alpha]_D^{24} = -4.58$  ( $c = 0.12$  in  $\text{CDCl}_3$ )

The enantiomeric excess was determined by chiral SFC on Phenomenex Lux Cellulose-3 column, 4.6 mm ID x 100 mm L, 5  $\mu\text{m}$  particle size. The compounds were eluted with  $\text{CO}_2$  (mobile phase A) and methanol (mobile phase B) using a gradient. The gradient used was 1%B to 3%B in 3 min, 3%B to 50%B in 5 min, hold at 50%B for 1 min, then to 1%B in 1 min (analysis time 10 minutes). Column temperature 35  $^\circ\text{C}$ ; SFC back pressure 150 bar; Flow rate 3.0 mL/min; UV detection at 220 nm;  $t_R = 4.57$  min (minor), 4.16 min (major); *er* 99.0:1.0

**(R)-5-(2,3-Dihydrobenzo[*b*][1,4]dioxin-2-yl)-2-(methylthio)pyrimidine (6w)**

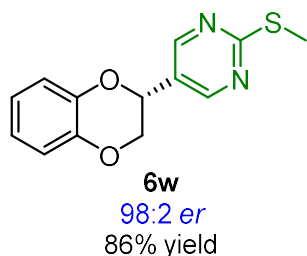

The compound was synthesized using **GP5** with **5w** (51.7 mg, 0.200 mmol, 1 equiv), 2 mol % [Ir(cod)Cl]<sub>2</sub> and 6 mol % ligand at 70 °C. Purification by column chromatography (8% EtOAc in hexanes) yielded the title compound as a white solid (44.8 mg, 86% yield).

<sup>1</sup>H NMR (500 MHz, CDCl<sub>3</sub>): δ 8.58 (s, 2H), 6.98–6.88 (multiple peaks, 4H), 5.14 (dd, *J* = 8.2, 2.3 Hz, 1H), 4.37 (dd, *J* = 11.5, 2.3 Hz, 1H), 4.09 (dd, *J* = 11.5, 8.2 Hz, 1H), 2.58 (s, 3H).

<sup>13</sup>C NMR (126 MHz, CDCl<sub>3</sub>): δ 173.6, 155.6, 143.0, 142.7, 124.9, 122.2, 122.0, 117.6, 117.3, 71.2, 68.2, 14.2.

**HRMS** (DART): *m/z* calcd for C<sub>13</sub>H<sub>13</sub>O<sub>2</sub>N<sub>2</sub>S [M+H]<sup>+</sup>: 261.06922. Found: 261.06927.

[α]<sub>D</sub><sup>23</sup> = -66.8 (*c* = 0.19 in CDCl<sub>3</sub>)

The enantiomeric excess was determined by chiral SFC on Phenomenex Lux Cellulose-3 column, 4.6 mm ID x 100 mm L, 5 μm particle size. The compounds were eluted with CO<sub>2</sub> (mobile phase A) and methanol (mobile phase B) using a gradient. The gradient used was 1%B to 3%B in 3 min, 3%B to 50%B in 5 min, hold at 50%B for 1 min, then to 1%B in 1 min (analysis time 10 minutes). Column temperature 35 °C; SFC back pressure 150 bar; Flow rate 3.0 mL/min; UV detection at 220 nm; *t*<sub>R</sub> = 4.70 min (minor), 5.12 min (major); *er* 98.2:1.8

**(R)-5-(2,3-Dihydrobenzo[*b*][1,4]dioxin-2-yl)-2-methoxypyrimidine (6x)**

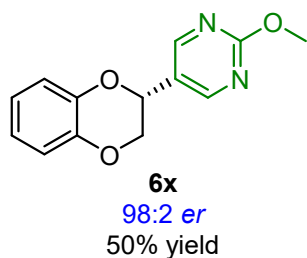

The compound was synthesized using **GP5** with **5x** (48.4 mg, 0.200 mmol, 1 equiv), 2 mol % [Ir(cod)Cl]<sub>2</sub> and 6 mol % ligand at 50 °C. Purification by column chromatography (15% EtOAc in hexanes) yielded the title compound as a white solid (24.4 mg, 50% yield).

<sup>1</sup>H NMR (500 MHz, CDCl<sub>3</sub>): δ 8.58 (s, 2H), 6.98–6.88 (multiple peaks, 4H), 5.15 (dd, *J* = 8.3, 2.1 Hz, 1H), 4.36 (dd, *J* = 11.5, 2.1 Hz, 1H), 4.10 (dd, *J* = 11.5, 8.3 Hz, 1H), 4.04 (s, 3H).

$^{13}\text{C}$  NMR (126 MHz,  $\text{CDCl}_3$ ):  $\delta$  166.0, 158.0, 143.1, 142.7, 123.5, 122.1, 122.0, 117.5, 117.3, 71.1, 68.3, 55.2.

HRMS (DART):  $m/z$  calcd for  $\text{C}_{13}\text{H}_{13}\text{O}_3\text{N}_2$   $[\text{M}+\text{H}]^+$ : 245.09207. Found: 245.09225.

$[\alpha]_{\text{D}}^{22} = -59.0$  ( $c = 0.26$  in  $\text{CDCl}_3$ )

The enantiomeric excess was determined by chiral SFC on Phenomenex Lux Cellulose-3 column, 4.6 mm ID x 100 mm L, 5  $\mu\text{m}$  particle size. The compounds were eluted with  $\text{CO}_2$  (mobile phase A) and methanol (mobile phase B) using a gradient. The gradient used was 1%B to 3%B in 3 min, 3%B to 50%B in 5 min, hold at 50%B for 1 min, then to 1%B in 1 min (analysis time 10 minutes). Column temperature 35  $^\circ\text{C}$ ; SFC back pressure 150 bar; Flow rate 3.0 mL/min; UV detection at 220 nm;  $t_{\text{R}} = 3.10$  min (minor), 3.67 min (major); *er* 97.7:2.3

#### Dimethyl (*R*)-2,3-dihydrobenzo[*b*][1,4]dioxine-2,5-dicarboxylate (**6y**)

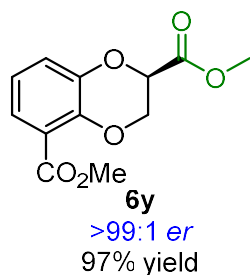

The compound was synthesized using **GP5** with **5y** (50.0 mg, 0.200 mmol, 1 equiv) at 50  $^\circ\text{C}$ . Purification by column chromatography (20% EtOAc in hexanes) yielded the title compound as a colorless oil (49.1 mg, 97% yield).

$^1\text{H}$  NMR (500 MHz,  $\text{CDCl}_3$ ):  $\delta$  7.44 (dd,  $J = 8.0, 1.0$  Hz, 1H), 7.17 (dd,  $J = 8.0, 1.0$  Hz, 1H), 6.91 (t,  $J = 8.0$  Hz, 1H), 4.87 (dd,  $J = 5.1, 3.0$  Hz, 1H), 4.52–4.43 (multiple peaks, 2H), 3.88(s, 3H), 3.82 (s, 3H).

$^{13}\text{C}$  NMR (126 MHz,  $\text{CDCl}_3$ ):  $\delta$  167.9, 165.7, 143.4, 142.7, 124.3, 121.5, 121.1, 120.0, 71.5, 65.0, 52.9, 52.1.

HRMS (DART):  $m/z$  calcd for  $\text{C}_{12}\text{H}_{13}\text{O}_6$   $[\text{M}+\text{H}]^+$ : 253.07066. Found: 253.07074.

$[\alpha]_{\text{D}}^{24} = +11.2$  ( $c = 0.20$  in  $\text{CDCl}_3$ )

The enantiomeric excess was determined by chiral HPLC on Phenomenex Lux Cellulose-3 column, 4.6 mm ID x 150 mm L, 3  $\mu\text{m}$  particle size. The compounds were eluted with 0.1% (v/v)  $\text{HClO}_4$  in water (mobile phase A) and acetonitrile (mobile phase B) using an isocratic condition 80% A/20% B. Column temperature 25  $^\circ\text{C}$ ; Flow rate 1.5 mL/min; UV detection at 220 nm;  $t_{\text{R}} = 12.7$  min (minor), 11.3 min (major); *er* 99.9:0.1

**Methyl (*R*)-2,3-dihydrobenzo[*b*][1,4]dioxine-2-carboxylate (**6z**)**

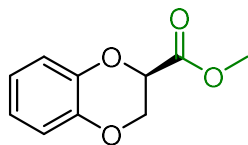

**6z**  
95:5 *er*  
95% yield

The compound was synthesized using **GP5** with **5z** (38.4 mg, 0.200 mmol, 1 equiv) at 50 °C. Purification by column chromatography (elution gradient 5–15% EtOAc in hexanes) yielded the title compound as a white solid (36.8 mg, 95% yield). NMR spectral data match literature data.<sup>2</sup>

<sup>1</sup>H NMR (500 MHz, CDCl<sub>3</sub>): δ 7.00 (m, 1H), 6.92–6.86 (multiple peaks, 3H), 4.85 (t, *J* = 3.9 Hz, 1H), 4.39 (d, *J* = 3.9 Hz, 2H), 3.82 (s, 3H).

<sup>13</sup>C NMR (126 MHz, CDCl<sub>3</sub>): δ 168.5, 142.9, 142.3, 122.2, 121.9, 117.4, 117.3, 72.0, 64.9, 52.8.

**HRMS** (HESI): *m/z* calcd for C<sub>10</sub>H<sub>10</sub>O<sub>4</sub> [M]<sup>+</sup>: 194.05736. Found: 194.05742.

[α]<sub>D</sub><sup>24</sup> = +39.5 (*c* = 0.10 in CDCl<sub>3</sub>); [lit<sup>2</sup> [α]<sub>D</sub><sup>20</sup> = +55.1 (*c* = 1.0, CHCl<sub>3</sub>) for 99% ee, (*R*)-isomer]

The enantiomeric excess was determined by chiral SFC on Phenomenex Lux Cellulose-2 column, 4.6 mm ID x 100 mm L, 5 μm particle size. The compounds were eluted with CO<sub>2</sub> (mobile phase A) and methanol (mobile phase B) using a gradient. The gradient used was 1%B to 3%B in 3 min, 3%B to 50%B in 5 min, hold at 50%B for 1 min, then to 1%B in 1 min (analysis time 10 minutes). Column temperature 35 °C; SFC back pressure 150 bar; Flow rate 3.0 mL/min; UV detection at 220 nm; *t*<sub>R</sub> = 2.91 min (minor), 2.36 min (major); *er* 95.4:4.6

**(*R*)-(2,3-Dihydrobenzo[*b*][1,4]dioxin-2-yl)(pyrrolidin-1-yl)methanone (**6aa**)**

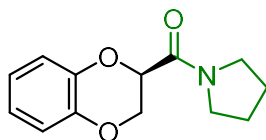

**6aa**  
93:7 *er*  
93% yield

The compound was synthesized using **GP5** with **5aa** (46.3 mg, 0.200 mmol, 1 equiv) at 50 °C. Purification by column chromatography (elution gradient 10–30% EtOAc in hexanes) yielded the title compound as a colorless oil (43.3 mg, 93% yield).

<sup>1</sup>H NMR (500 MHz, CDCl<sub>3</sub>): δ 6.95–6.83 (multiple peaks, 4H), 4.76 (dd, *J* = 8.1, 2.5 Hz, 1H), 4.47 (dd, *J* = 11.7, 2.5 Hz, 1H), 4.33 (dd, *J* = 11.7, 8.1 Hz, 1H), 3.76 (m, 1H), 3.62–3.52 (multiple peaks, 3H), 2.07–1.85 (multiple peaks, 4H).



$^{13}\text{C}$  NMR (126 MHz,  $\text{CDCl}_3$ ):  $\delta$  165.0, 143.3, 142.8, 122.0, 121.5, 117.3, 117.3, 72.3, 65.1, 46.7, 46.4, 26.3, 23.8.

HRMS (DART):  $m/z$  calcd for  $\text{C}_{13}\text{H}_{16}\text{O}_3\text{N}$   $[\text{M}+\text{H}]^+$ : 234.11247. Found: 234.11250.

$[\alpha]_{\text{D}}^{24} = +65.9$  ( $c = 0.17$  in  $\text{CDCl}_3$ )

The enantiomeric excess was determined by chiral SFC on ChromegaChiral CCC column, 4.6 mm ID x 100 mm L, 5  $\mu\text{m}$  particle size. The compounds were eluted with  $\text{CO}_2$  (mobile phase A) and methanol (mobile phase B) using a gradient. The gradient used was 1%B to 3%B in 3 min, 3%B to 50%B in 5 min, hold at 50%B for 1 min, then to 1%B in 1 min (analysis time 10 minutes). Column temperature 35  $^\circ\text{C}$ ; SFC back pressure 150 bar; Flow rate 3.0 mL/min; UV detection at 220 nm;  $t_{\text{R}} = 6.78$  min (minor), 5.33 min (major); *er* 92.8:7.2.

**(R)-(2,3-Dihydrobenzo[b][1,4]dioxin-2-yl)(morpholino)methanone (6ab)**

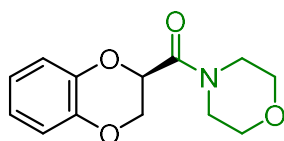

**6ab**  
98:2 *er*  
93% yield

The compound was synthesized using **GP5** with **5ab** (49.5 mg, 0.200 mmol, 1 equiv) at 50  $^\circ\text{C}$ . Purification by column chromatography (elution gradient 10–30% EtOAc in hexanes) yielded the title compound as a colorless oil (46.5 mg, 93% yield).

$^1\text{H}$  NMR (500 MHz,  $\text{CDCl}_3$ ):  $\delta$  6.93–6.83 (multiple peaks, 4H), 4.81 (dd,  $J = 8.0, 2.4$  Hz, 1H), 4.49 (dd,  $J = 11.8, 2.5$  Hz, 1H), 4.34 (dd,  $J = 11.8, 8.0$  Hz, 1H), 3.83–3.67 (multiple peaks, 6H), 3.63–3.54 (multiple peaks, 2H).

$^{13}\text{C}$  NMR (126 MHz,  $\text{CDCl}_3$ ):  $\delta$  165.0, 143.3, 142.4, 122.4, 121.6, 117.5, 117.2, 70.6, 66.84, 66.77, 65.1, 46.3, 42.5.

HRMS (DART):  $m/z$  calcd for  $\text{C}_{13}\text{H}_{16}\text{O}_4\text{N}$   $[\text{M}+\text{H}]^+$ : 250.10738. Found: 250.10742.

$[\alpha]_{\text{D}}^{24} = +95.0$  ( $c = 0.16$  in  $\text{CDCl}_3$ )

The enantiomeric excess was determined by chiral SFC on Phenomenex Lux Cellulose-4 column, 4.6 mm ID x 100 mm L, 5  $\mu\text{m}$  particle size. The compounds were eluted with  $\text{CO}_2$  (mobile phase A) and methanol (mobile phase B) using a gradient. The gradient used was 1%B to 3%B in 3 min, 3%B to 50%B in 5 min, hold at 50%B for 1 min, then to 1%B in 1 min (analysis time 10 minutes). Column temperature 35  $^\circ\text{C}$ ; SFC back pressure 150 bar; Flow rate 3.0 mL/min; UV detection at 220 nm;  $t_{\text{R}} = 5.74$  min (minor), 5.08 min (major); *er* 98.2:1.8

**(R)-(2,3-Dihydrobenzo[b][1,4]dioxin-2-yl)(piperidin-1-yl)methanone (6ac)**

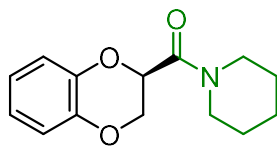

**6ac**  
97:3 *er*  
90% yield

The compound was synthesized using **GP5** with **5ac** (49.1 mg, 0.200 mmol, 1 equiv) at 50 °C. Purification by column chromatography (elution gradient 5–20% EtOAc in hexanes) yielded the title compound as a colorless oil (44.4 mg, 90% yield). NMR spectral data match literature data.<sup>7</sup>

<sup>1</sup>H NMR (500 MHz, CDCl<sub>3</sub>): δ 6.93–6.83 (multiple peaks, 4H), 4.83 (dd, *J* = 8.2, 2.5 Hz, 1H), 4.48 (dd, *J* = 12.0, 2.5 Hz, 1H), 4.31 (dd, *J* = 12.0, 8.2 Hz, 1H), 3.75–3.66 (multiple peaks, 2H), 3.53–3.44 (multiple peaks, 2H), 1.76–1.58 (multiple peaks, 6H).

<sup>13</sup>C NMR (126 MHz, CDCl<sub>3</sub>): δ 164.6, 143.4, 142.8, 122.1, 121.4, 117.3, 117.3, 70.7, 65.4, 46.8, 43.2, 26.6, 25.5, 24.5.

**HRMS** (DART): *m/z* calcd for C<sub>14</sub>H<sub>18</sub>O<sub>3</sub>N [M+H]<sup>+</sup>: 248.12812. Found: 248.12821.

[α]<sub>D</sub><sup>24</sup> = +73.4 (*c* = 0.16 in CDCl<sub>3</sub>)

The enantiomeric excess was determined by chiral SFC on Phenomenex Lux Cellulose-2 column, 4.6 mm ID x 100 mm L, 5 μm particle size. The compounds were eluted with CO<sub>2</sub> (mobile phase A) and methanol (mobile phase B) using a gradient. The gradient used was 1%B to 3%B in 3 min, 3%B to 50%B in 5 min, hold at 50%B for 1 min, then to 1%B in 1 min (analysis time 10 minutes). Column temperature 35 °C; SFC back pressure 150 bar; Flow rate 3.0 mL/min; UV detection at 220 nm; *t*<sub>R</sub> = 7.15 min (minor), 5.20 min (major); *er* 97.5:2.5

**(R)-(2,3-Dihydrobenzo[b][1,4]dioxin-2-yl)(4-phenylpiperazin-1-yl)methanone (6ad)**

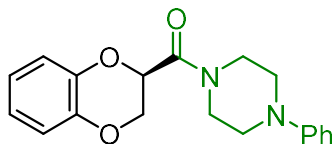

**6ad**  
98:2 *er*  
84% yield

The compound was synthesized using **GP5** with **5ad** (64.5 mg, 0.200 mmol, 1 equiv) at 50 °C. Purification by column chromatography (elution gradient 5–15% EtOAc in hexanes) yielded the title compound as a colorless oil (54.6 mg, 84% yield).

**<sup>1</sup>H NMR** (500 MHz, CDCl<sub>3</sub>):  $\delta$  7.30 (m, 2H), 6.97–6.83 (multiple peaks, 7H), 4.88 (dd,  $J$  = 8.1, 2.5 Hz, 1H), 4.52 (dd,  $J$  = 11.9, 2.5 Hz, 1H), 4.36 (dd,  $J$  = 11.9, 8.1 Hz, 1H), 3.98–3.90 (multiple peaks, 2H), 3.80–3.67 (multiple peaks, 2H), 3.32–3.12 (multiple peaks, 4H).

**<sup>13</sup>C NMR** (126 MHz, CDCl<sub>3</sub>):  $\delta$  164.9, 150.9, 143.3, 142.5, 129.3, 122.3, 121.6, 120.8, 117.5, 117.3, 116.8, 70.7, 65.2, 50.0, 49.3, 45.7, 42.1.

**HRMS** (HESI):  $m/z$  calcd for C<sub>19</sub>H<sub>21</sub>O<sub>3</sub>N<sub>2</sub> [M+H]<sup>+</sup>: 325.15467. Found: 325.15435.

$[\alpha]_D^{24} = +46.0$  ( $c = 0.10$  in CDCl<sub>3</sub>)

The enantiomeric excess was determined by chiral SFC on ChromegaChiral CCC column, 4.6 mm ID x 100 mm L, 5  $\mu$ m particle size. The compounds were eluted with CO<sub>2</sub> (mobile phase A) and methanol (mobile phase B) using a gradient. The gradient used was 1%B to 3%B in 3 min, 3%B to 50%B in 5 min, hold at 50%B for 1 min, then to 1%B in 1 min (analysis time 10 minutes). Column temperature 35 °C; SFC back pressure 150 bar; Flow rate 3.0 mL/min; UV detection at 220 nm;  $t_R = 7.48$  min (minor), 6.63 min (major); *er* 98.0:2.0

**(*R*)-(2,3-Dihydrobenzo[*b*][1,4]dioxin-2-yl)(3,4-dihydroisoquinolin-2(*1H*)-yl)methanone (6ae)**

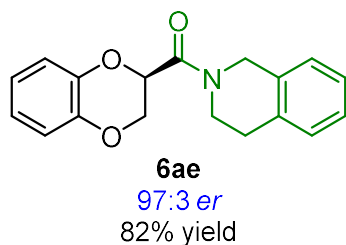

The compound was synthesized using **GP5** with **5ae** (58.7 mg, 0.200 mmol, 1 equiv) at 50 °C. Purification by column chromatography (elution gradient 5–20% EtOAc in hexanes) yielded the title compound as a tan oil (48.5 mg, 82% yield).

Two sets of peaks were observed with about 3:2 ratio in <sup>1</sup>H and <sup>13</sup>C NMR spectrum at 300 K. At 350 K two sets of <sup>1</sup>H peaks start to coalesce, which indicates the presence of two rotamers at 300 K.

**<sup>1</sup>H NMR** (600.04 MHz, DMSO-*d*<sub>6</sub>):  $\delta$  7.23–7.17 (m, 4H, rotamer 1+2), 6.96–6.91 (m, 0.6H, rotamer 1), 6.91–6.82 (m, 3.4H, rotamer 1+2), 5.33 (dd,  $J$  = 6.4, 2.4 Hz, 0.4H, rotamer 2), 5.30 (dd,  $J$  = 6.4, 2.3 Hz, 0.6H, rotamer 1), 4.86 (d,  $J$  = 16.3 Hz, 0.4H, rotamer 2), 4.81 (d,  $J$  = 16.3 Hz, 0.4H, rotamer 2), 4.68 (d,  $J$  = 16.8 Hz, 0.6H, rotamer 1), 4.59 (d,  $J$  = 16.8 Hz, 0.6H, rotamer 1), 4.44–4.39 (m, 1H, rotamer 1+2), 4.24–4.18 (m, 1H, rotamer 1+2), 3.93–3.87 (m, 0.6H, rotamer 2), 3.83–3.77 (m, 0.6H, rotamer 2), 3.75–3.65 (m, 0.8H, rotamer 1), 2.94 (t,  $J$  = 6.0 Hz, 1.2H, rotamer 2), 2.81 (t,  $J$  = 6.0 Hz, 0.8H, rotamer 1).

**<sup>13</sup>C NMR** (150.88 MHz, DMSO-*d*<sub>6</sub>):  $\delta$  rotamer 1: 165.3, 143.0, 142.8, 134.3, 132.9, 128.5, 126.5, 126.5, 126.2, 121.5, 121.4, 117.0, 116.9, 69.8, 64.7, 43.9, 42.7, 28.8; rotamer 2: 165.2, 142.9, 142.8, 134.6, 133.3, 128.5, 126.6, 126.2, 126.2, 121.4, 121.4, 117.0, 116.8, 69.8, 64.6, 46.3, 40.0, 27.6.

**HRMS** (DART):  $m/z$  calcd for C<sub>18</sub>H<sub>18</sub>O<sub>3</sub>N [M+H]<sup>+</sup>: 296.12812. Found: 296.12814.

$[\alpha]_D^{26} = +34.2$  ( $c = 0.18$  in  $\text{CDCl}_3$ )

The enantiomeric excess was determined by chiral SFC on Phenomenex Lux Cellulose-3 column, 4.6 mm ID x 100 mm L, 5  $\mu\text{m}$  particle size. The compounds were eluted with  $\text{CO}_2$  (mobile phase A) and methanol (mobile phase B) using a gradient. The gradient used was 1%B to 3%B in 3 min, 3%B to 50%B in 5 min, hold at 50%B for 1 min, then to 1%B in 1 min (analysis time 10 minutes). Column temperature 35  $^\circ\text{C}$ ; SFC back pressure 150 bar; Flow rate 3.0 mL/min; UV detection at 220 nm;  $t_R = 4.93$  min (minor), 5.47 min (major); *er* 97.5:2.5.

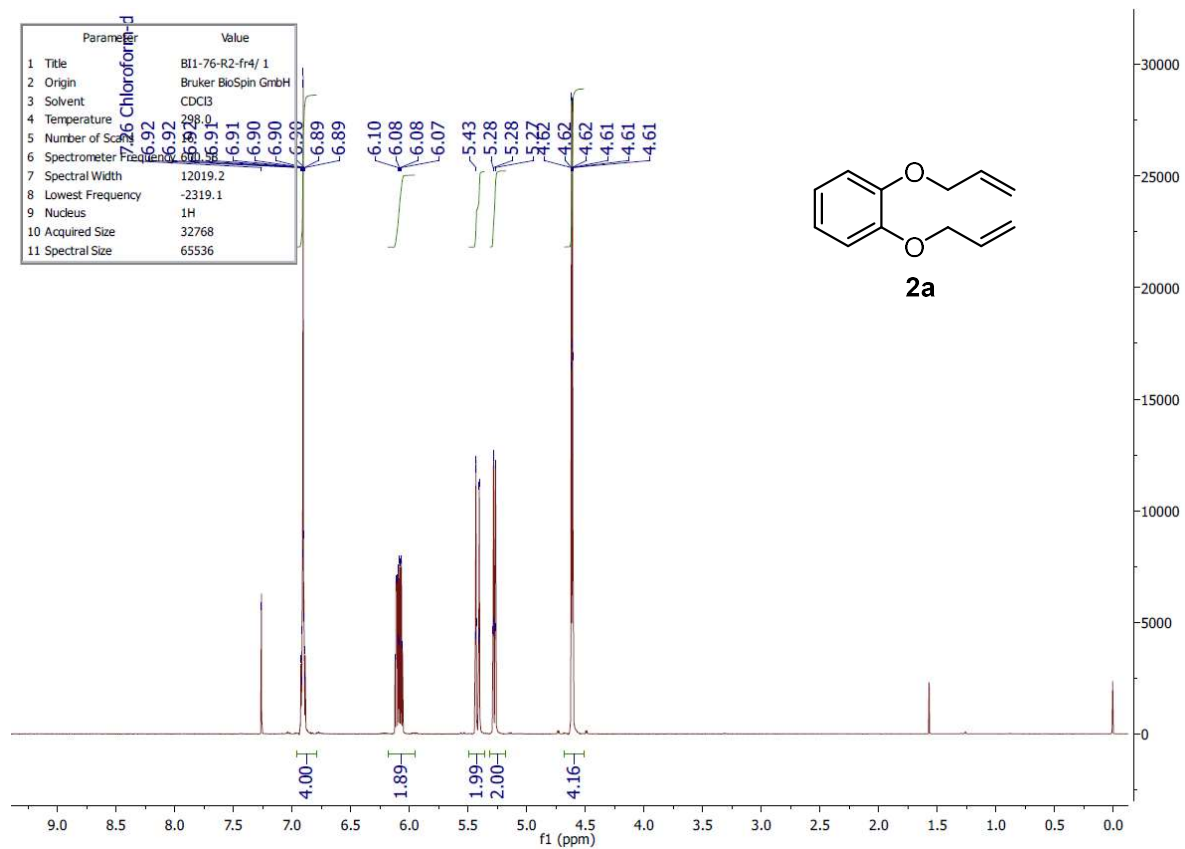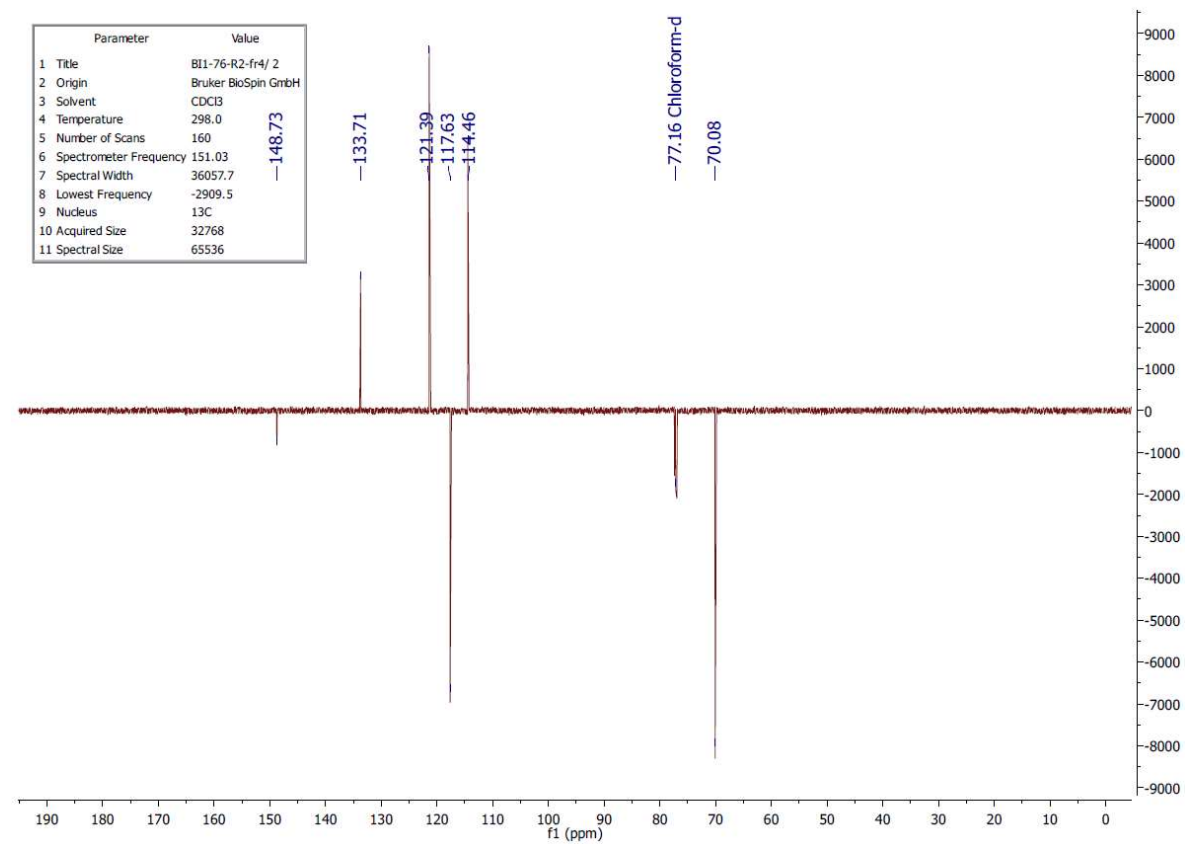

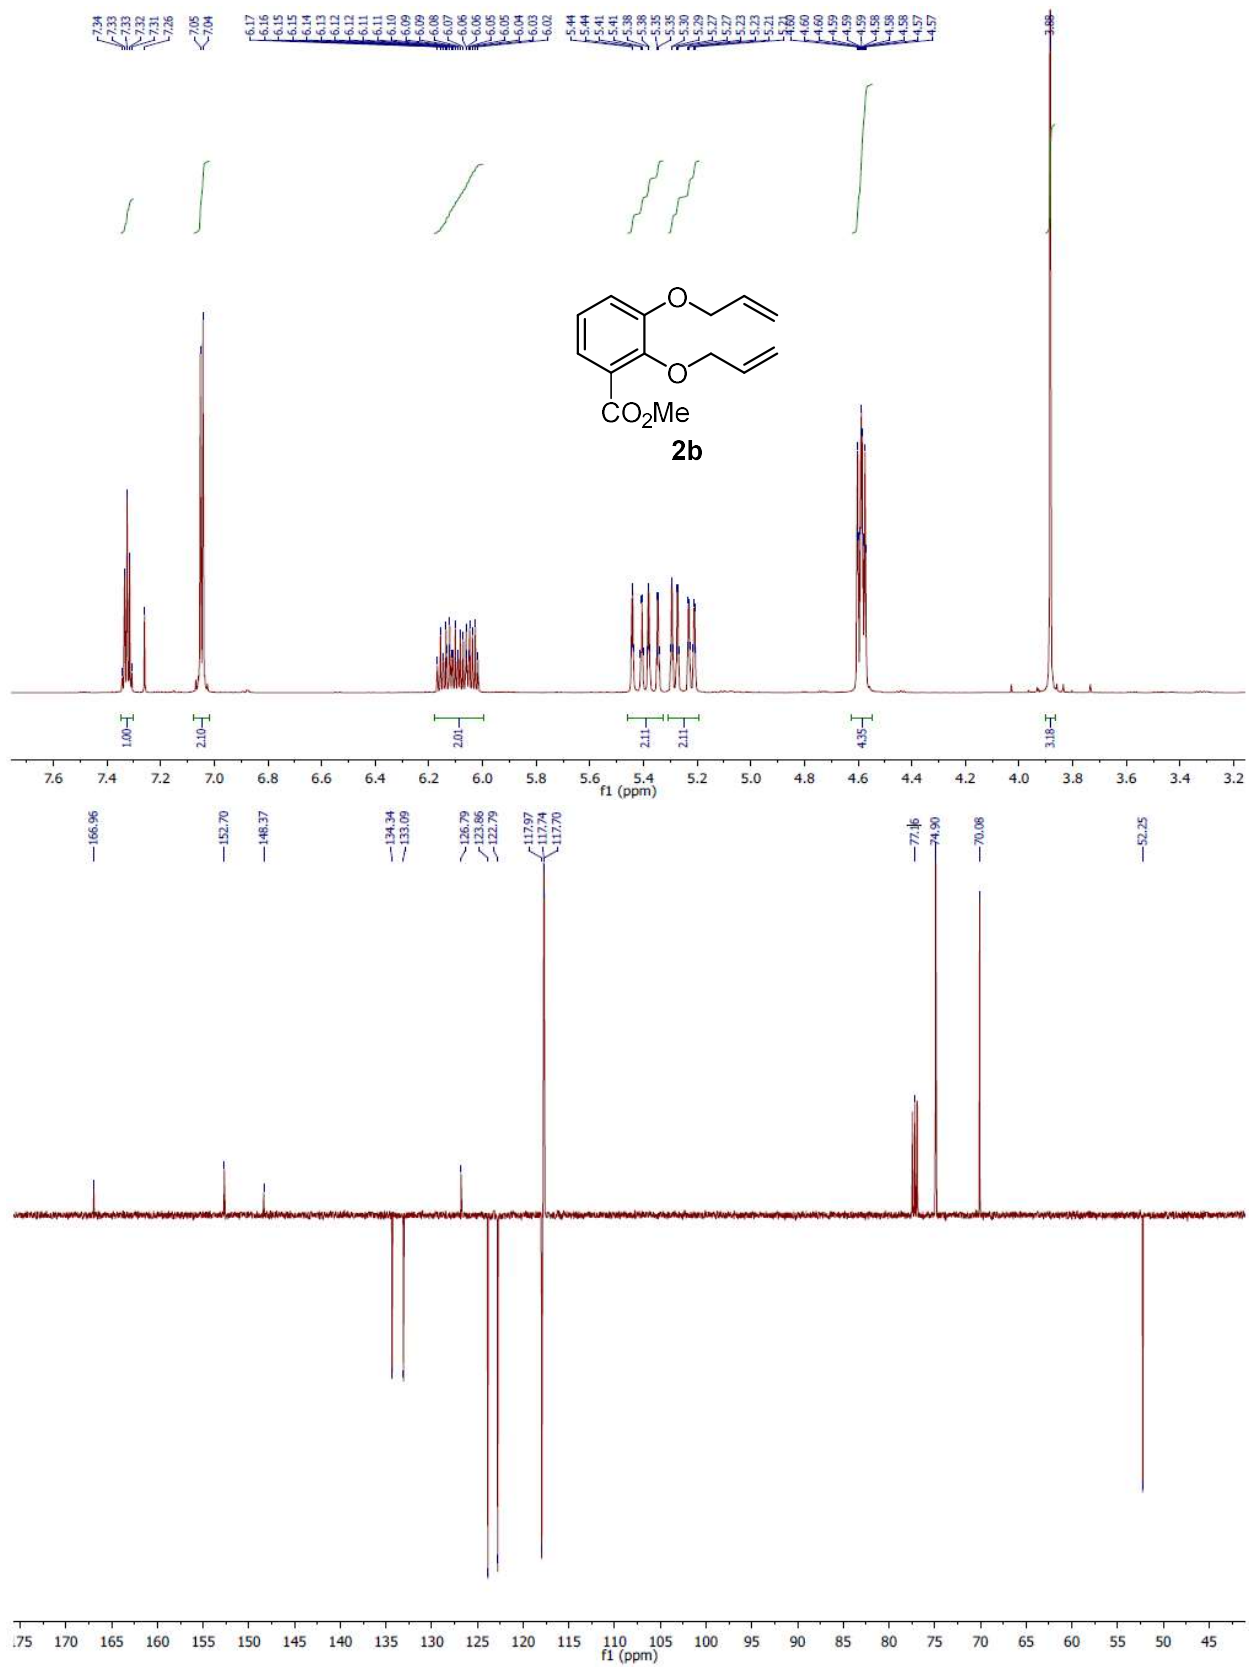

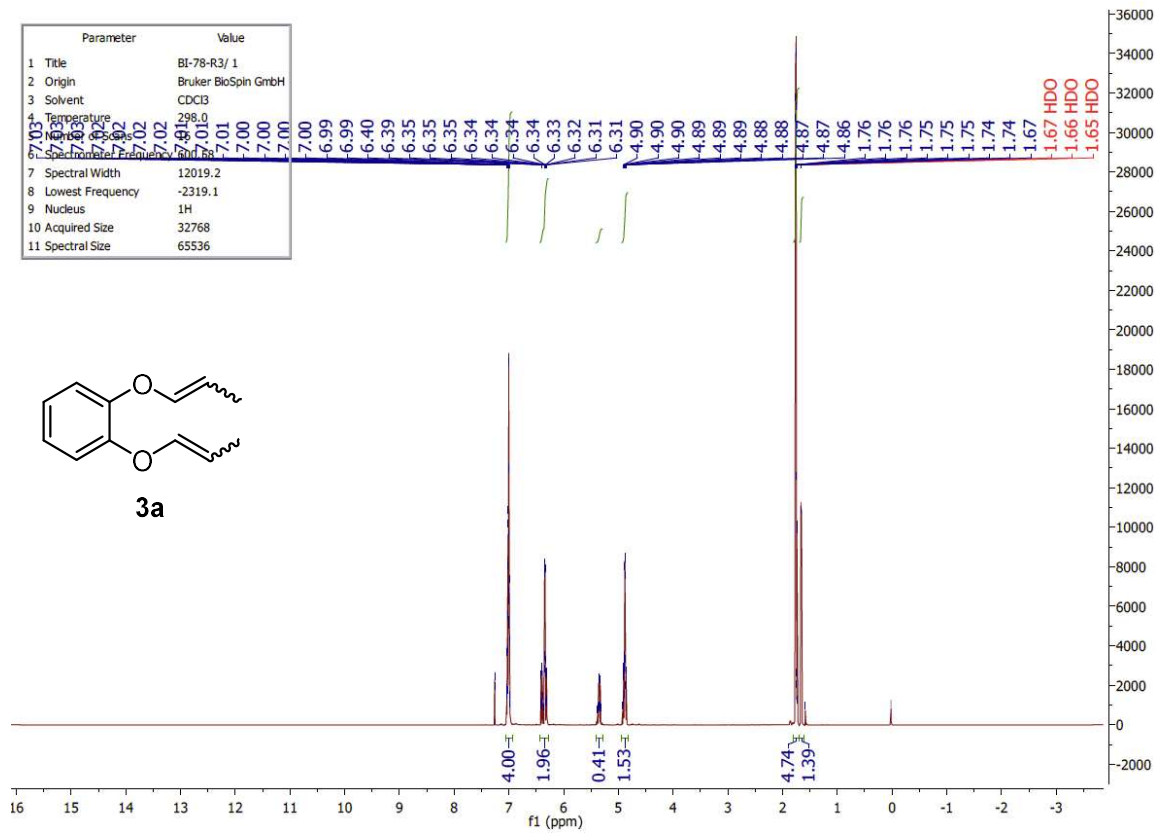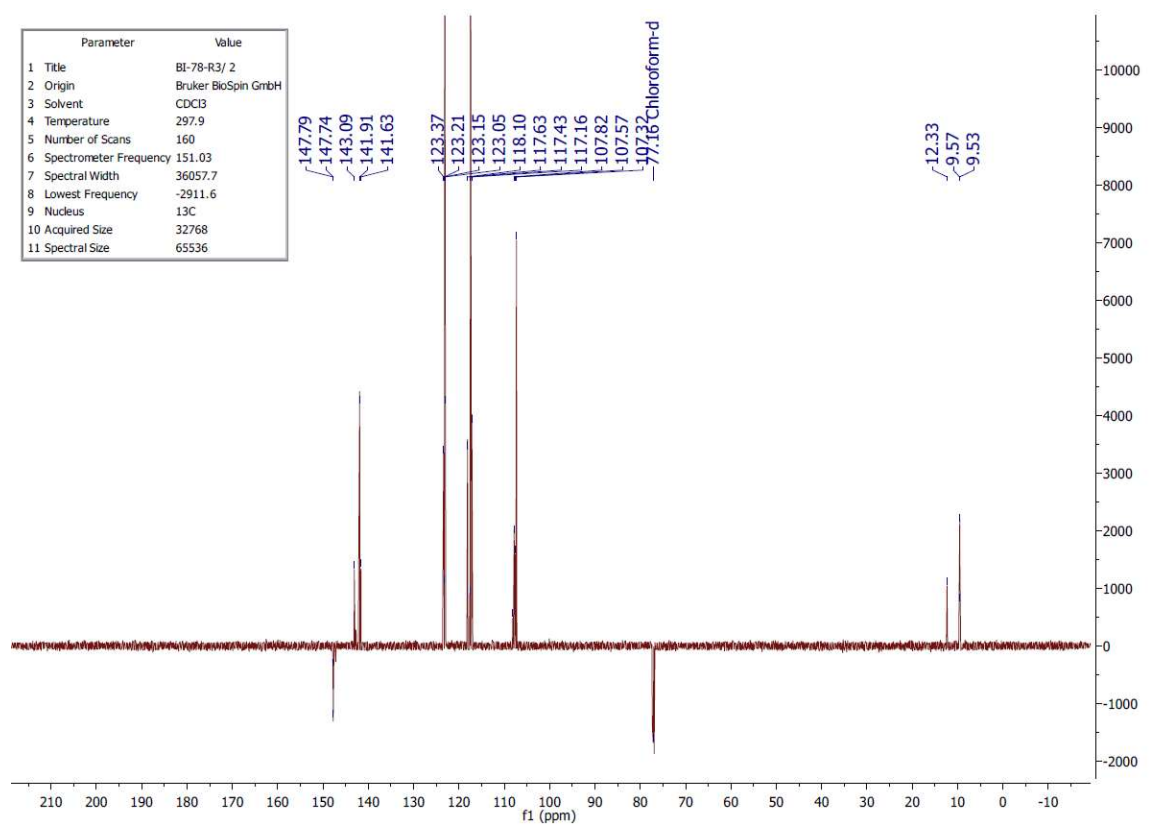

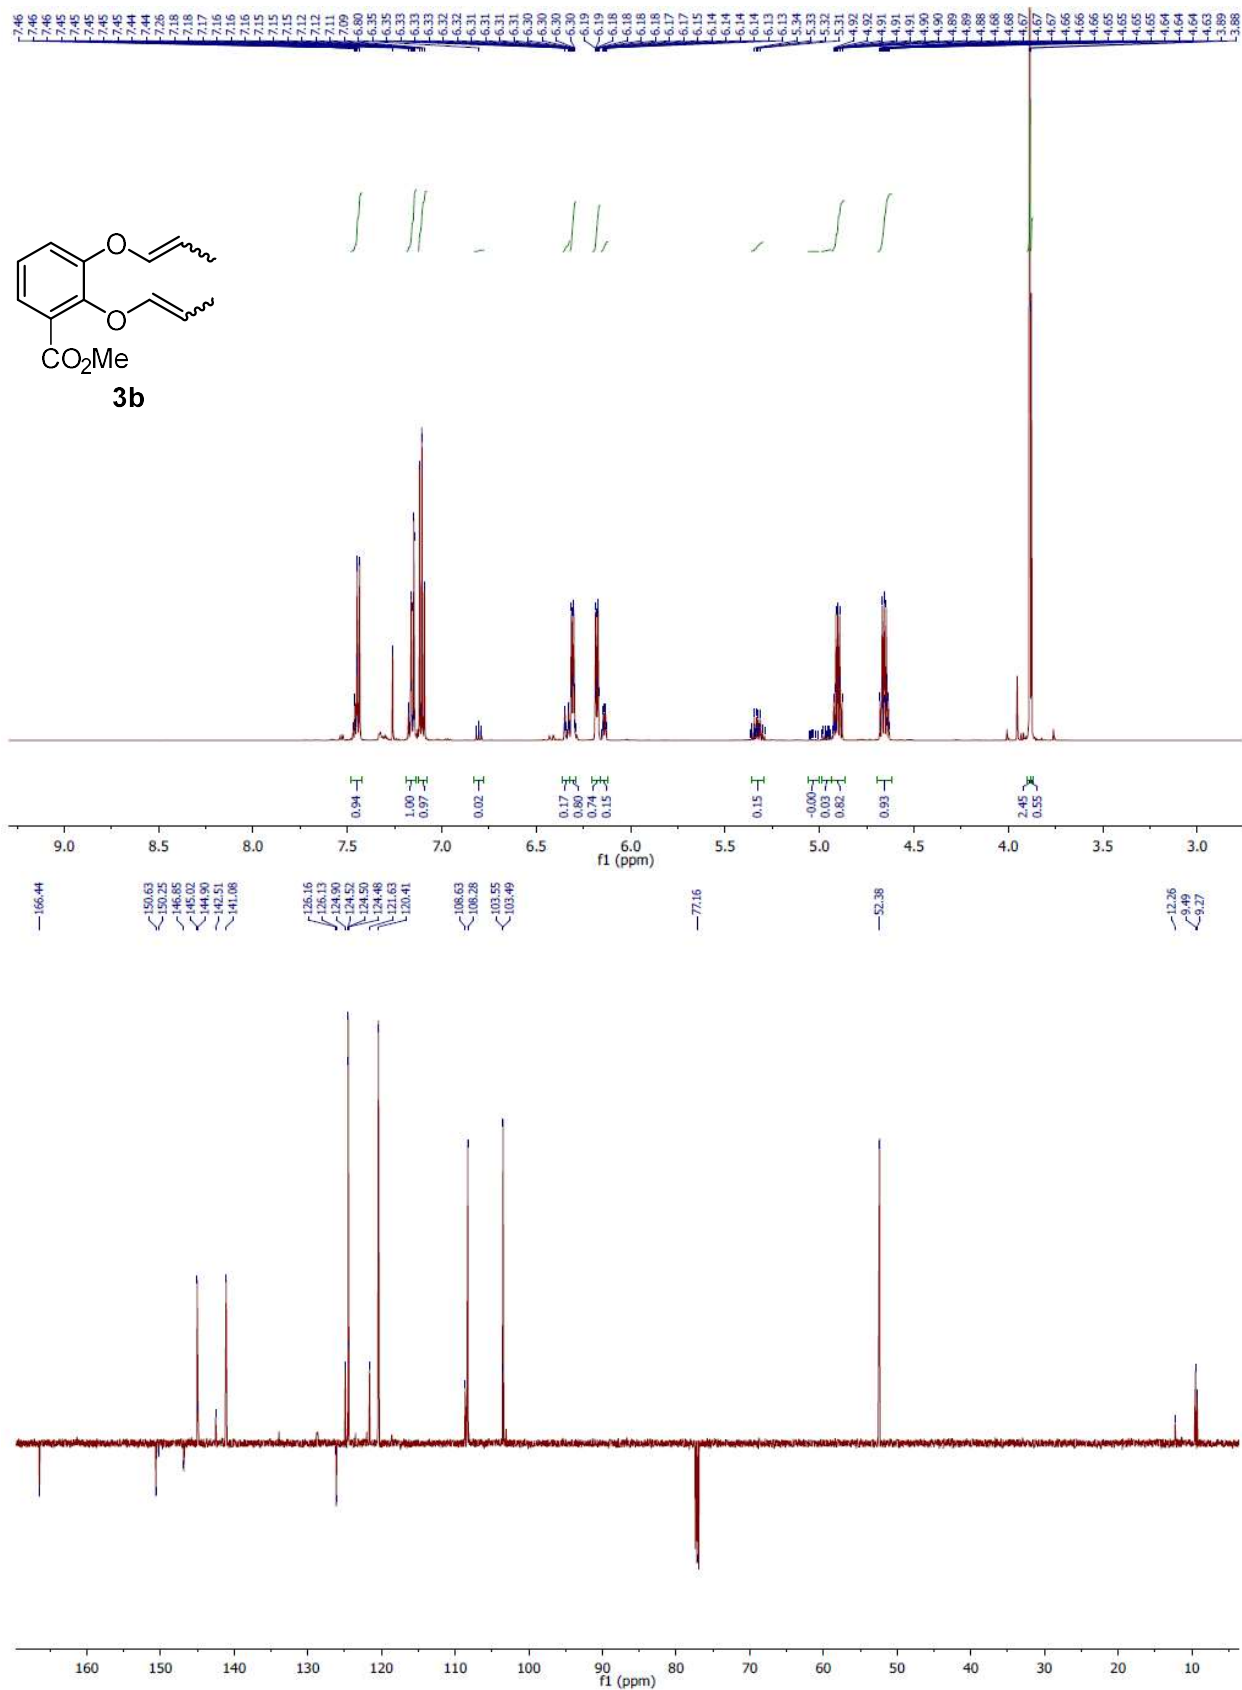



| Parameter                | Value               |
|--------------------------|---------------------|
| 1 Title                  | BI-79-R1/ 1         |
| 2 Origin                 | Bruker BioSpin GmbH |
| 3 Solvent                | CDCl3               |
| 4 Temperature            | 298.0               |
| 5 Number of Scans        | 16                  |
| 6 Spectrometer Frequency | 600.58              |
| 7 Spectral Width         | 12019.2             |
| 8 Lowest Frequency       | -2319.1             |
| 9 Nucleus                | 1H                  |
| 10 Acquired Size         | 32768               |
| 11 Spectral Size         | 65536               |

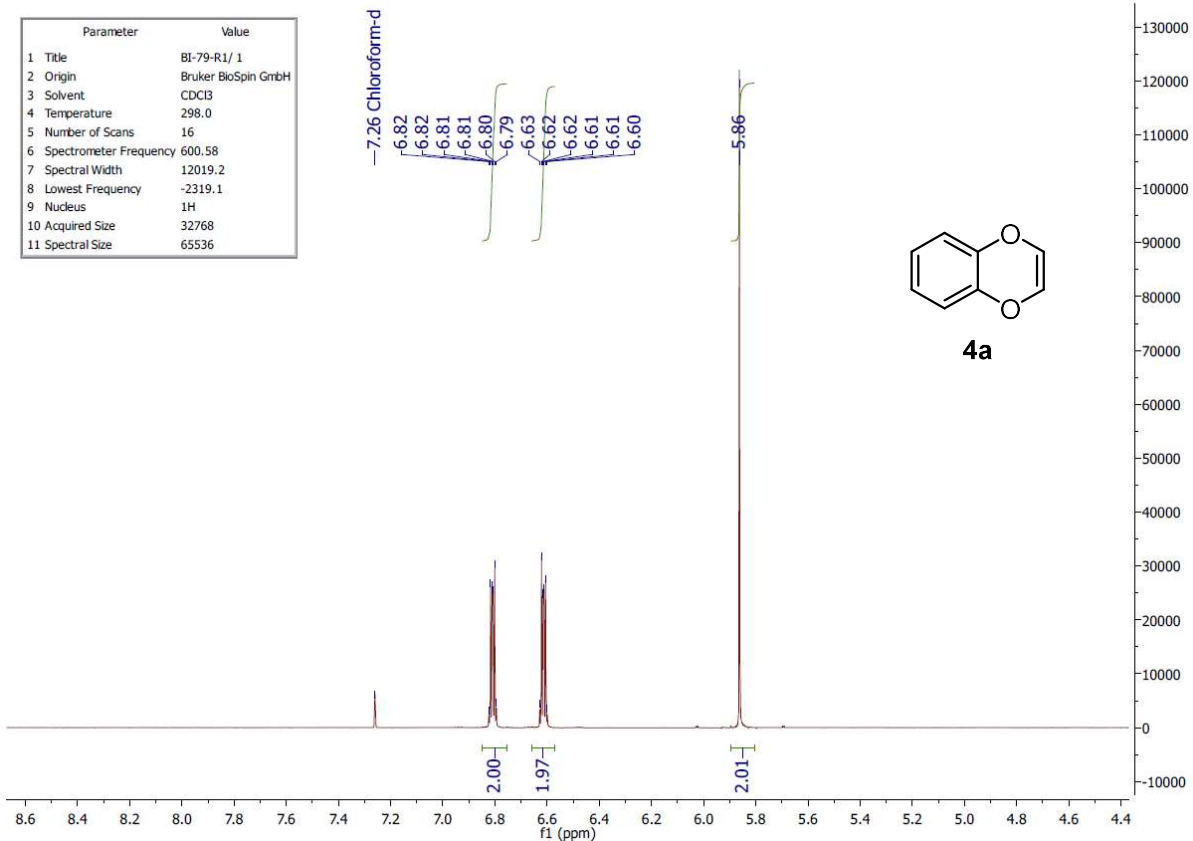

| Parameter                | Value               |
|--------------------------|---------------------|
| 1 Title                  | BI-79-R1/ 2         |
| 2 Origin                 | Bruker BioSpin GmbH |
| 3 Solvent                | CDCl3               |
| 4 Temperature            | 298.0               |
| 5 Number of Scans        | 256                 |
| 6 Spectrometer Frequency | 151.03              |
| 7 Spectral Width         | 36057.7             |
| 8 Lowest Frequency       | -2908.7             |
| 9 Nucleus                | 13C                 |
| 10 Acquired Size         | 32768               |
| 11 Spectral Size         | 65536               |

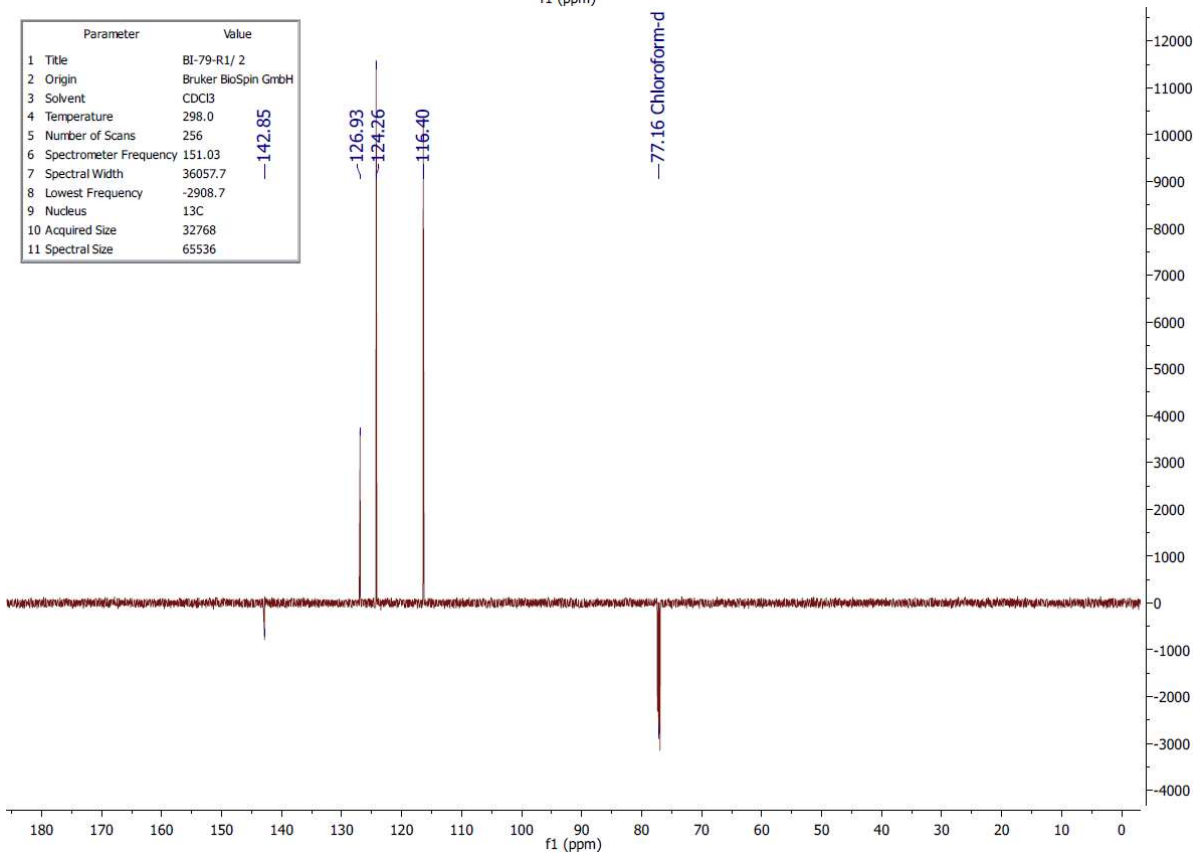

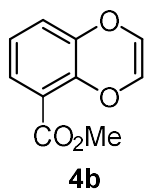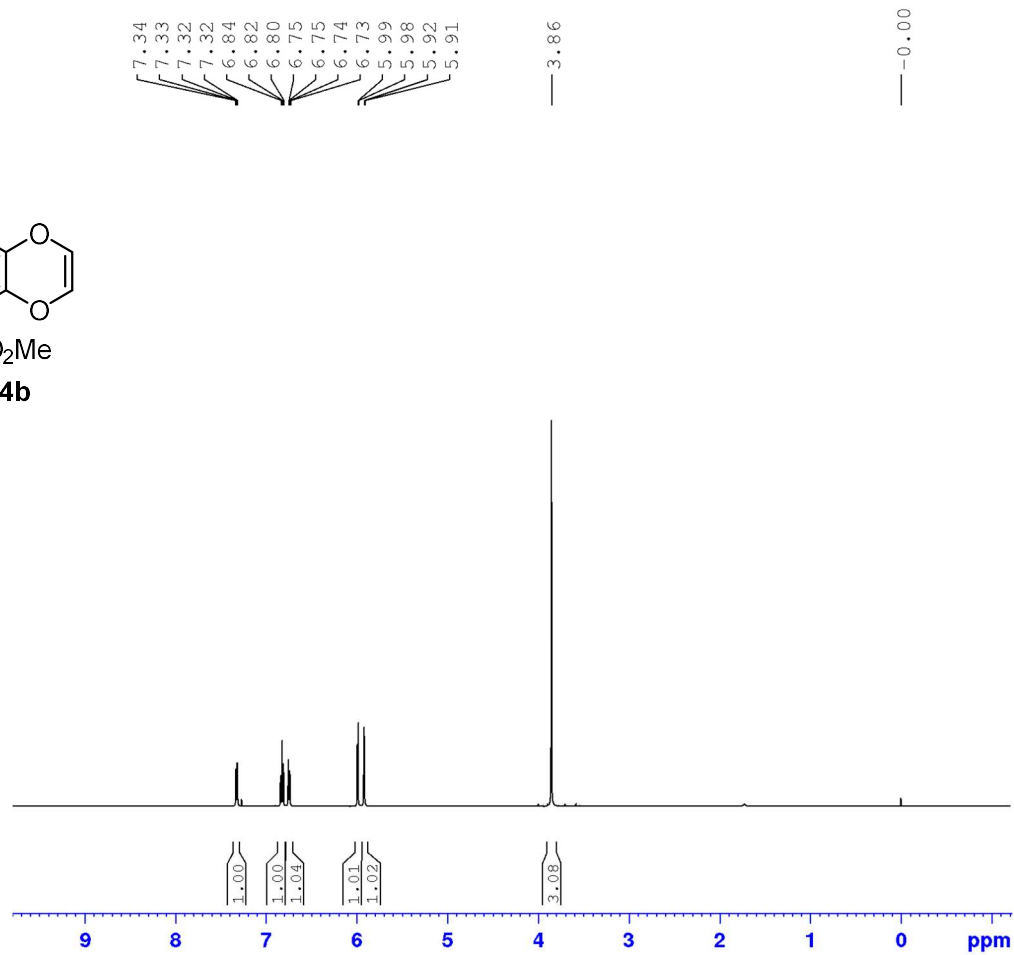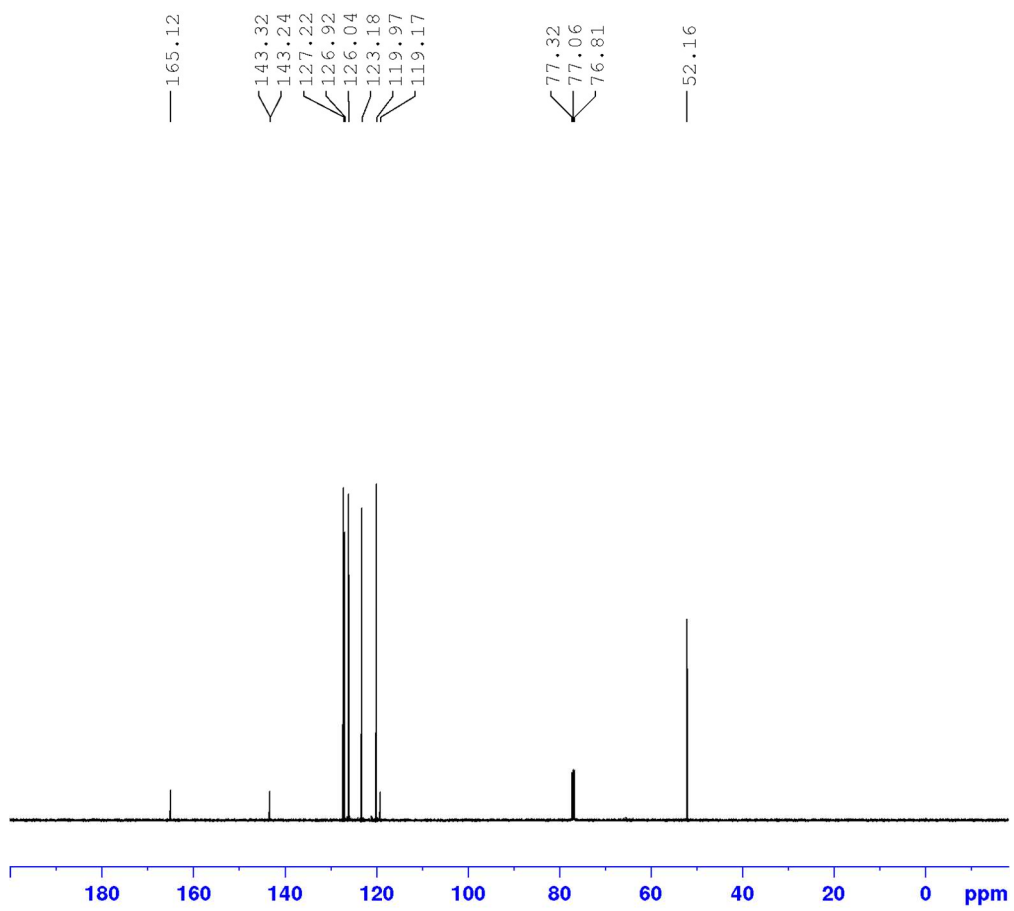

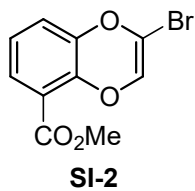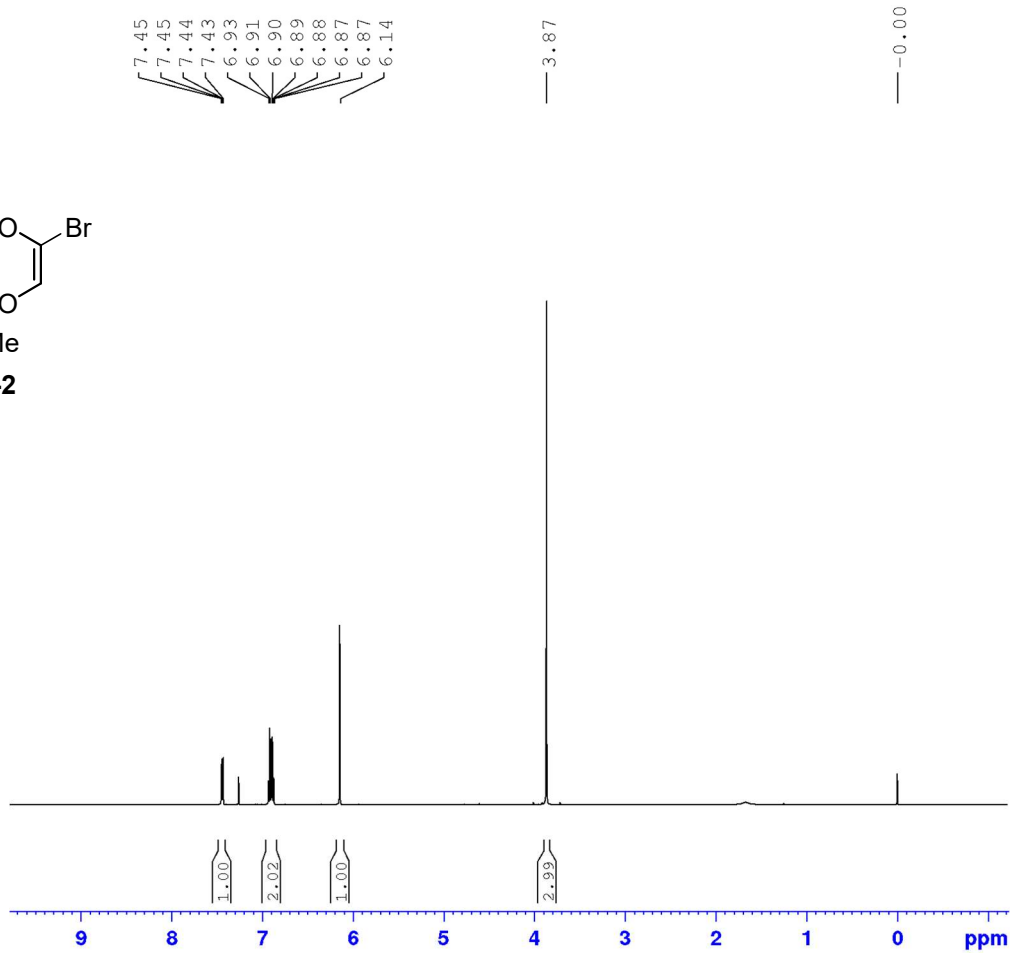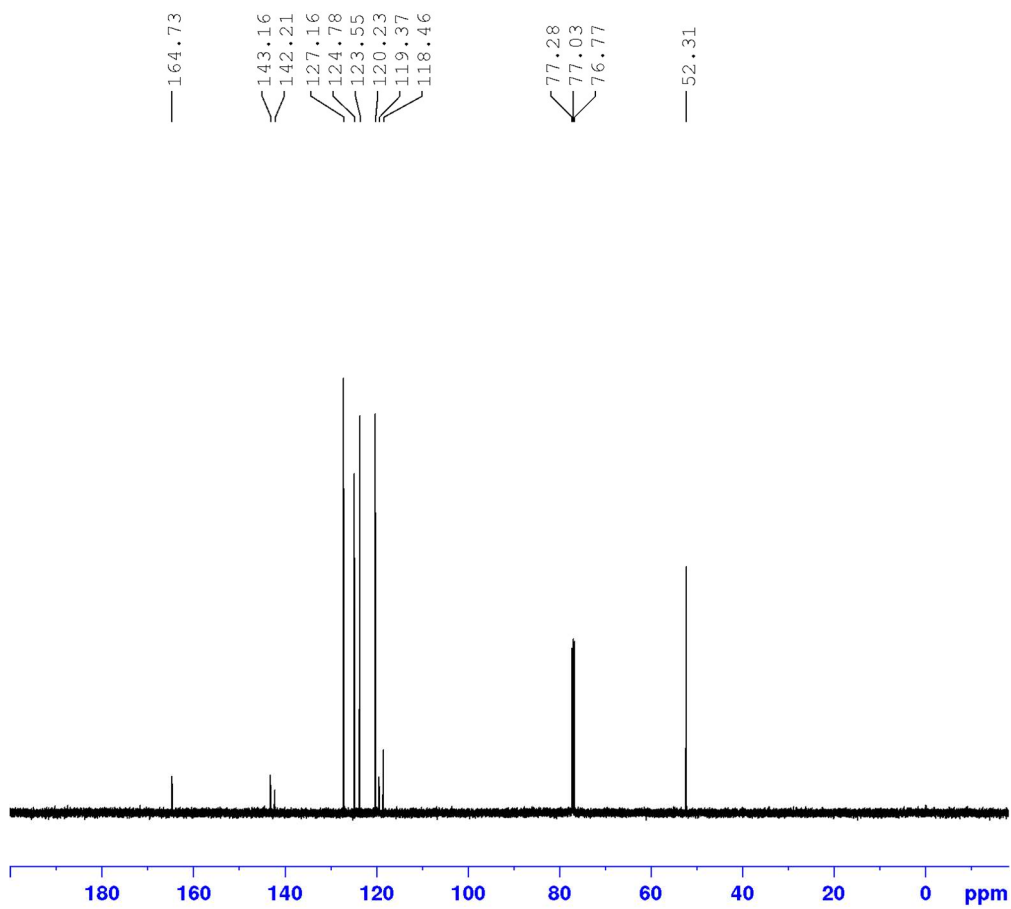

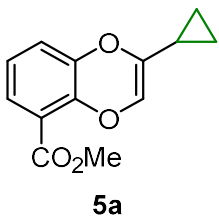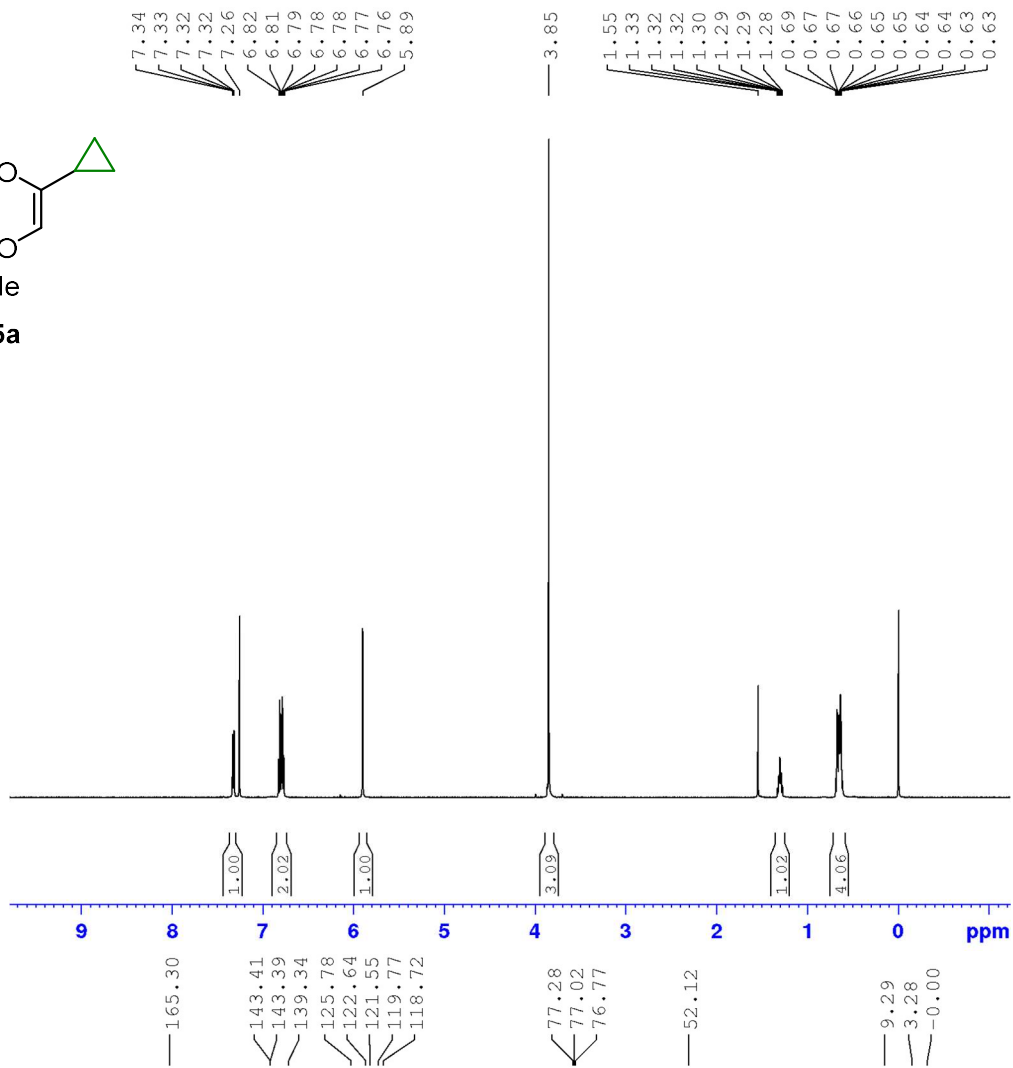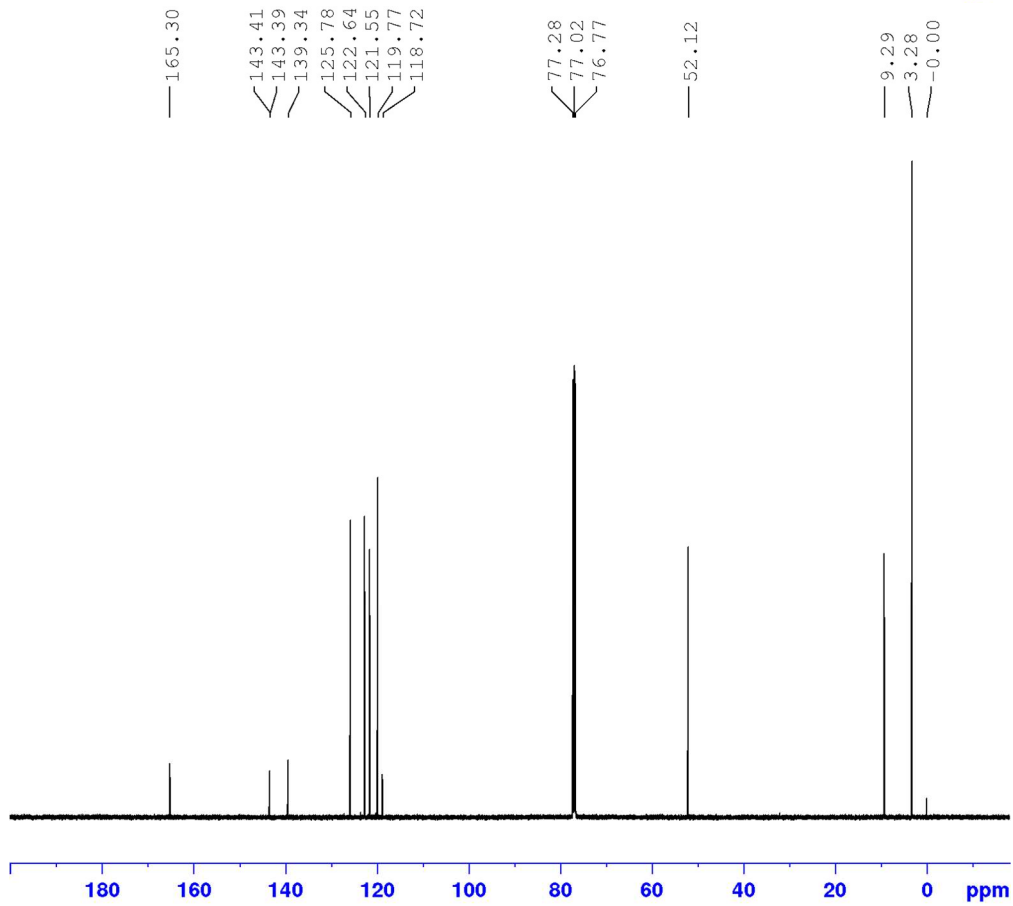

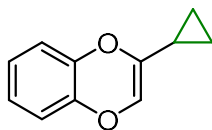

5b

7.26  
6.80  
6.79  
6.78  
6.64  
6.63  
6.62  
6.61  
6.60  
5.78

1.32  
1.31  
1.29  
1.28  
1.27  
0.65  
0.64  
-0.00

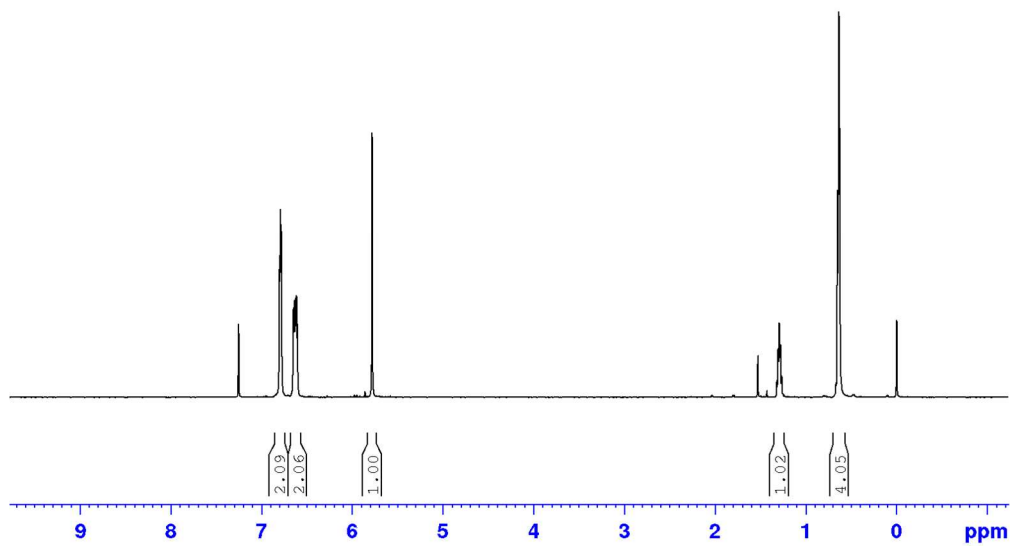

142.71  
142.59  
138.80  
123.80  
123.59  
121.44  
116.03  
115.84

77.27  
77.02  
76.76

9.50  
3.19  
-0.00

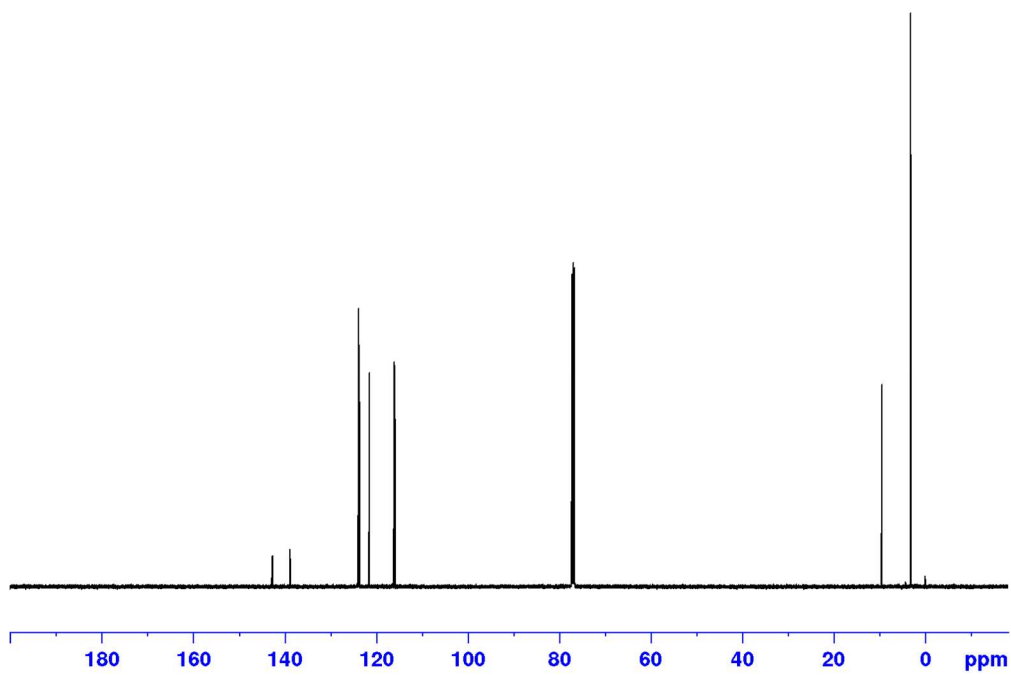

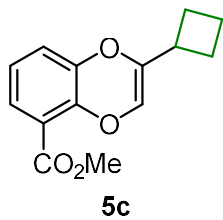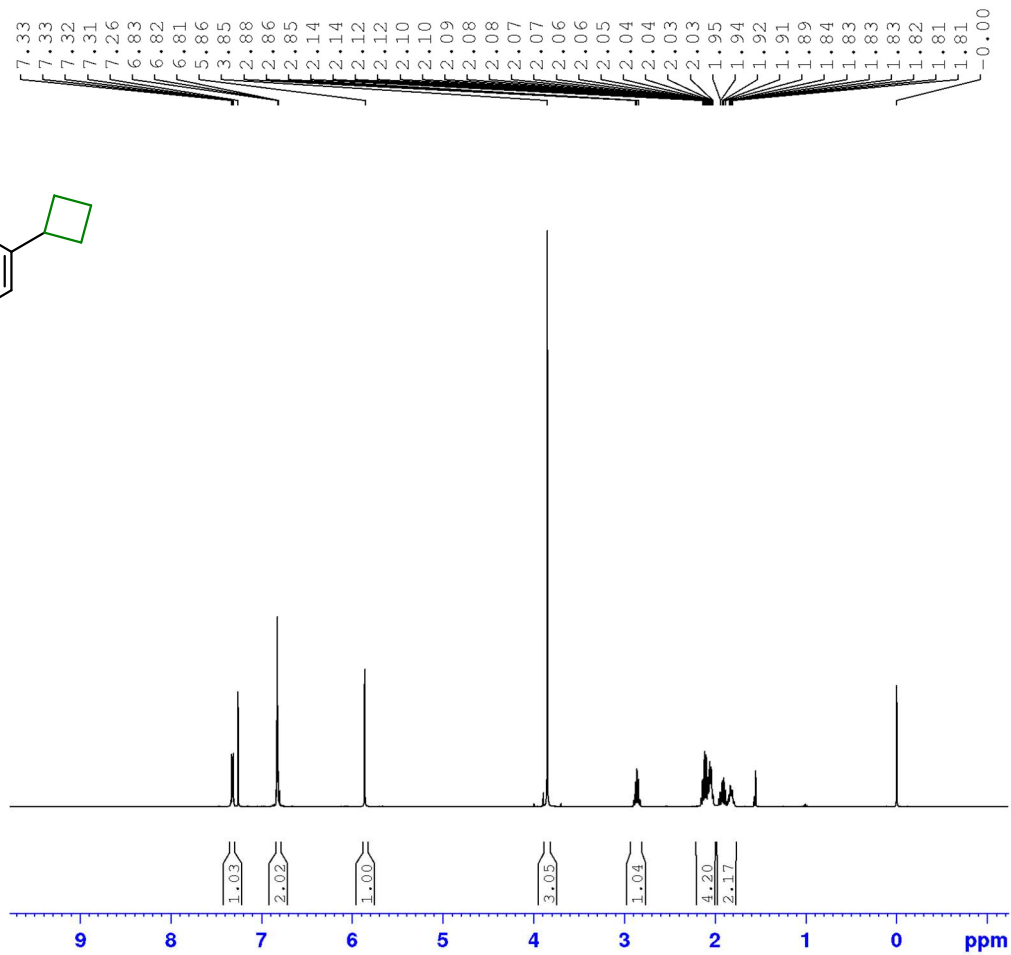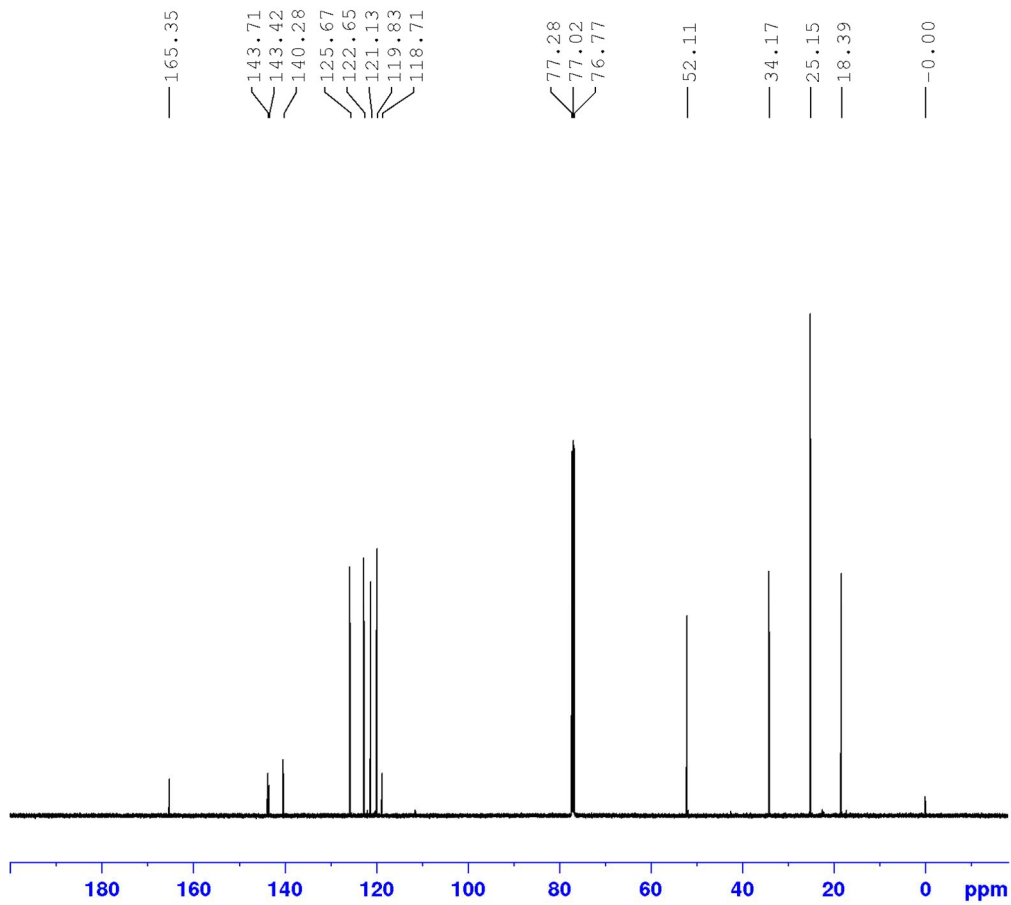

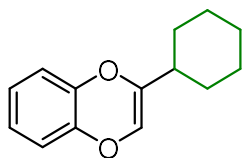

5d

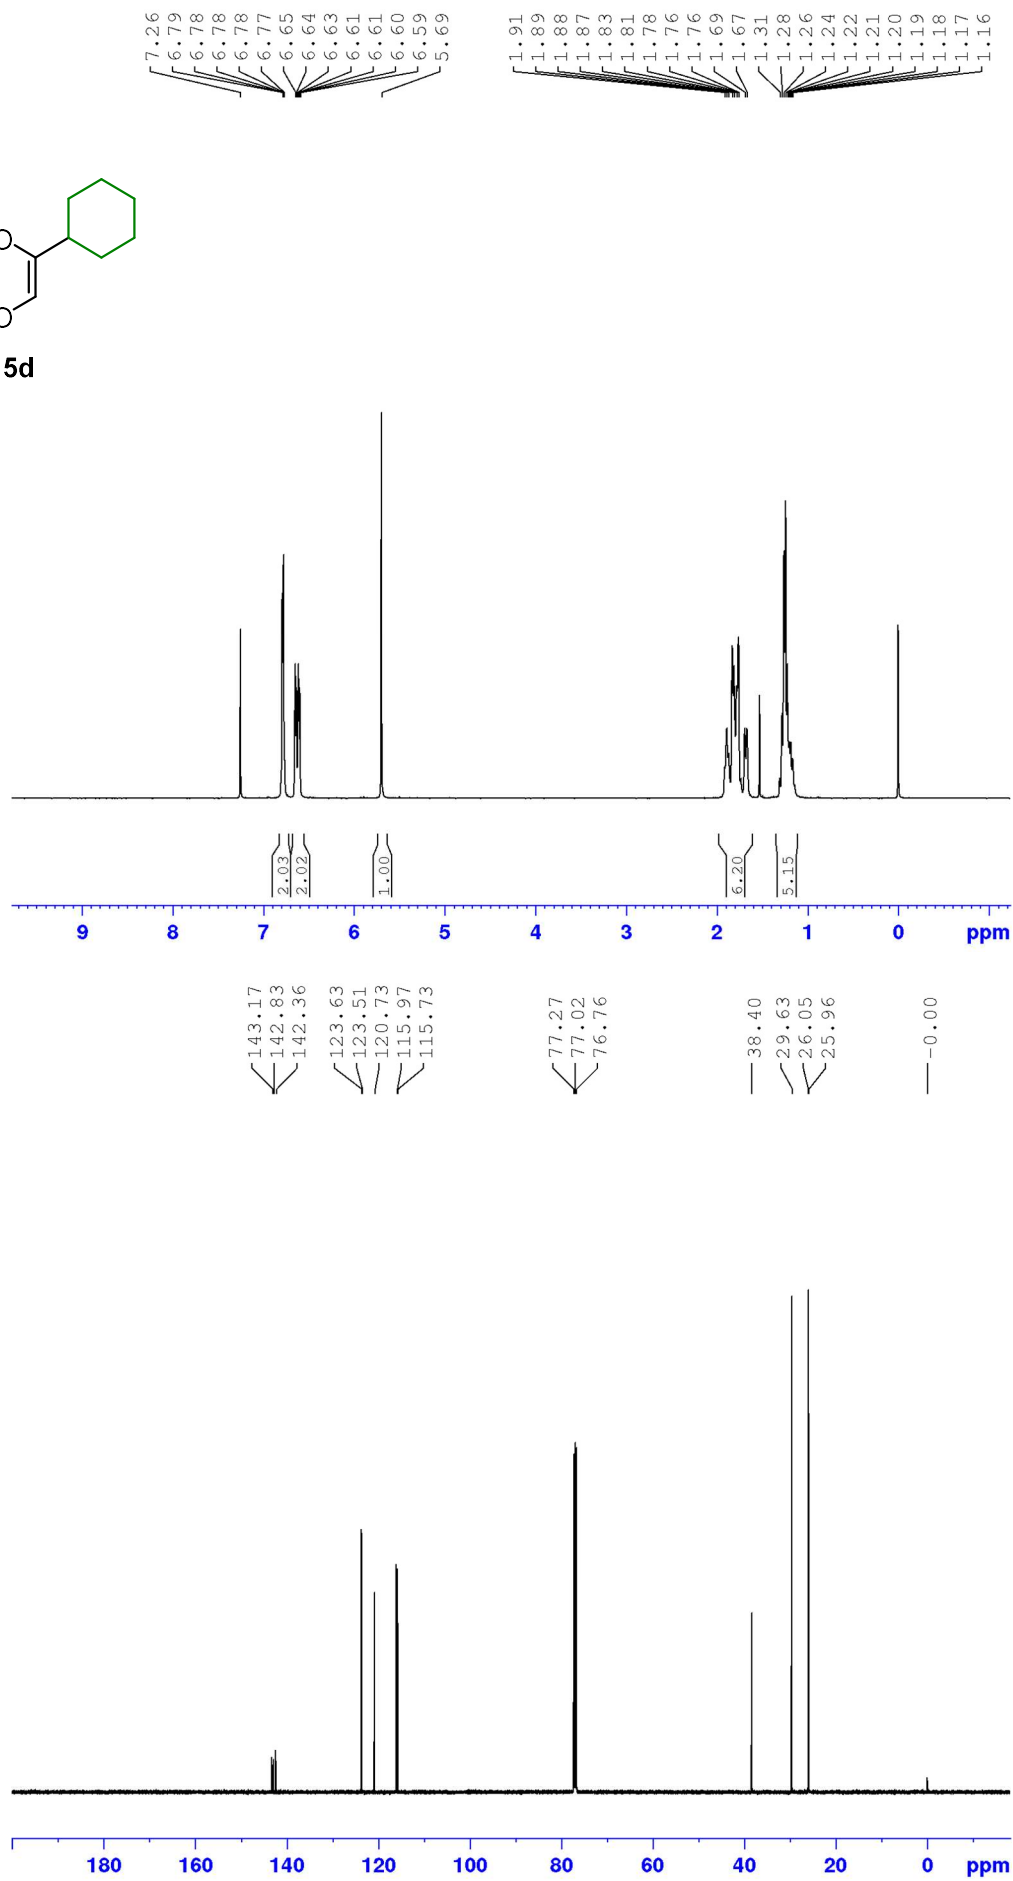

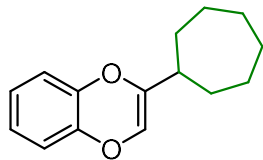

5e

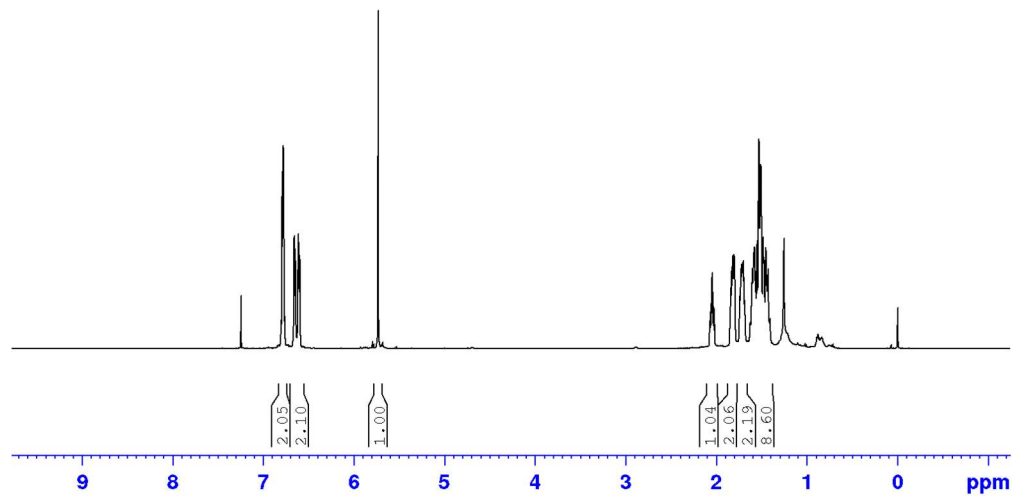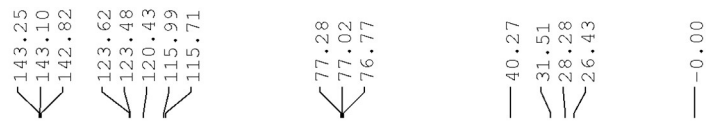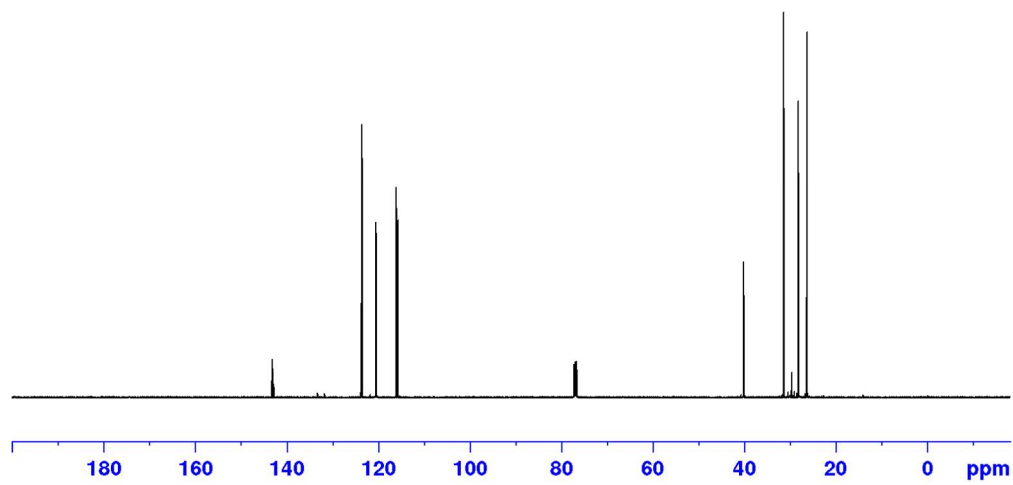



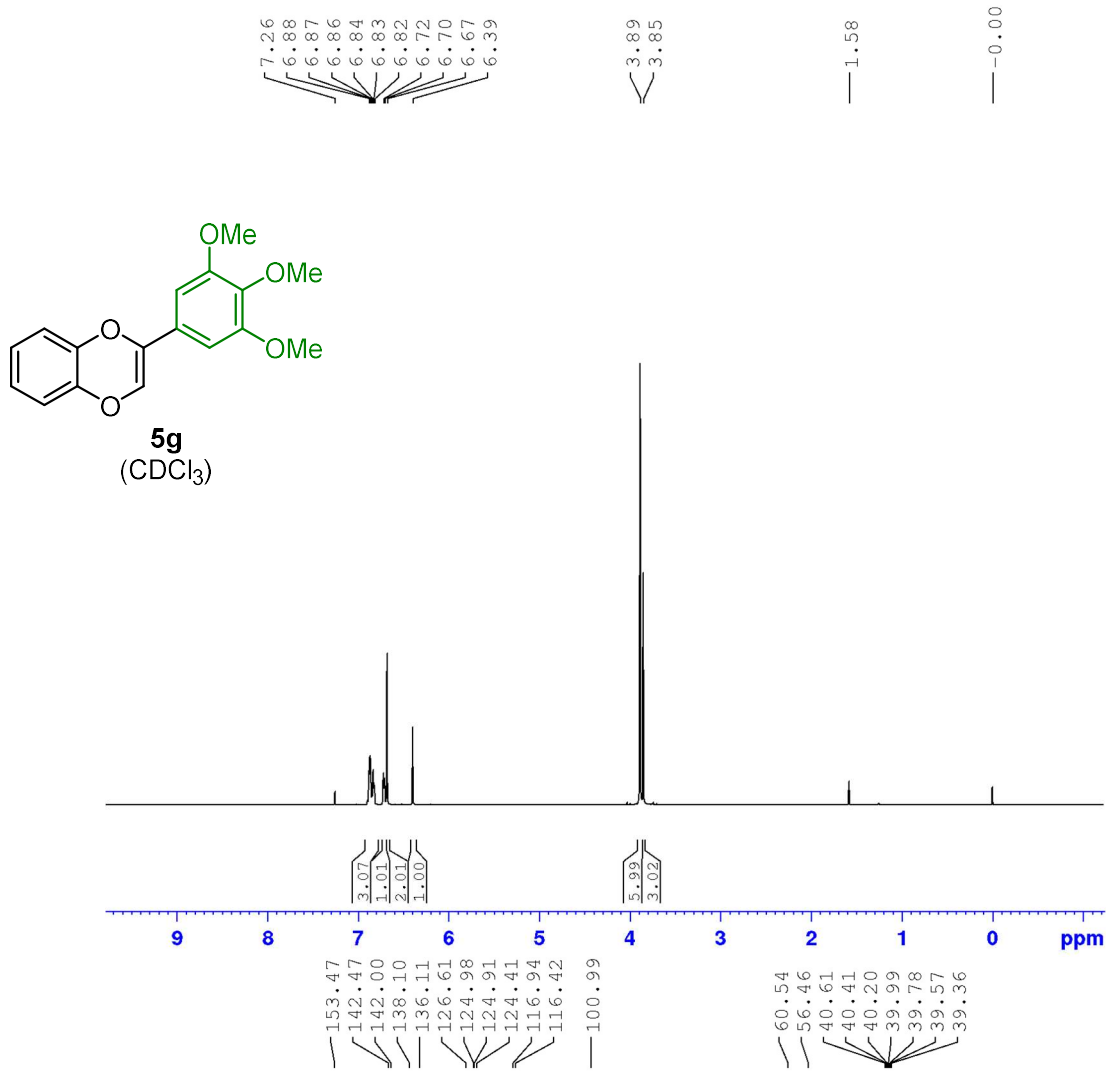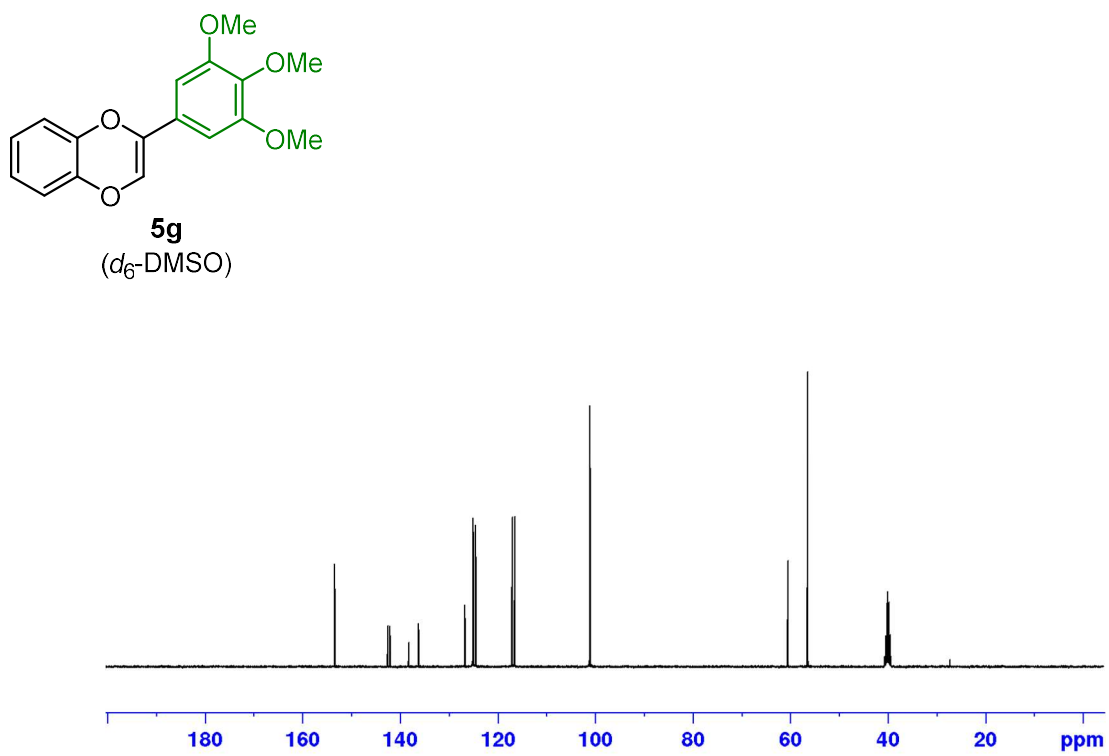

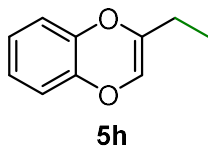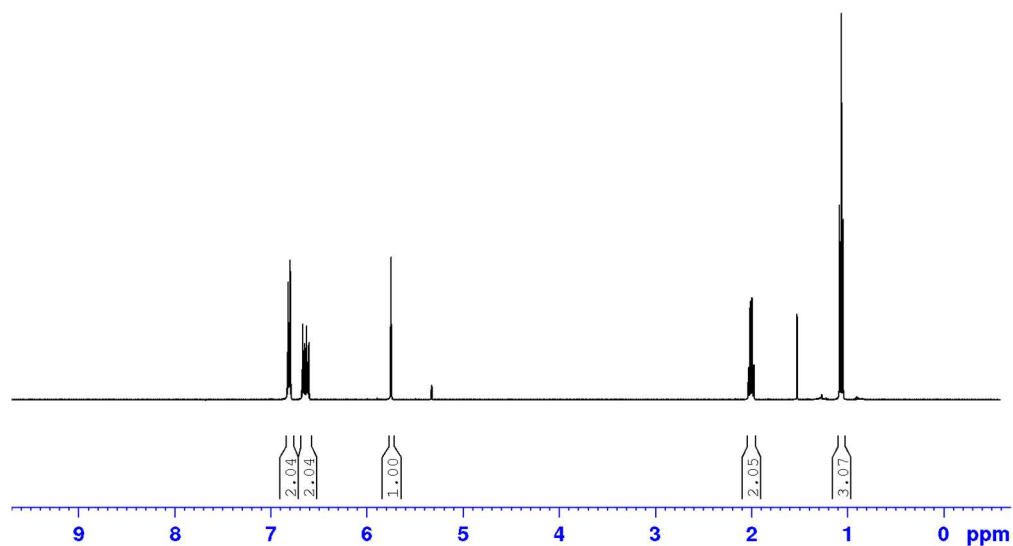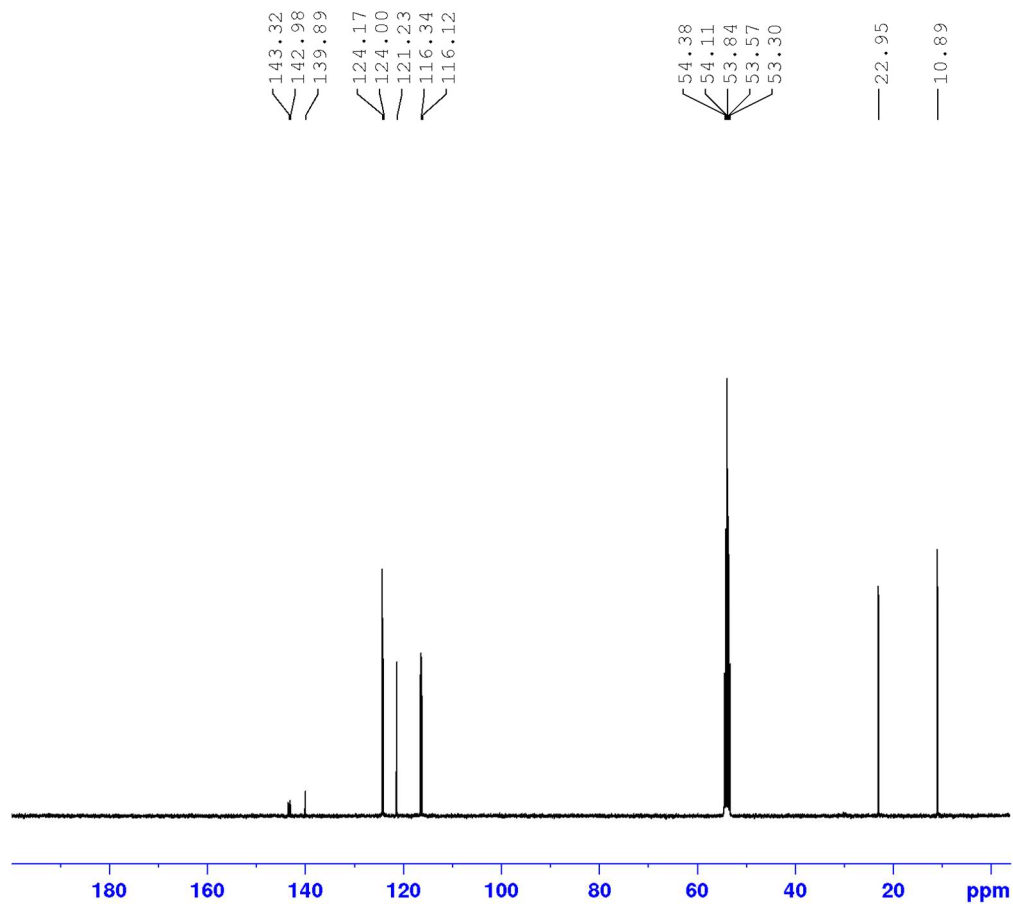

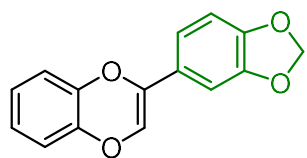

5i

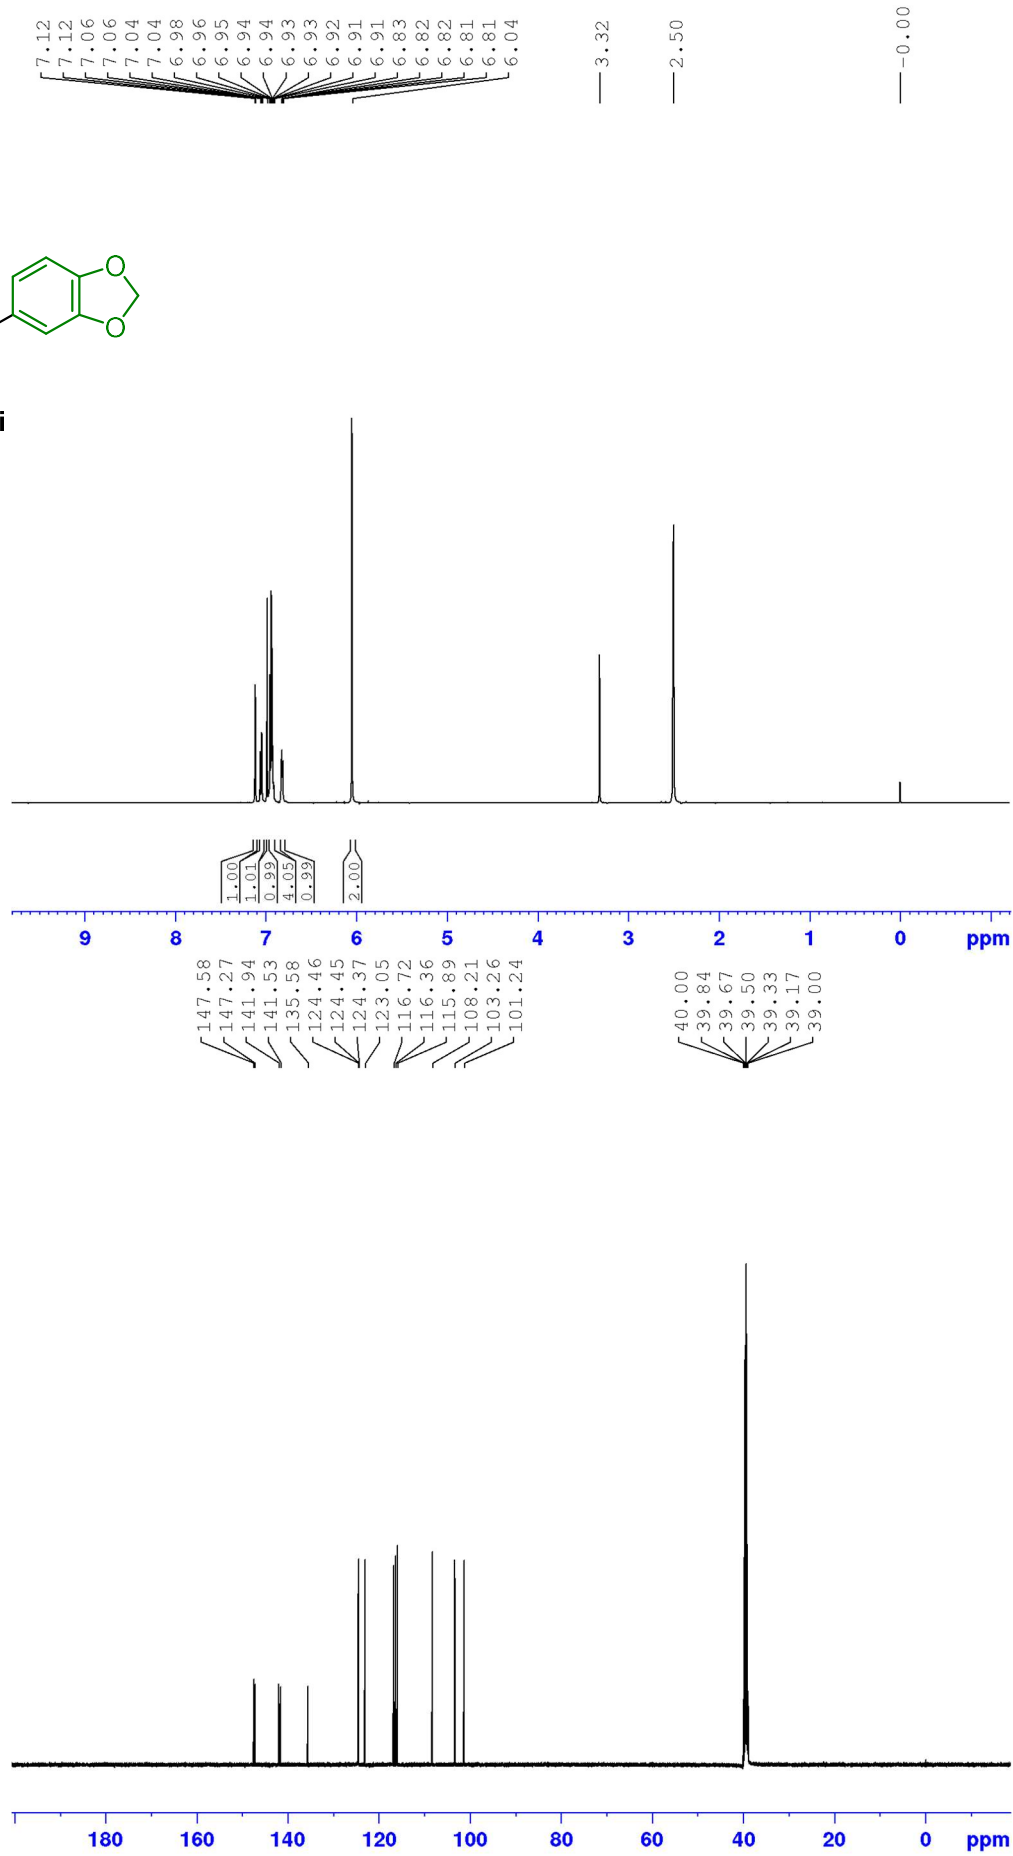

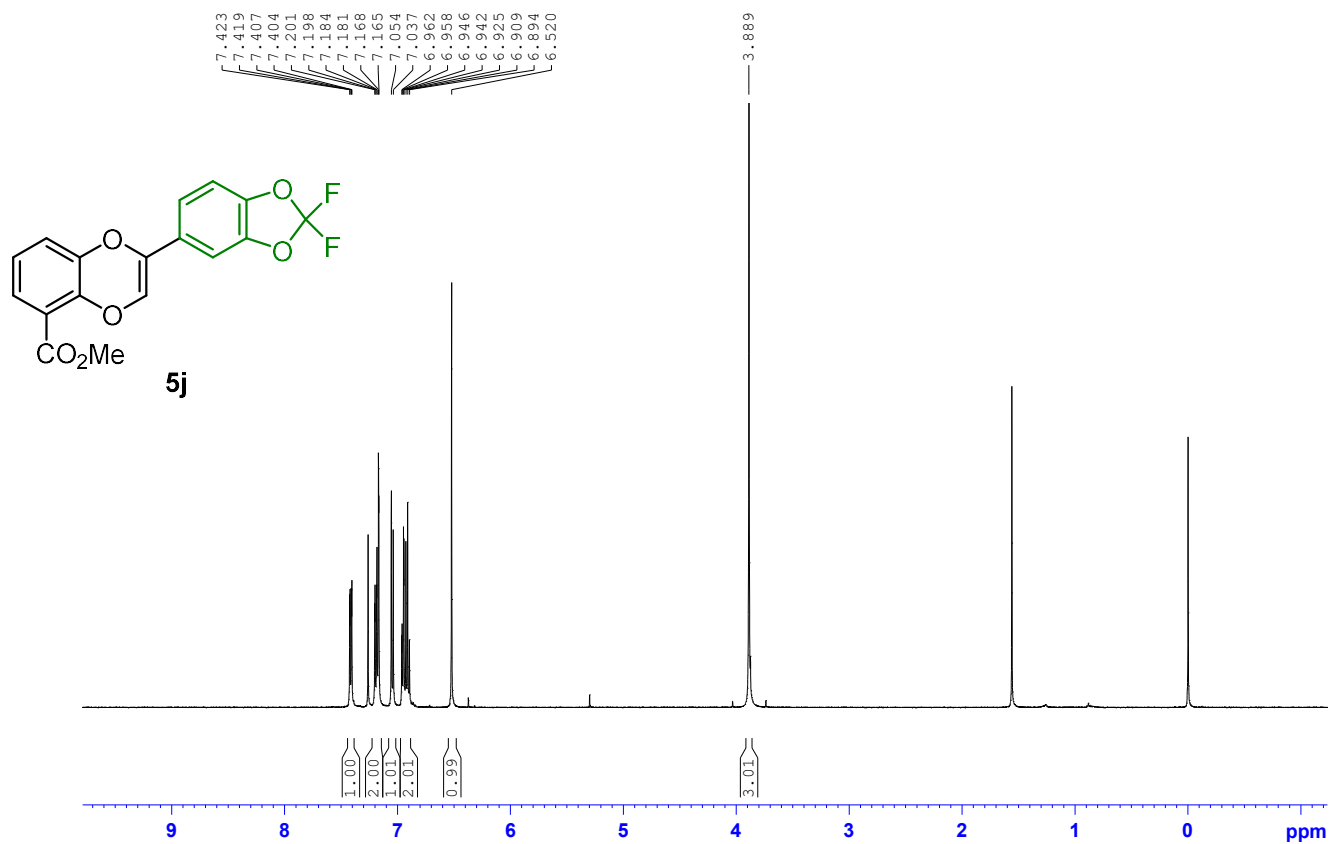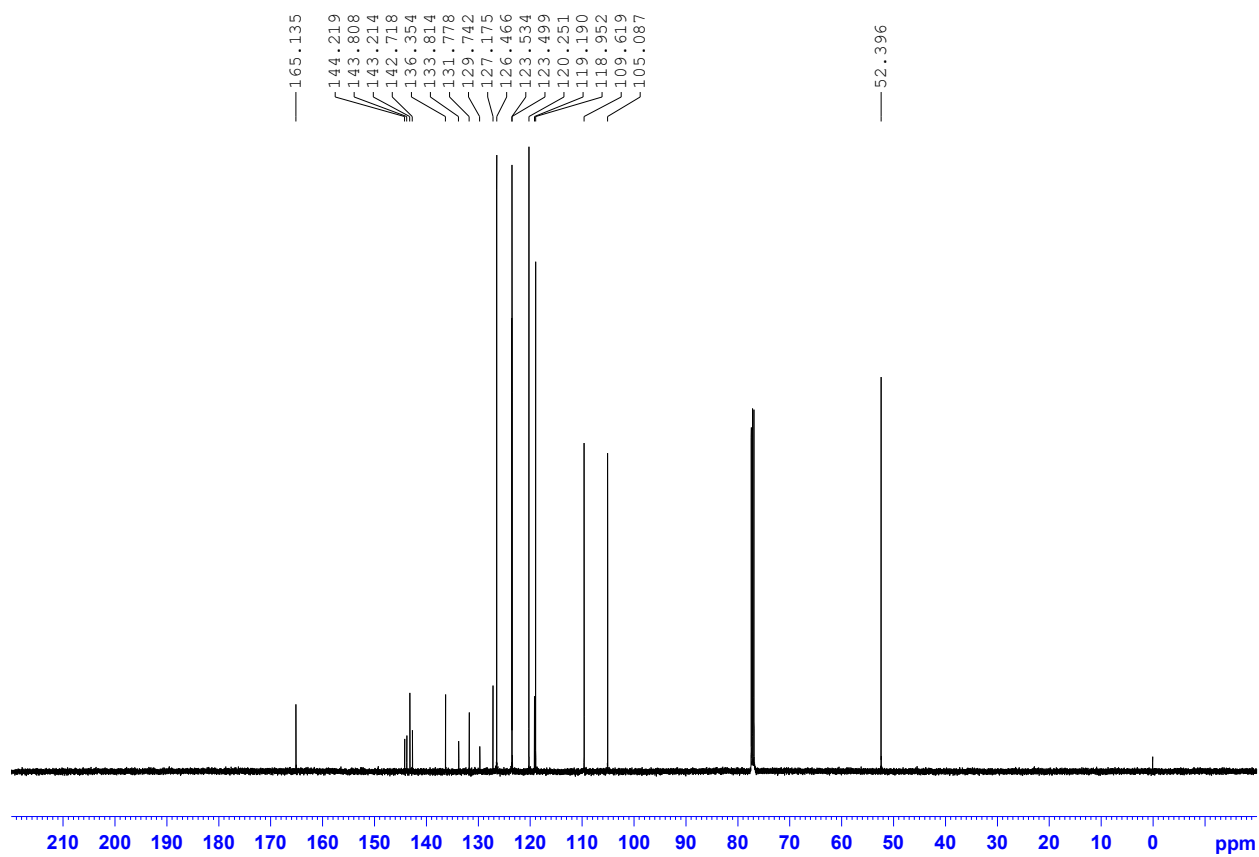

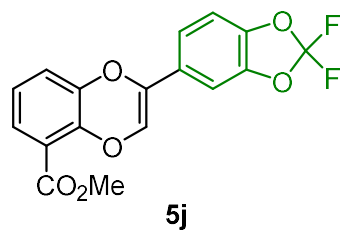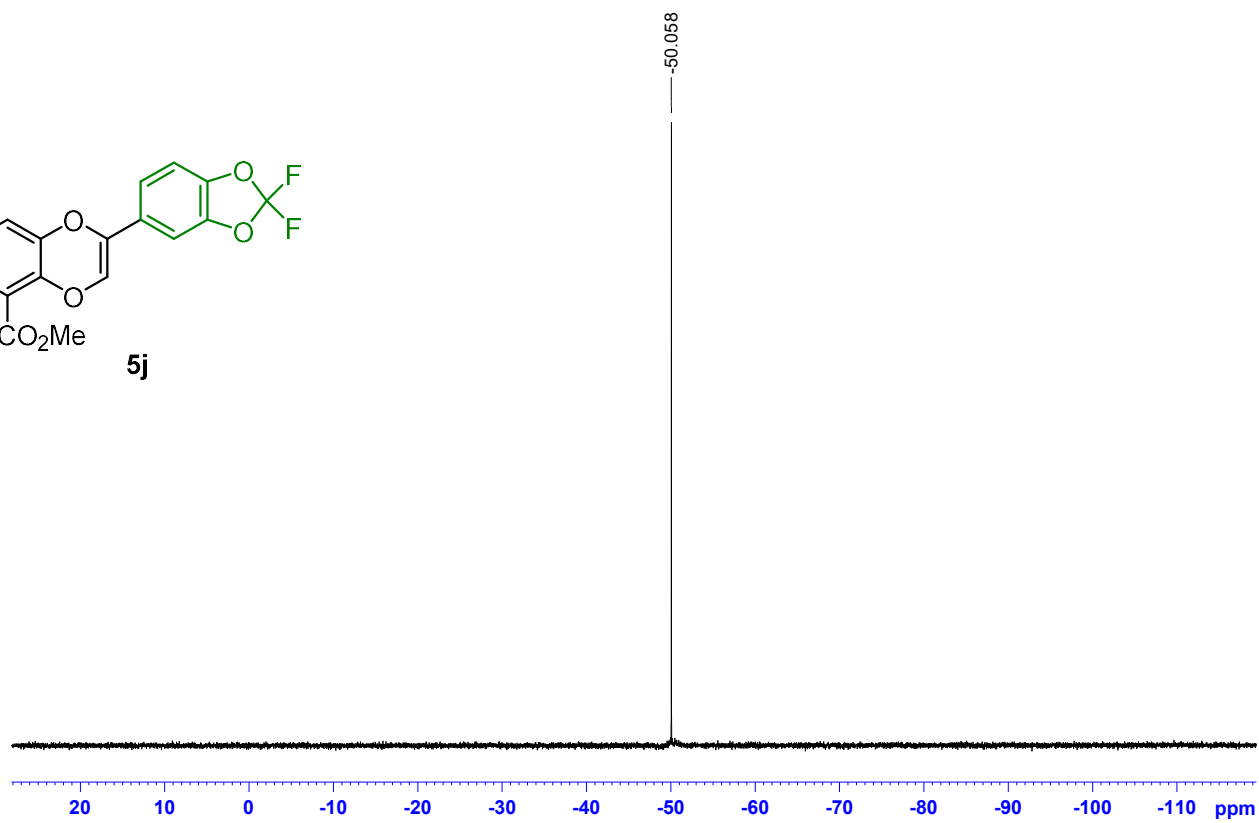

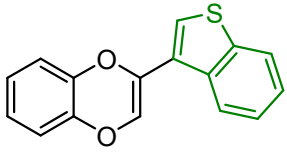

**5k**

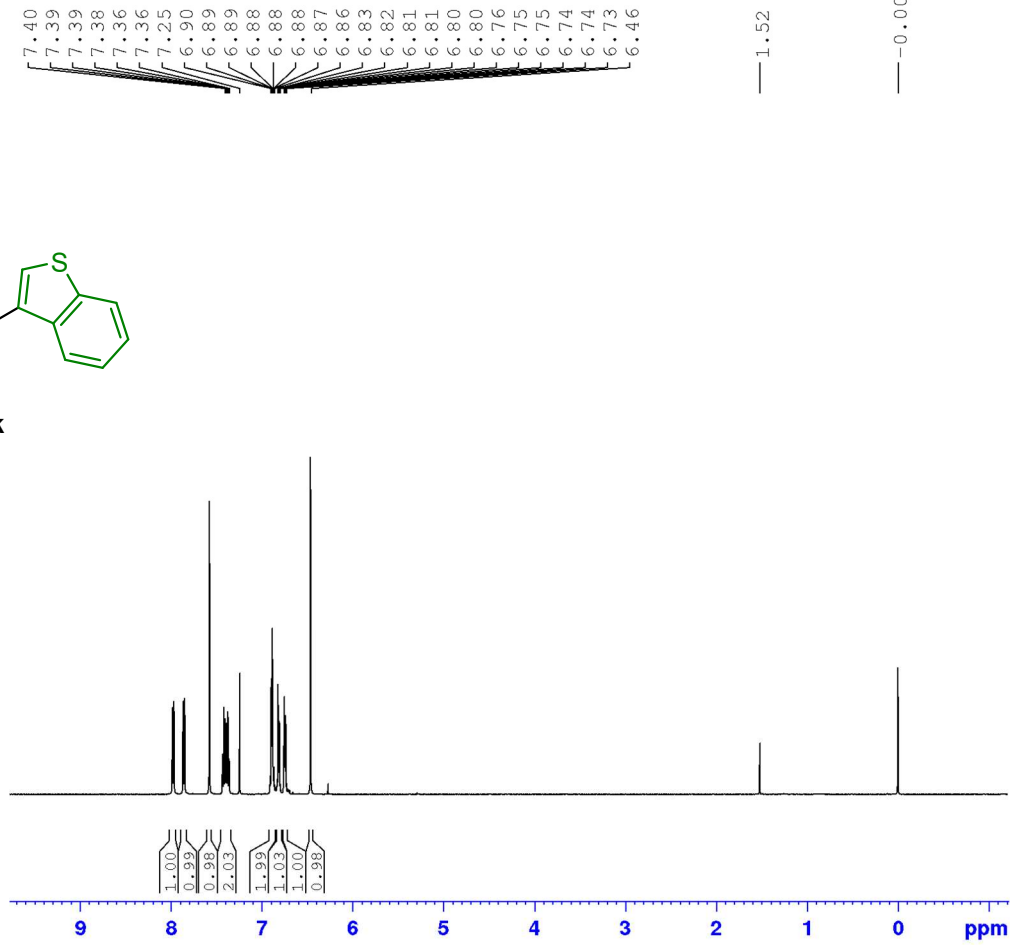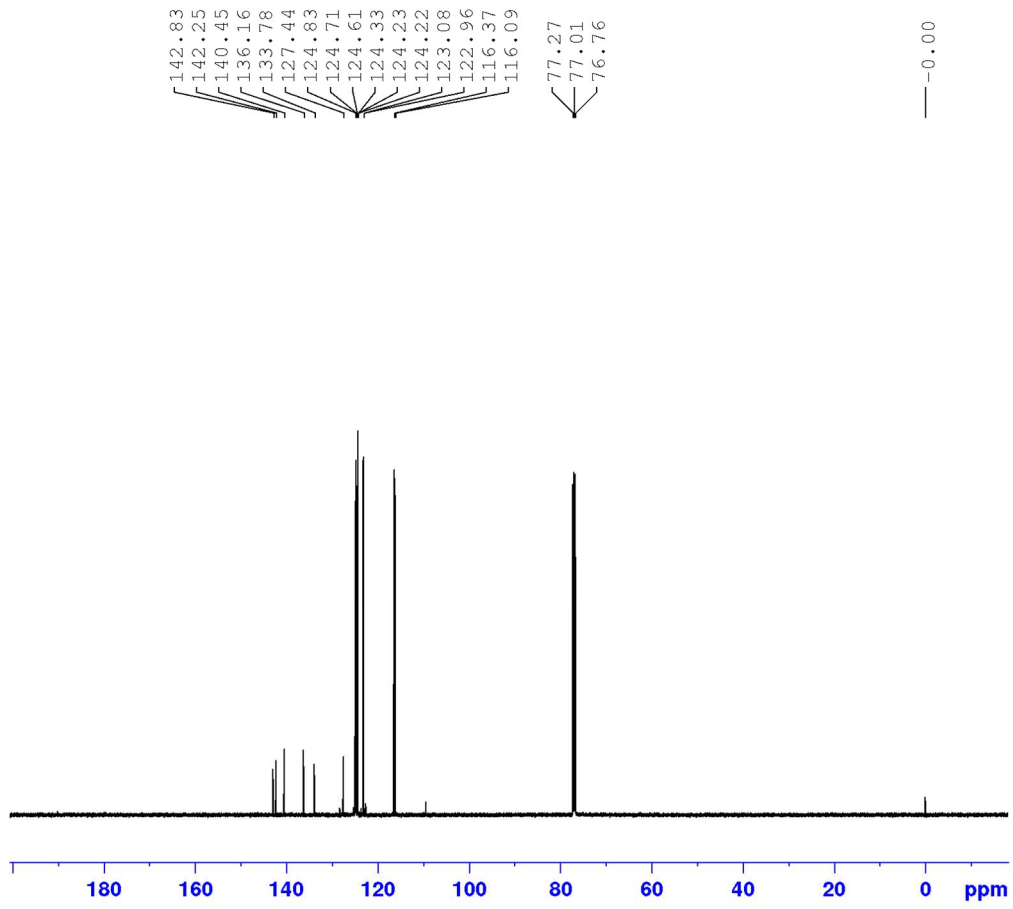

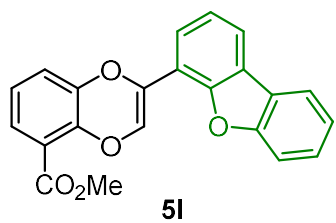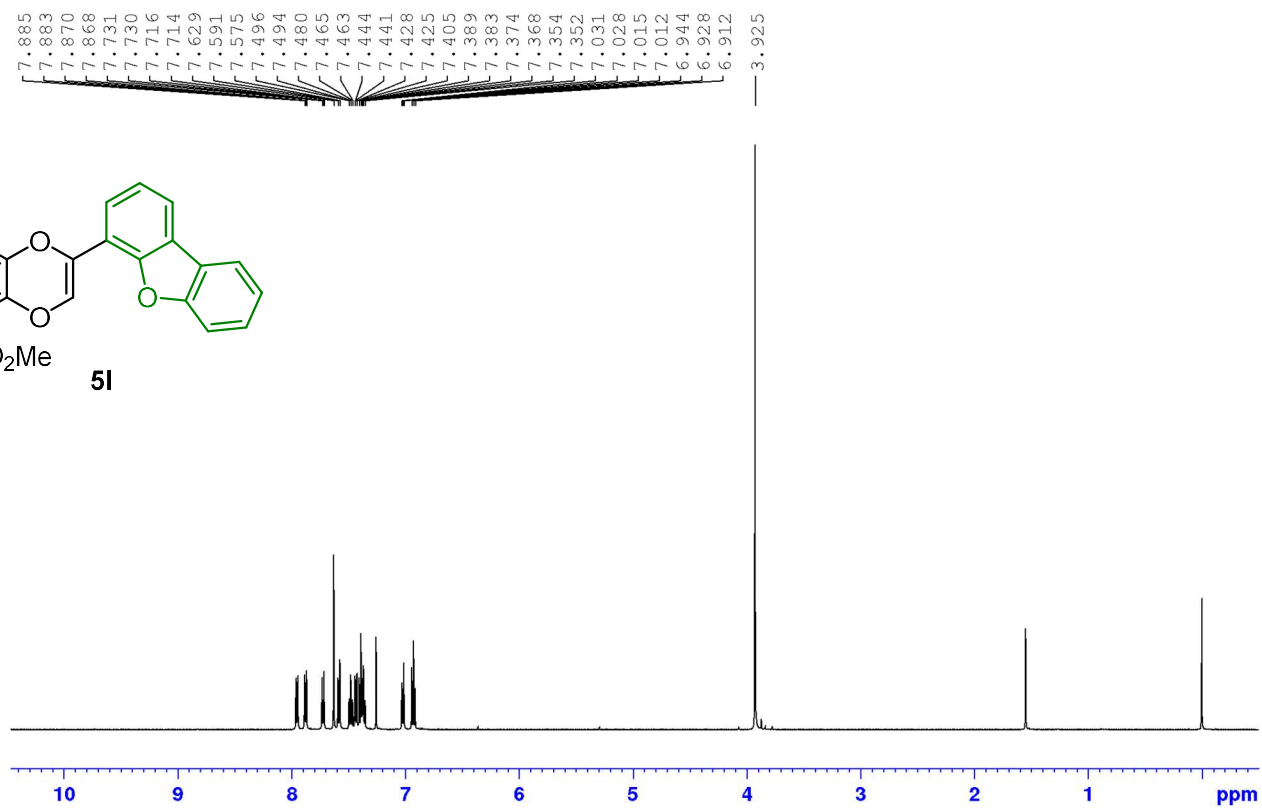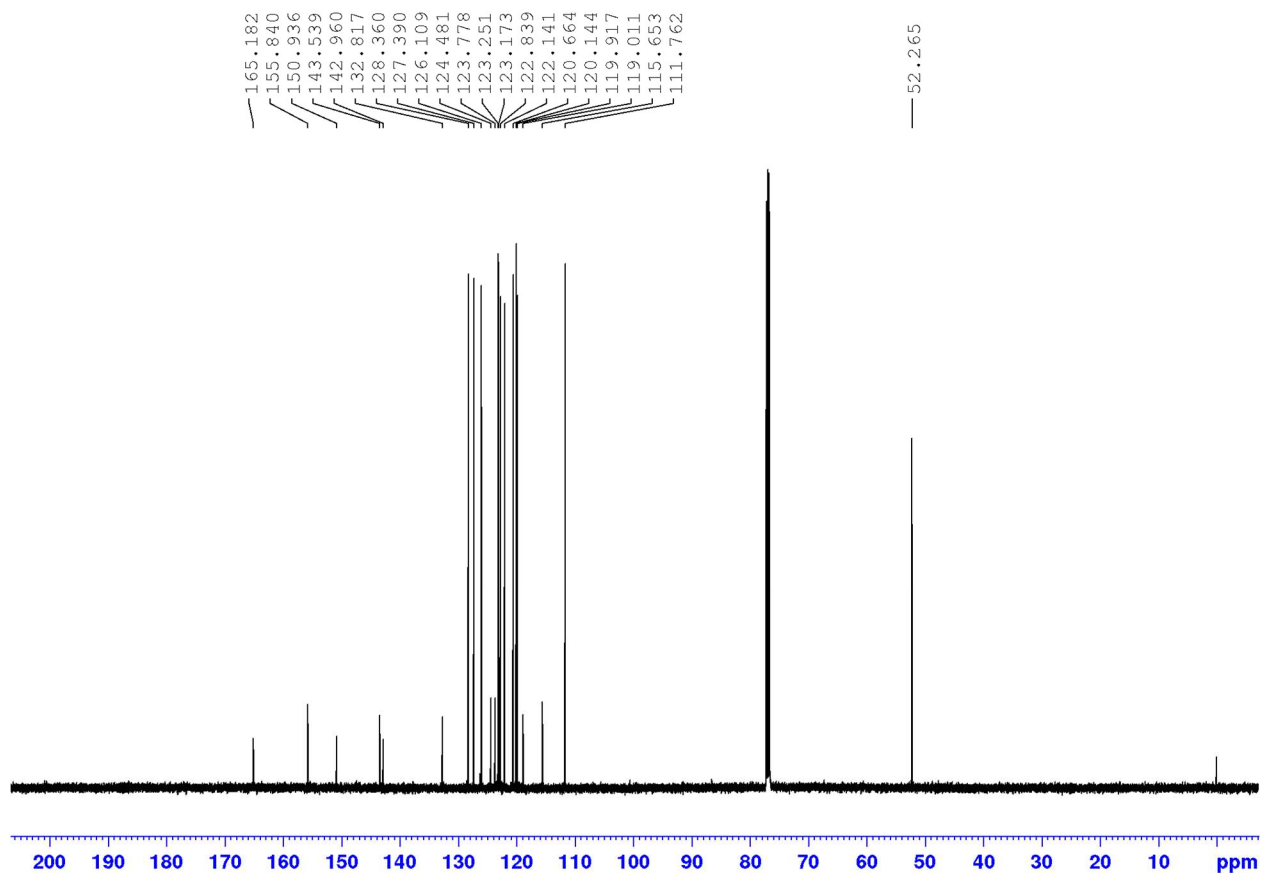

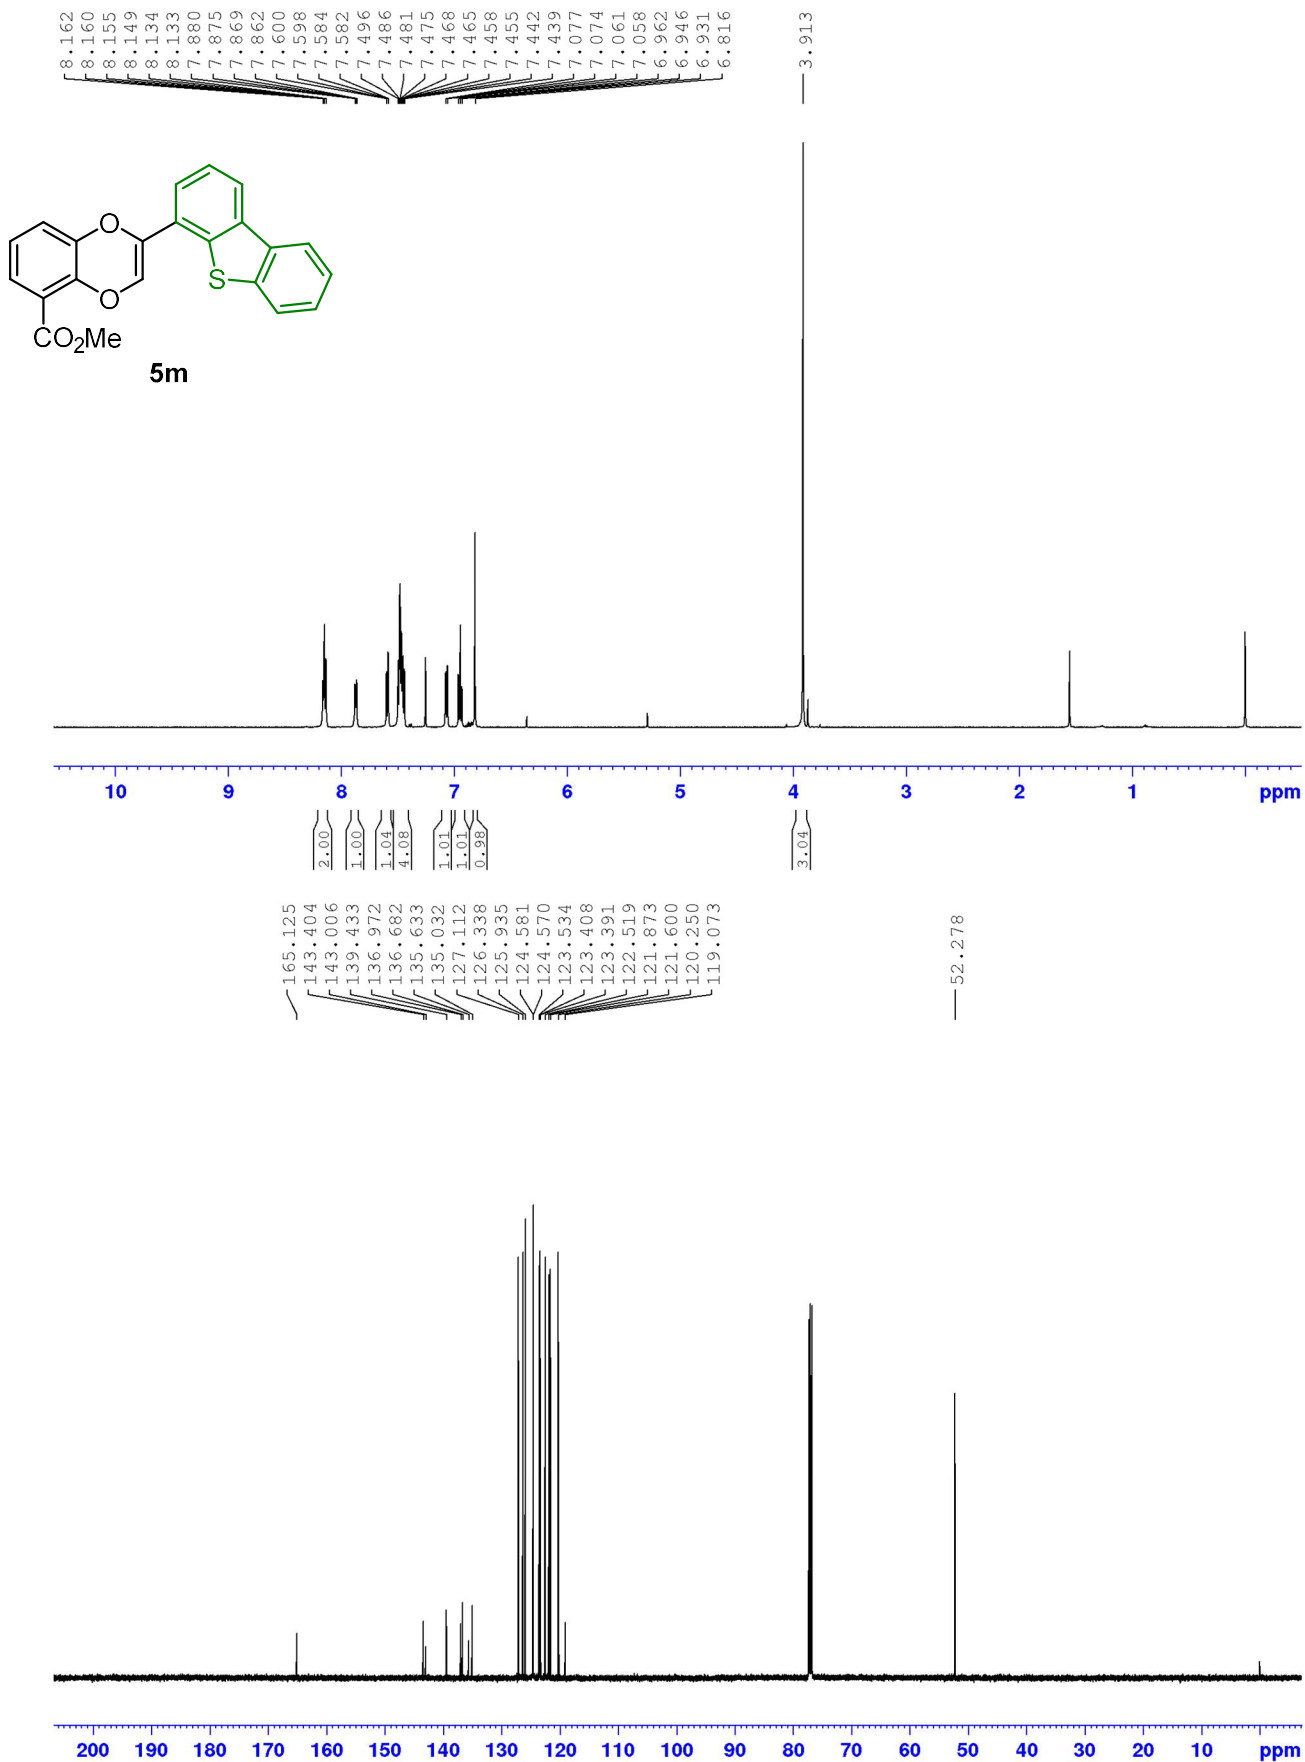



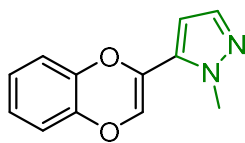

5n

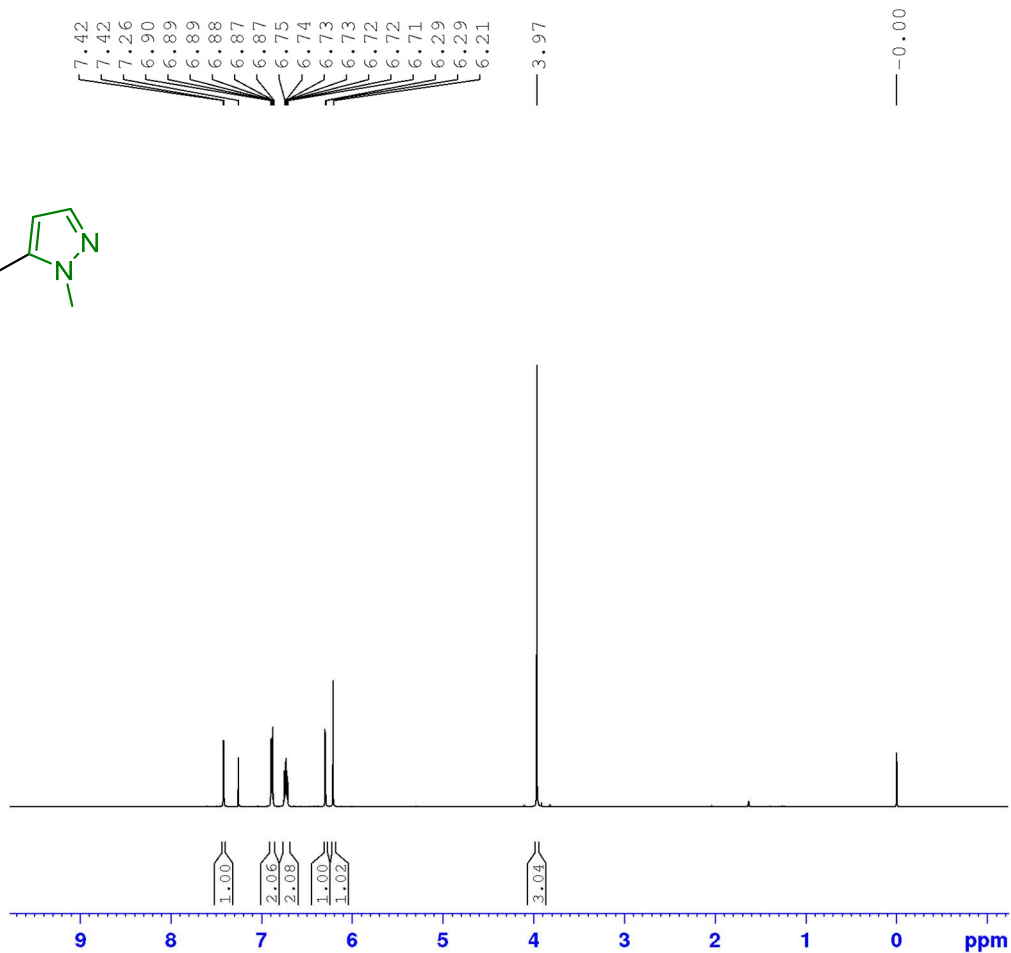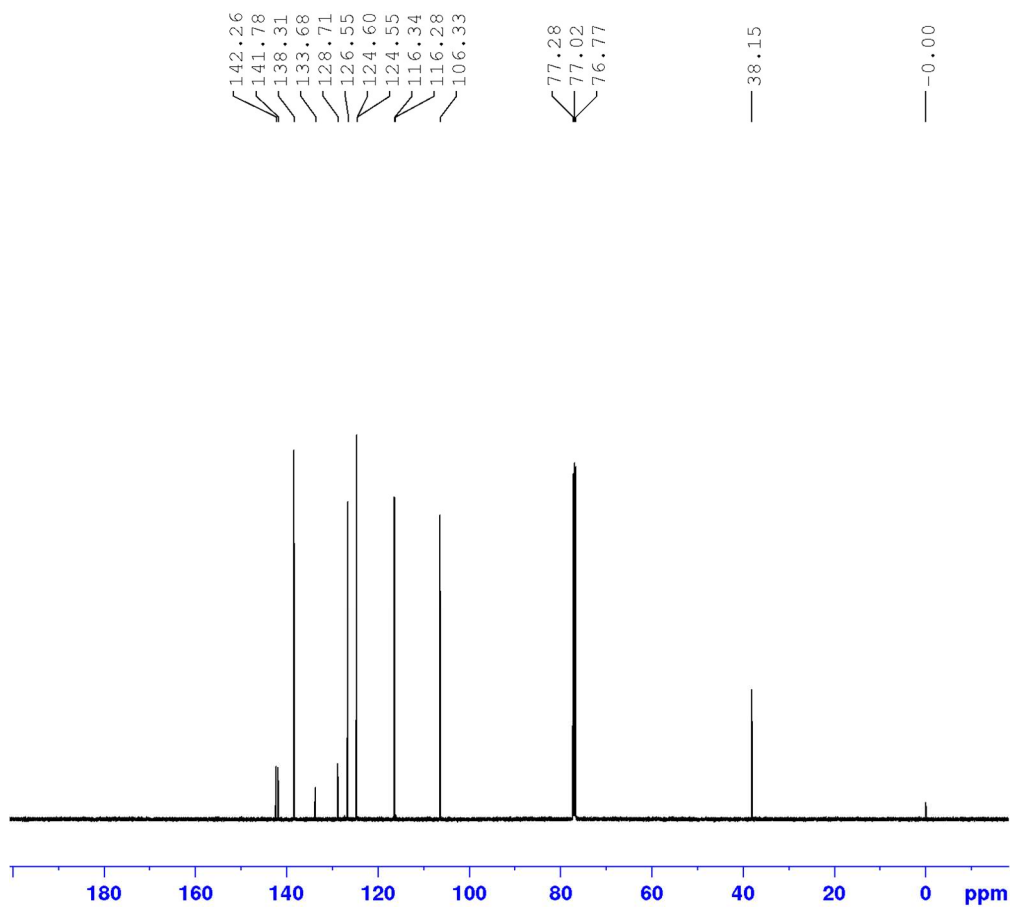

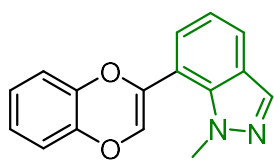

**5o**

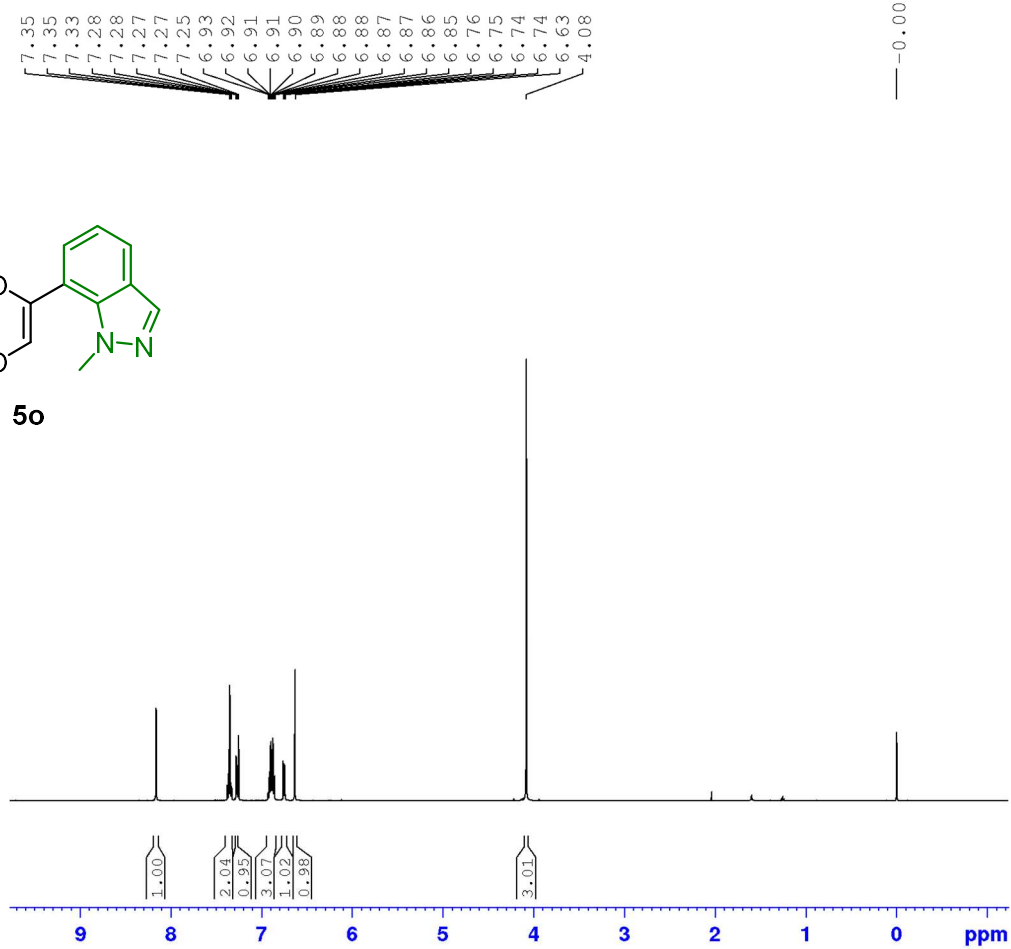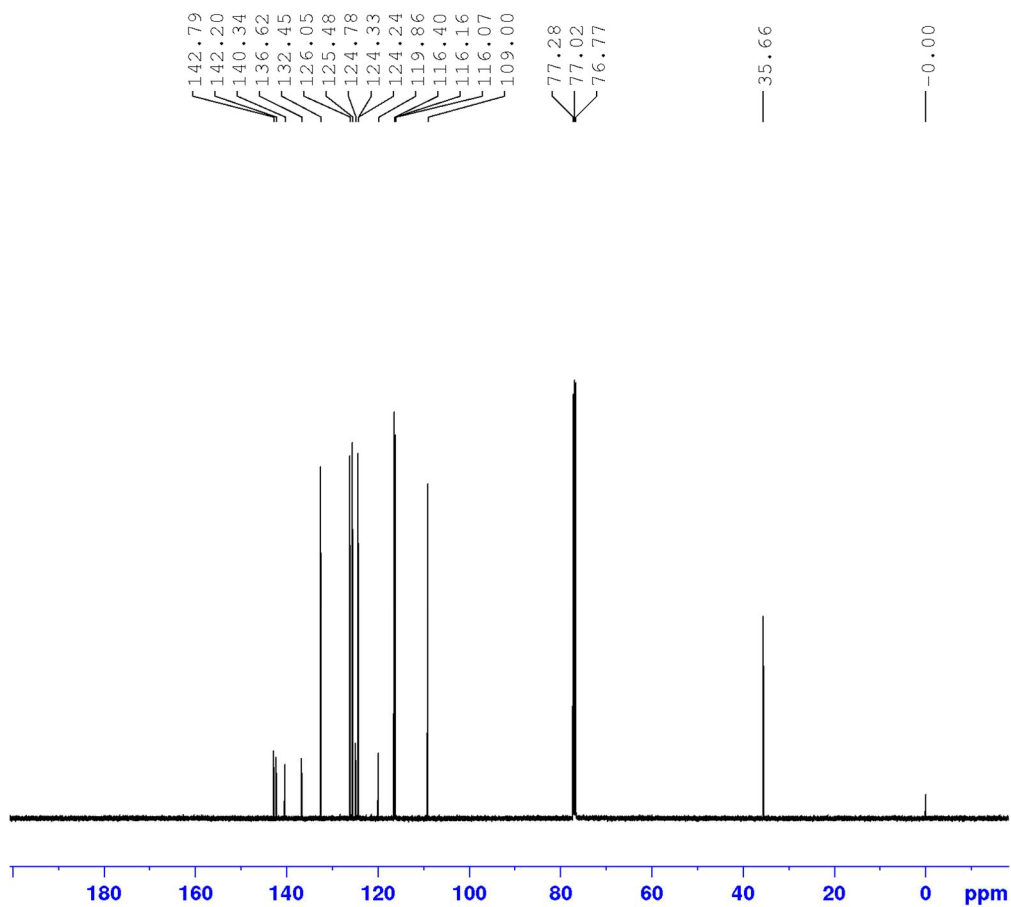

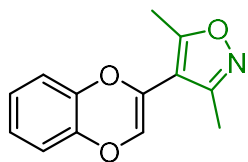

5p

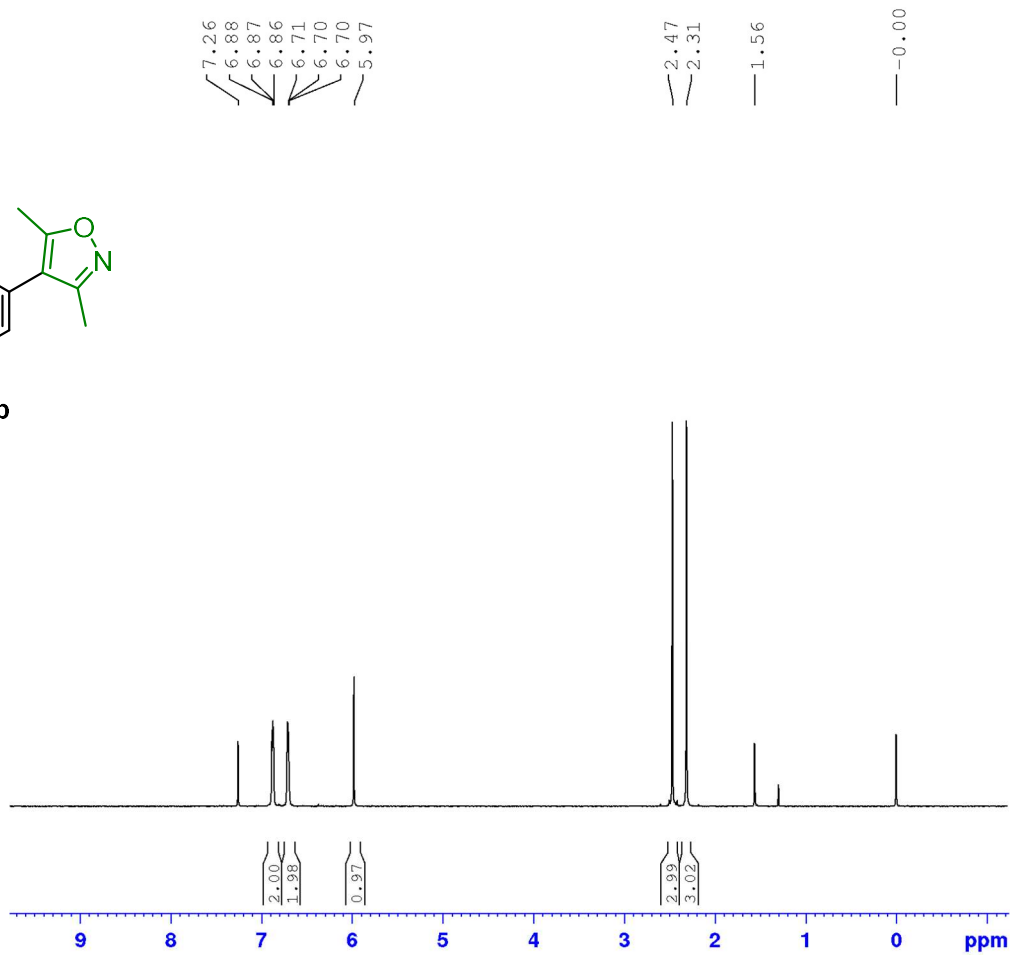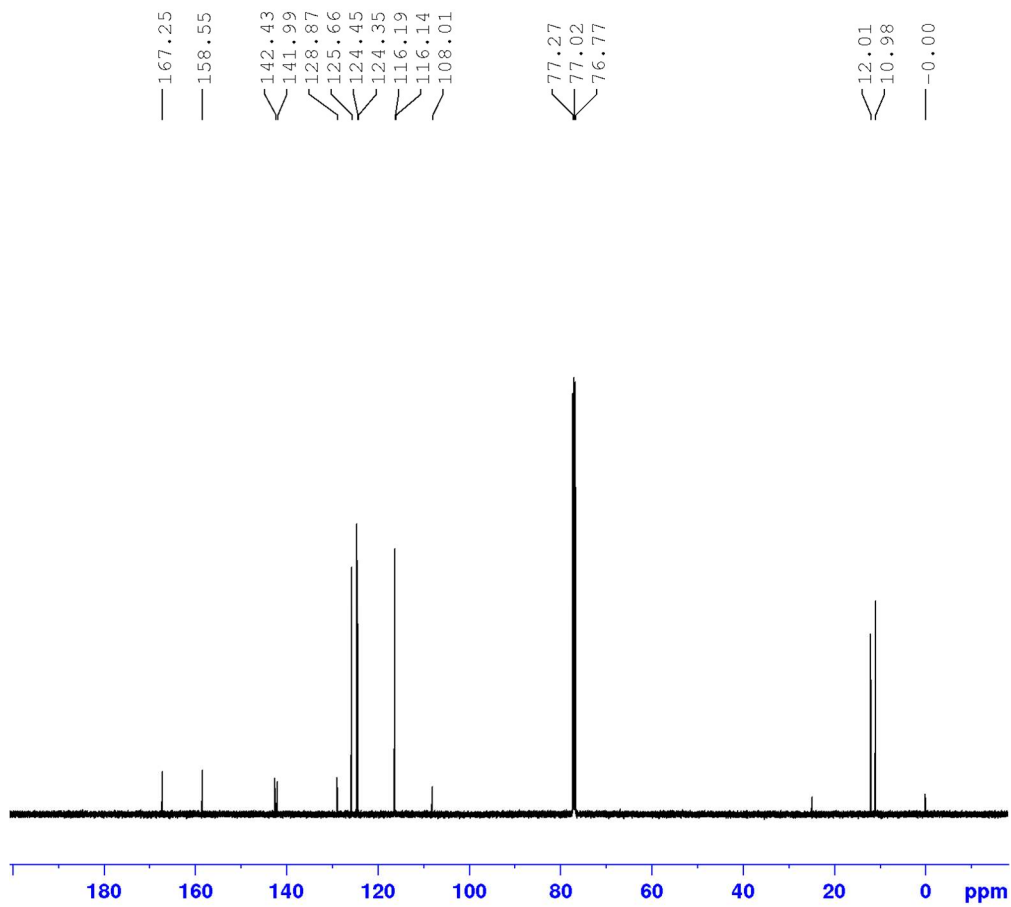

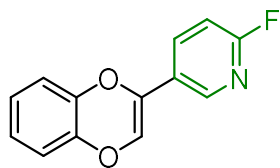

5q

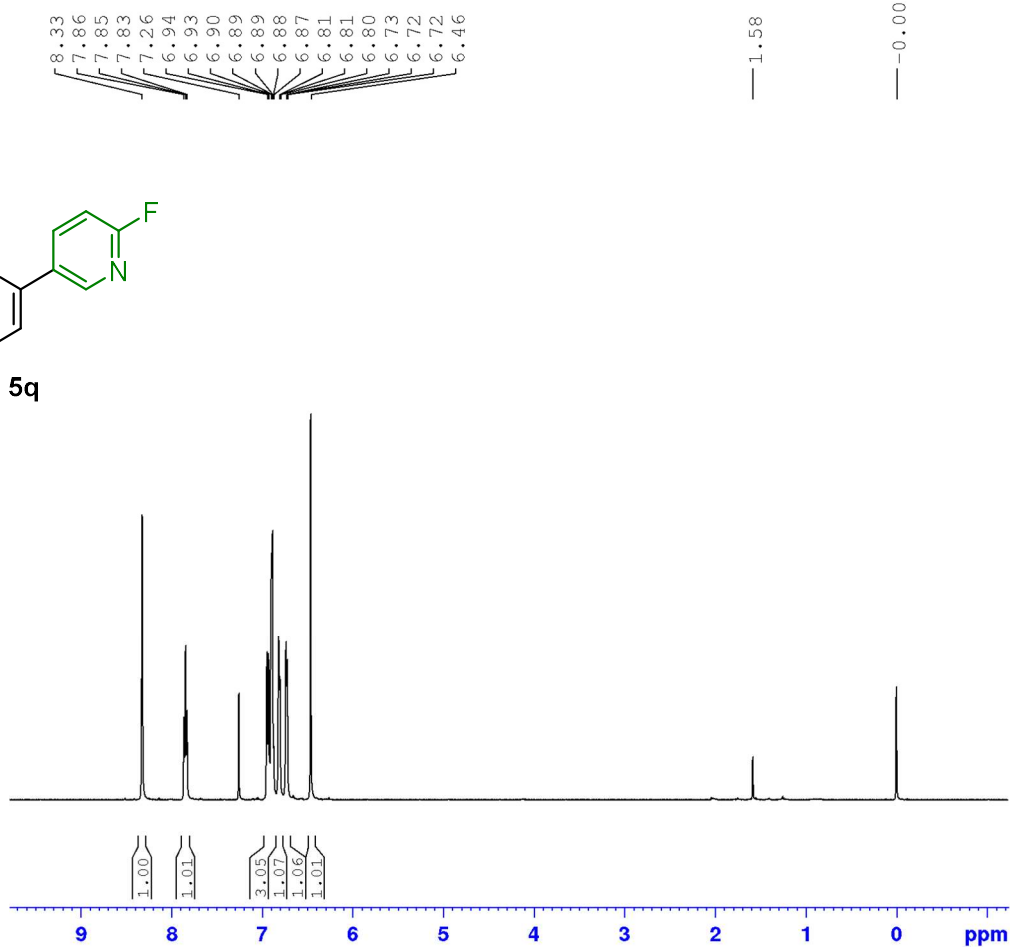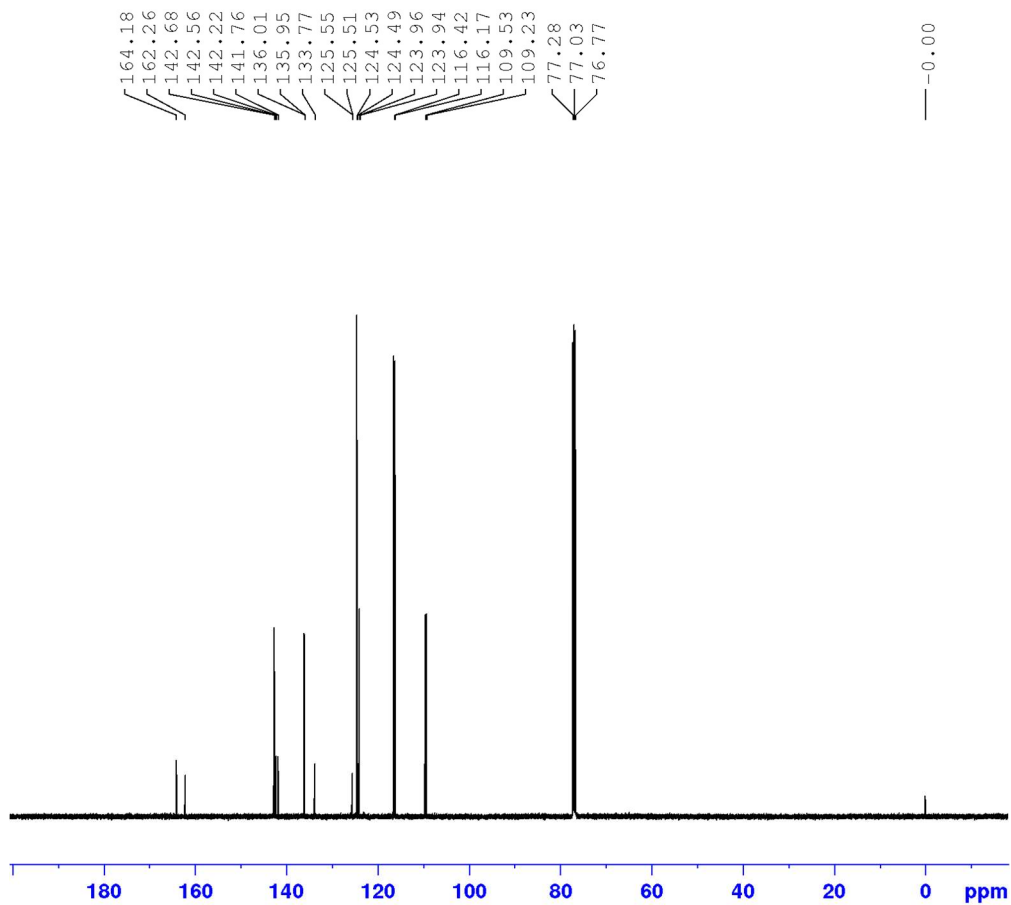

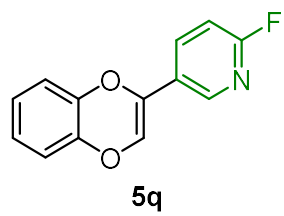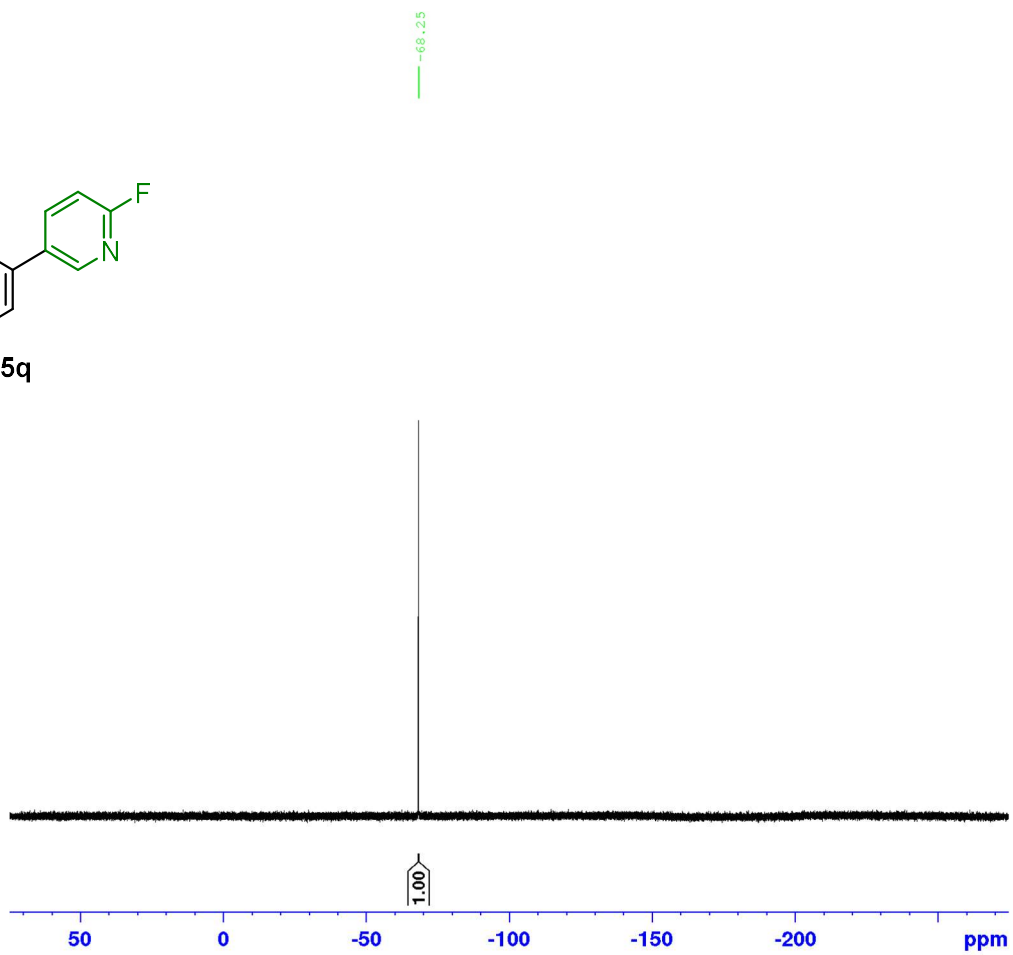

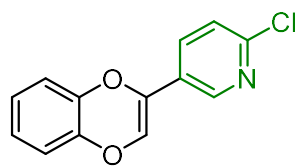

5r

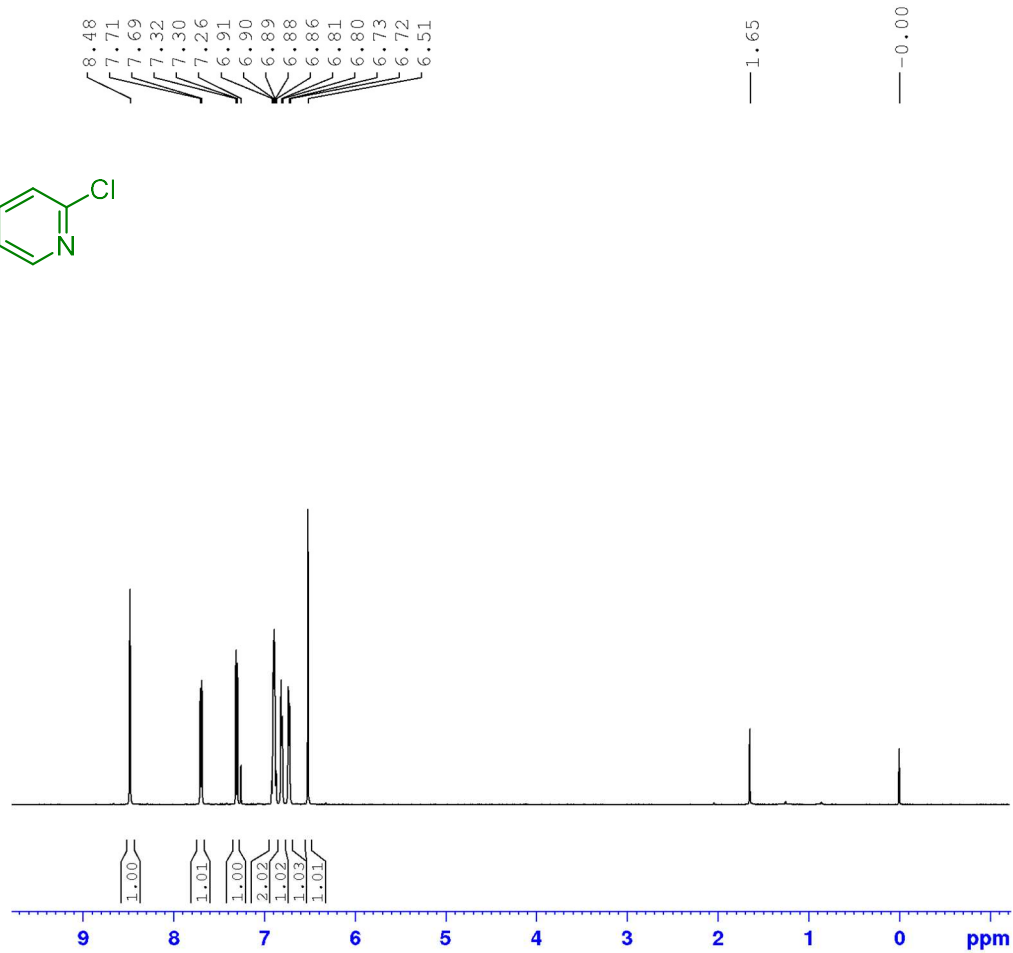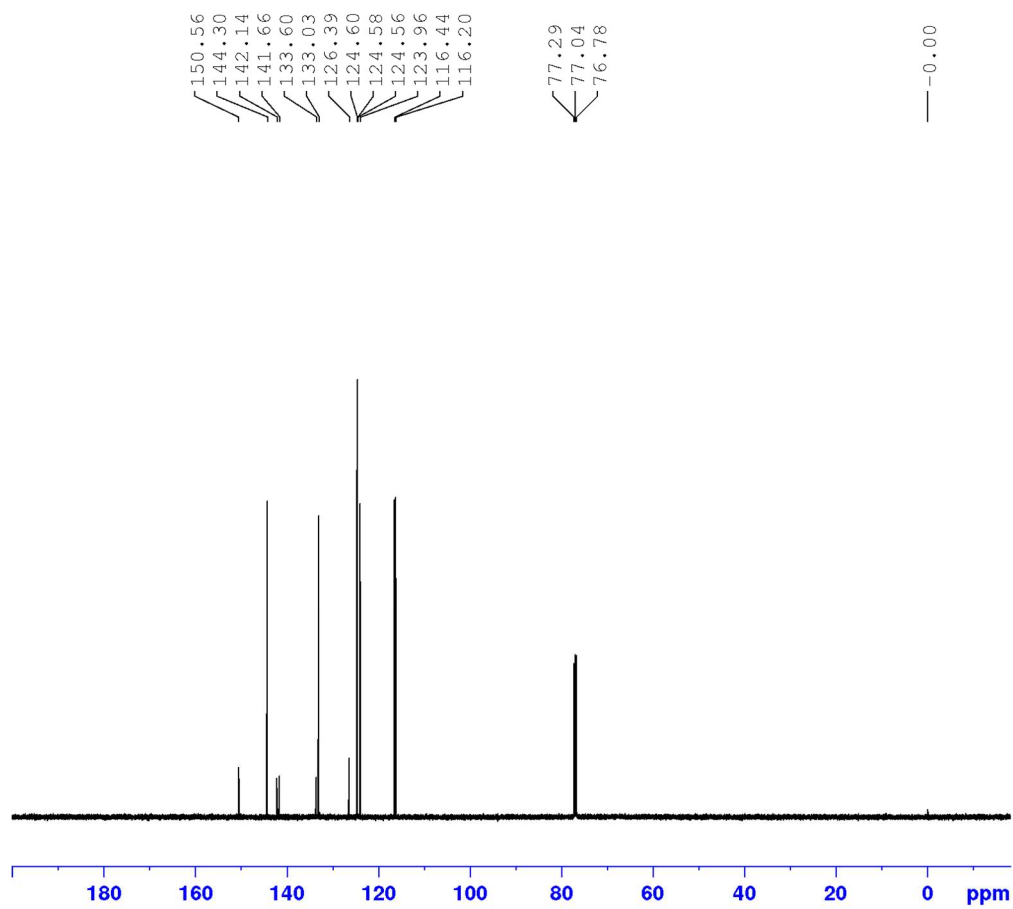

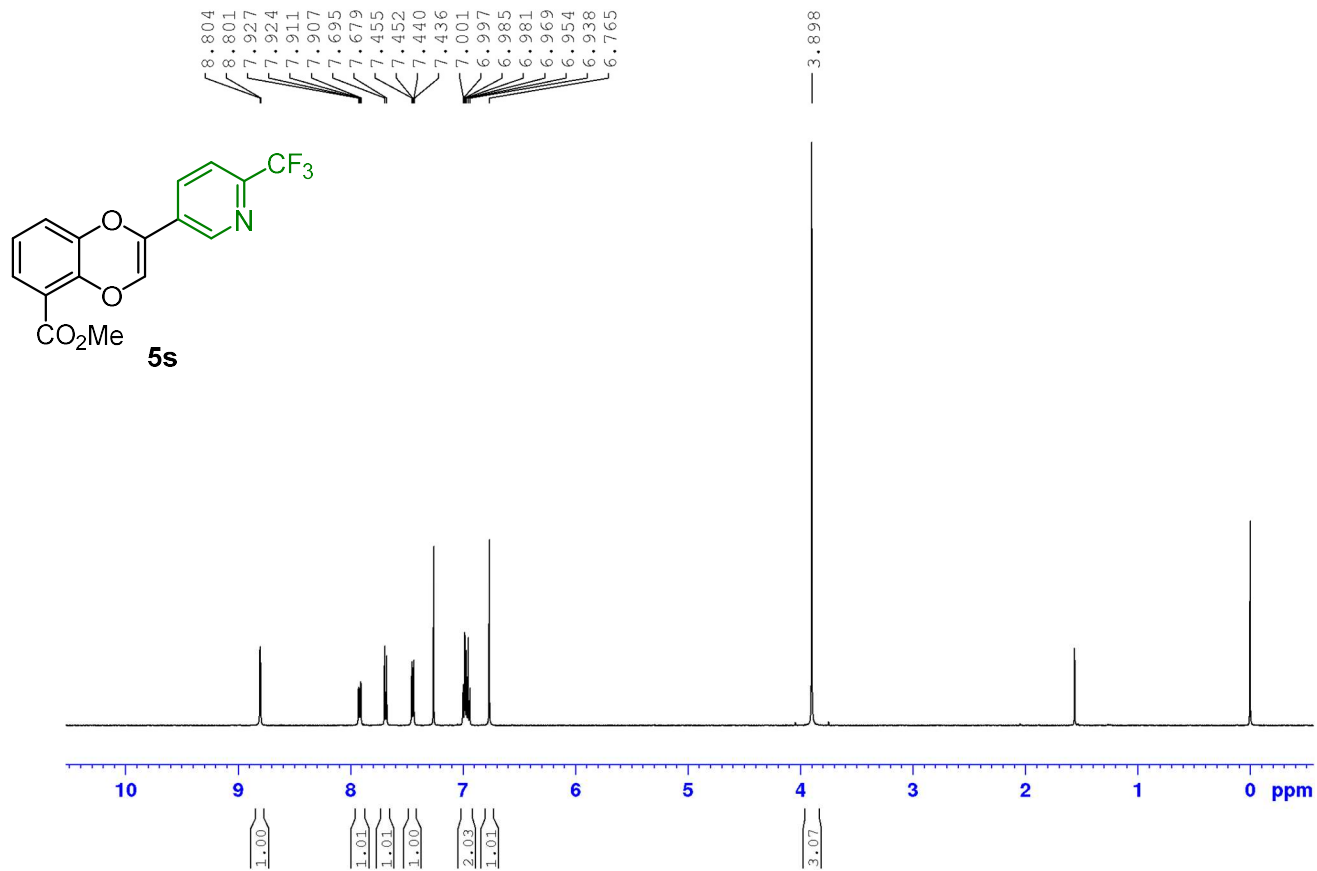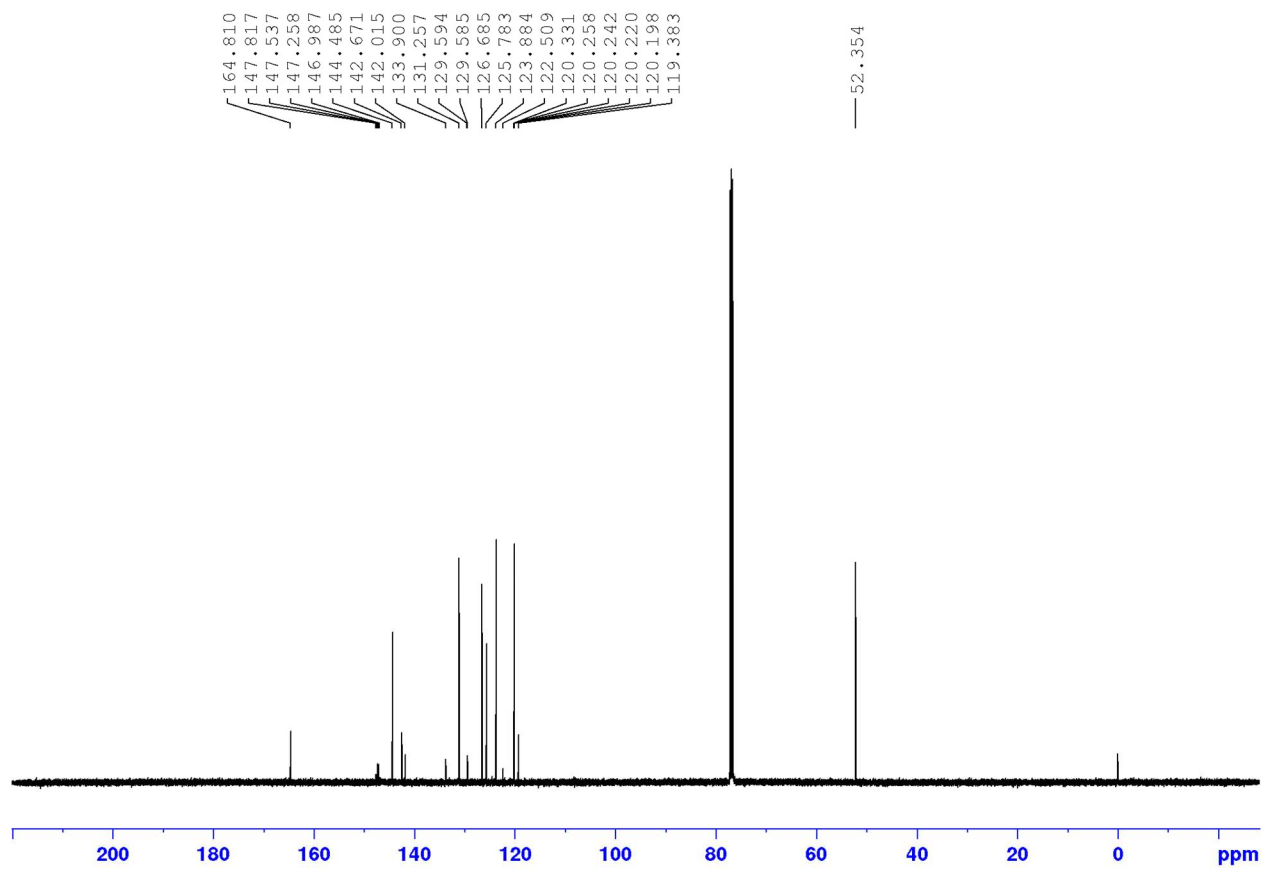

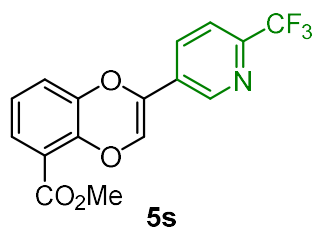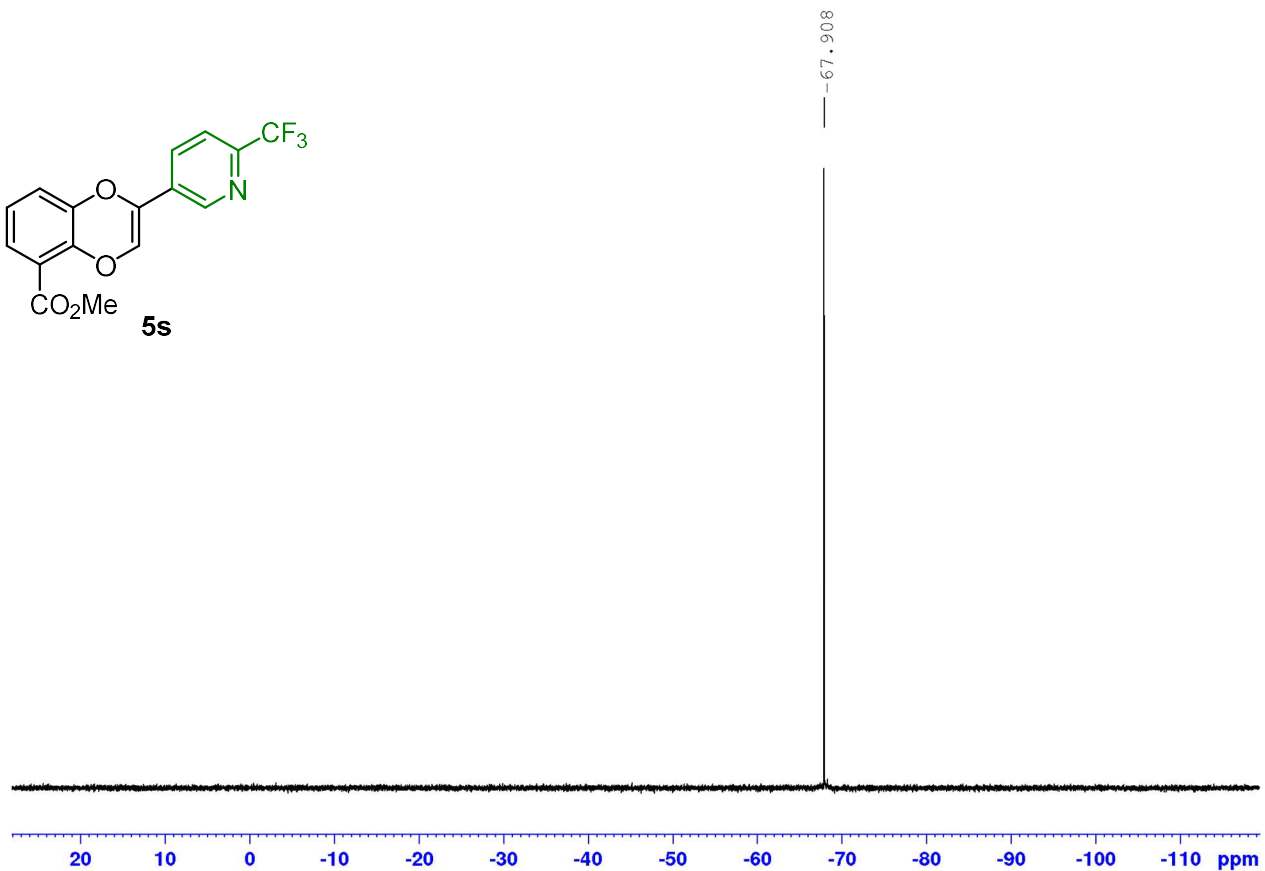



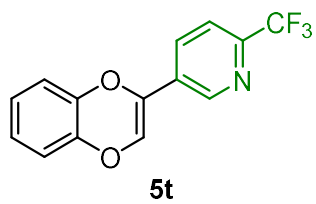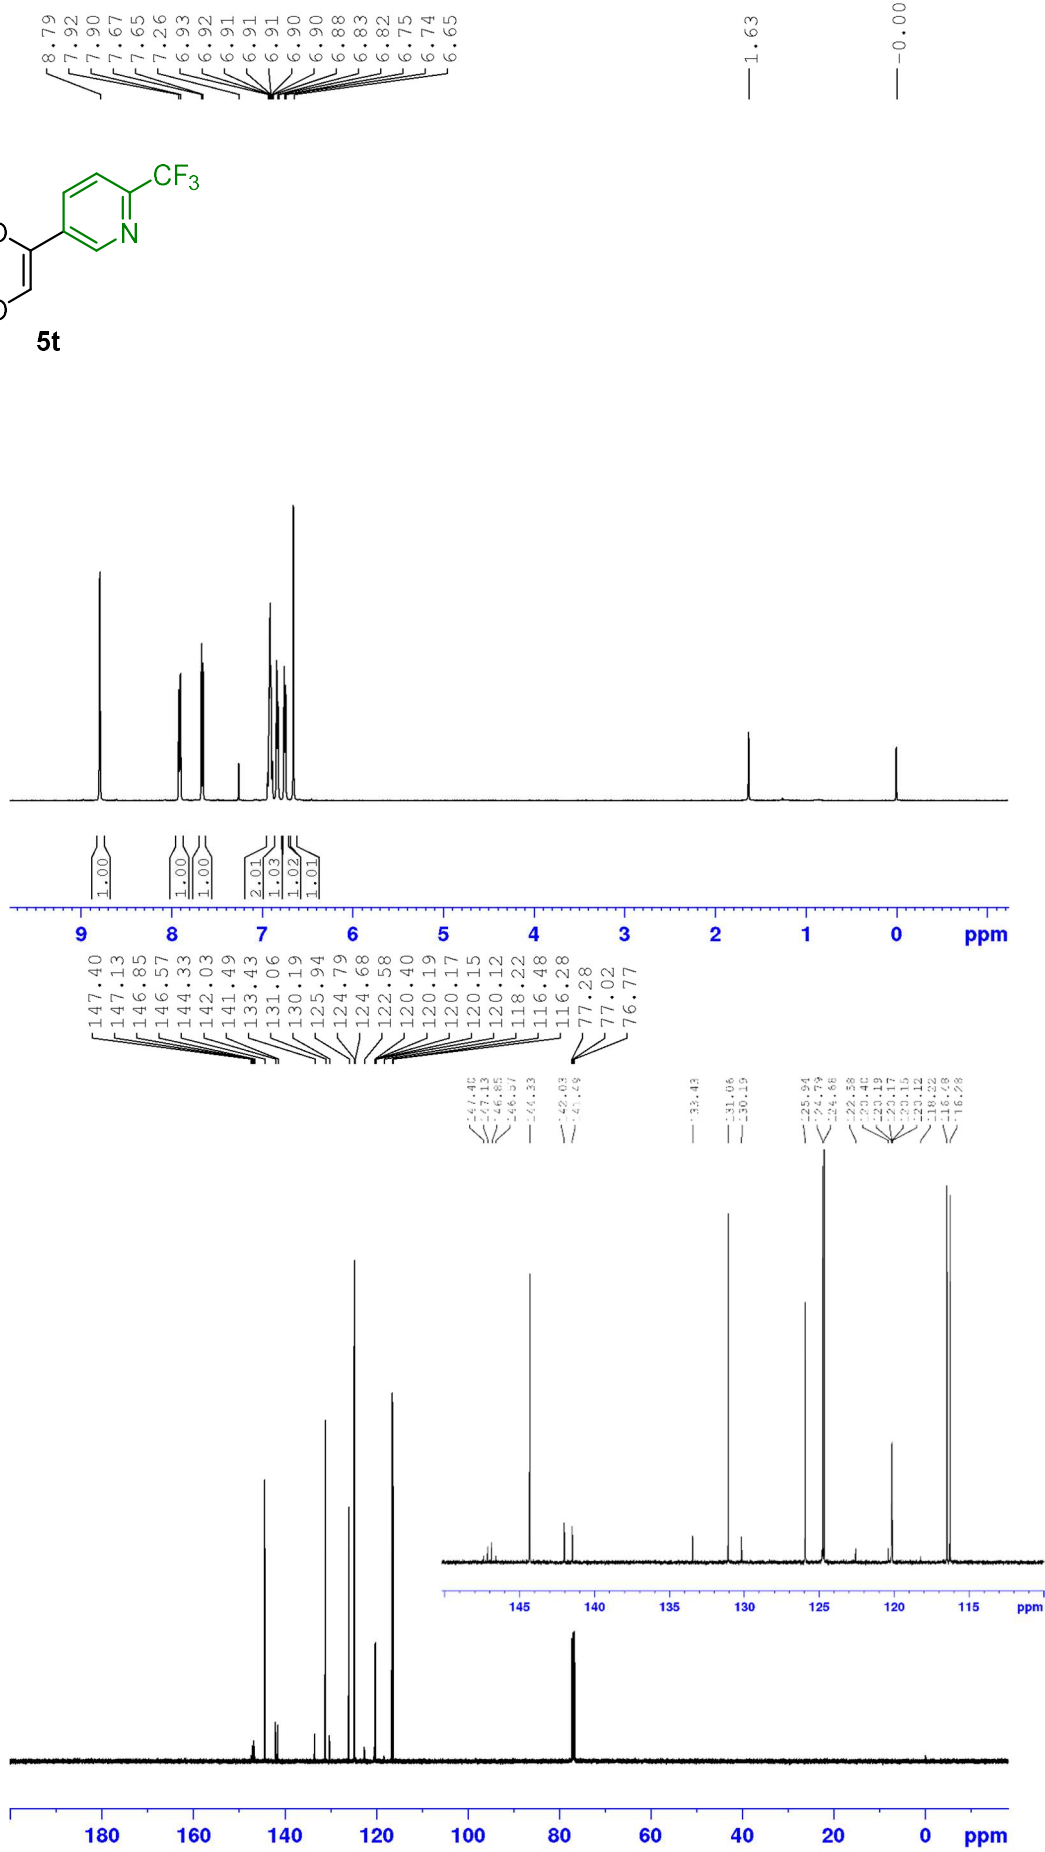

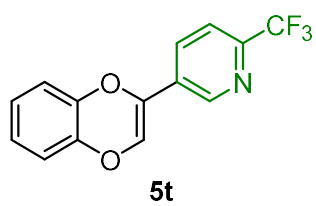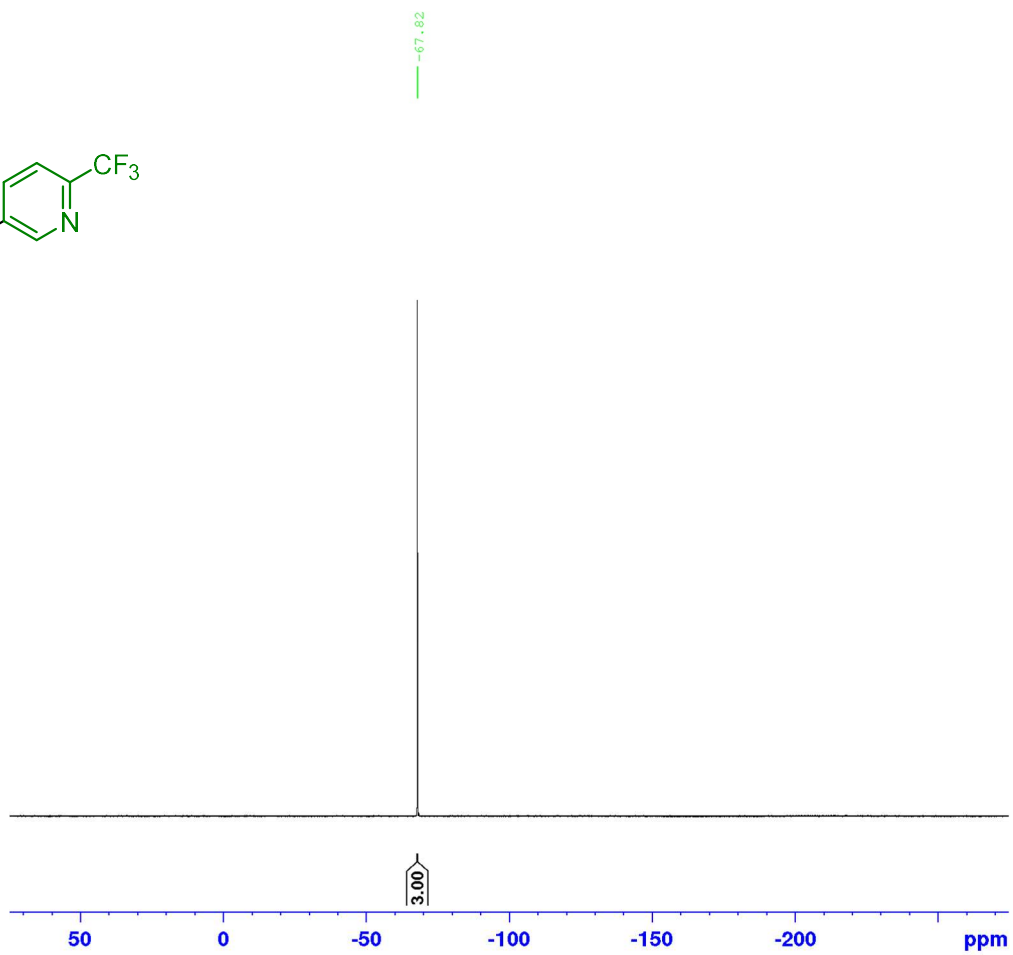

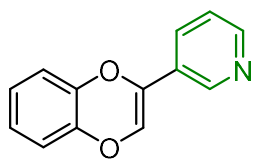

5u

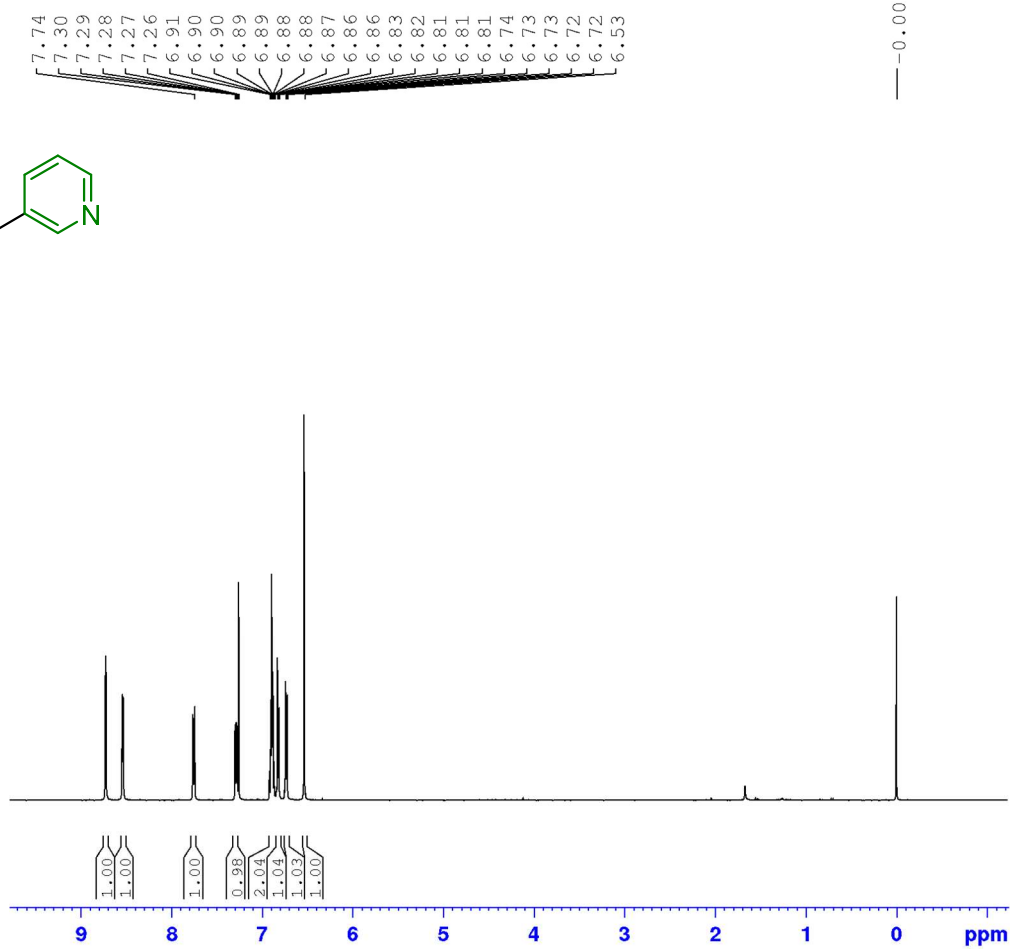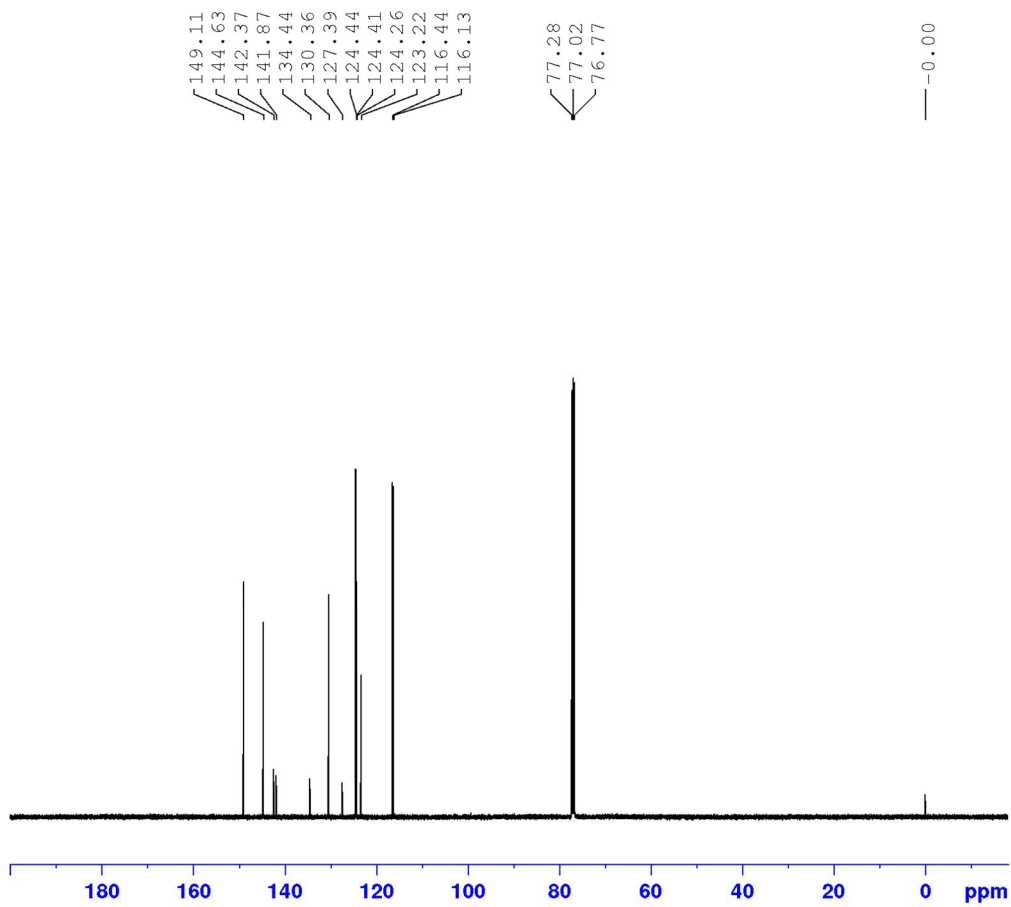

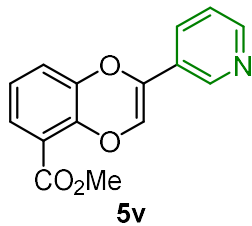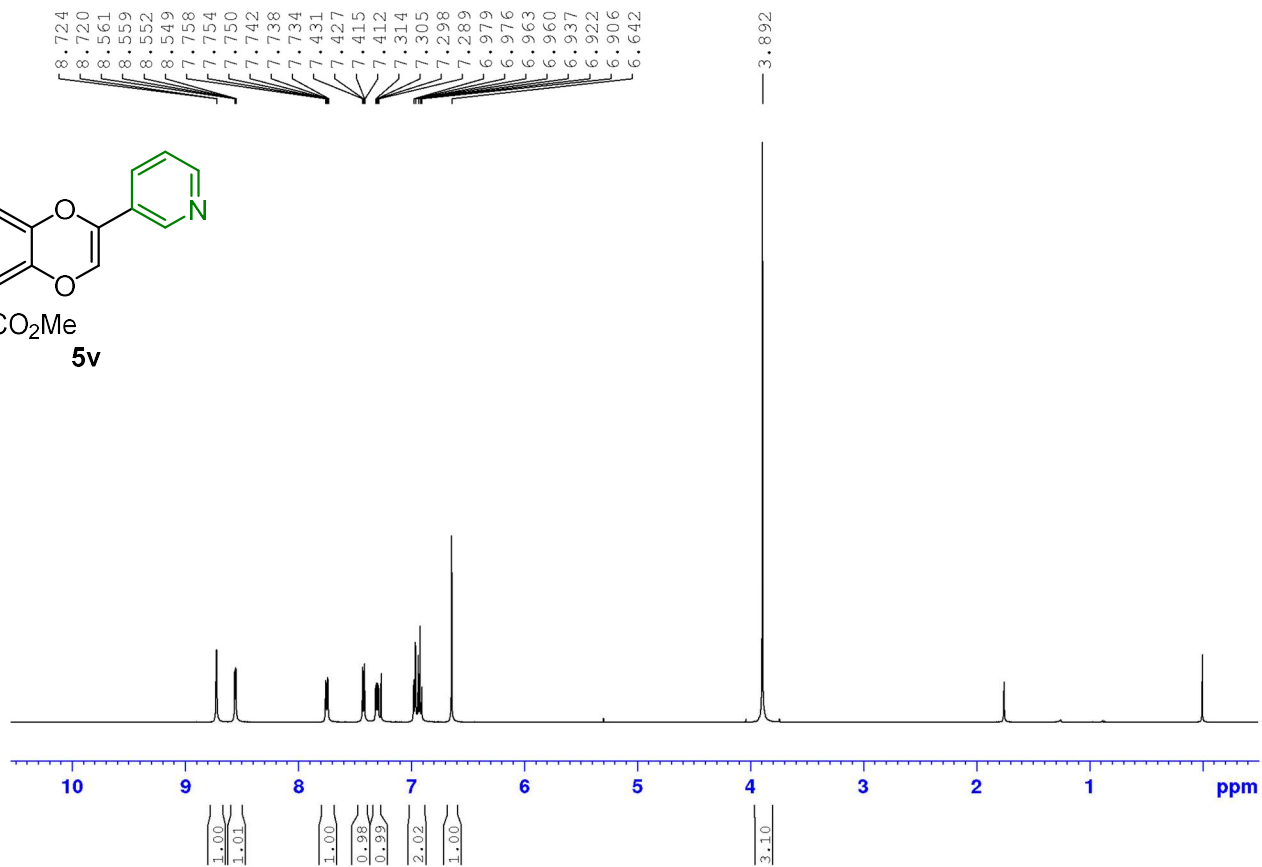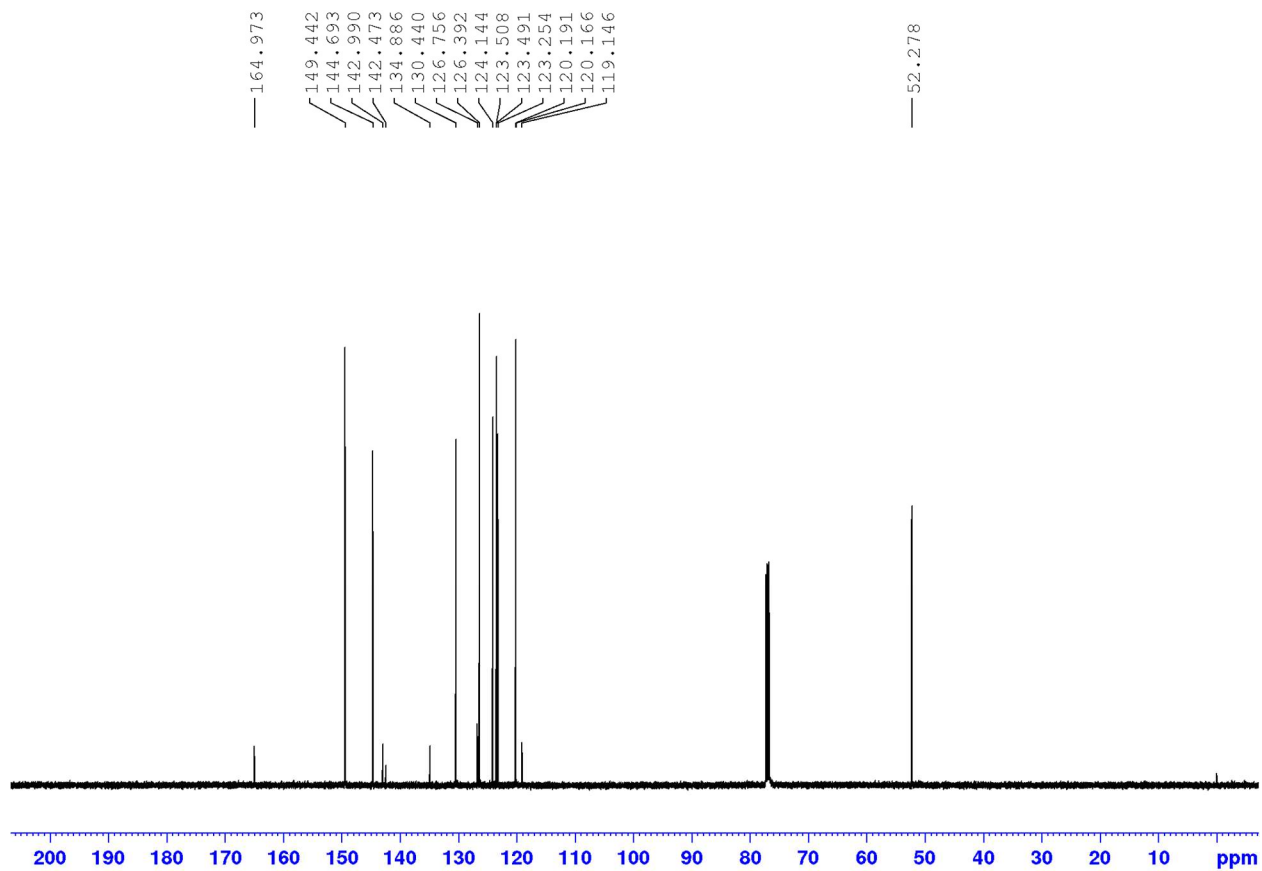

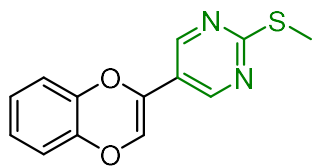

5w

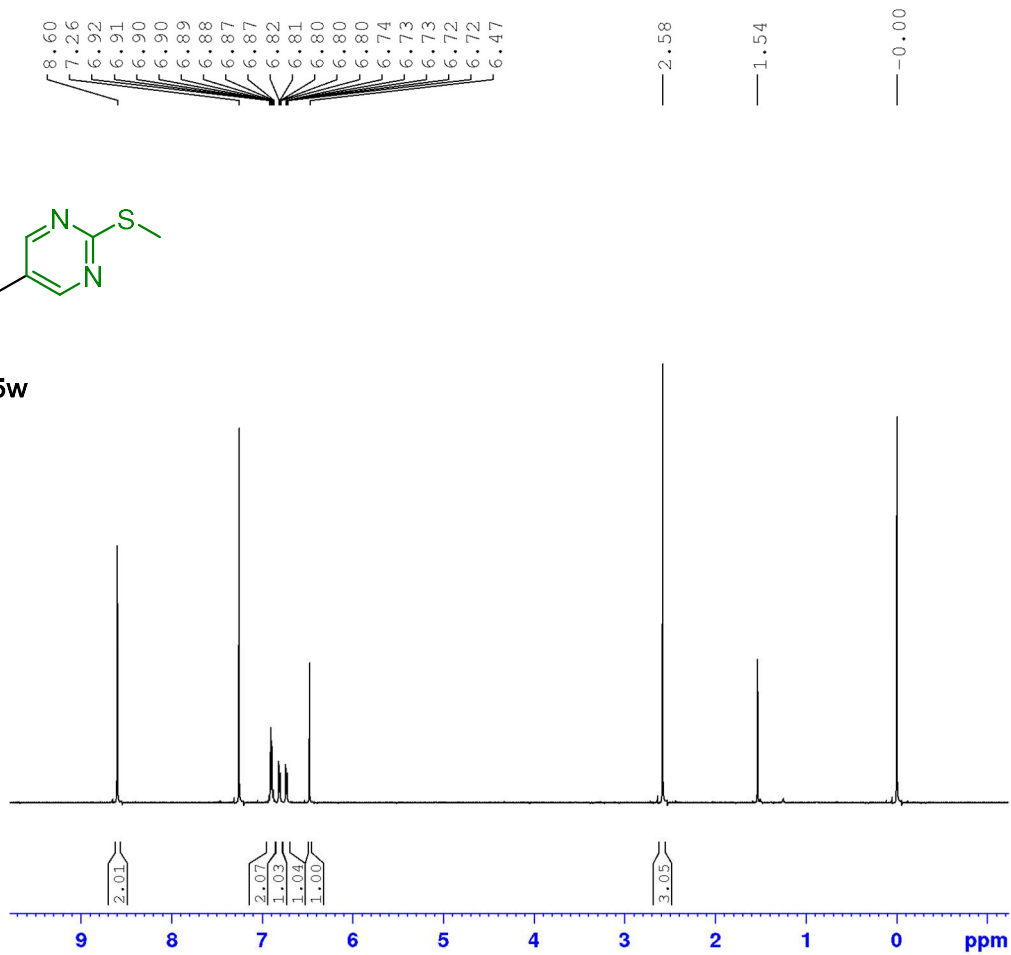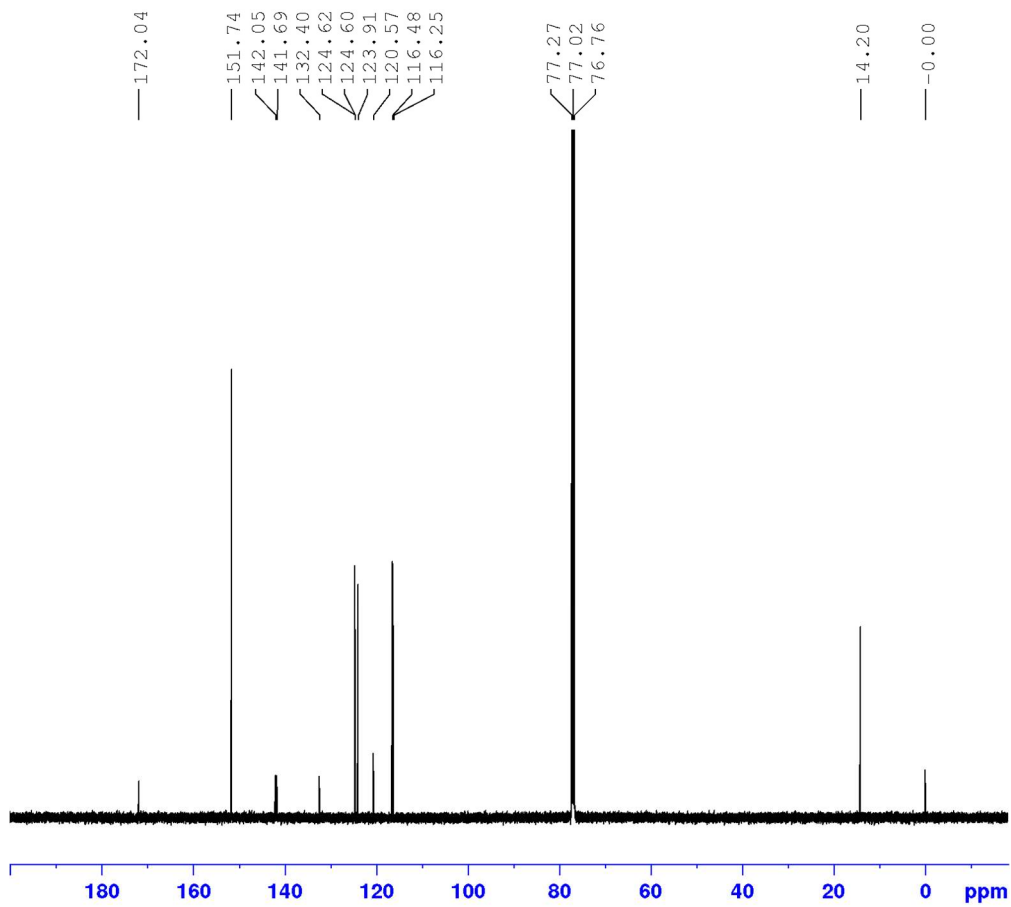

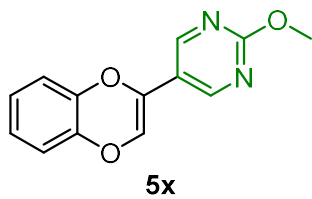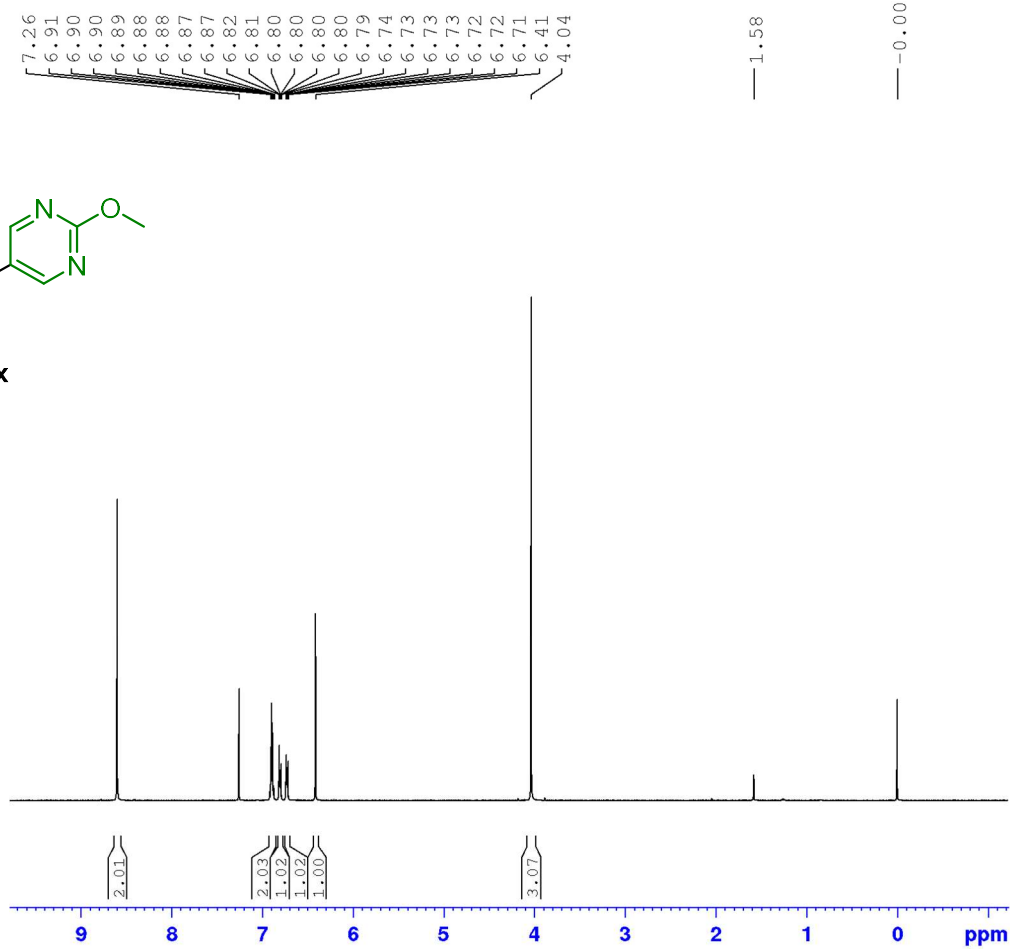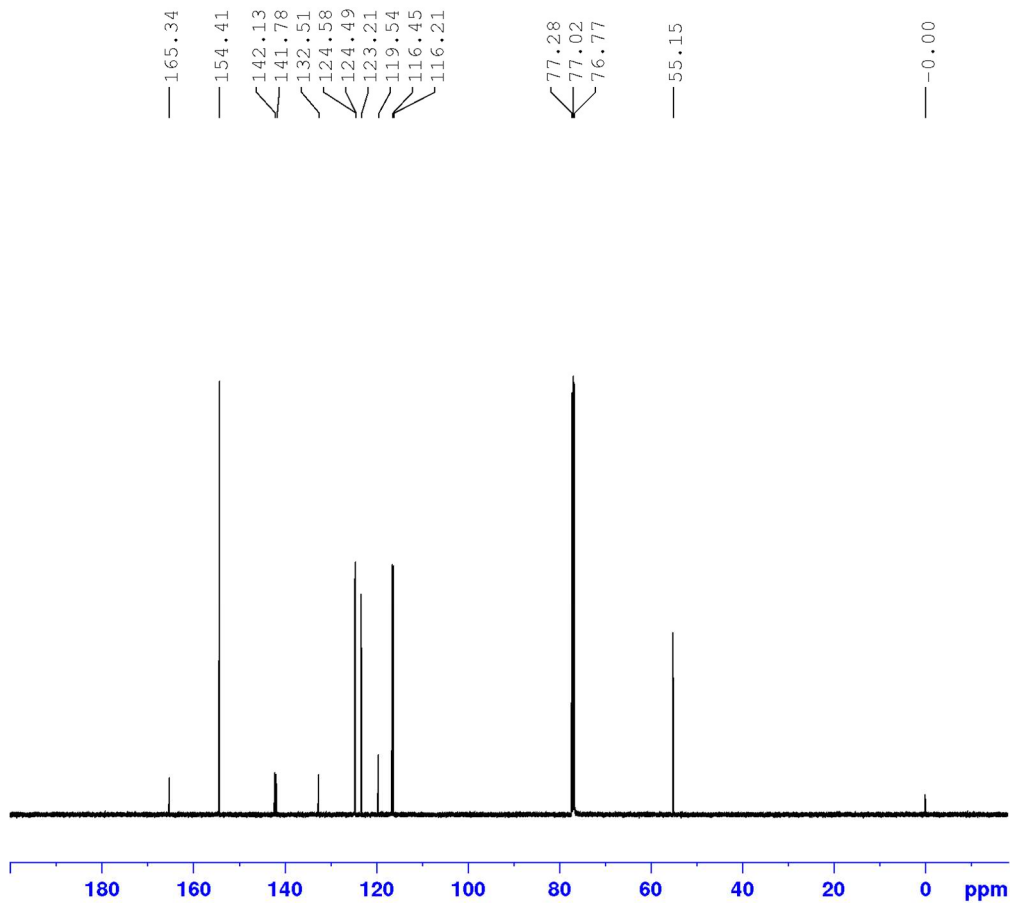

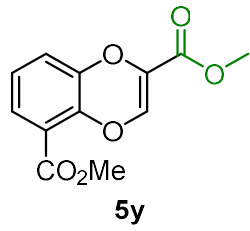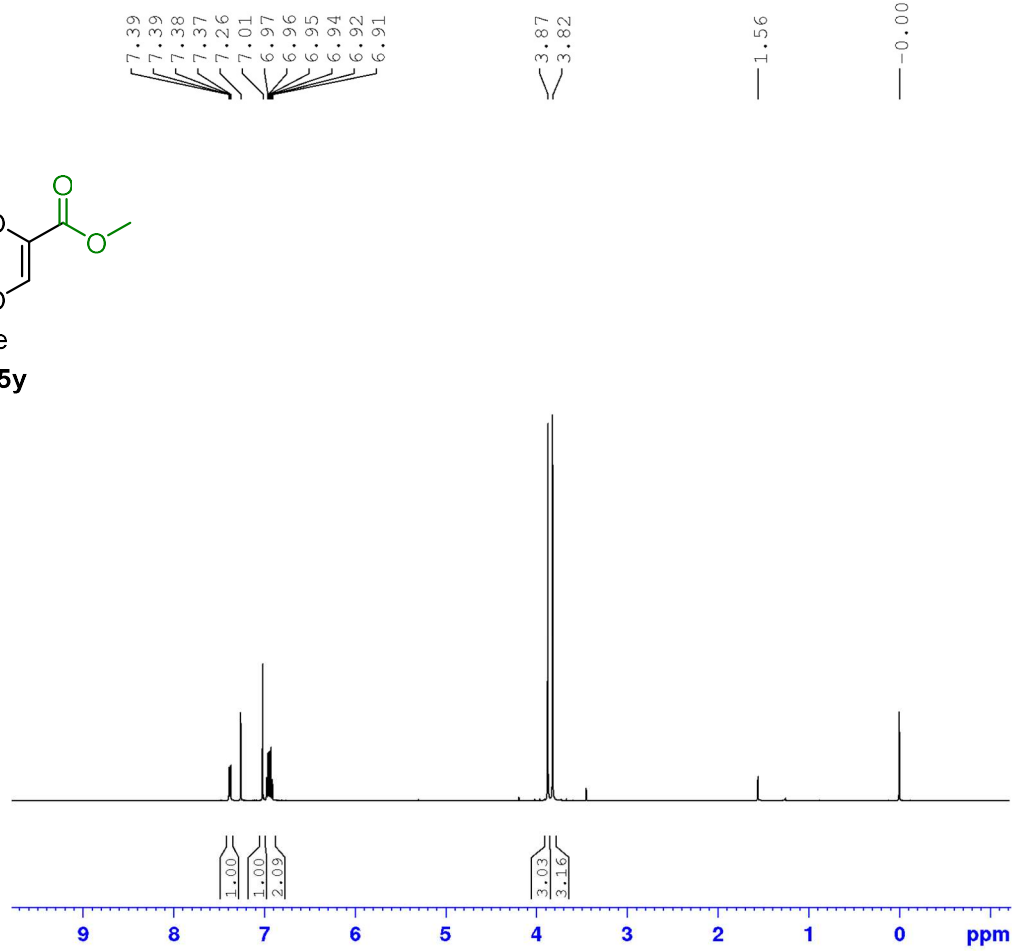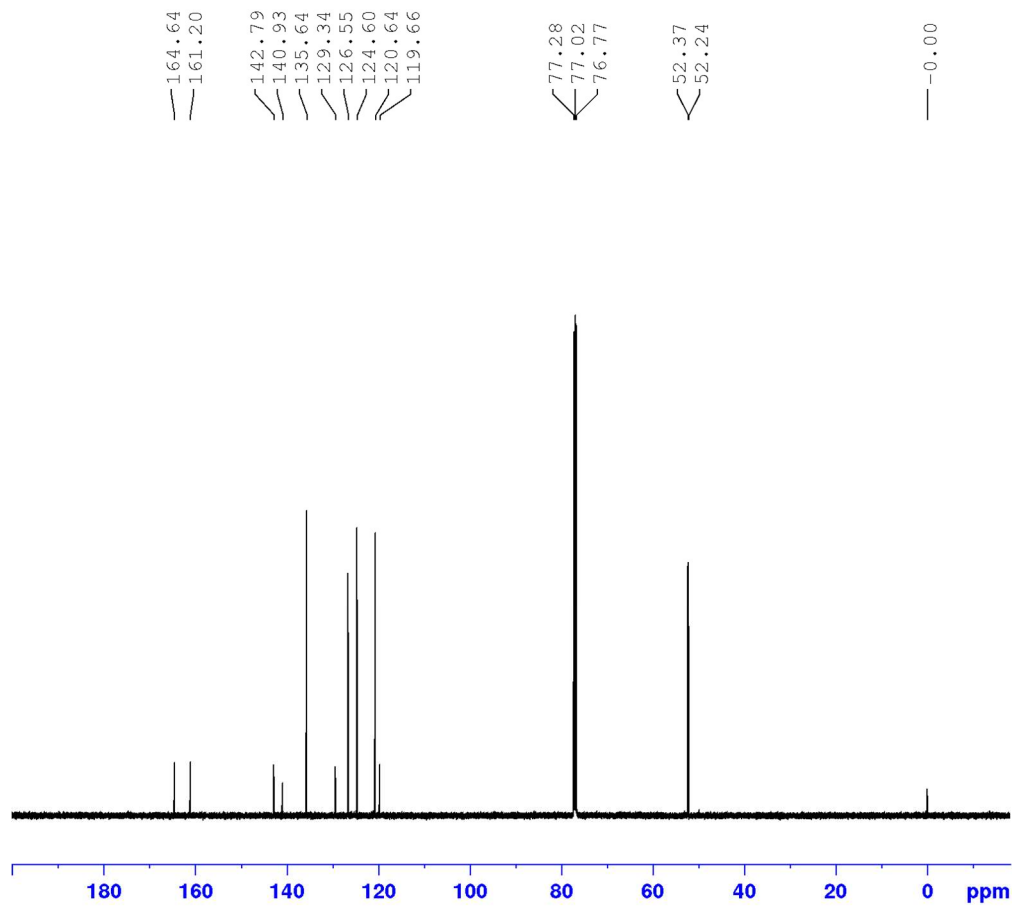

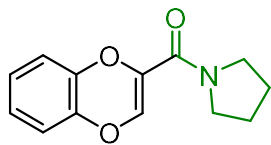

5aa

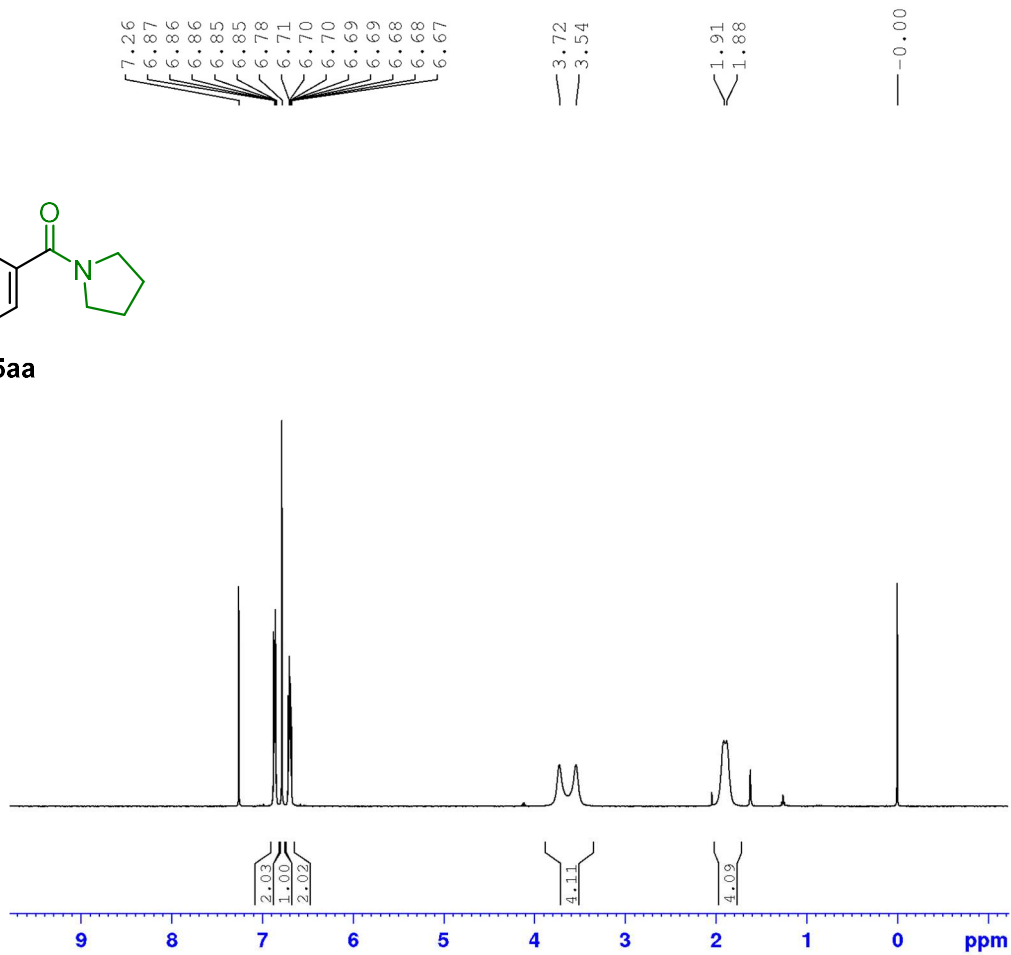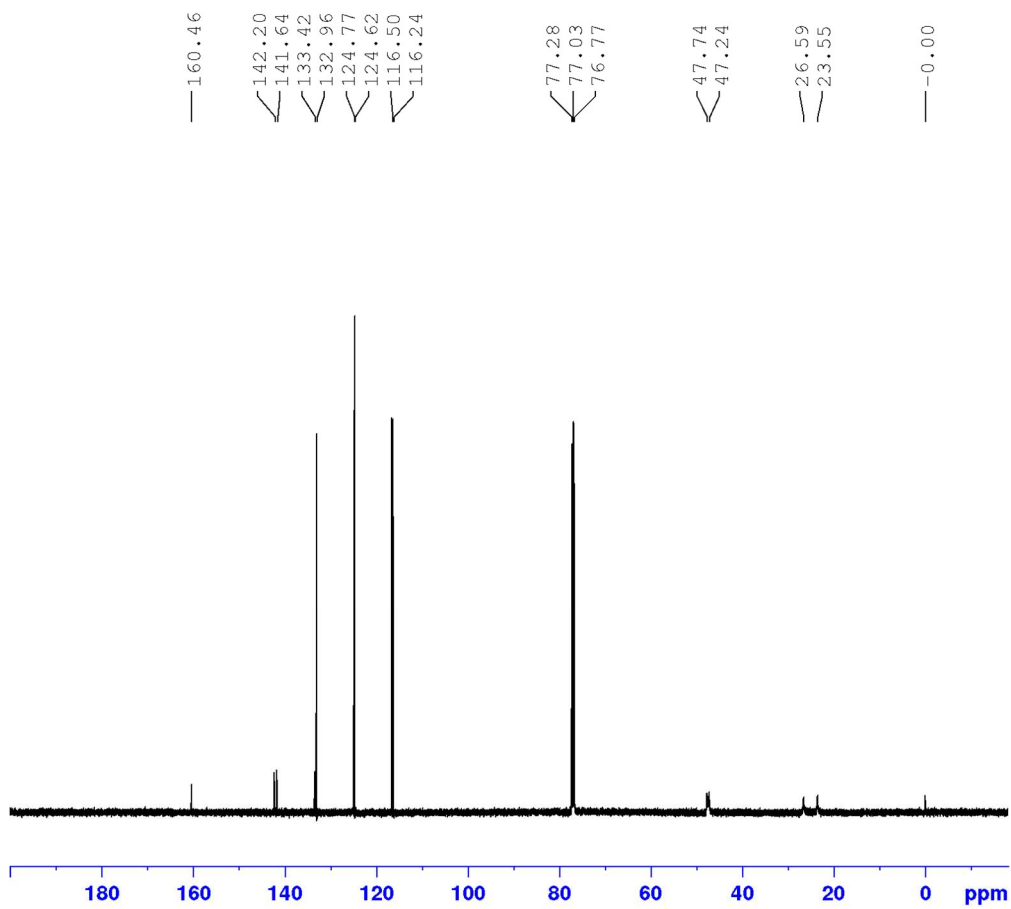



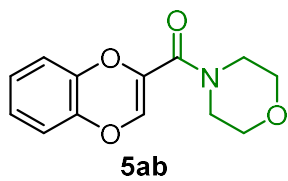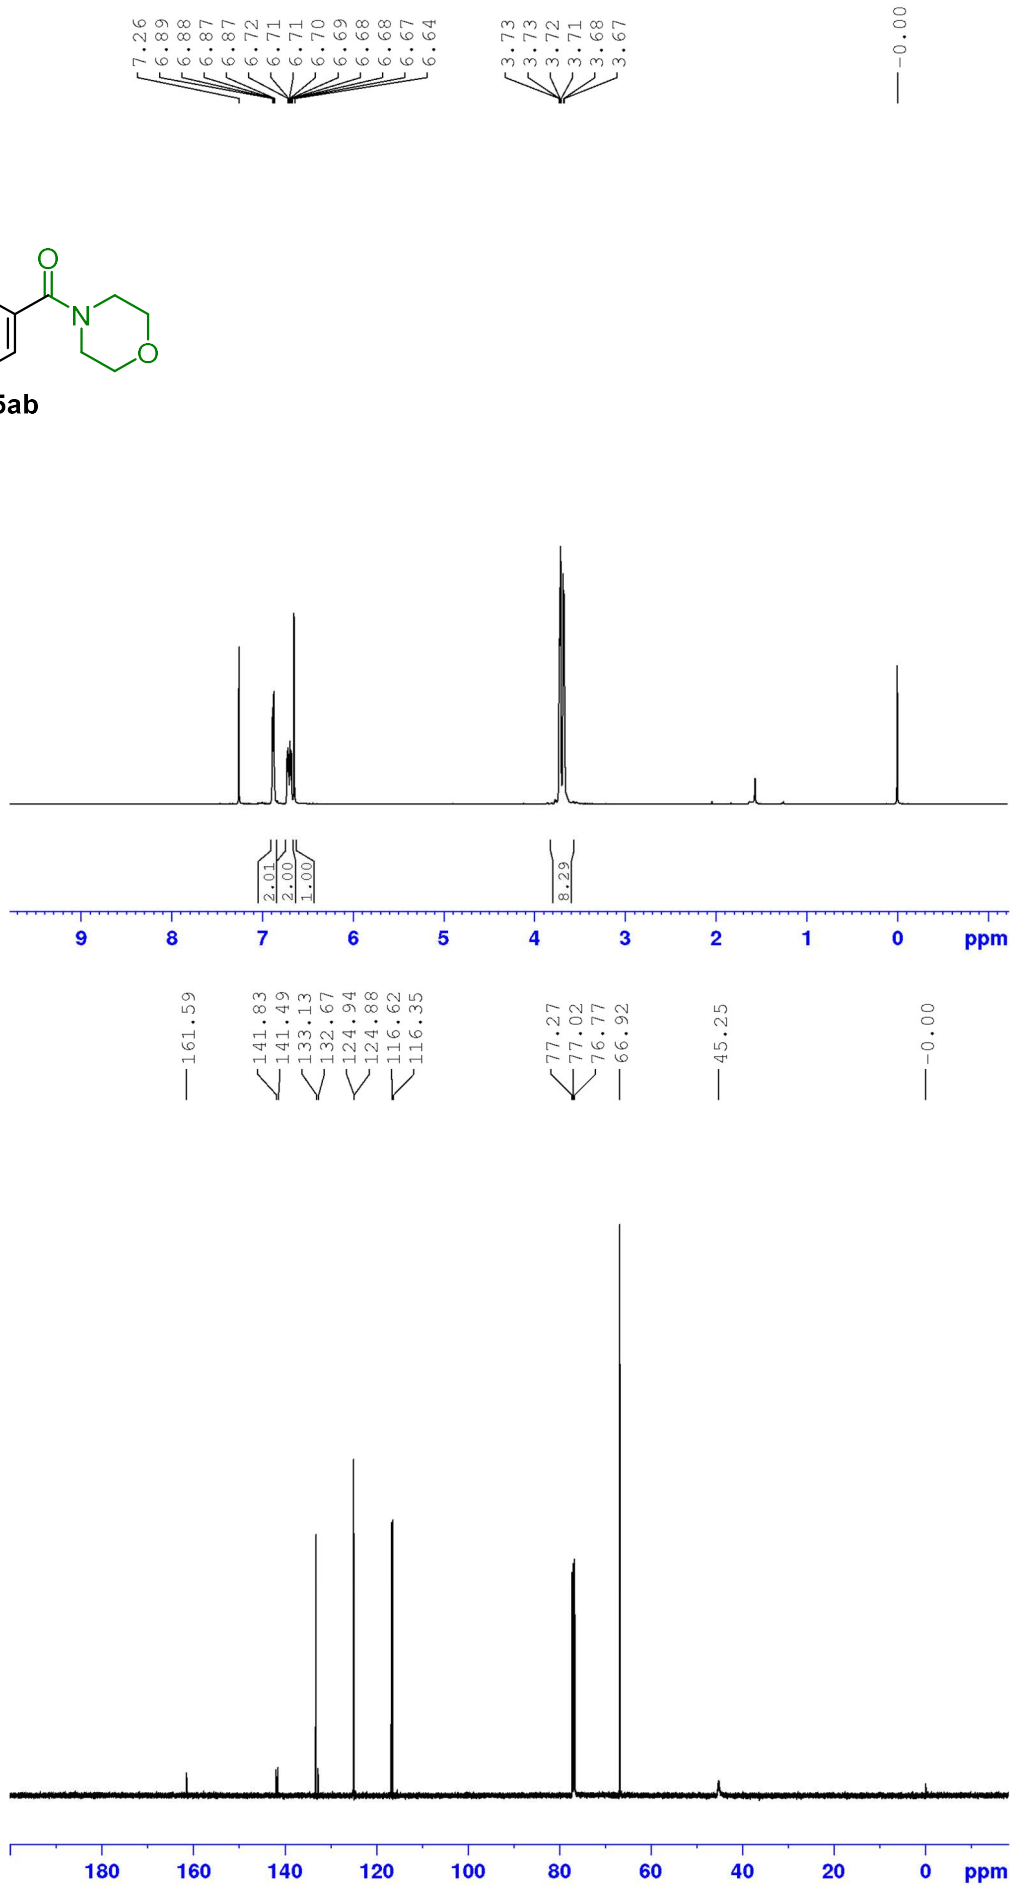

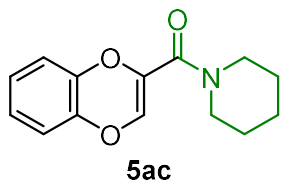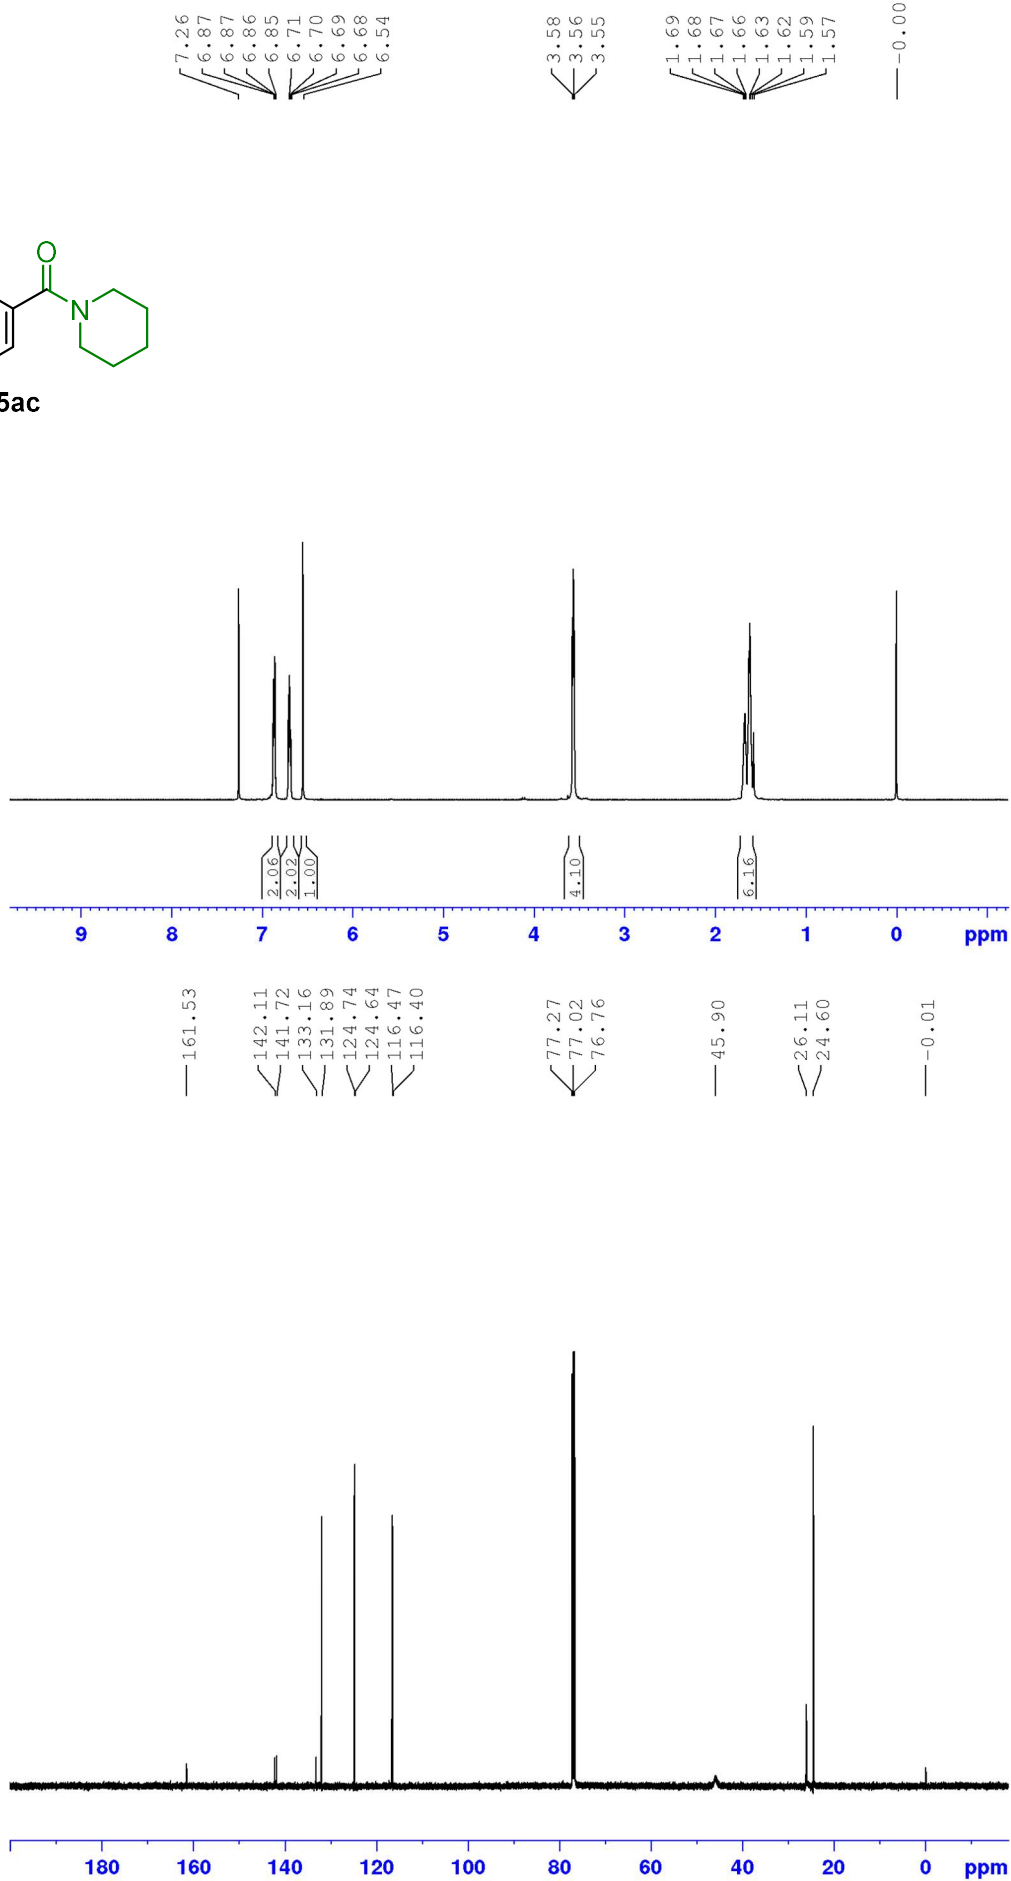

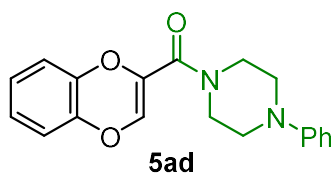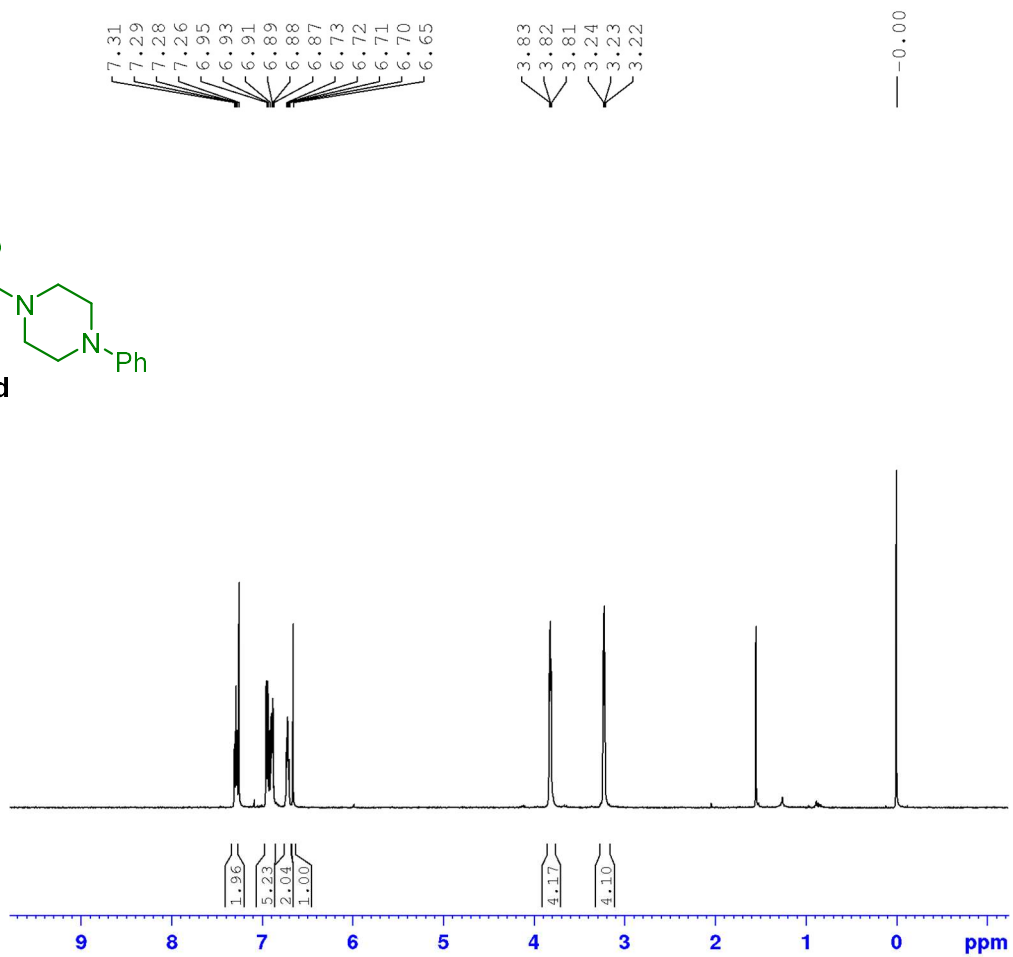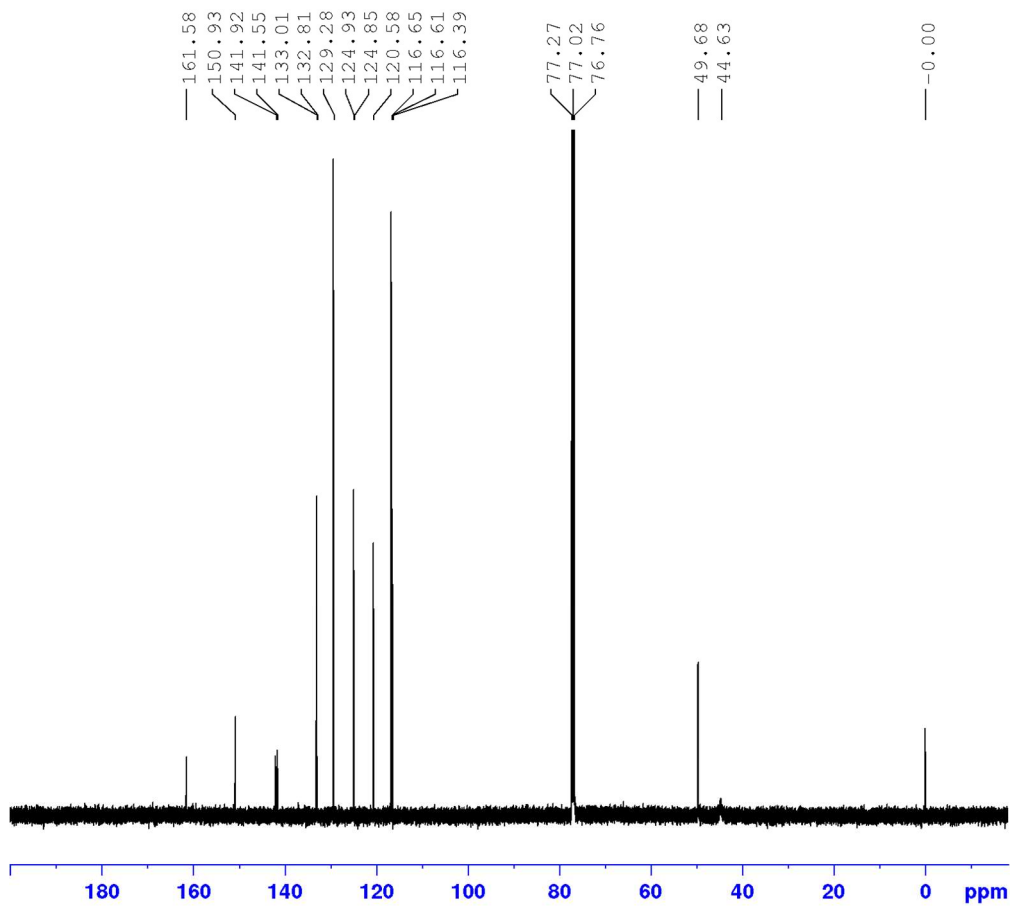

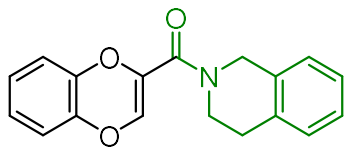

5ae

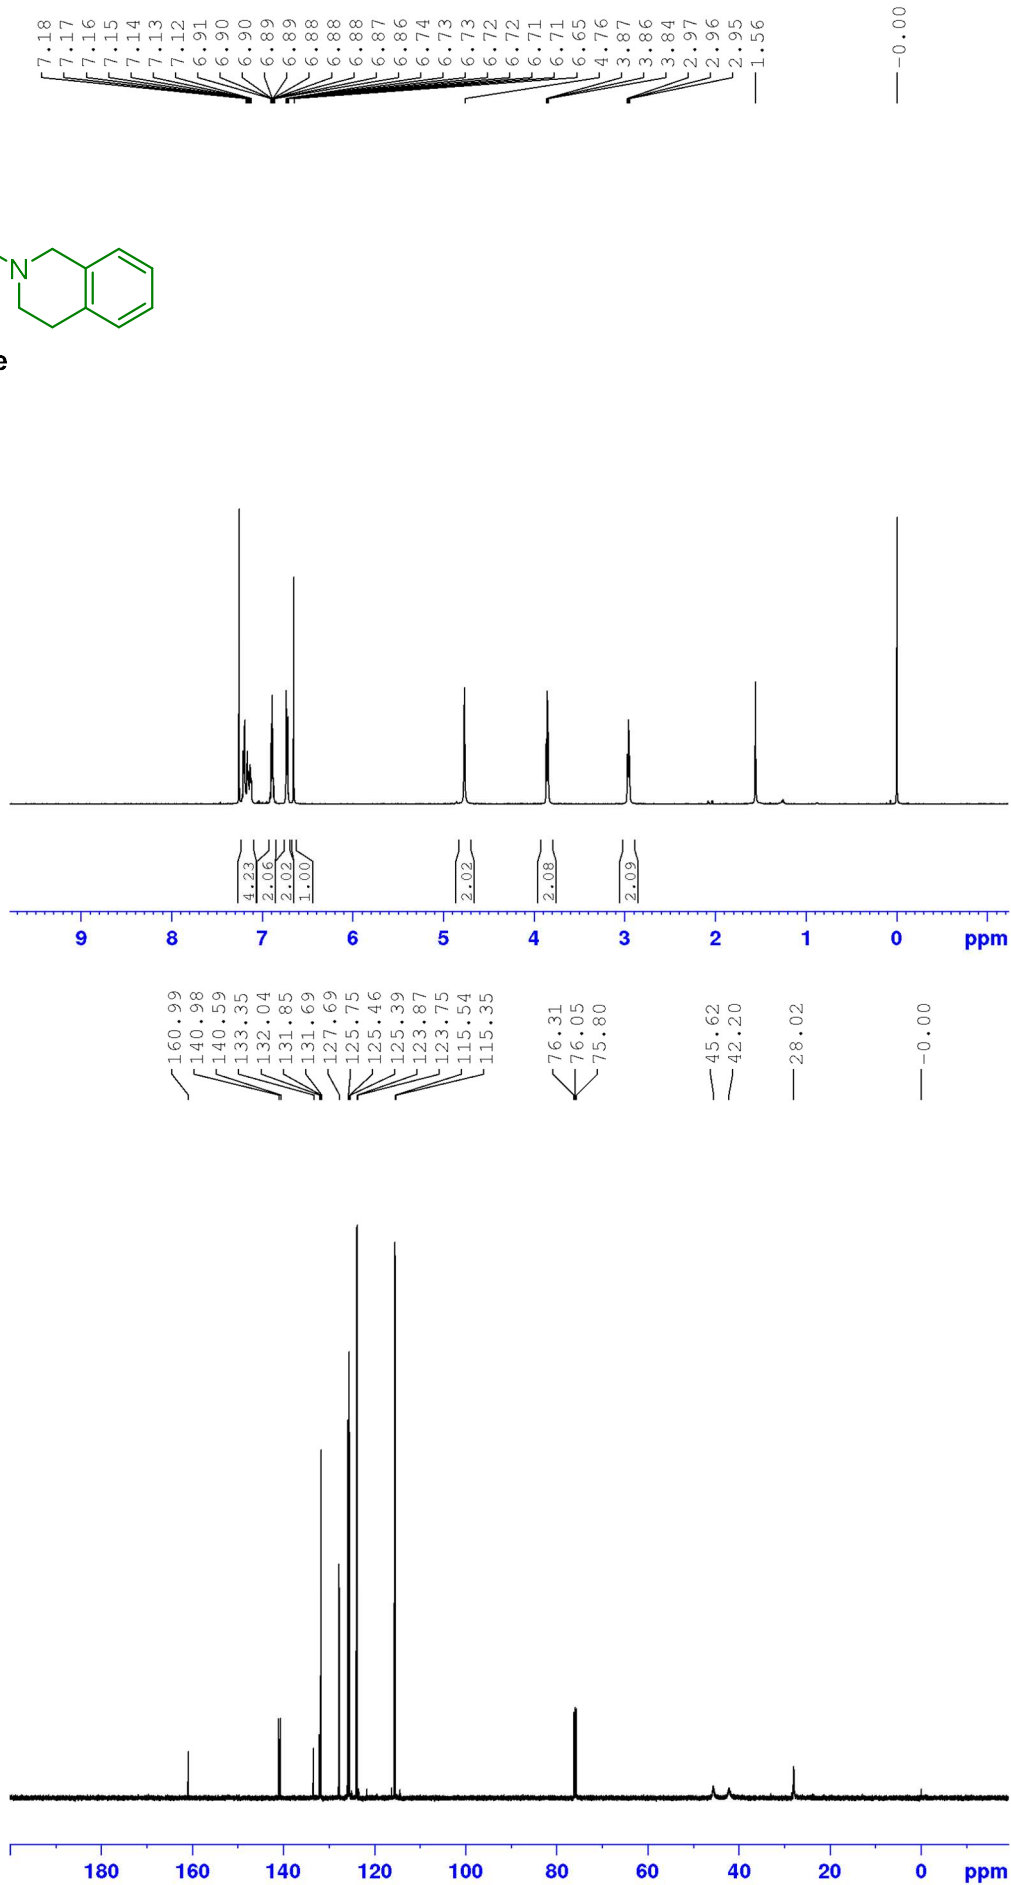

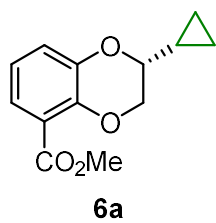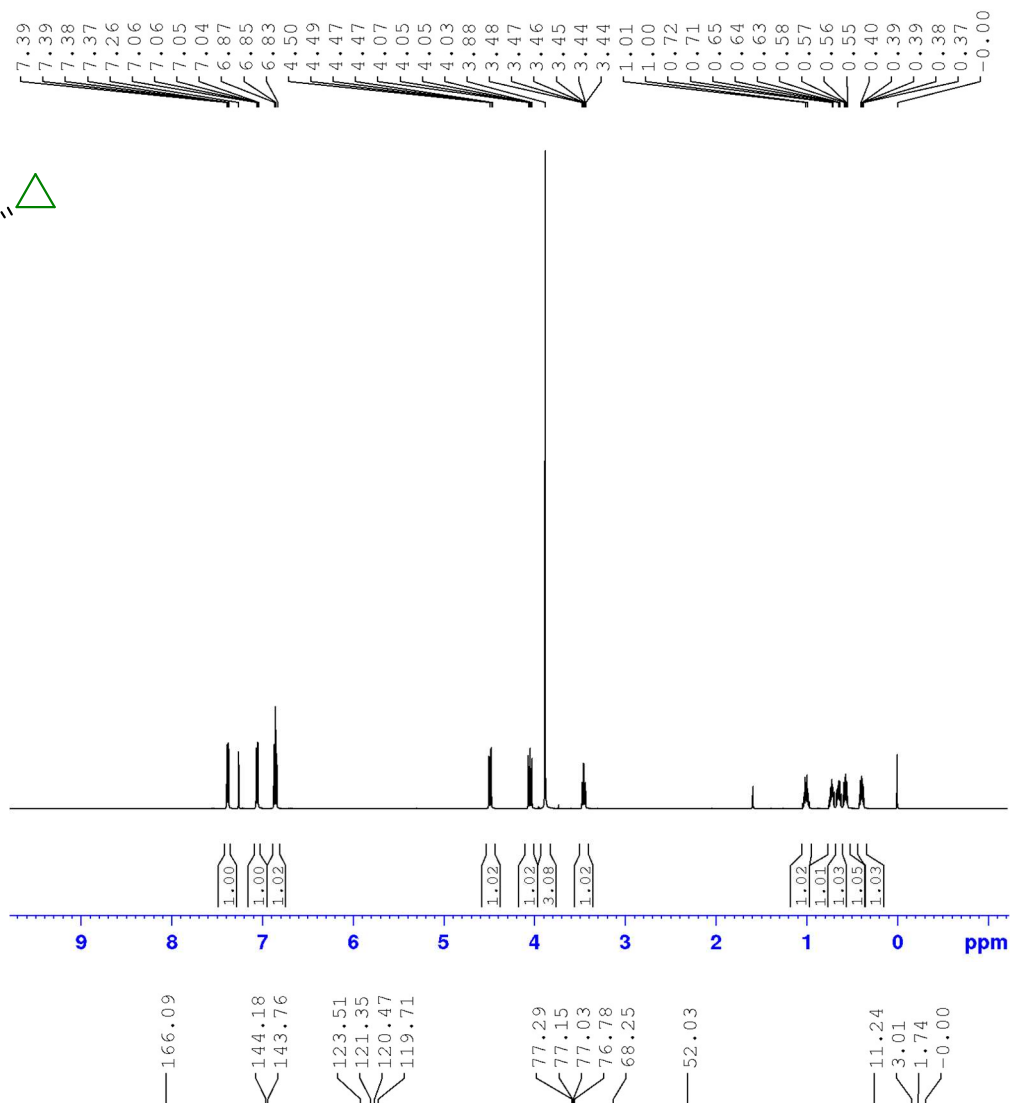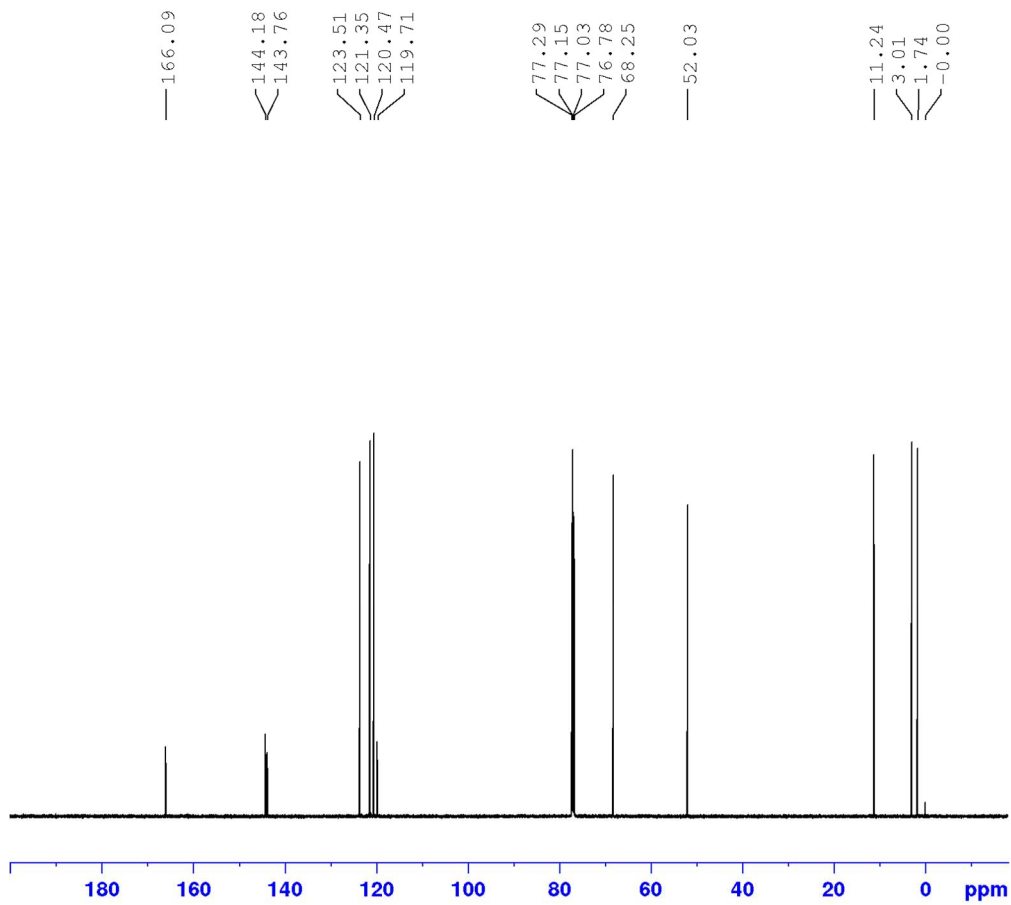

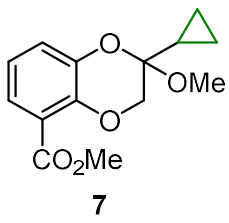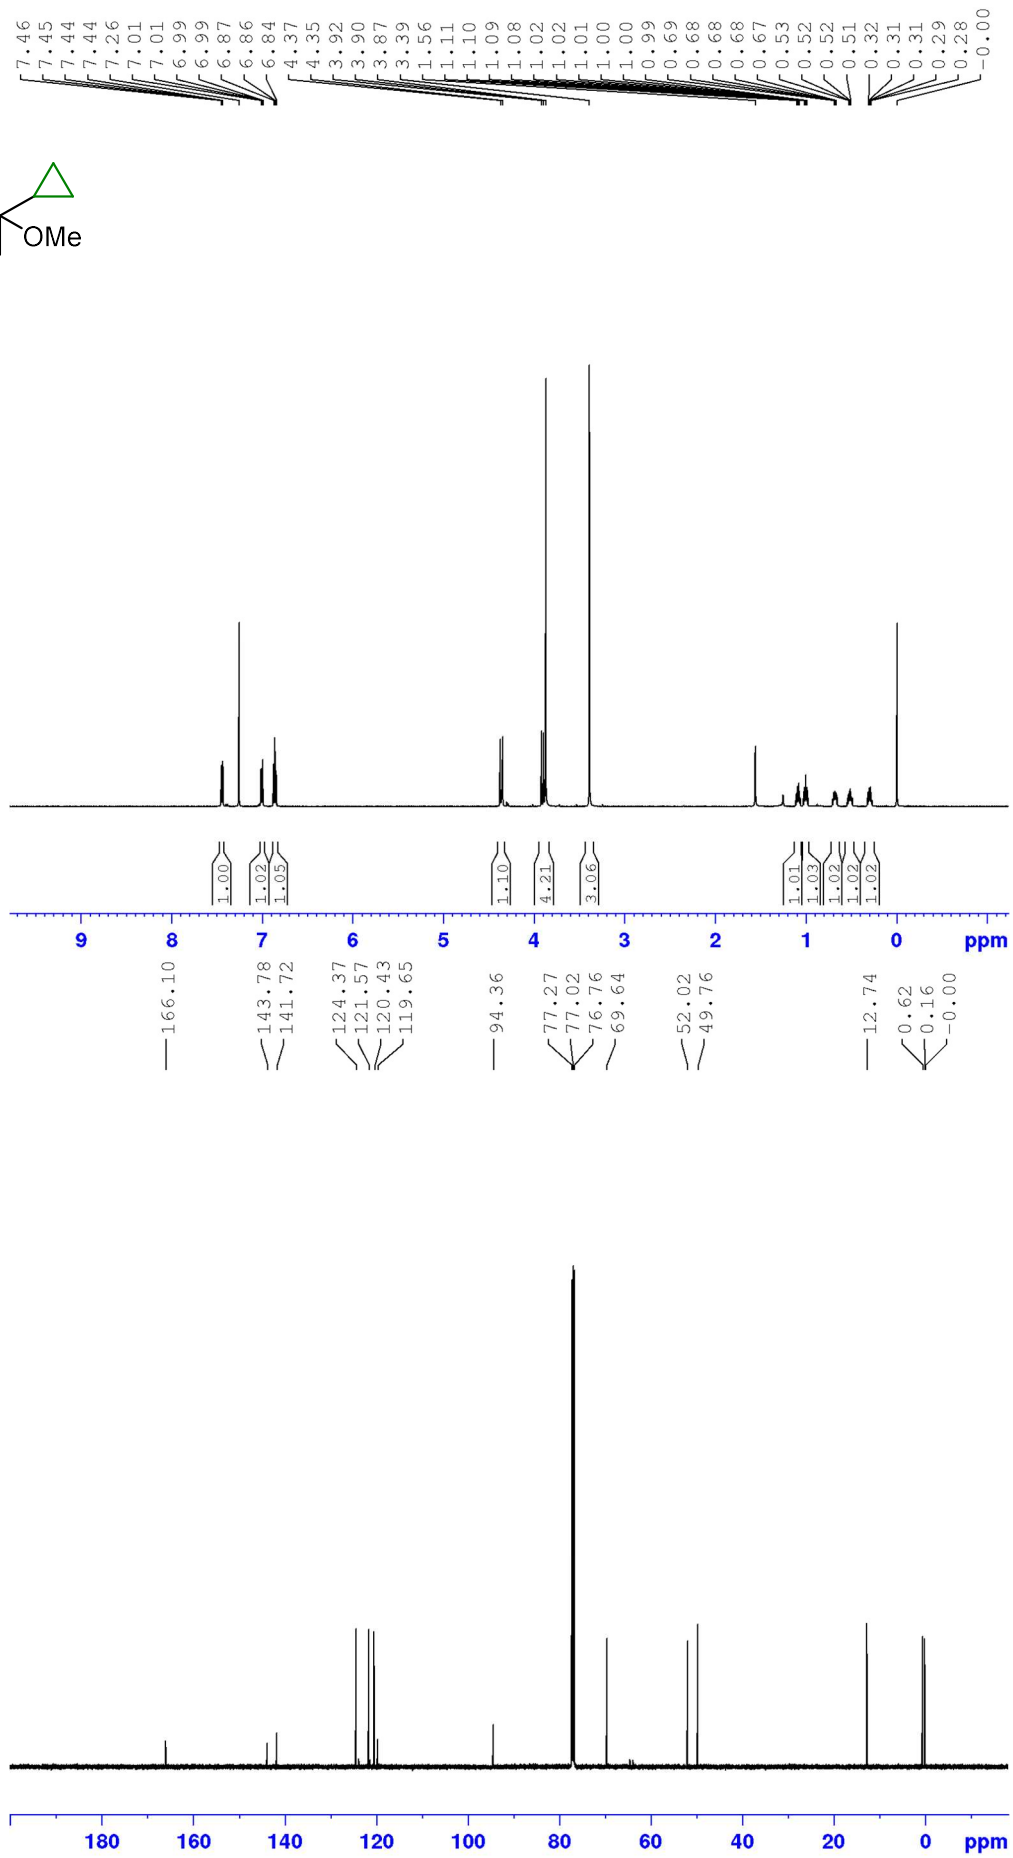

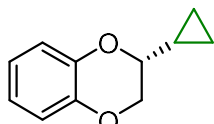

6b

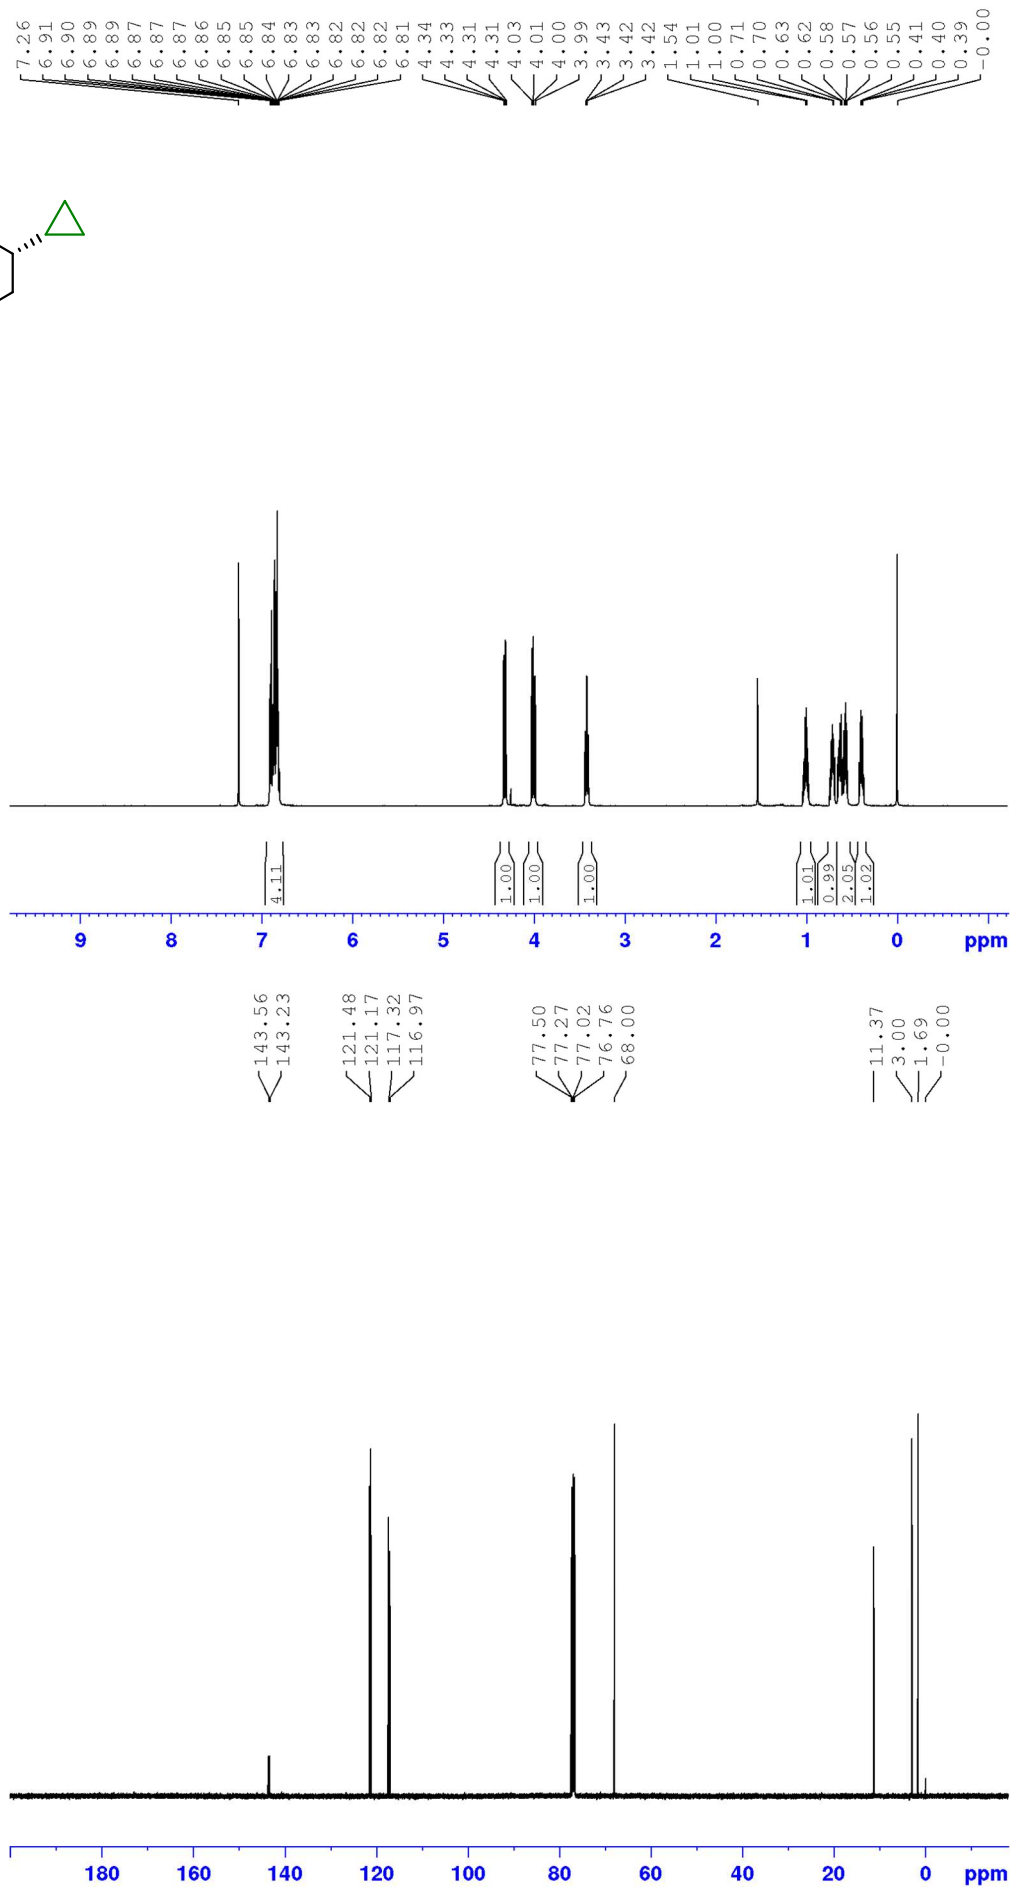

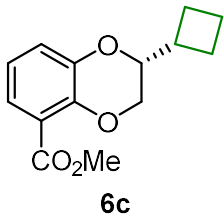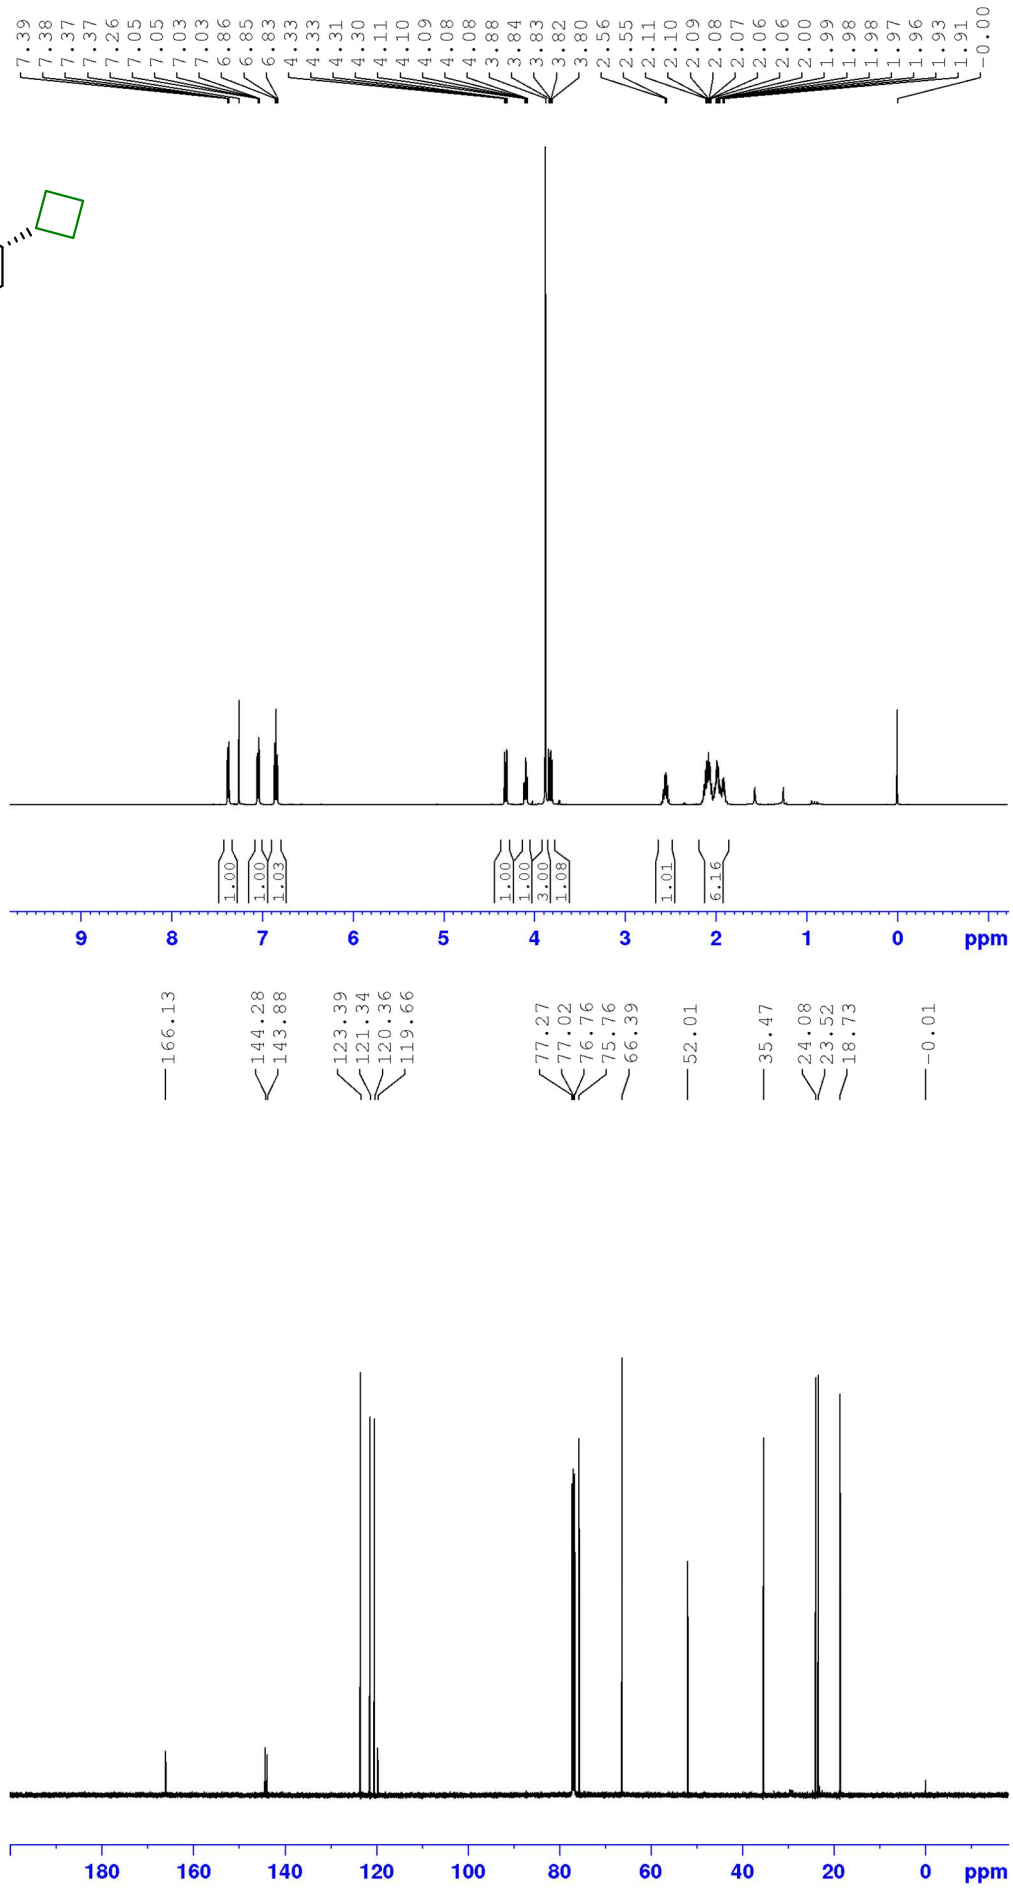



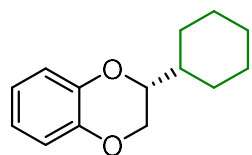

6d

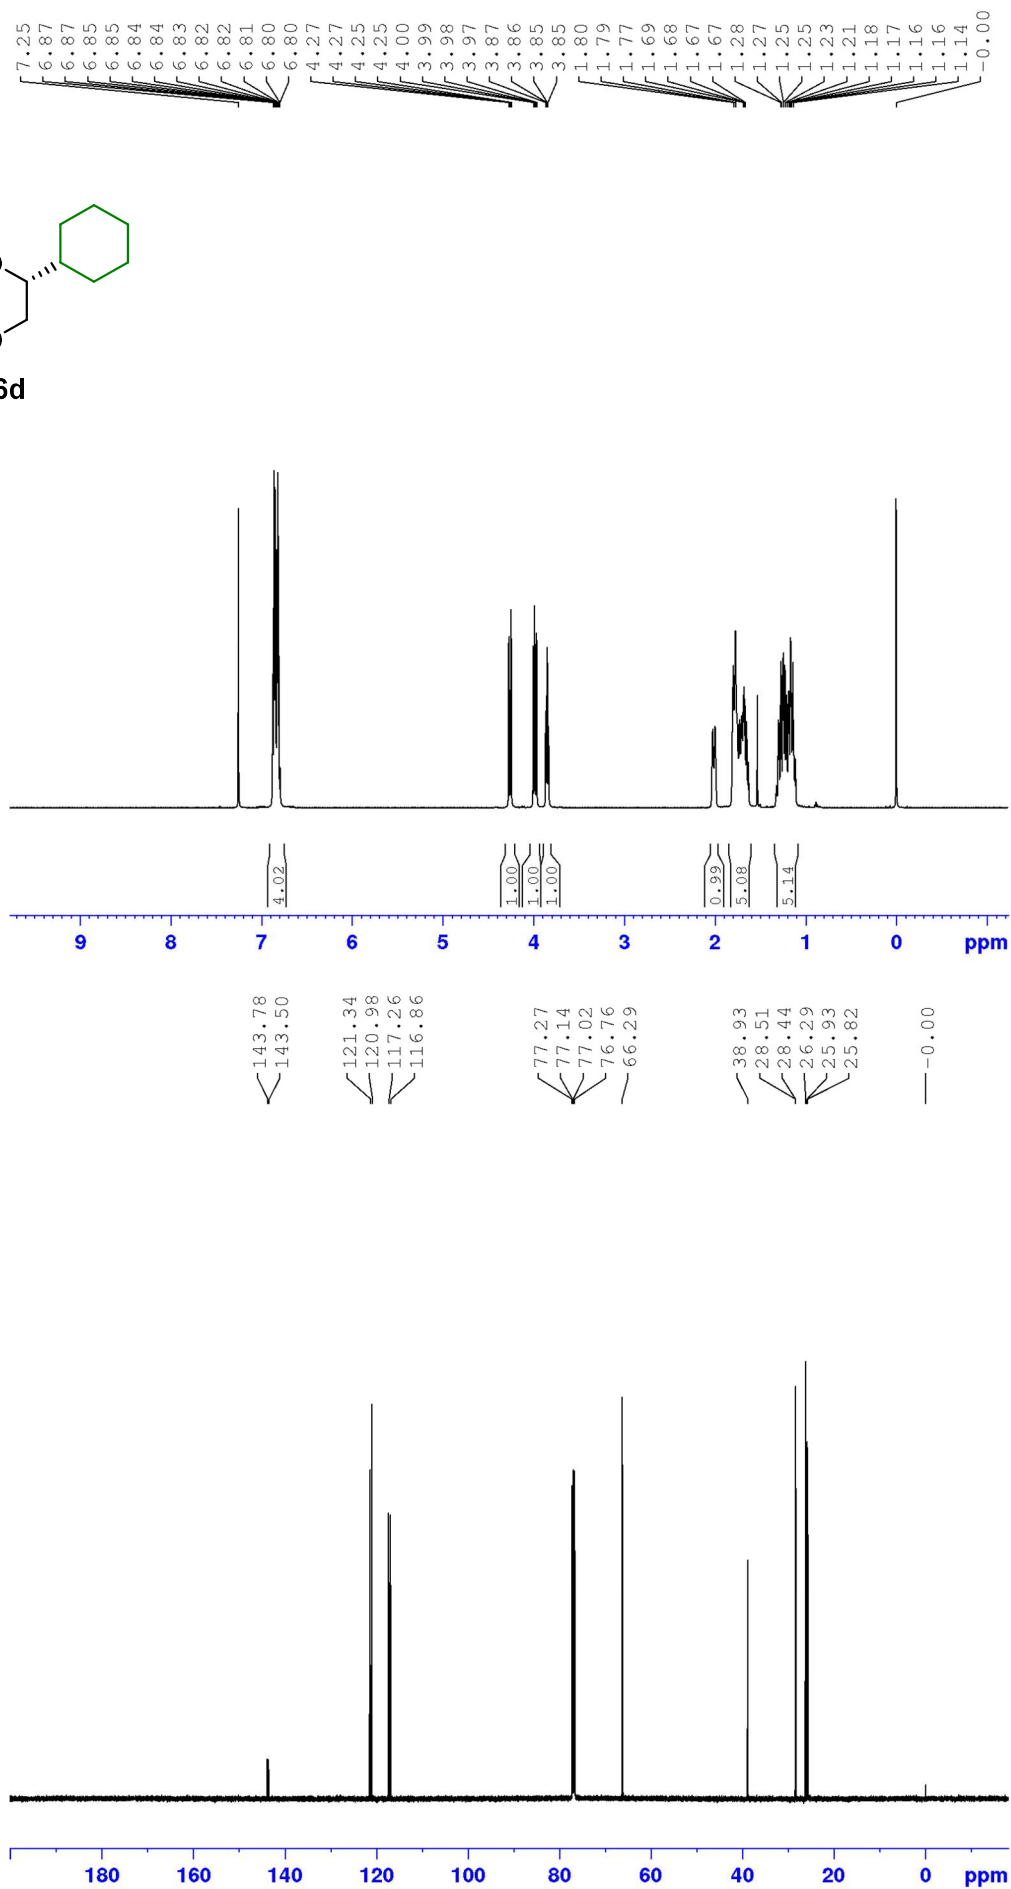

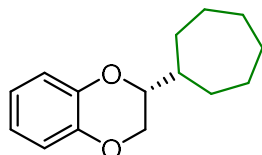

6e

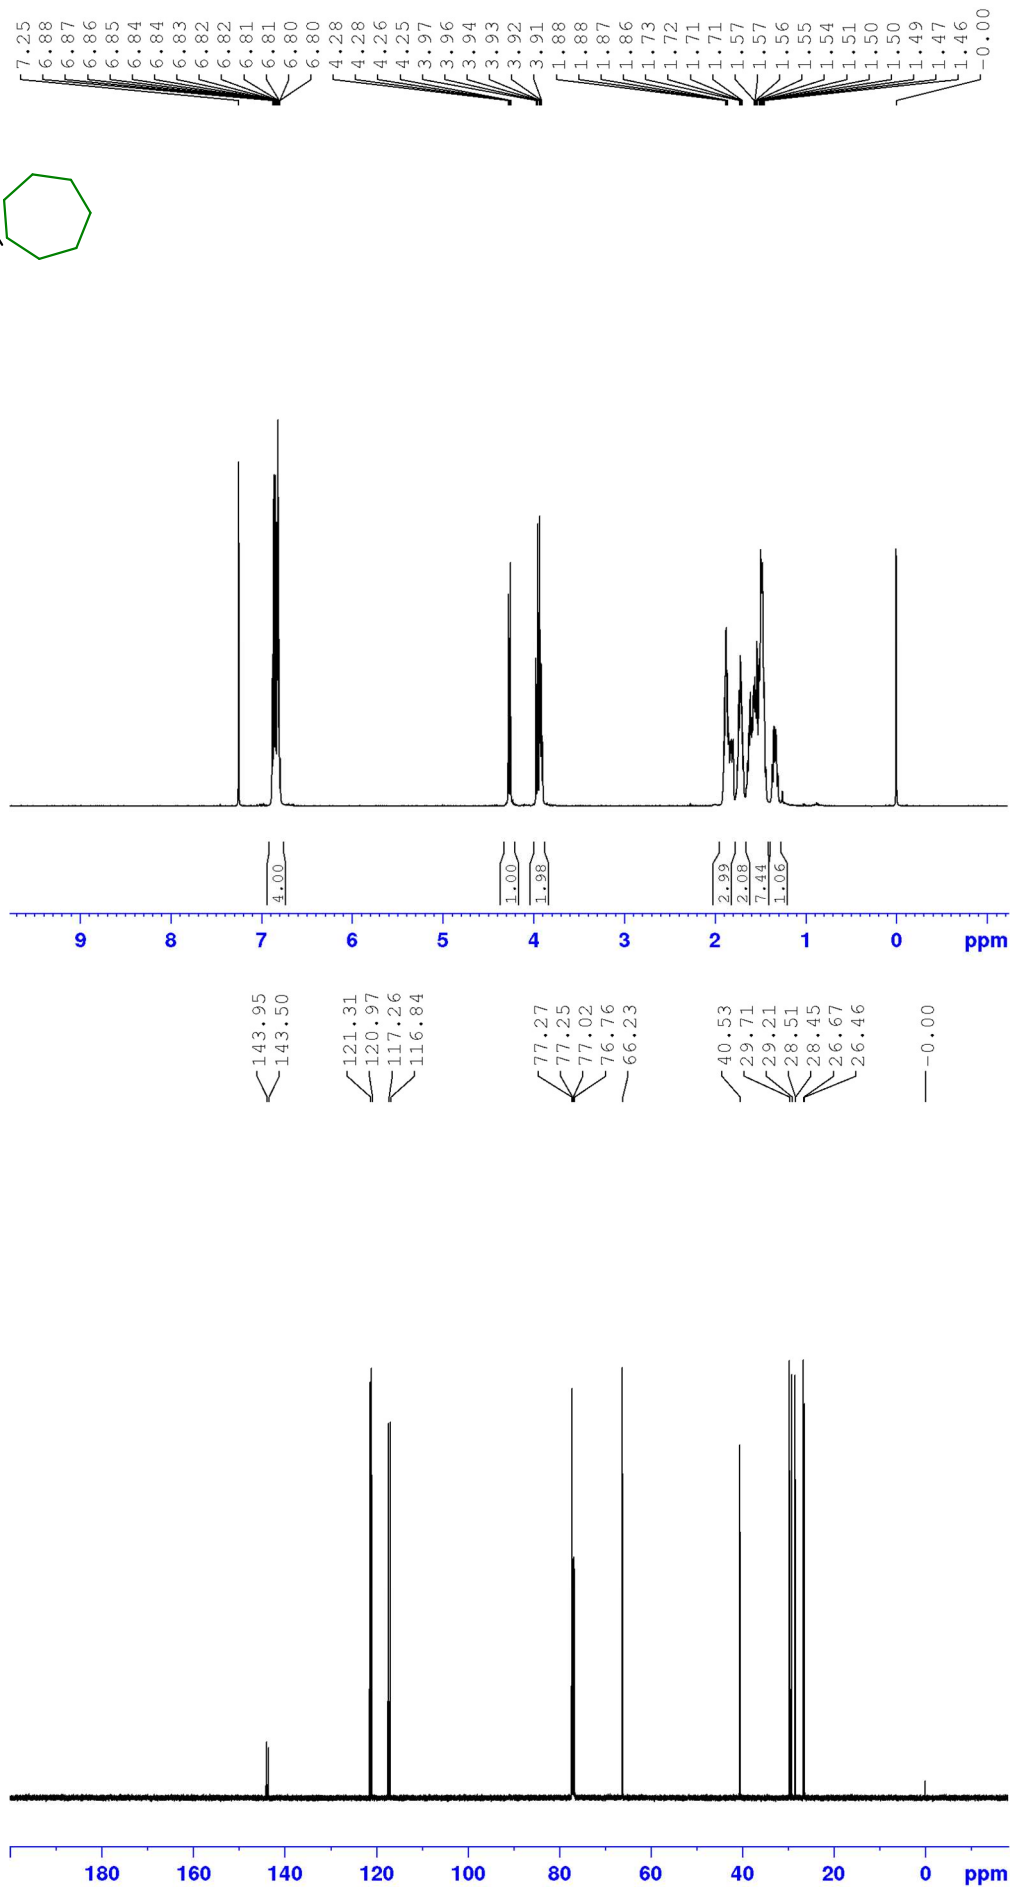

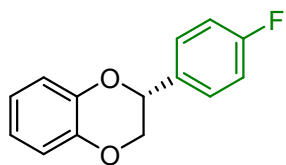

6f

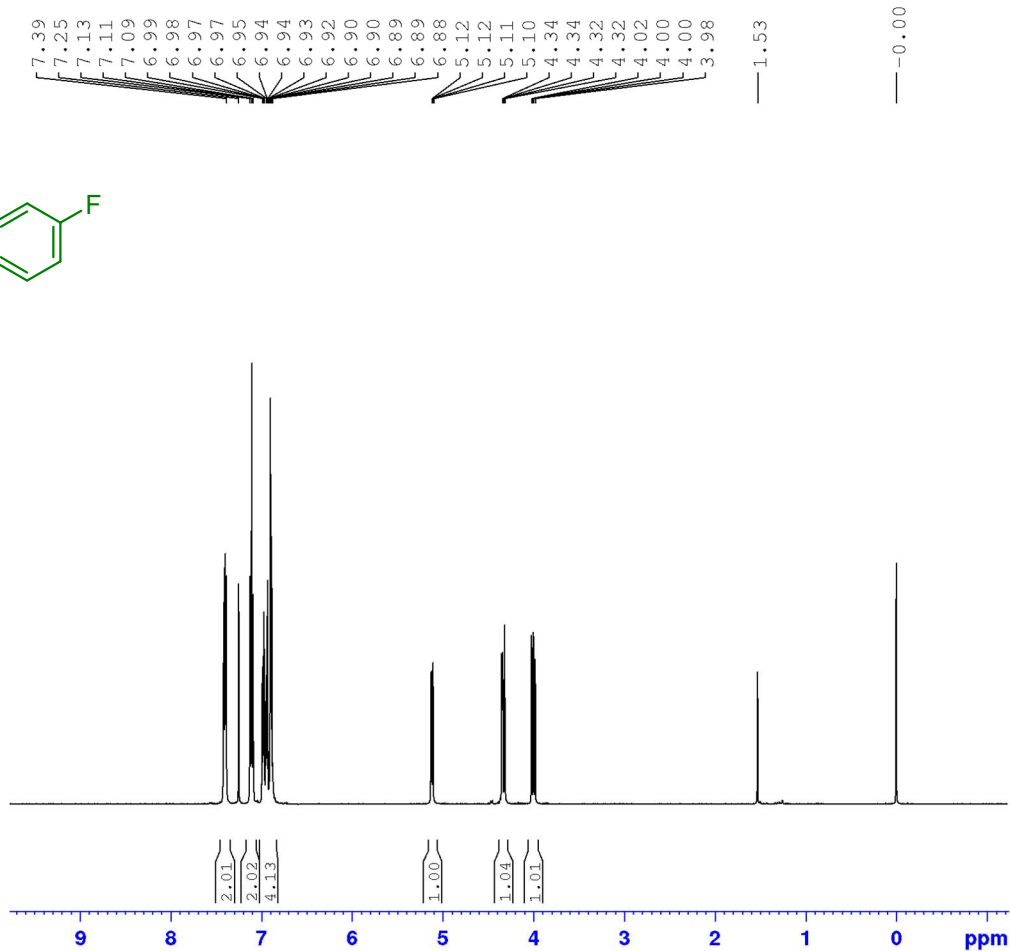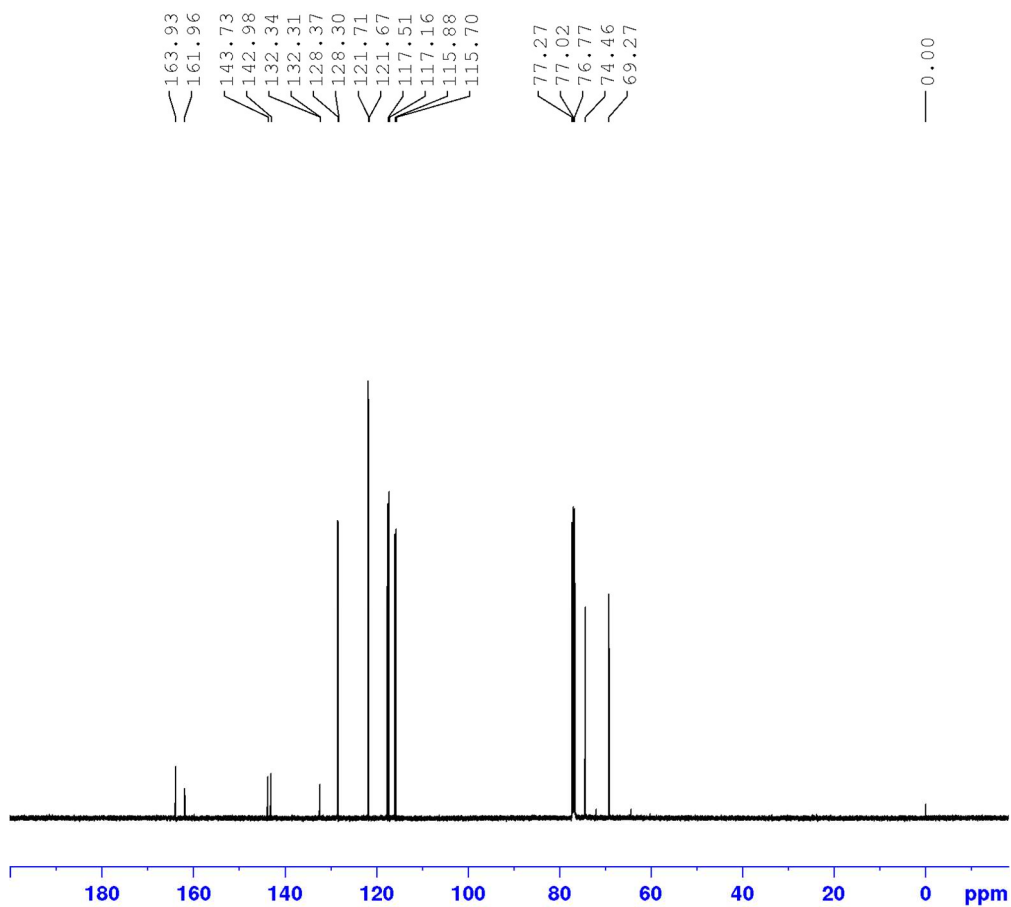

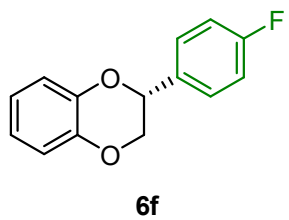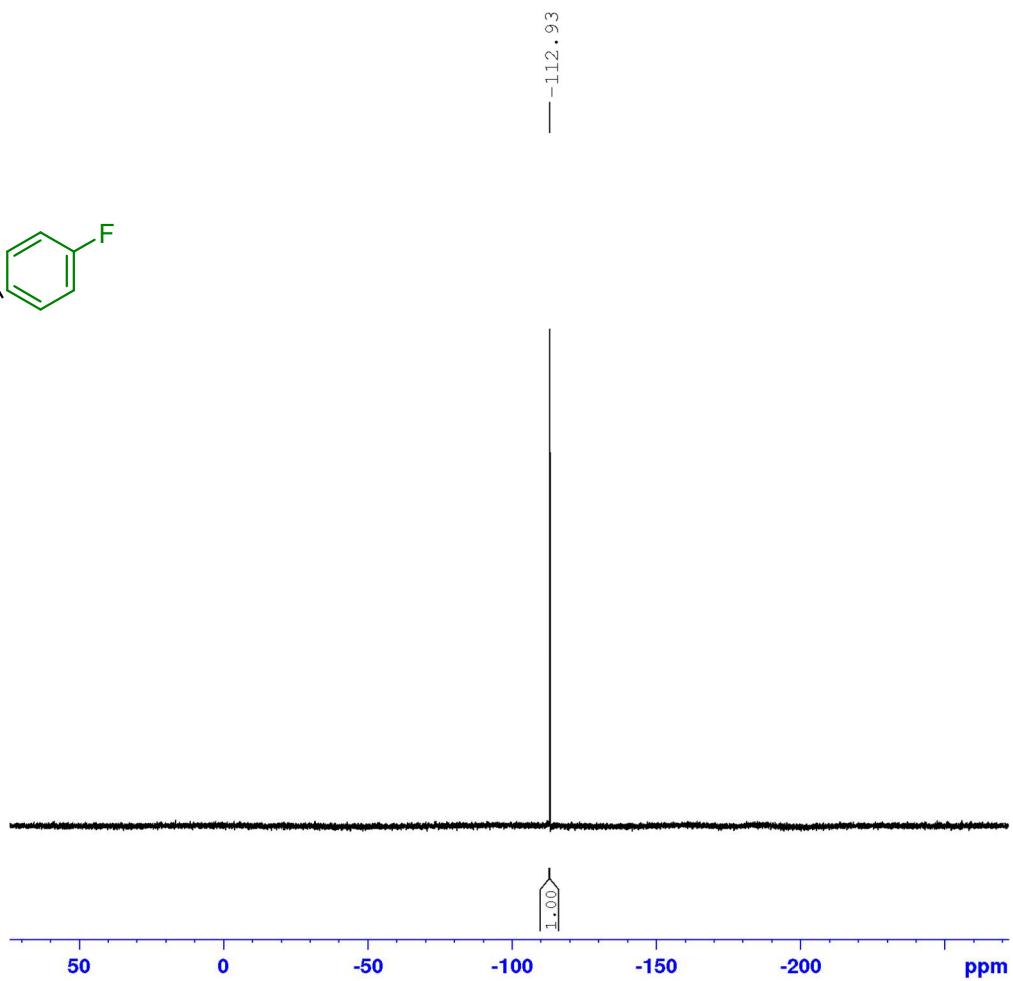

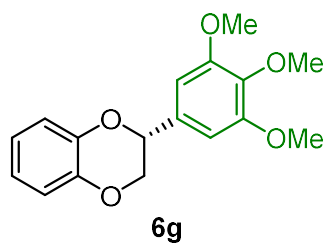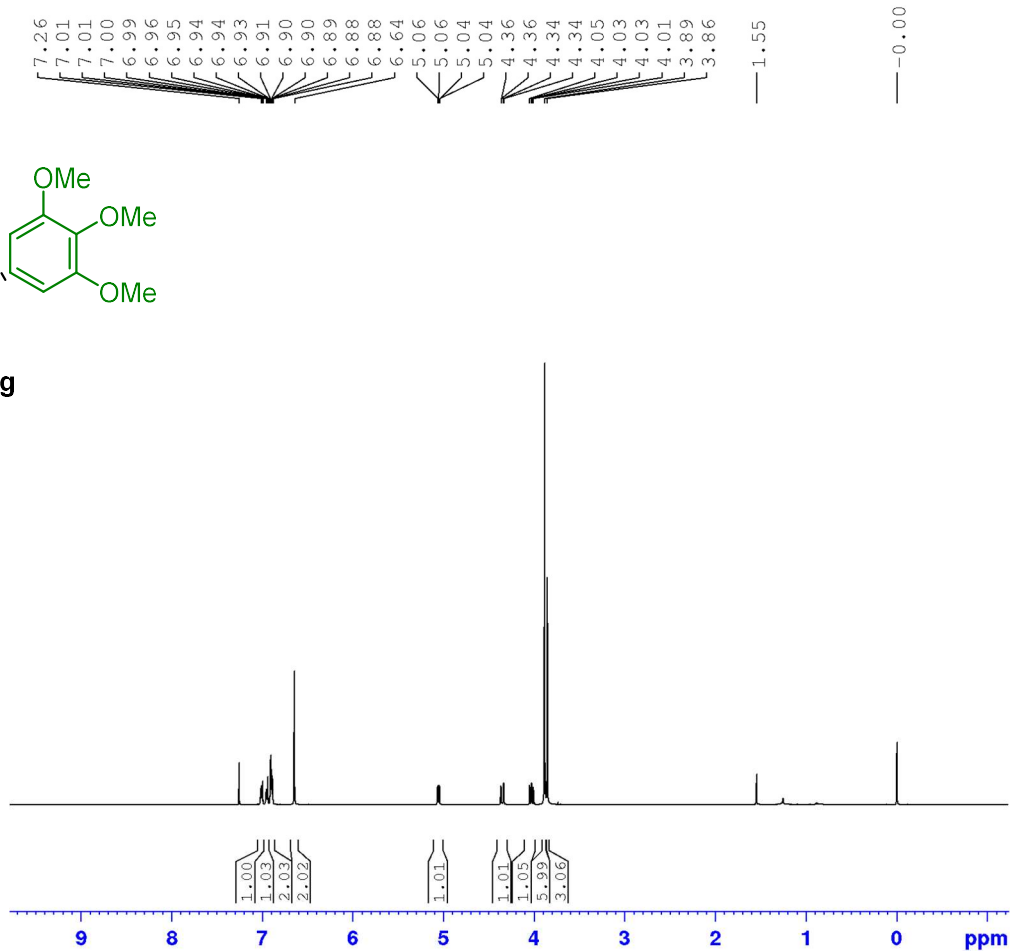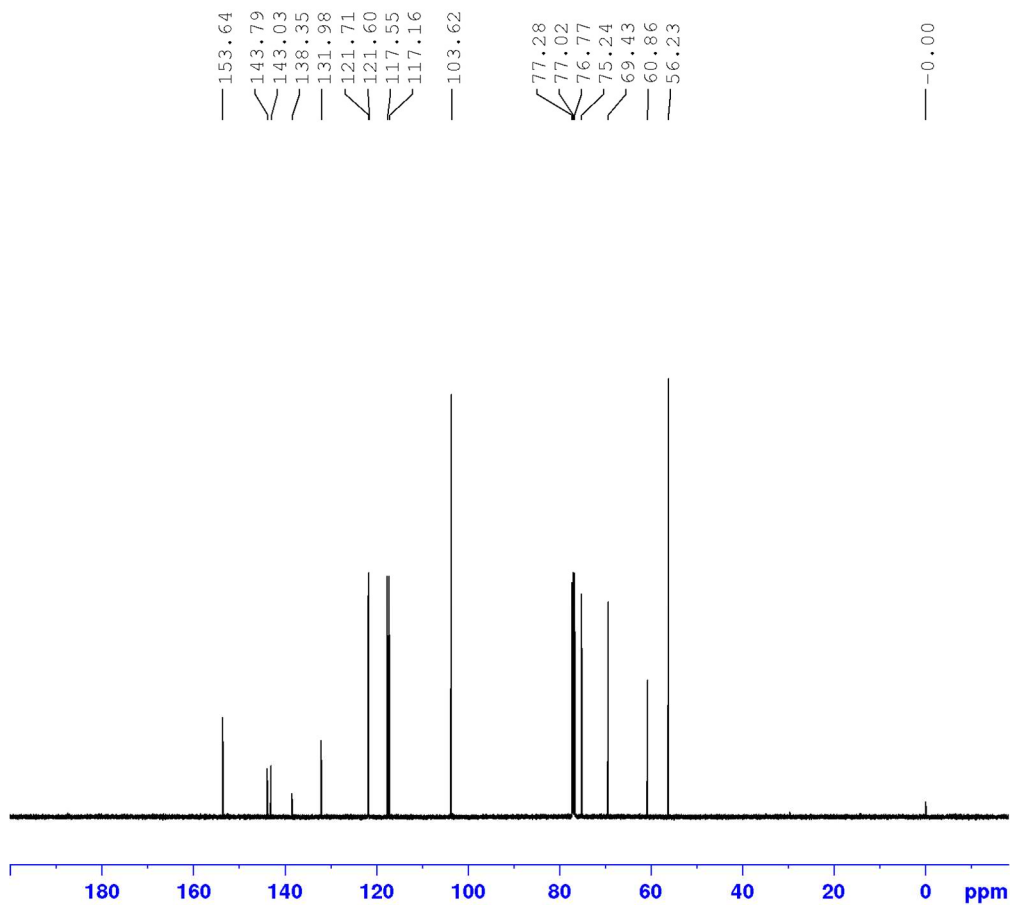

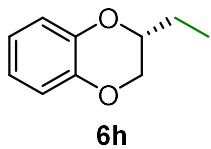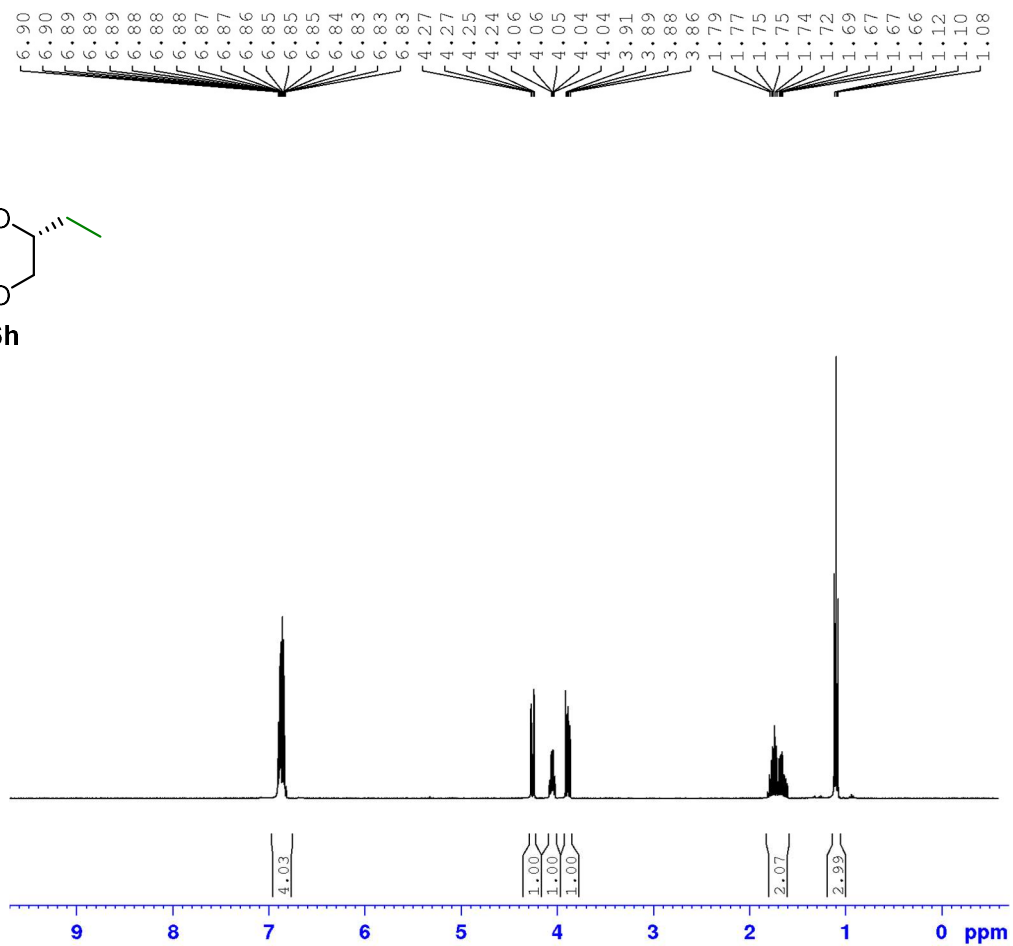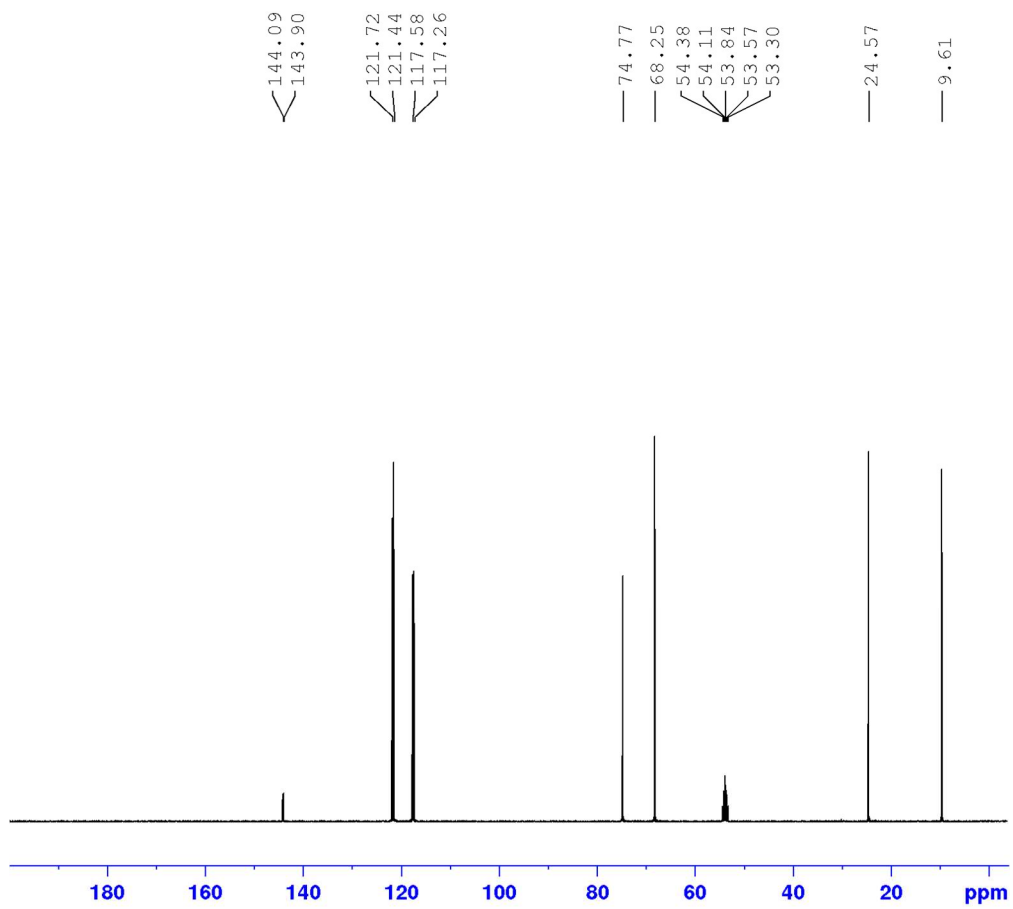

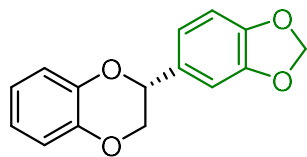

6i

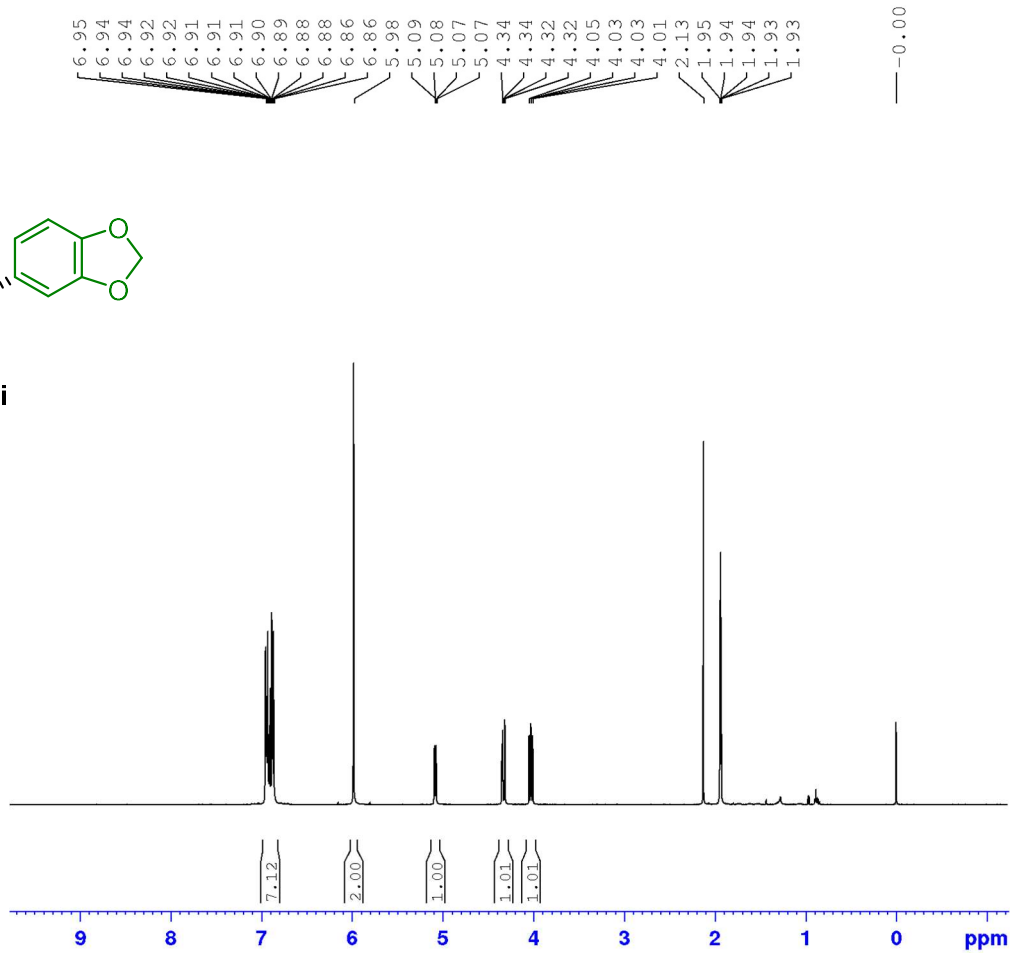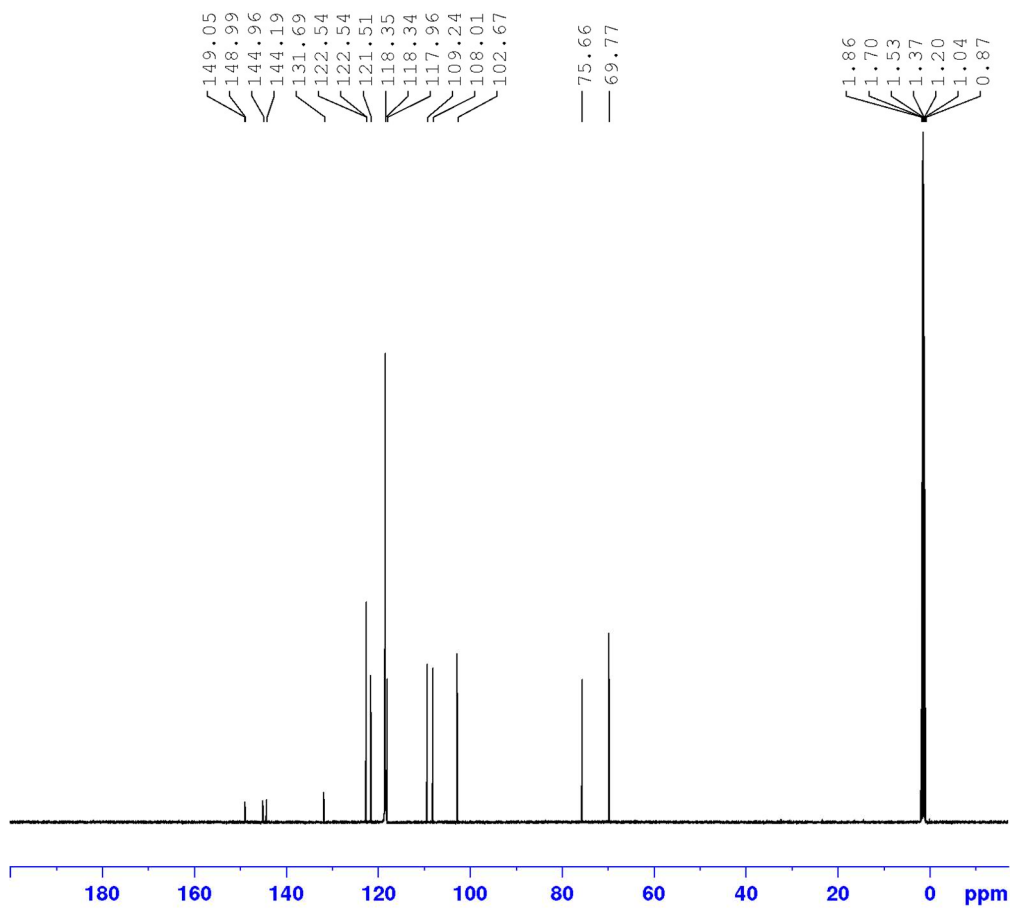

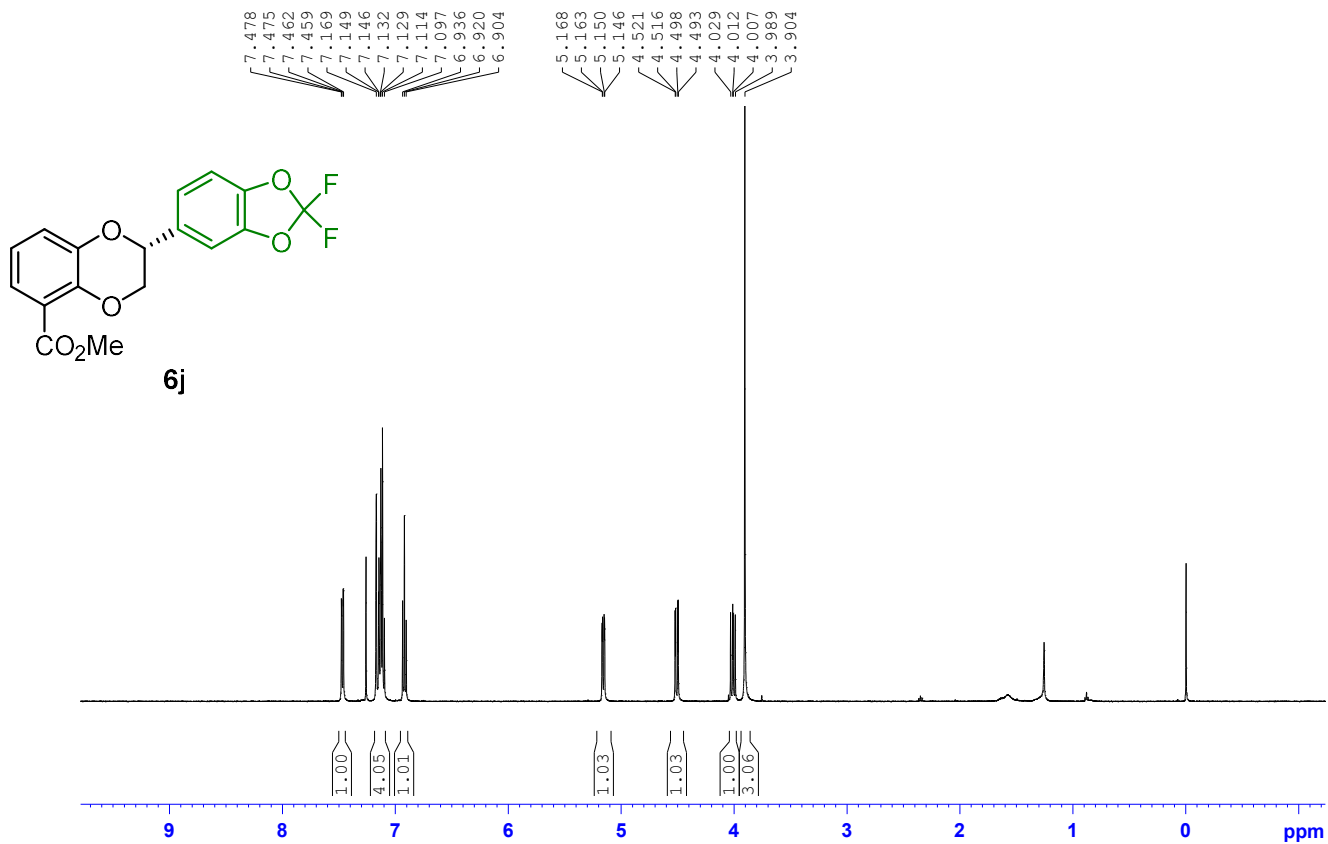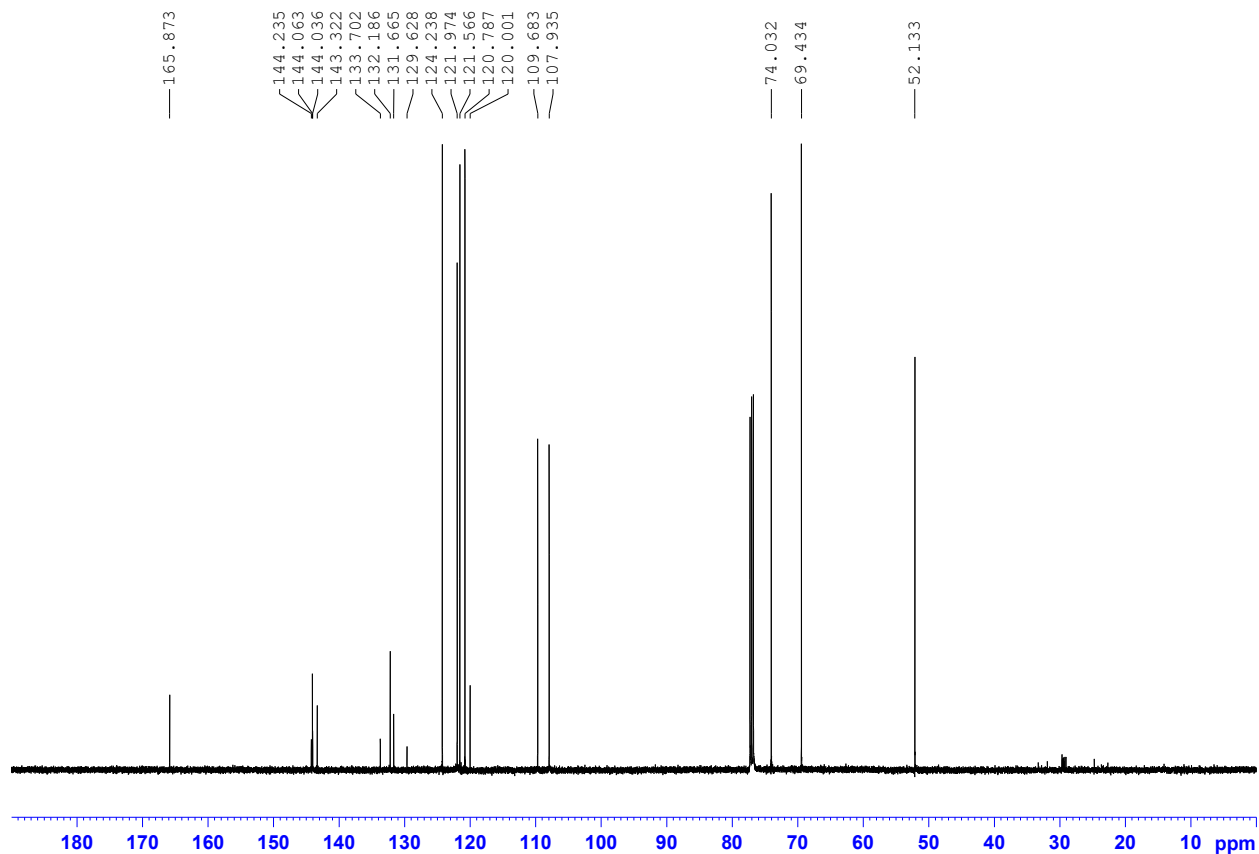



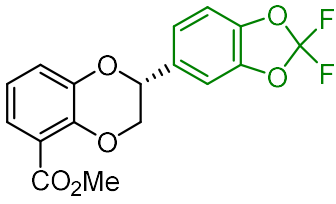

6j

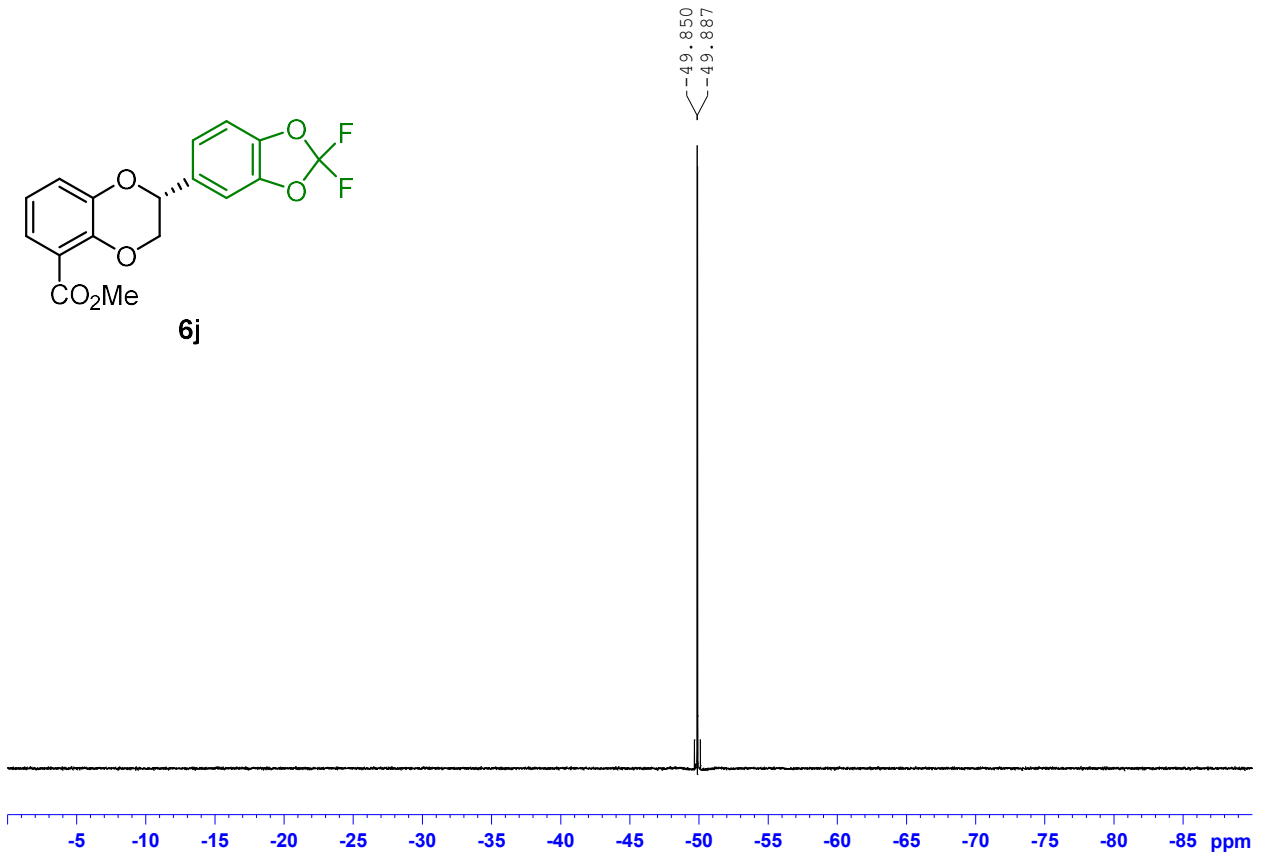

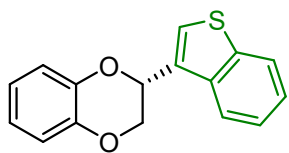

6k

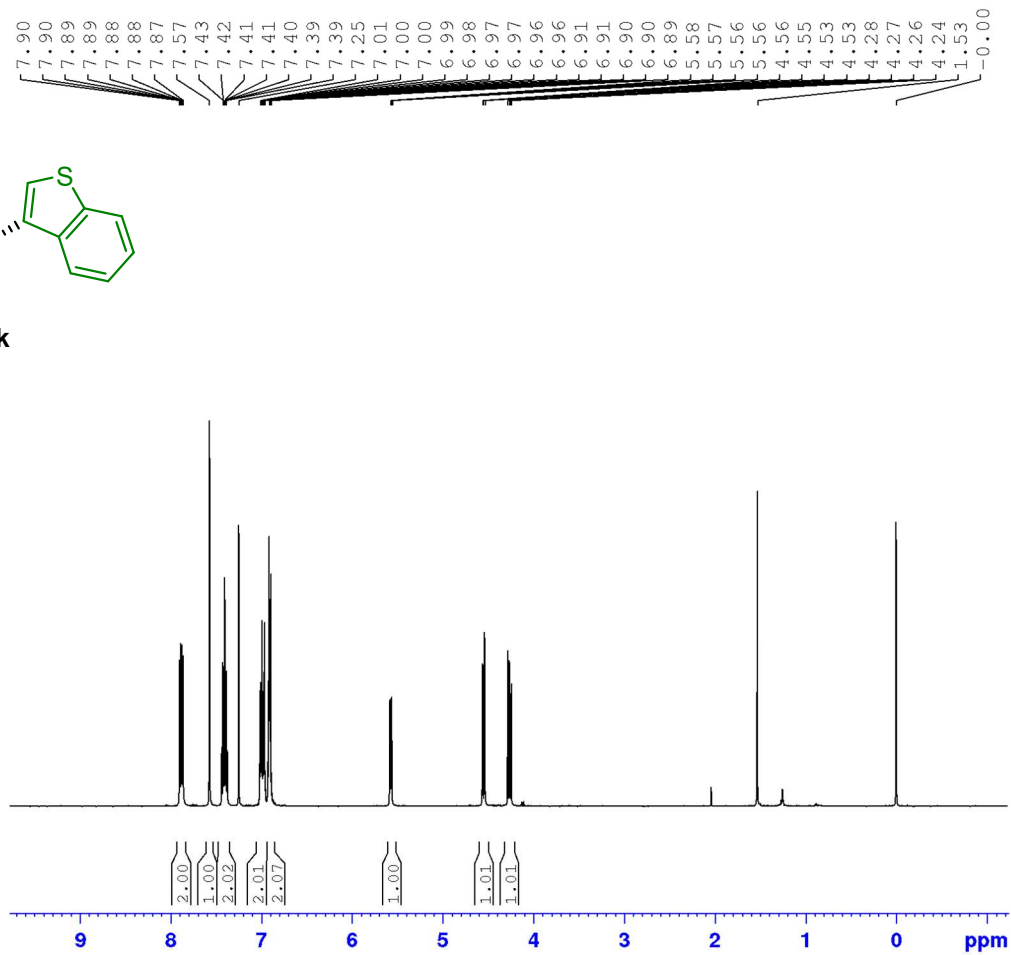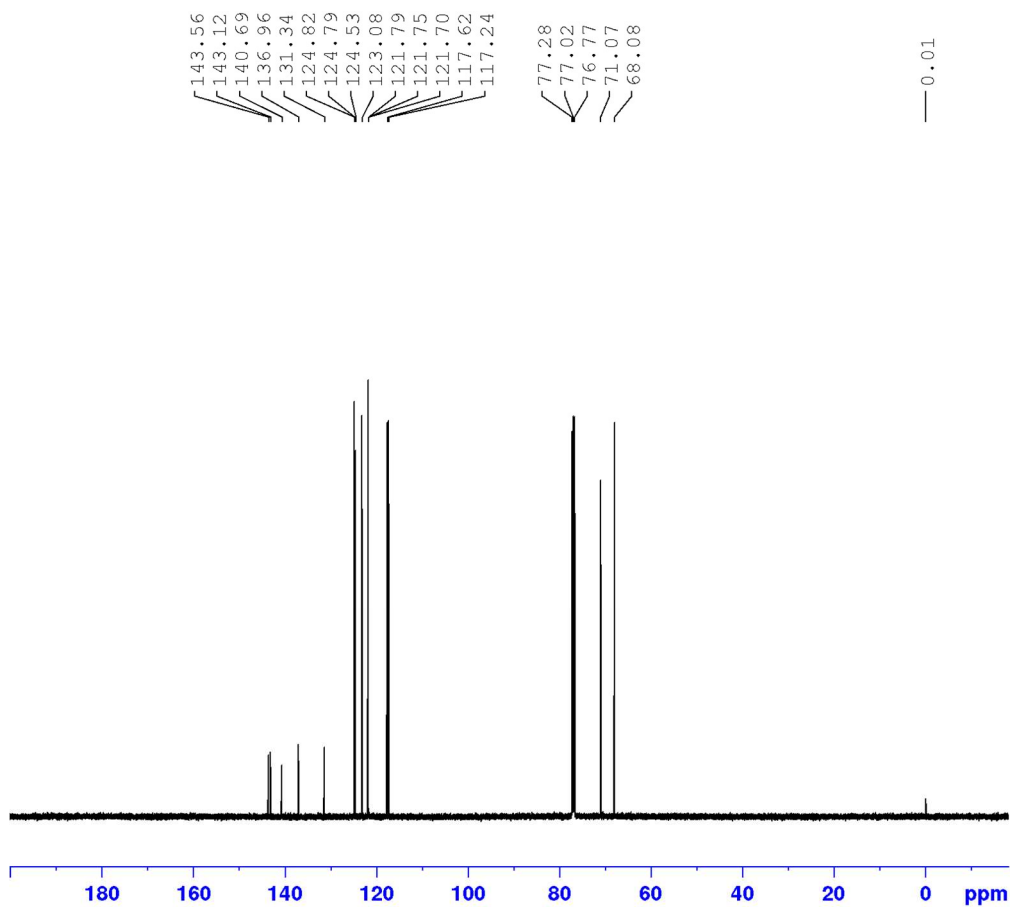

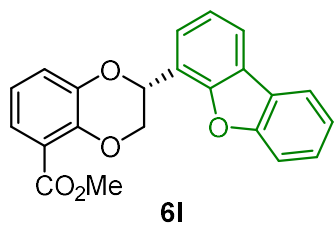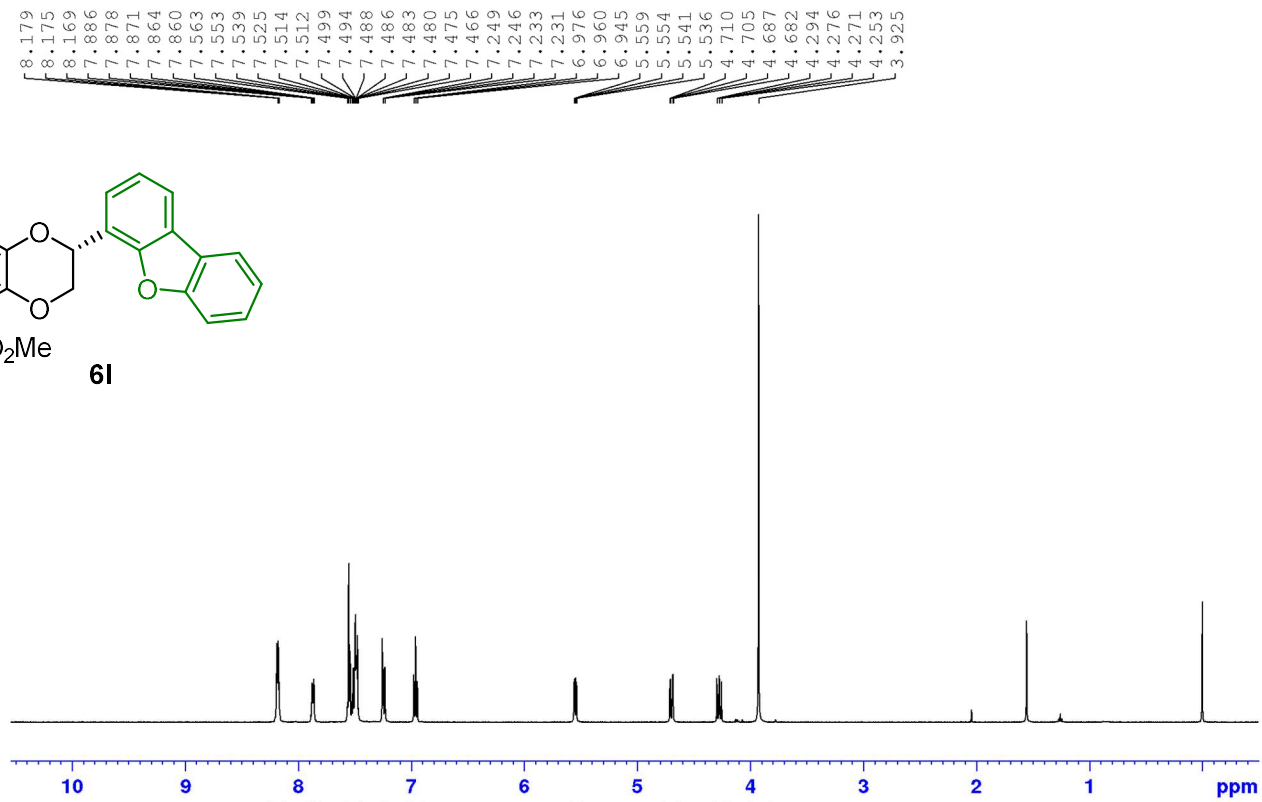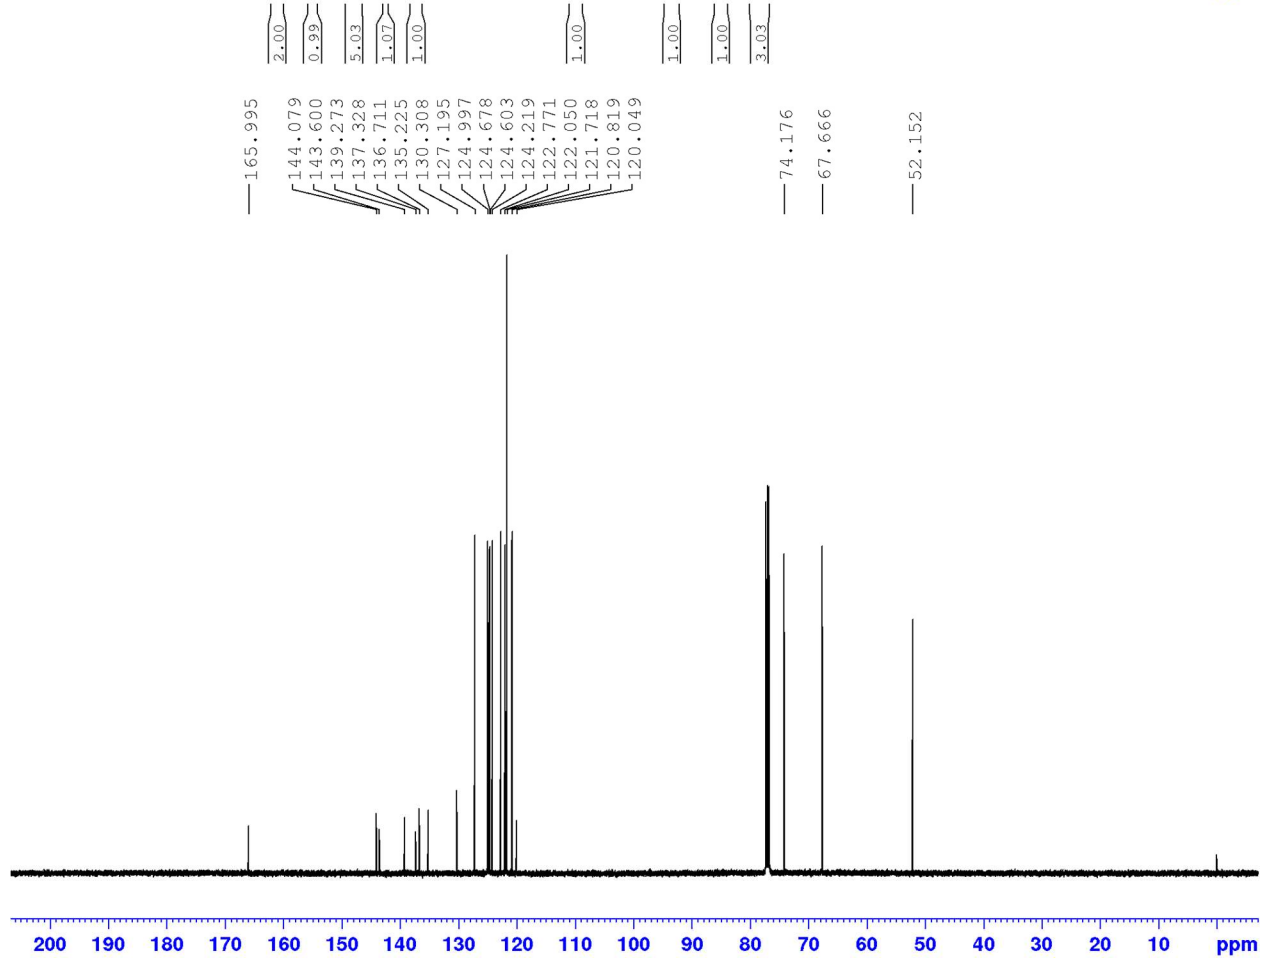



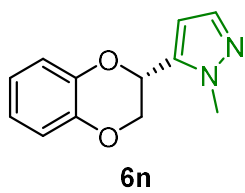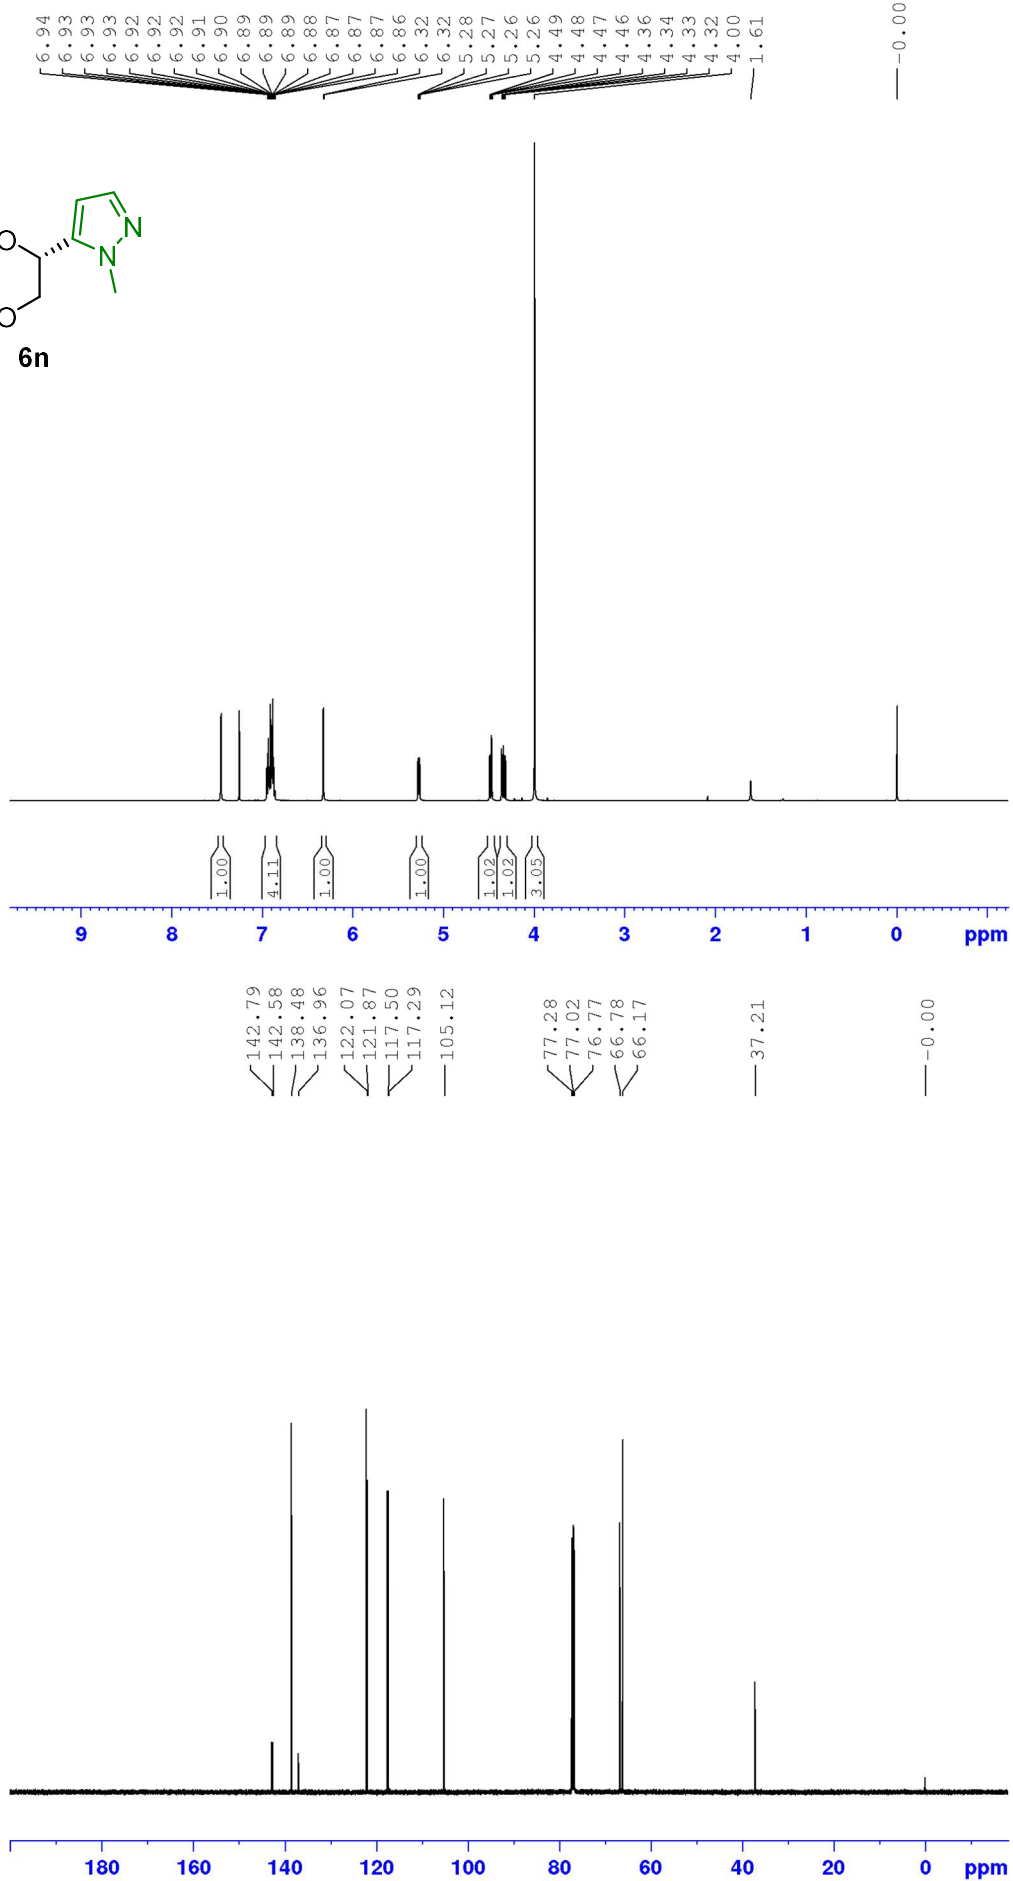

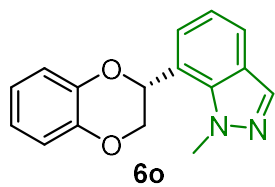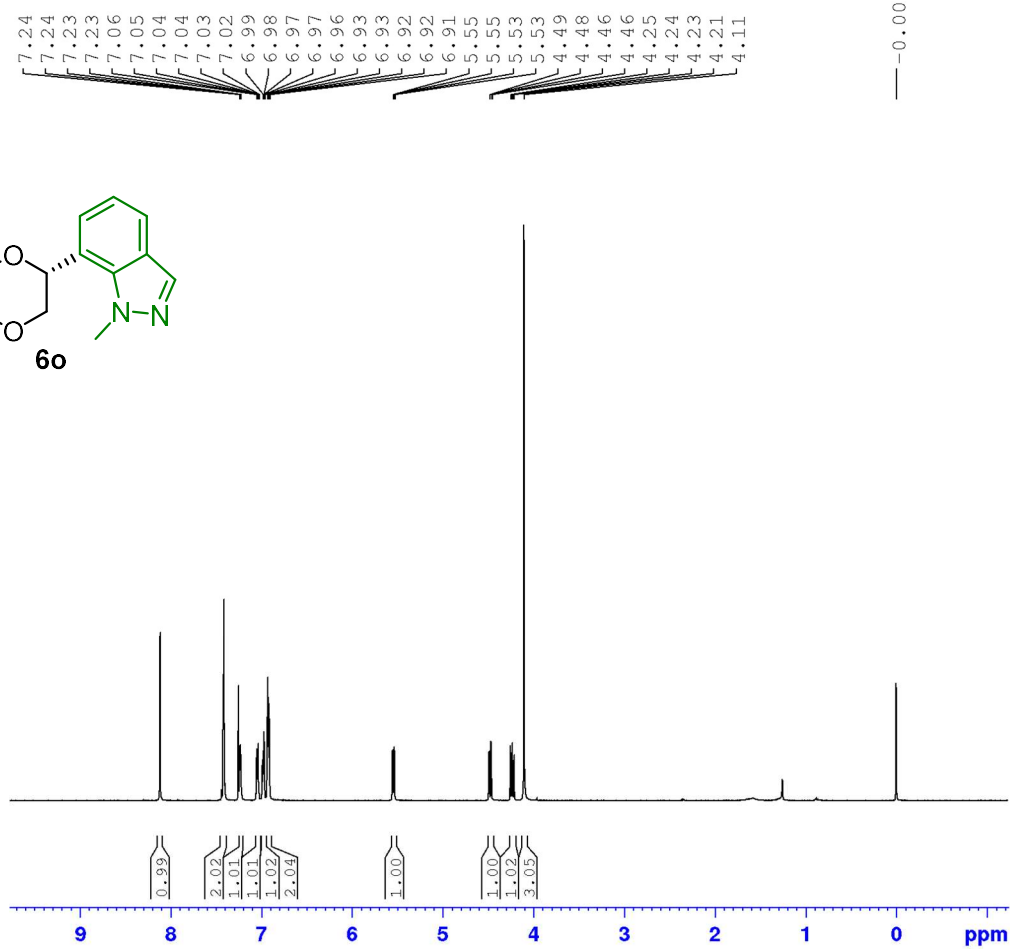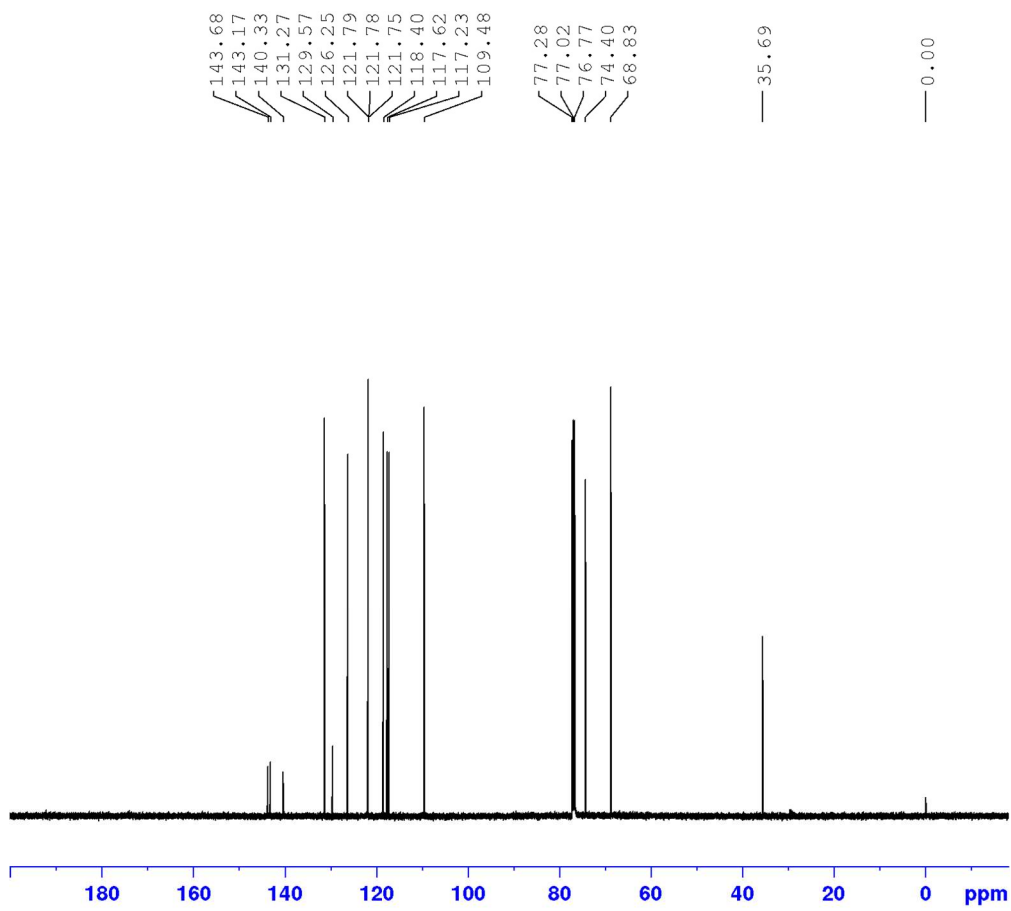

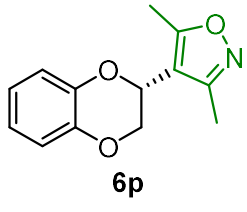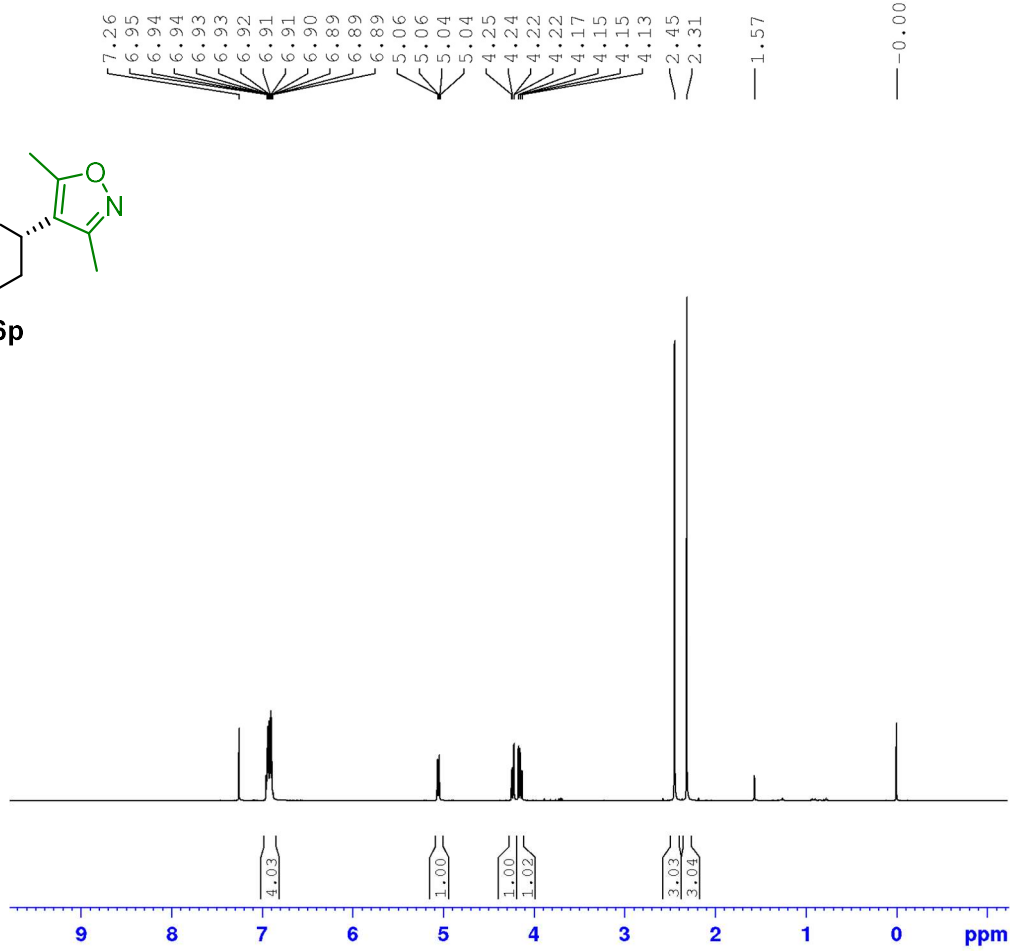

7.26  
6.95  
6.94  
6.94  
6.93  
6.93  
6.92  
6.91  
6.91  
6.90  
6.89  
6.89  
5.06  
5.04  
5.04  
4.25  
4.24  
4.22  
4.22  
4.17  
4.15  
4.15  
4.13  
2.45  
2.31  
1.57  
-0.00

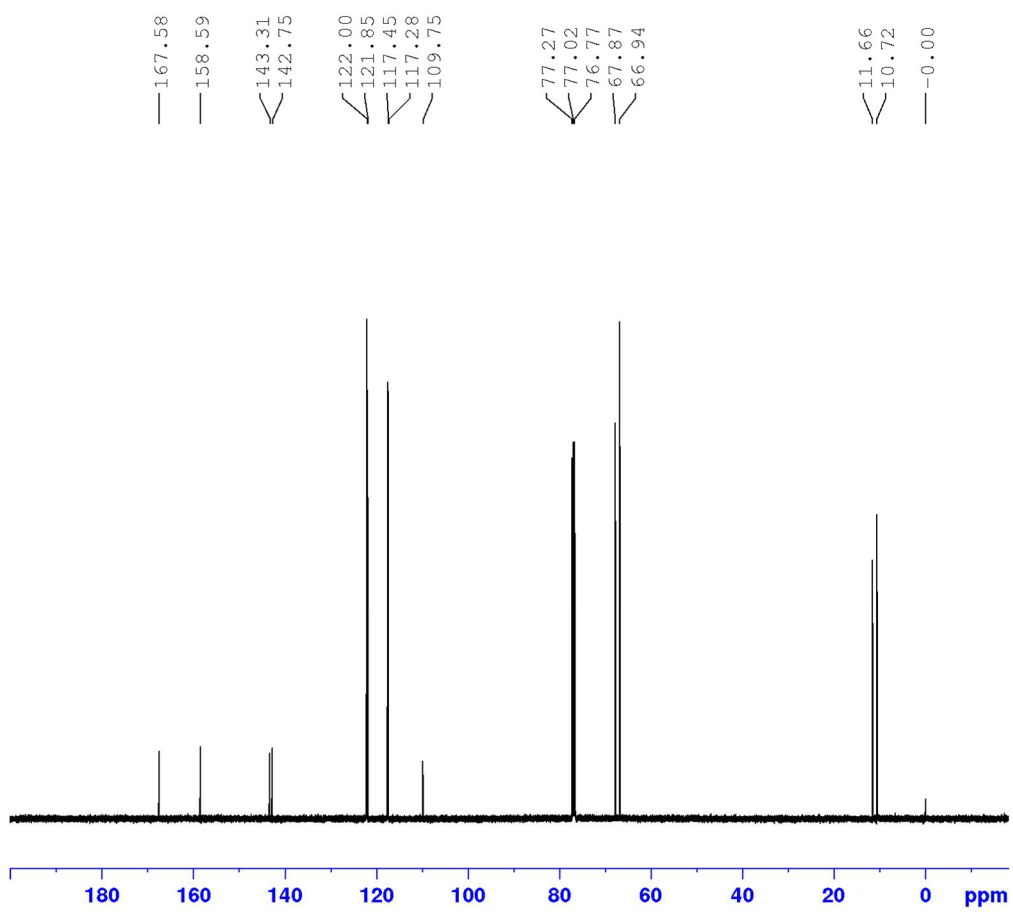

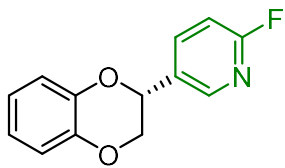

6q

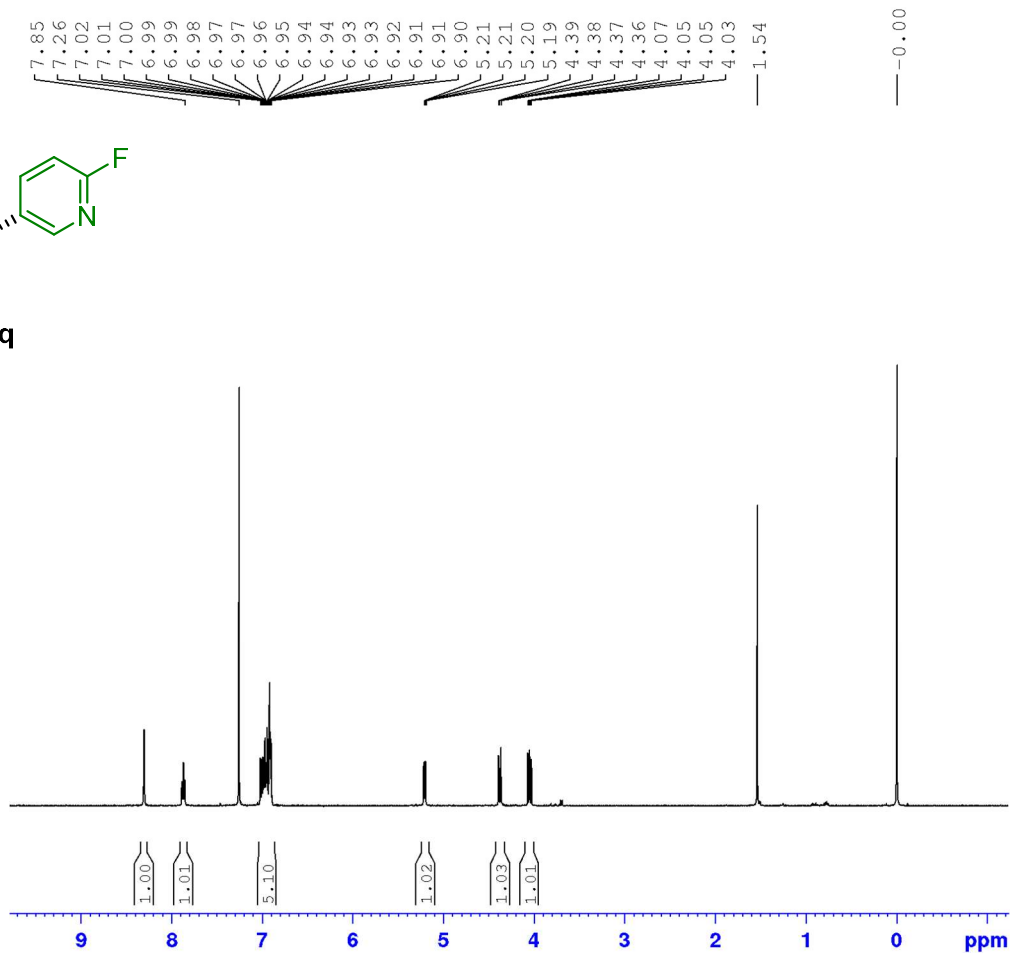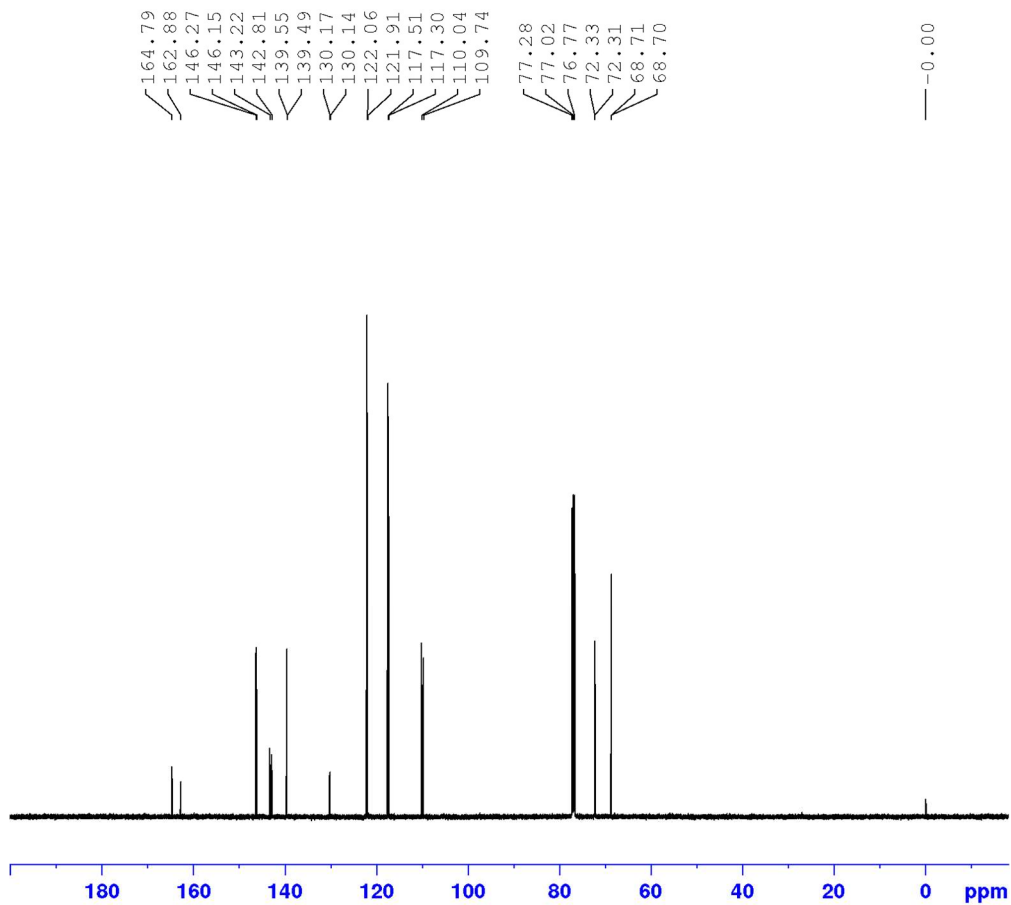



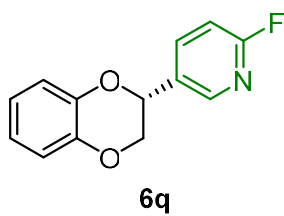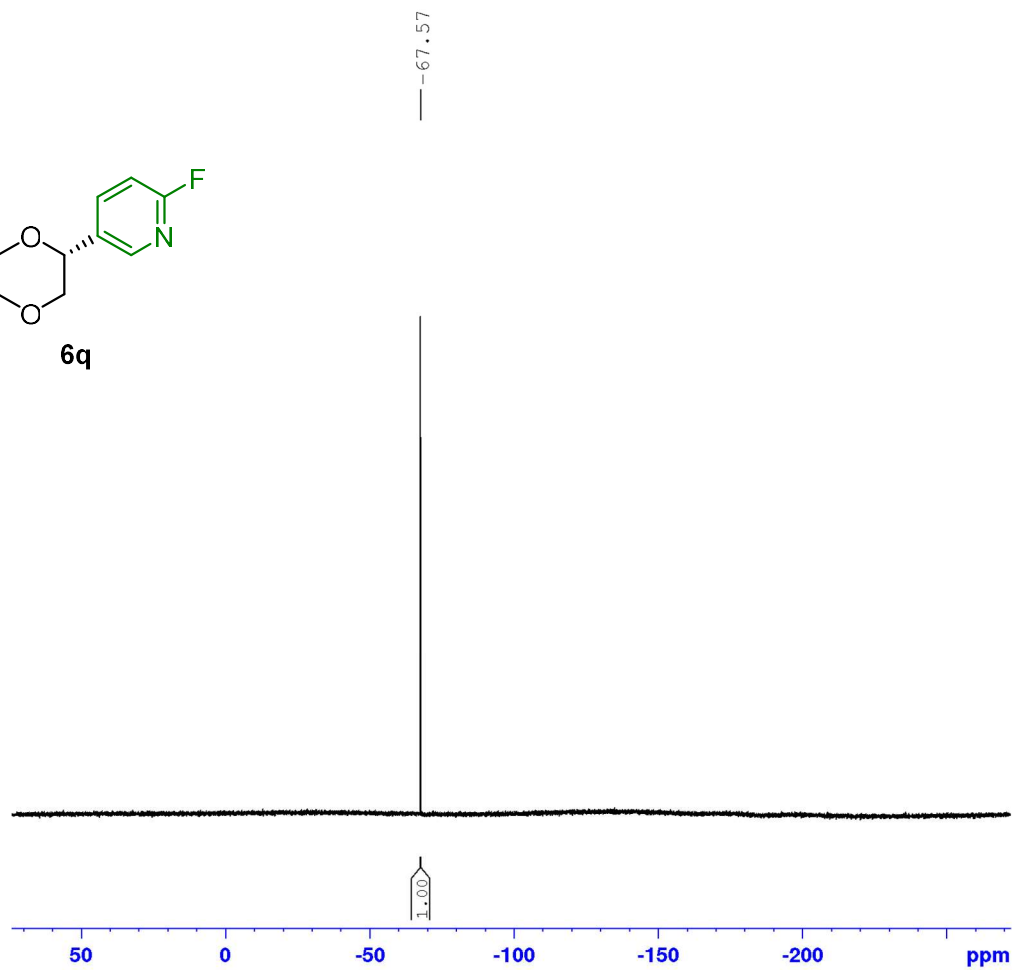

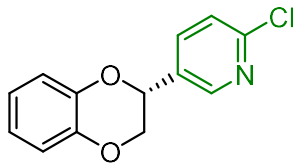

6r

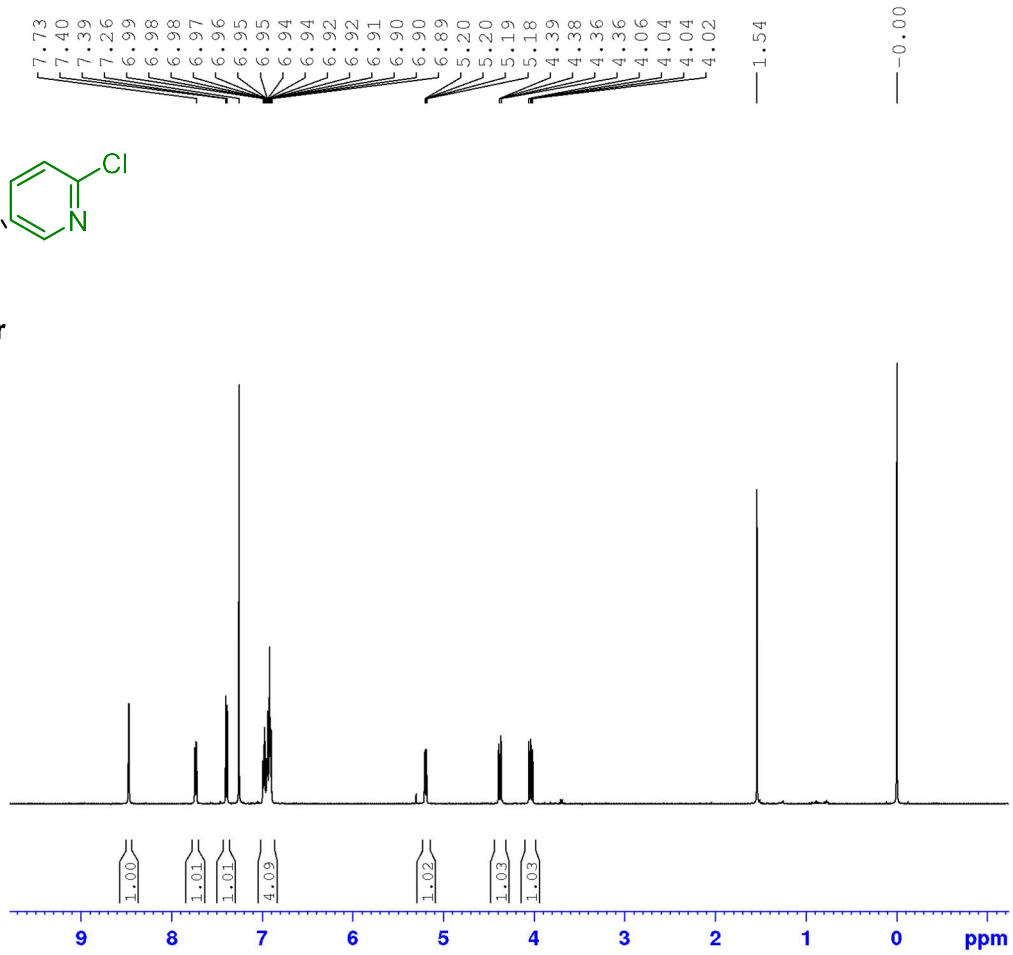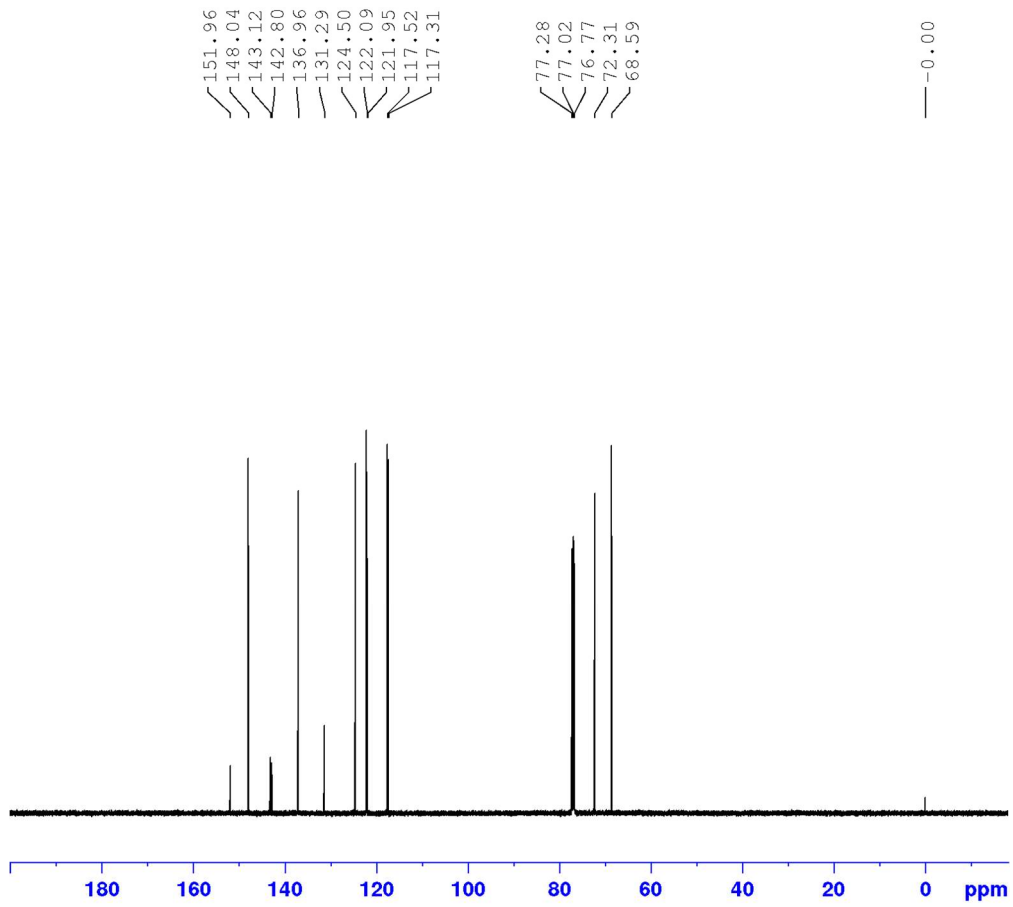

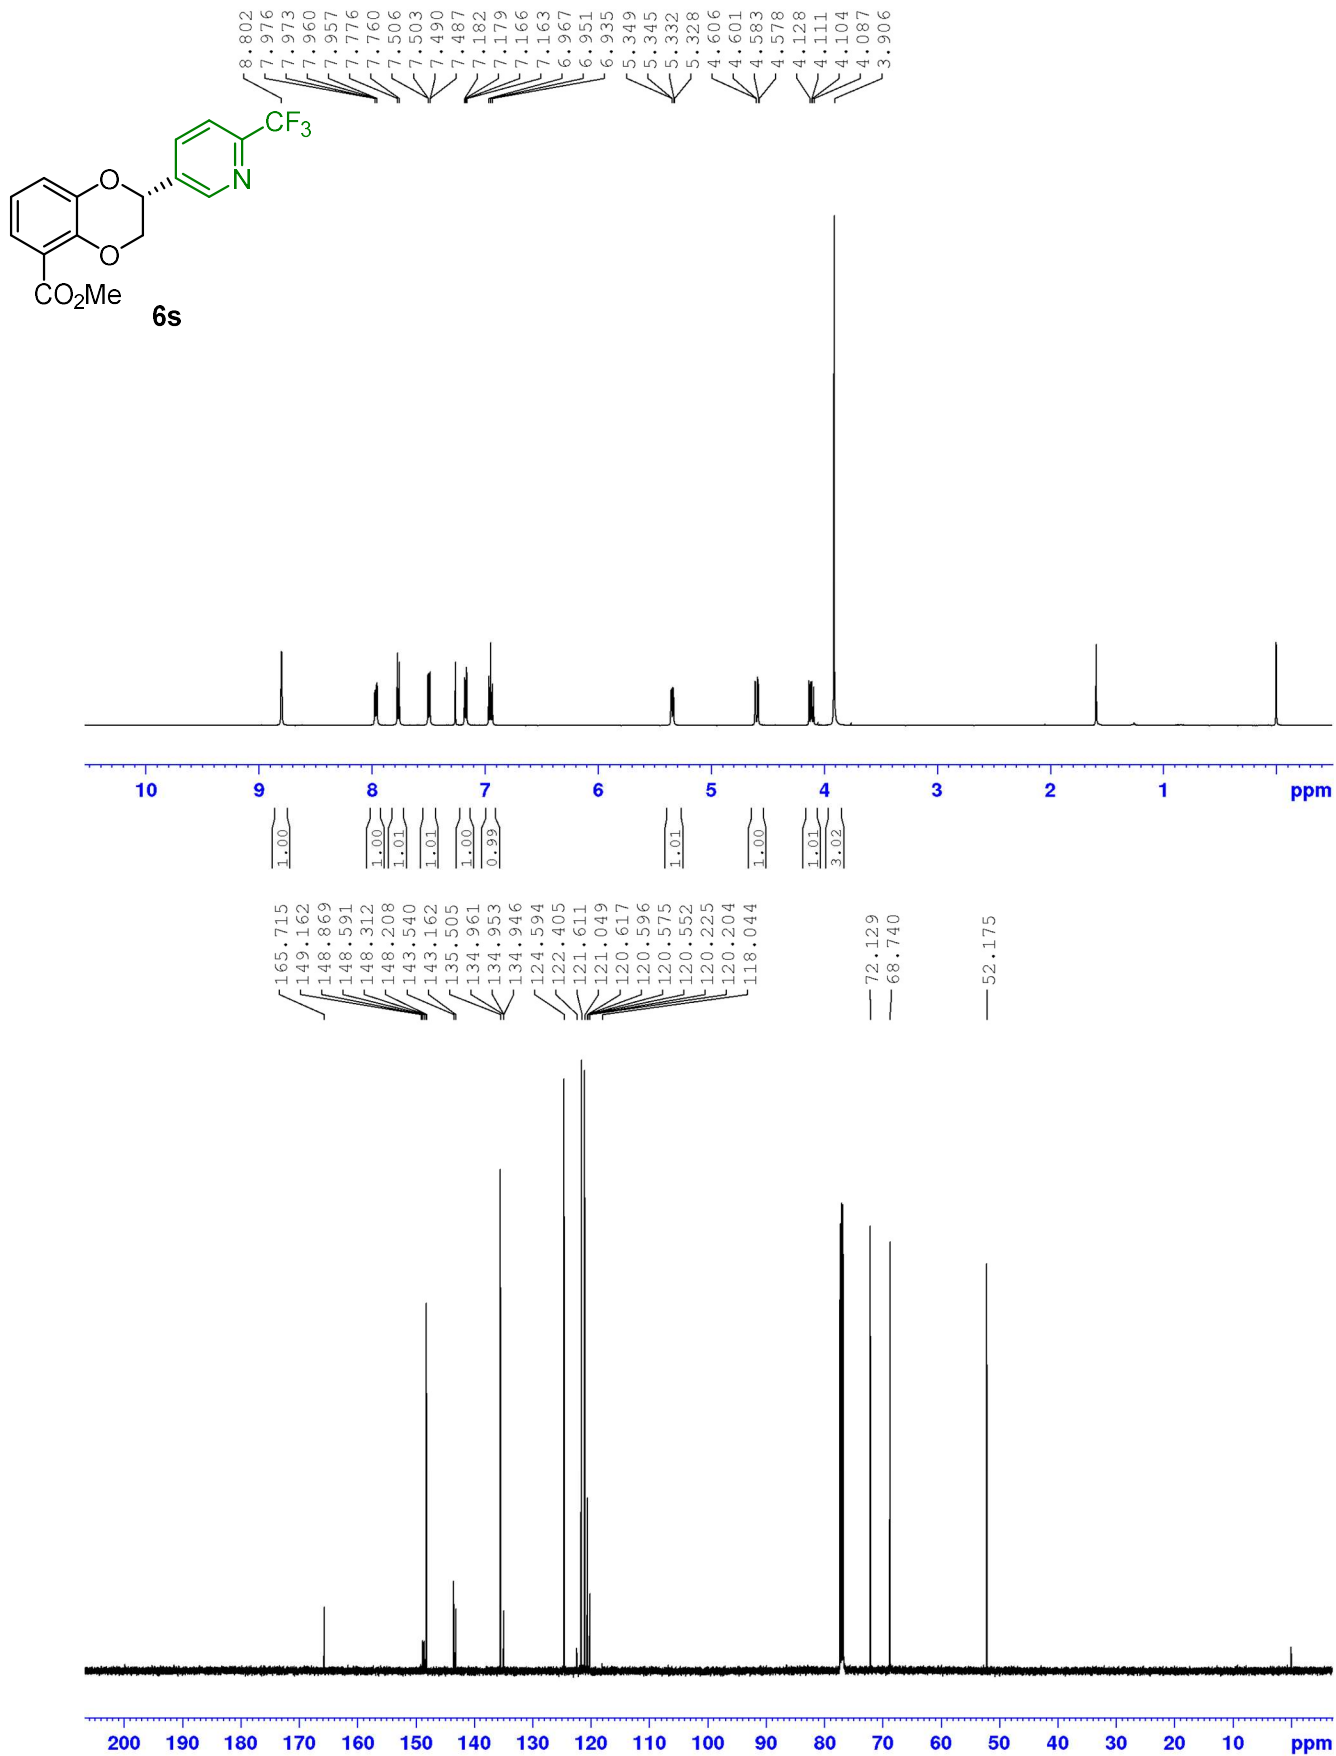

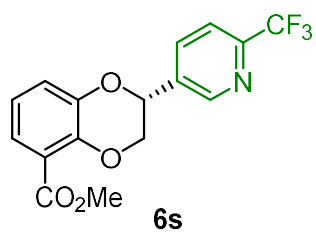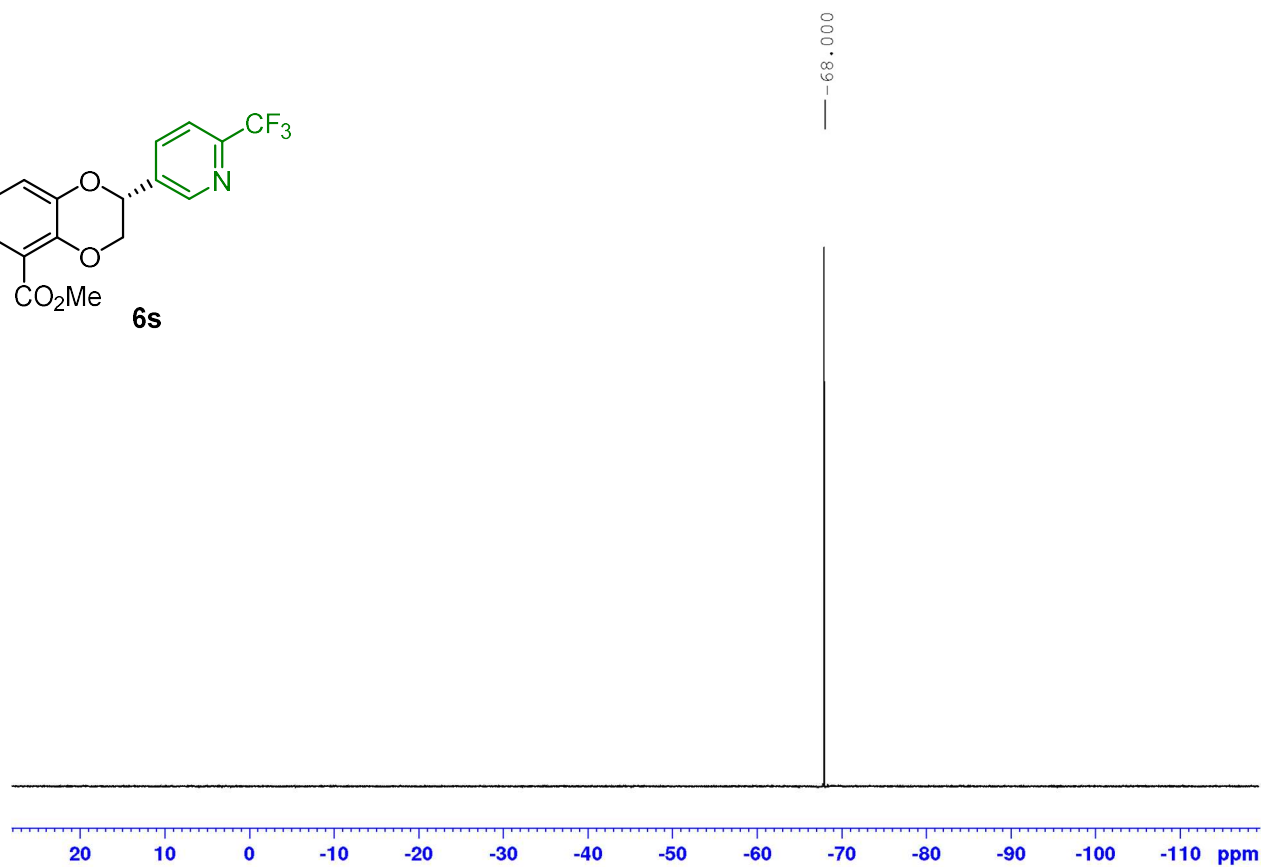

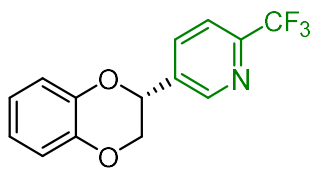

6t

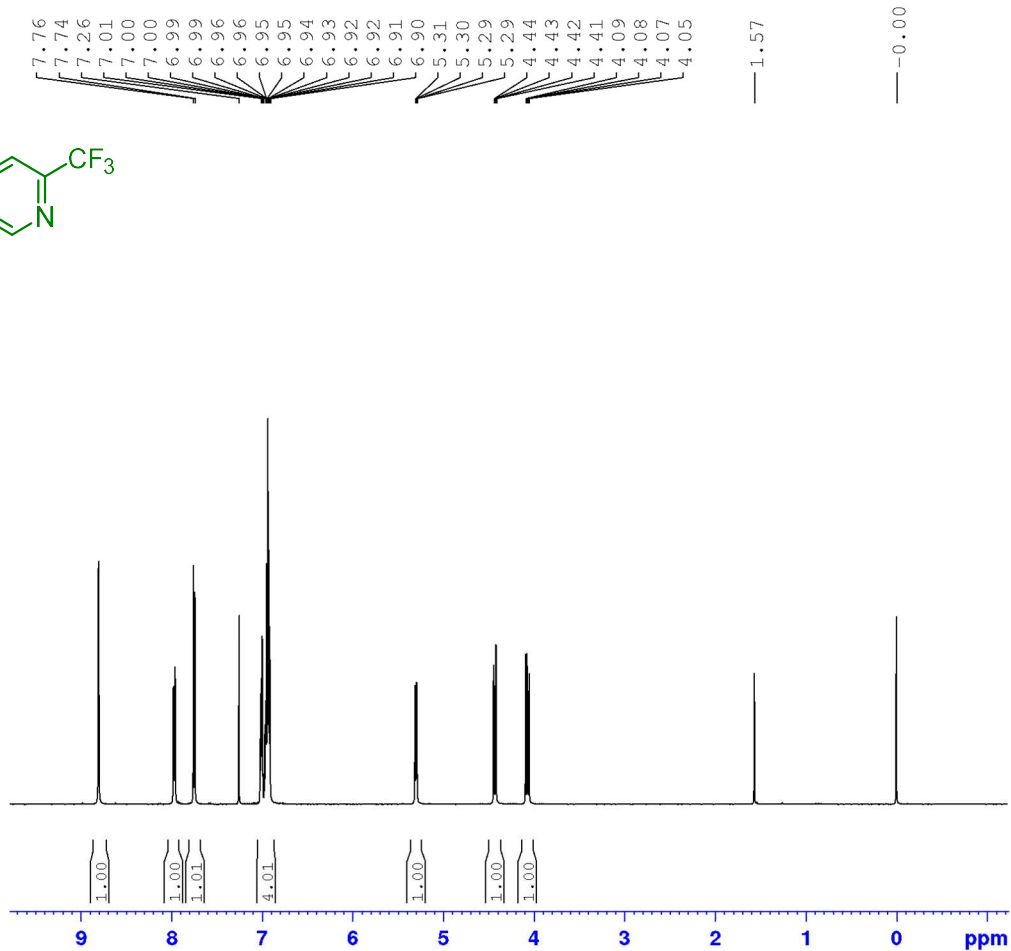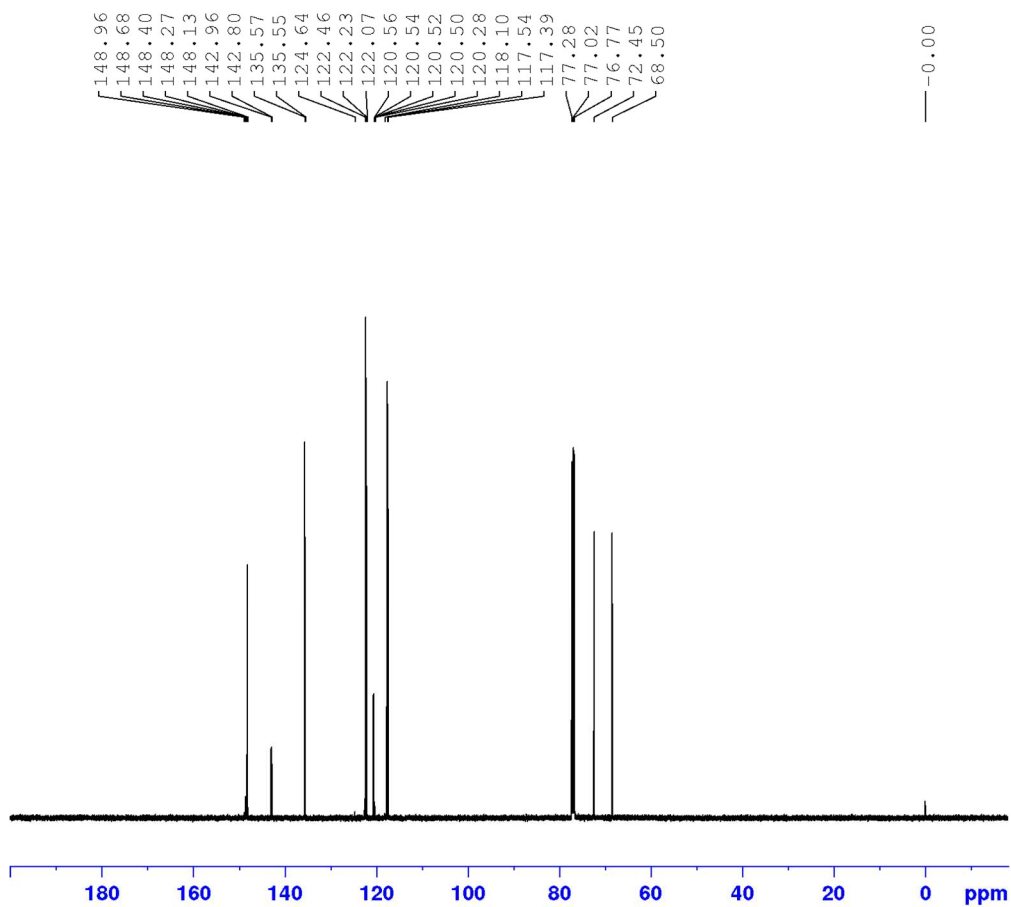

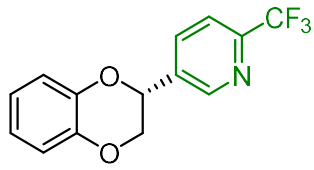

6t

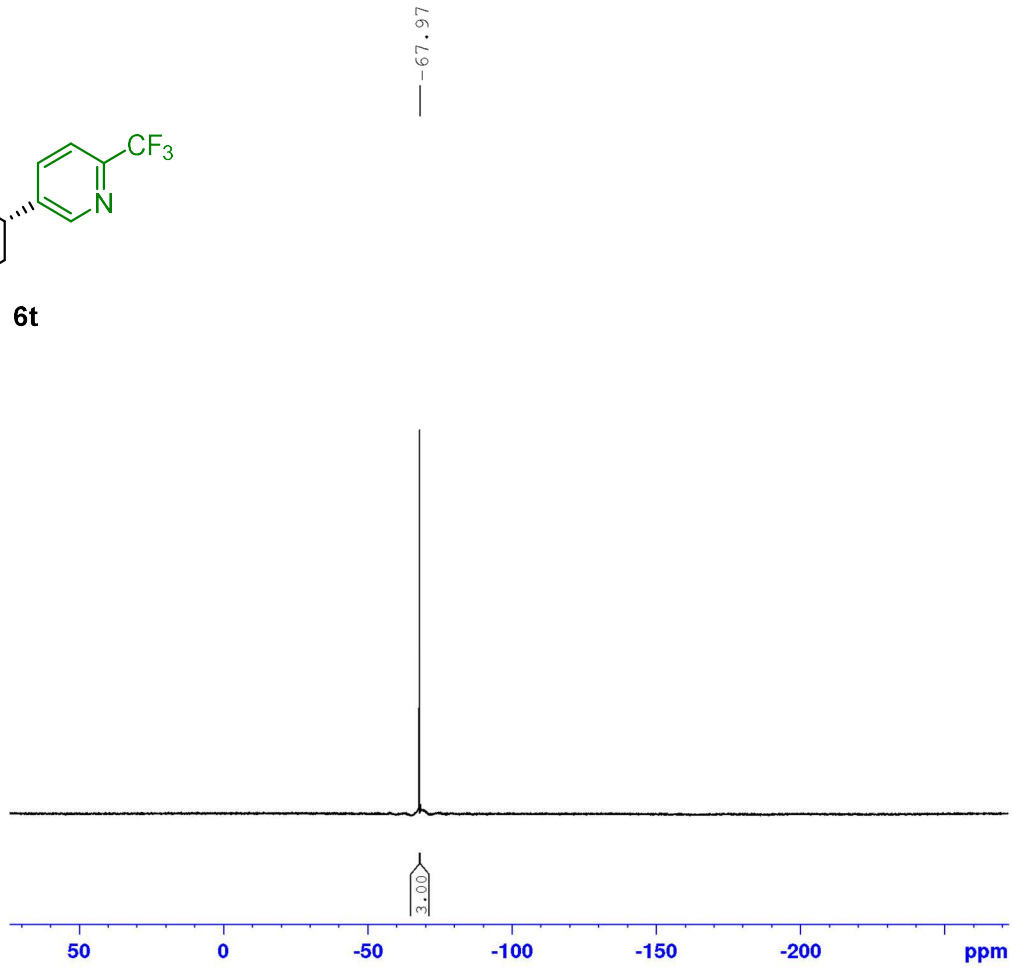

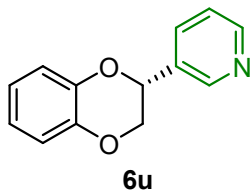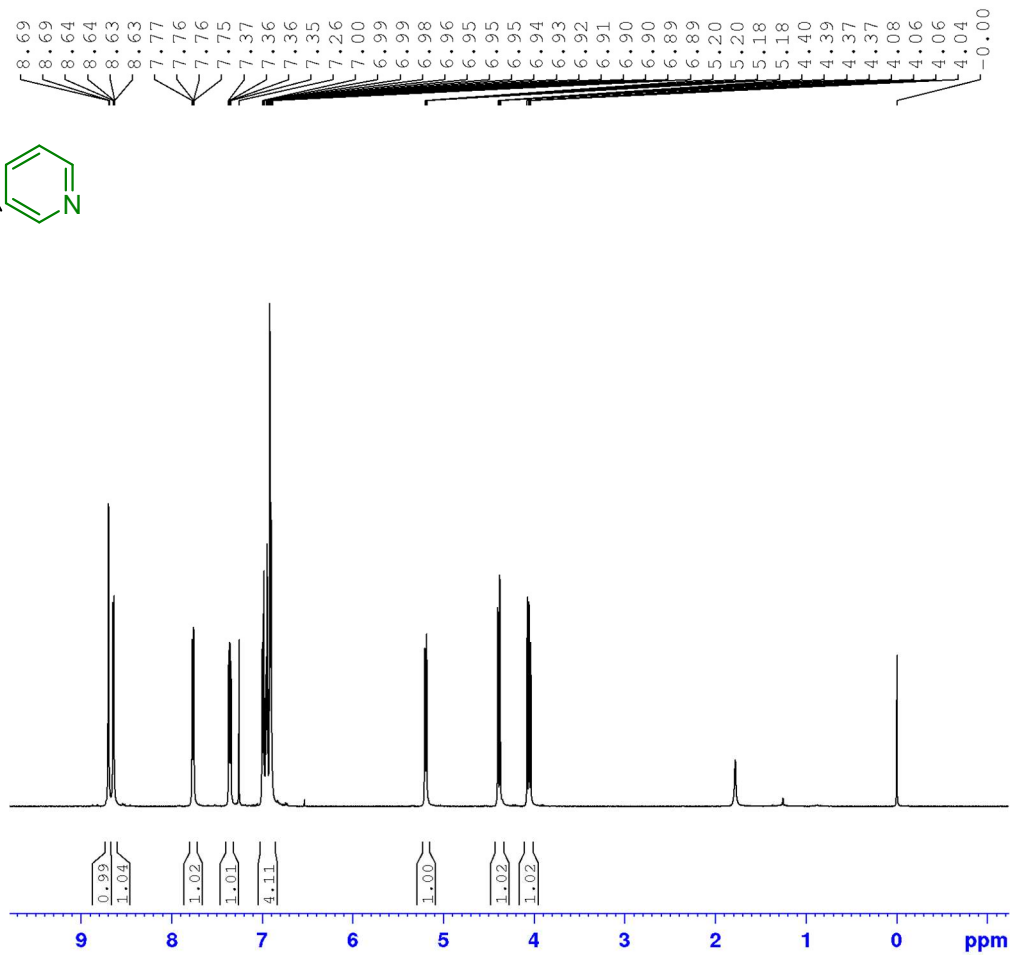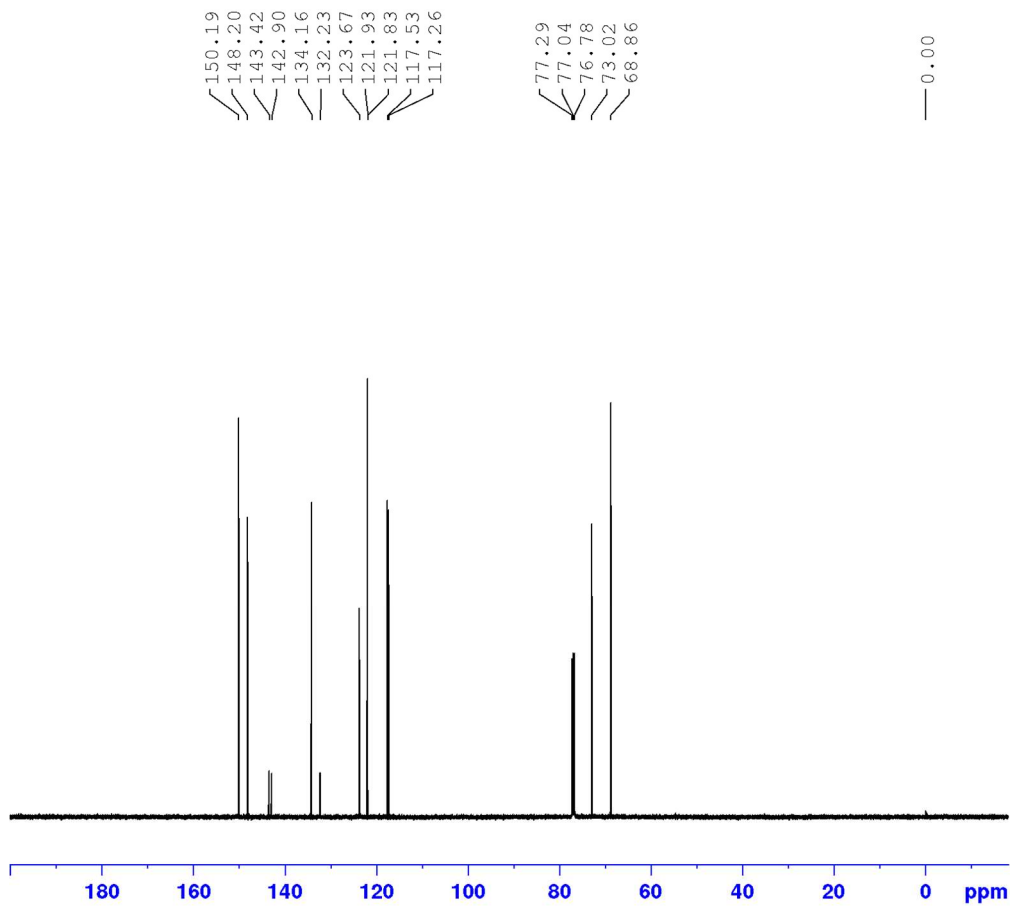

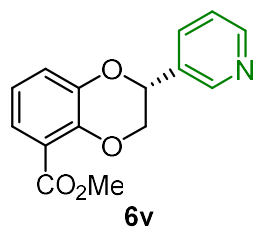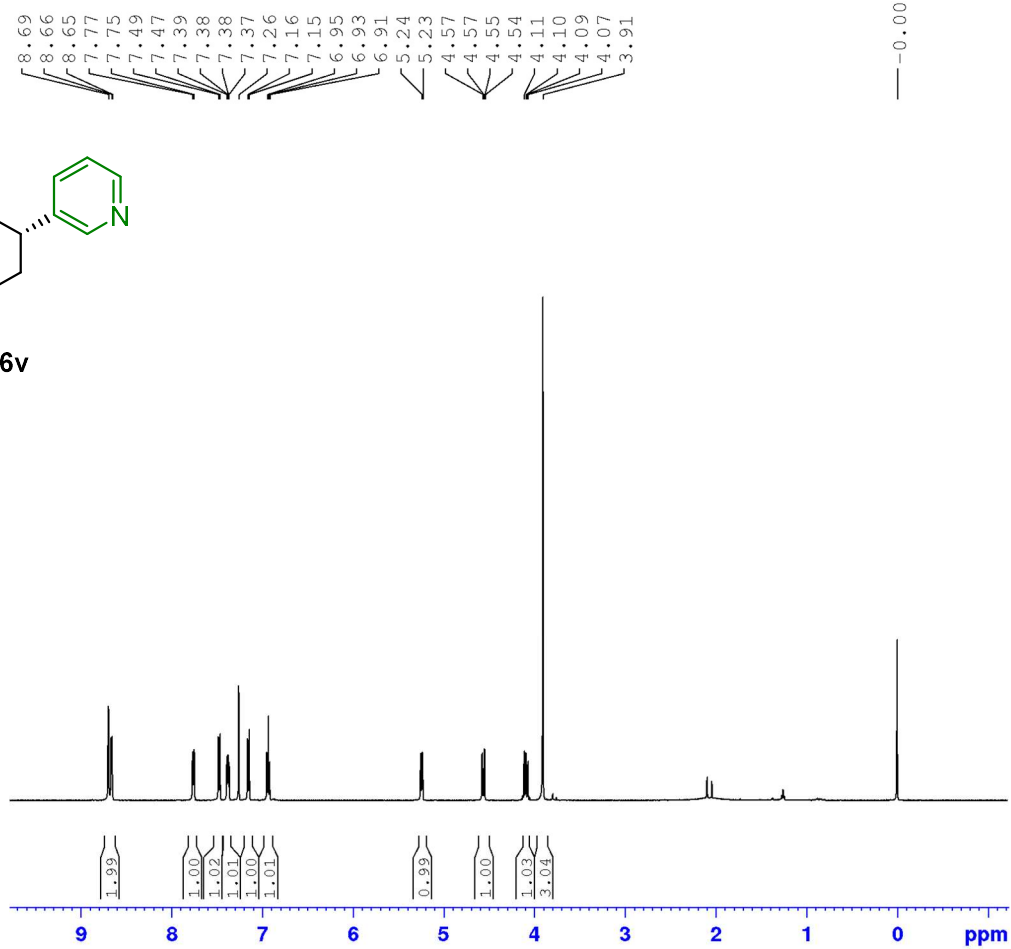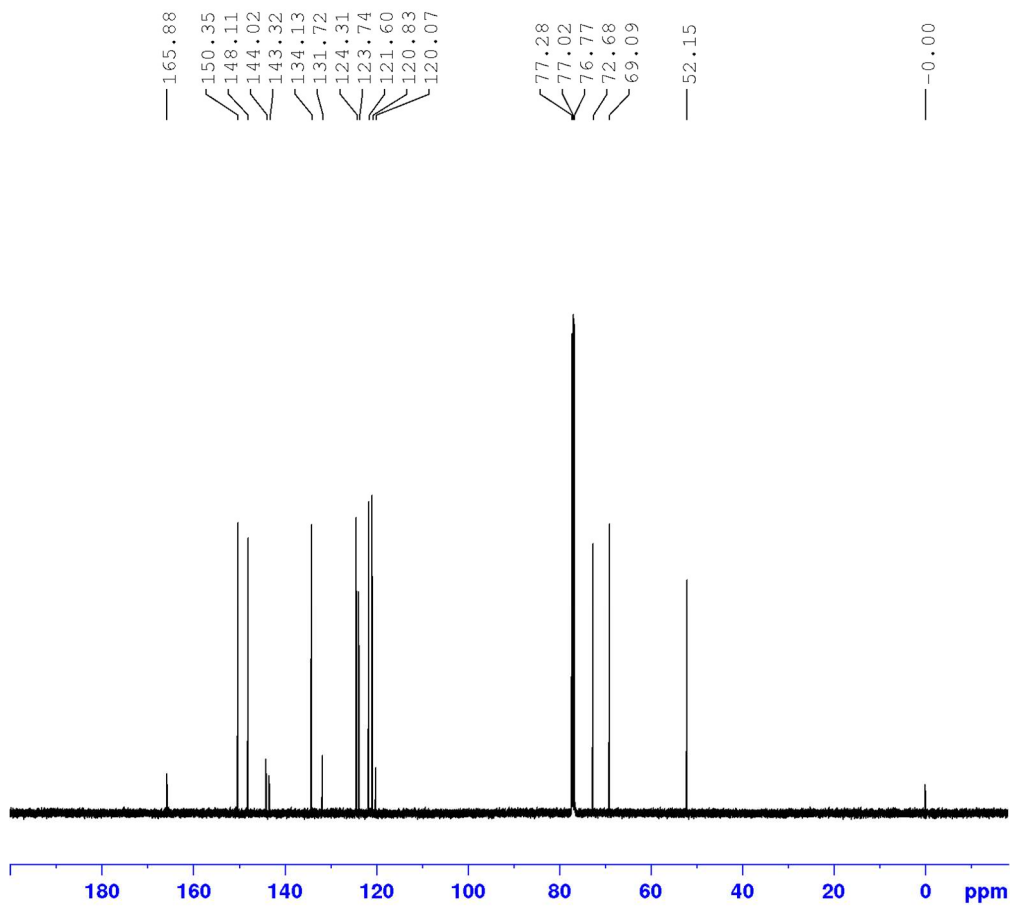



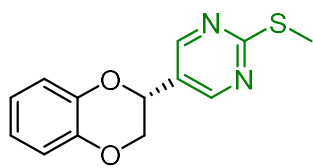

6w

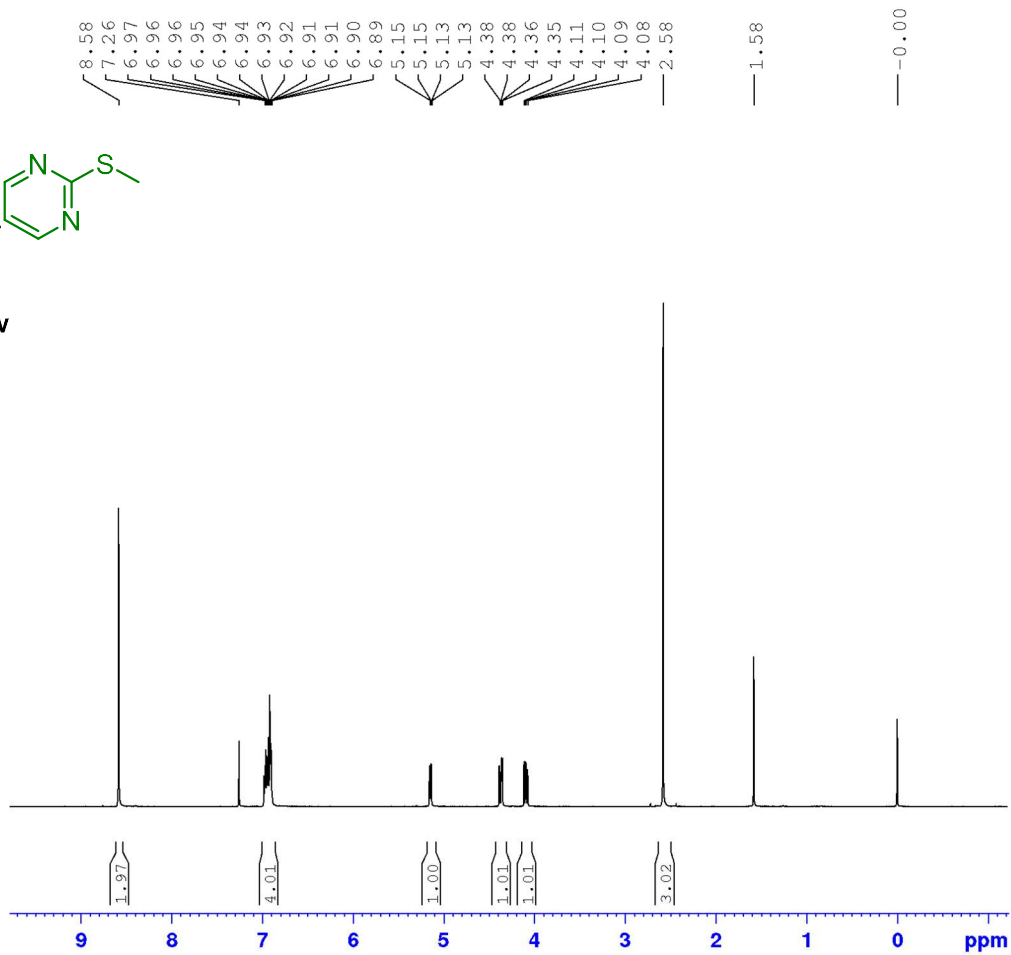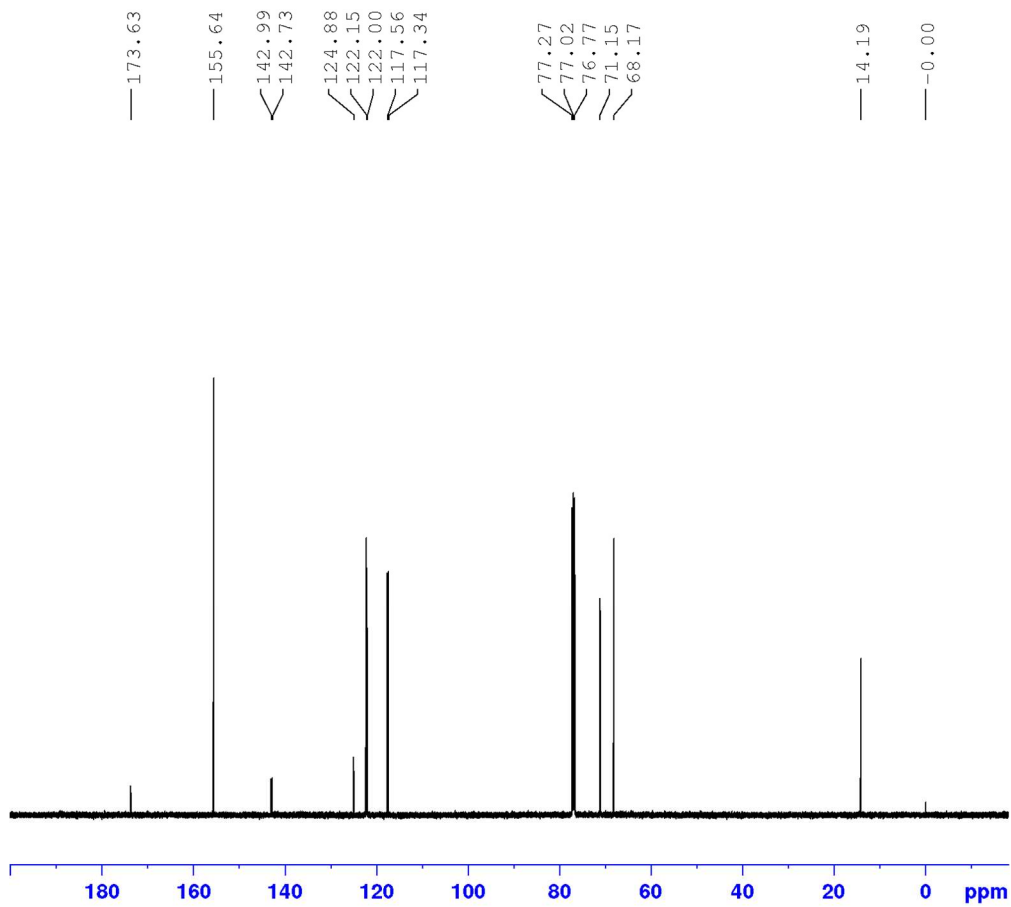

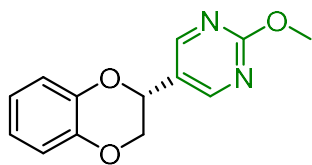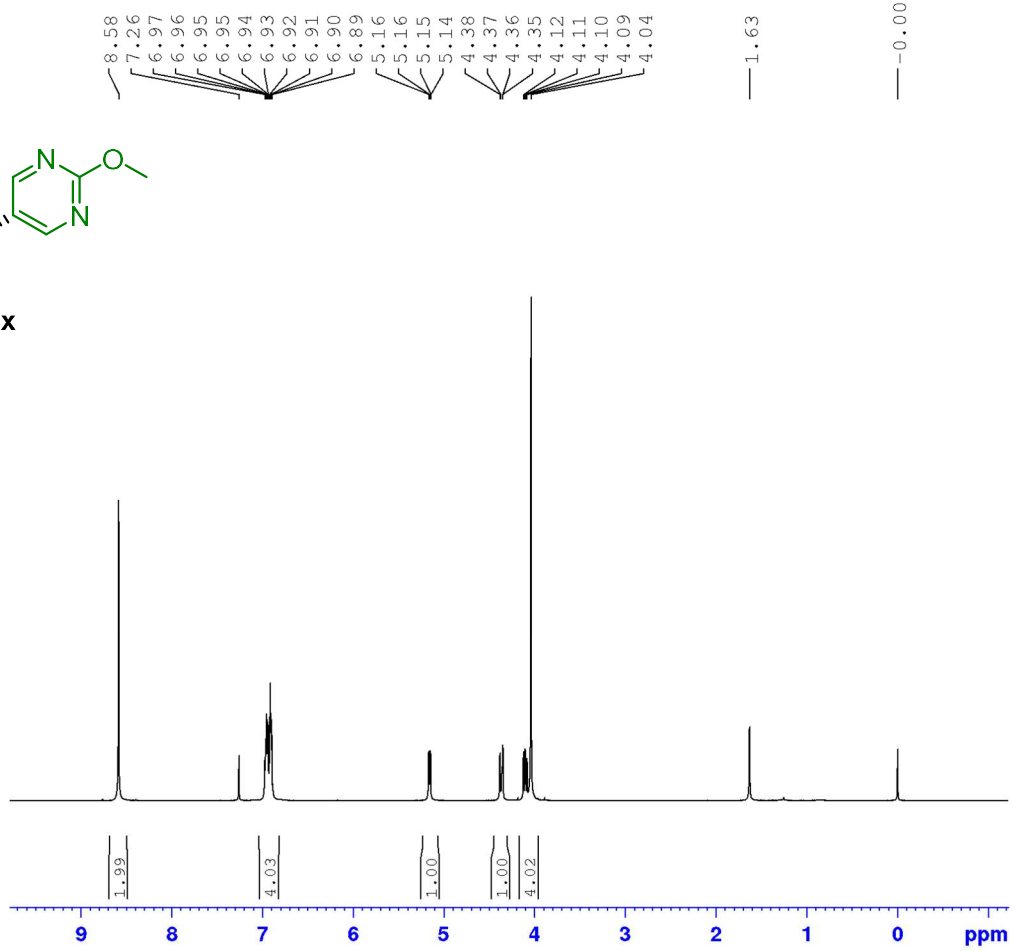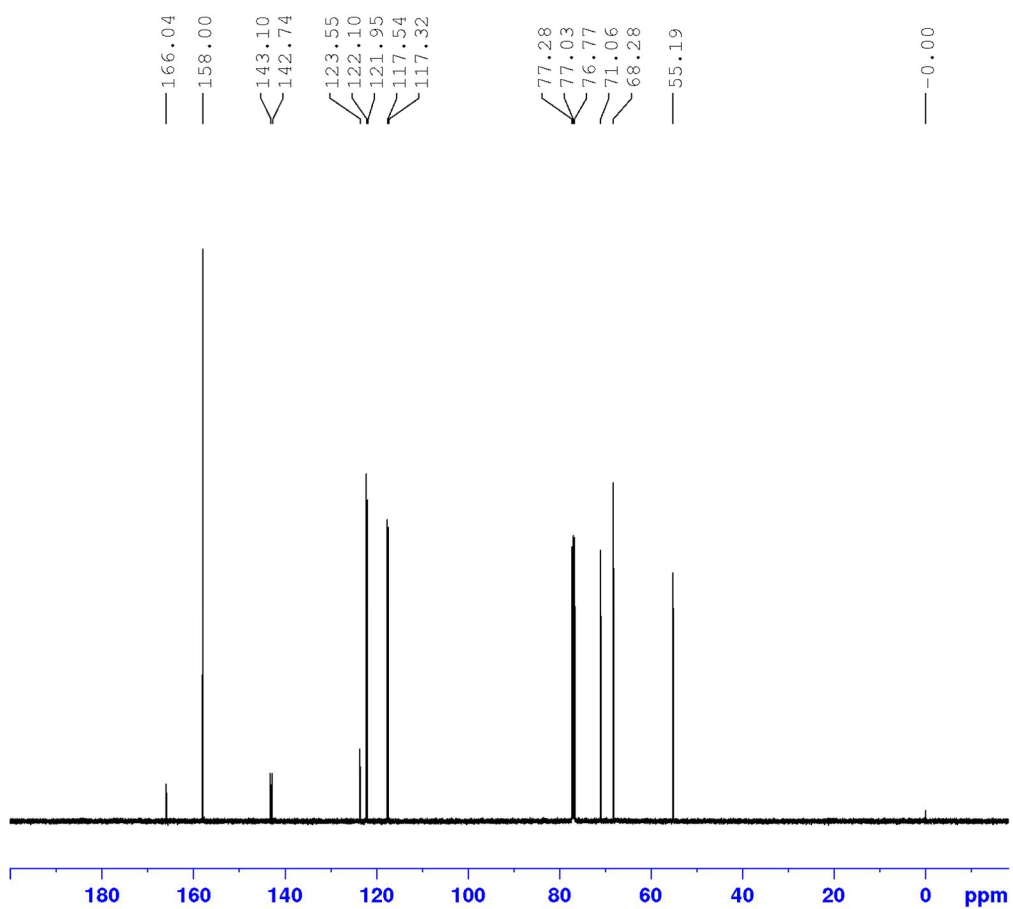

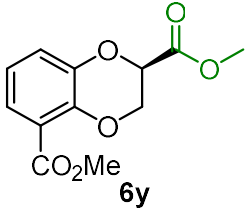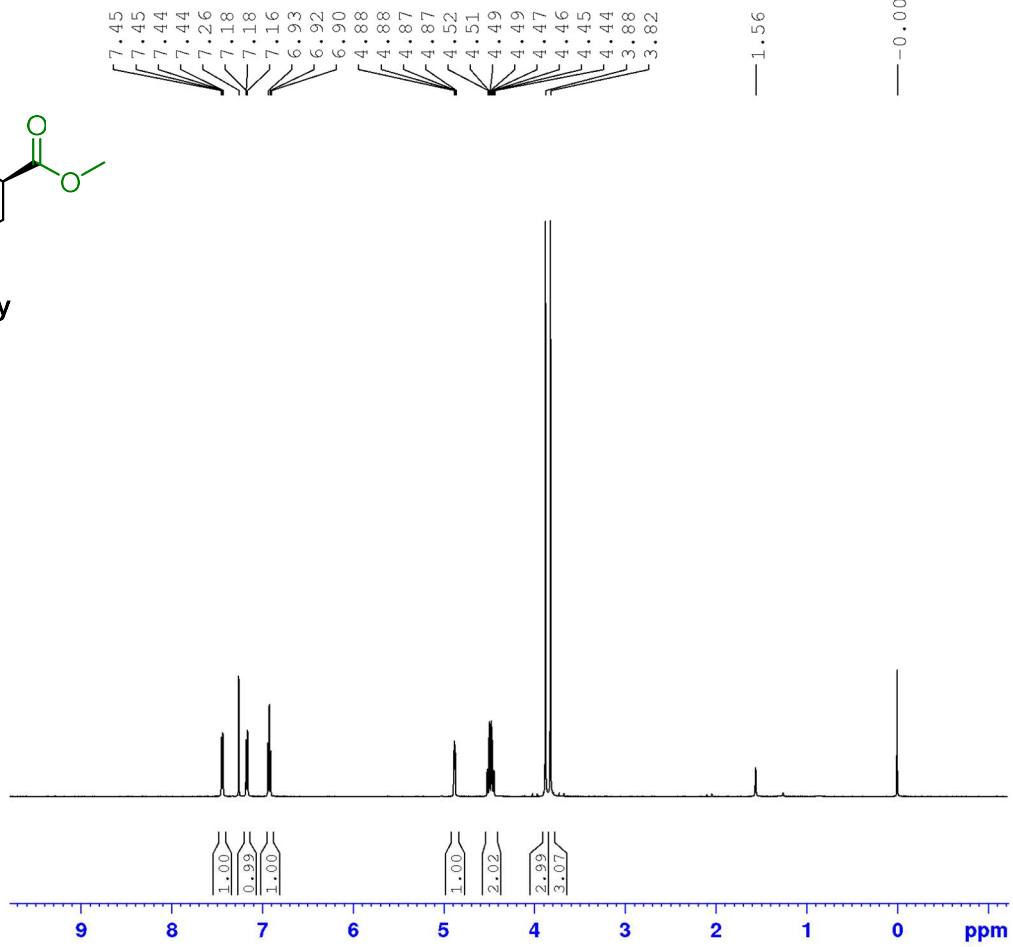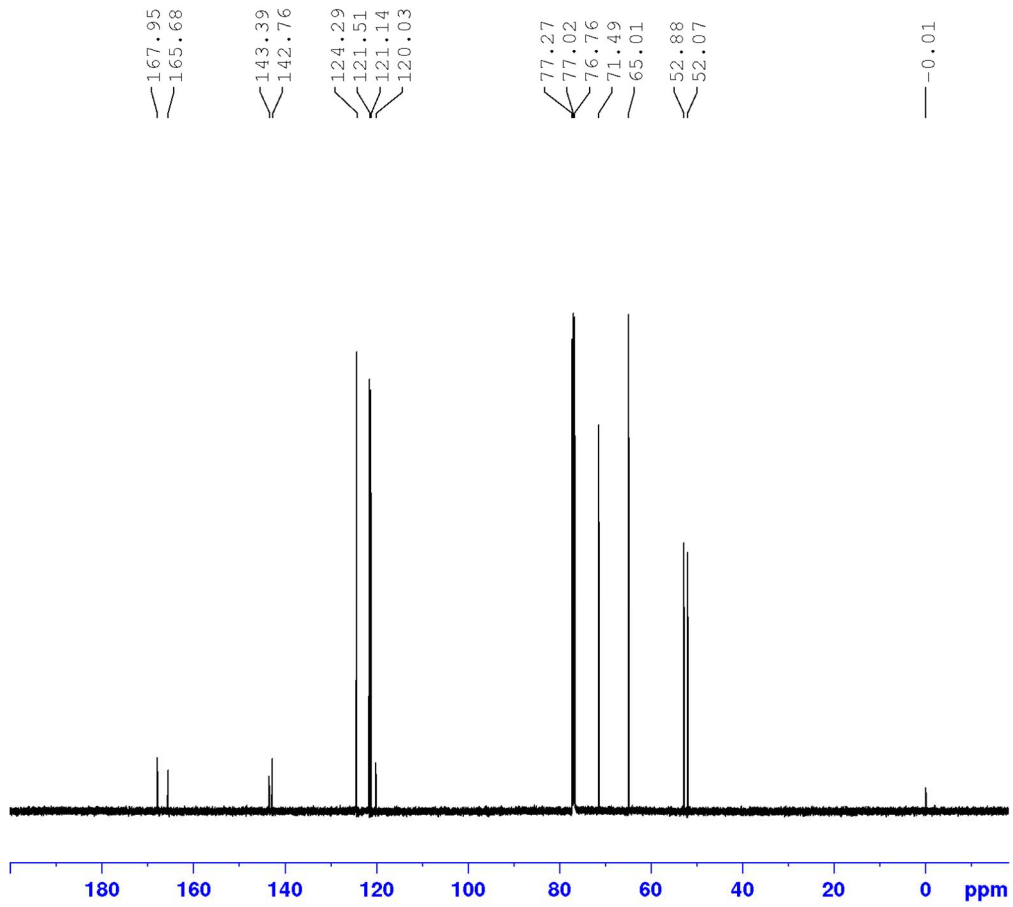

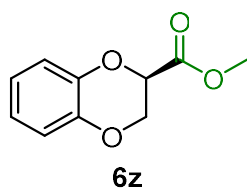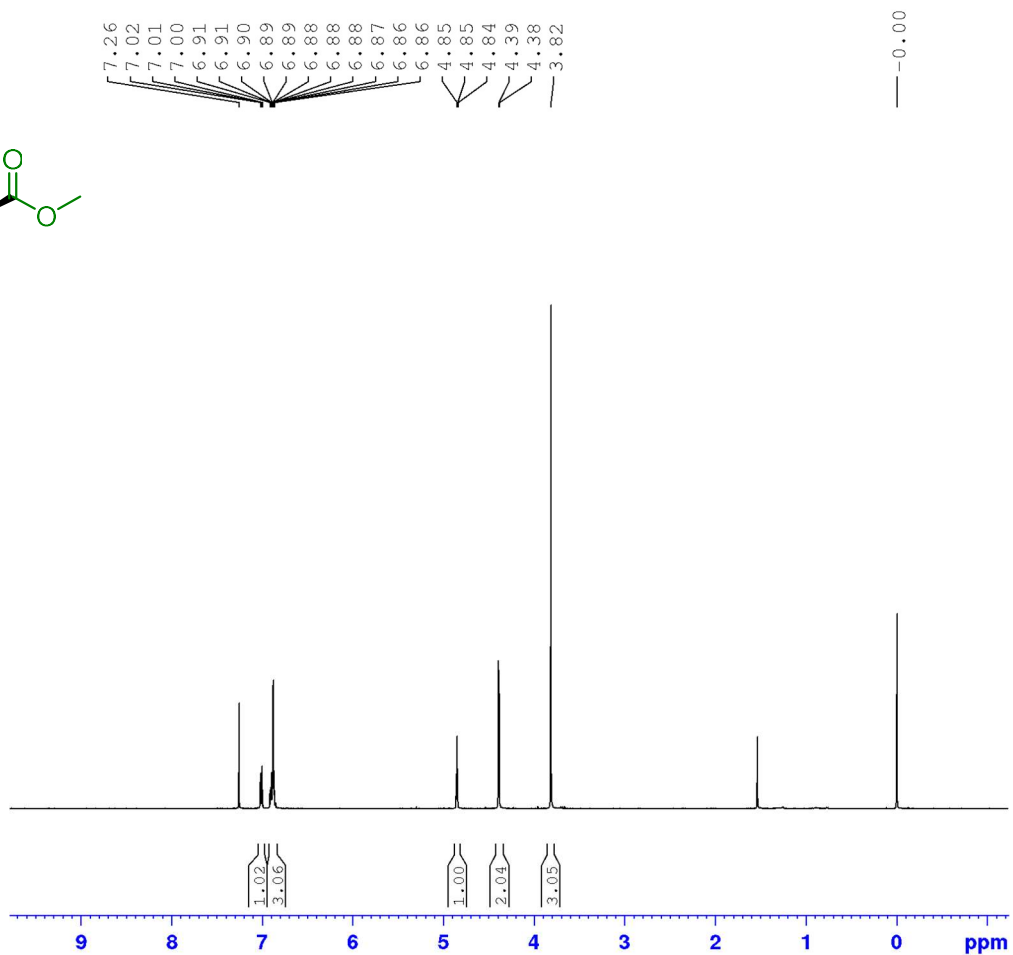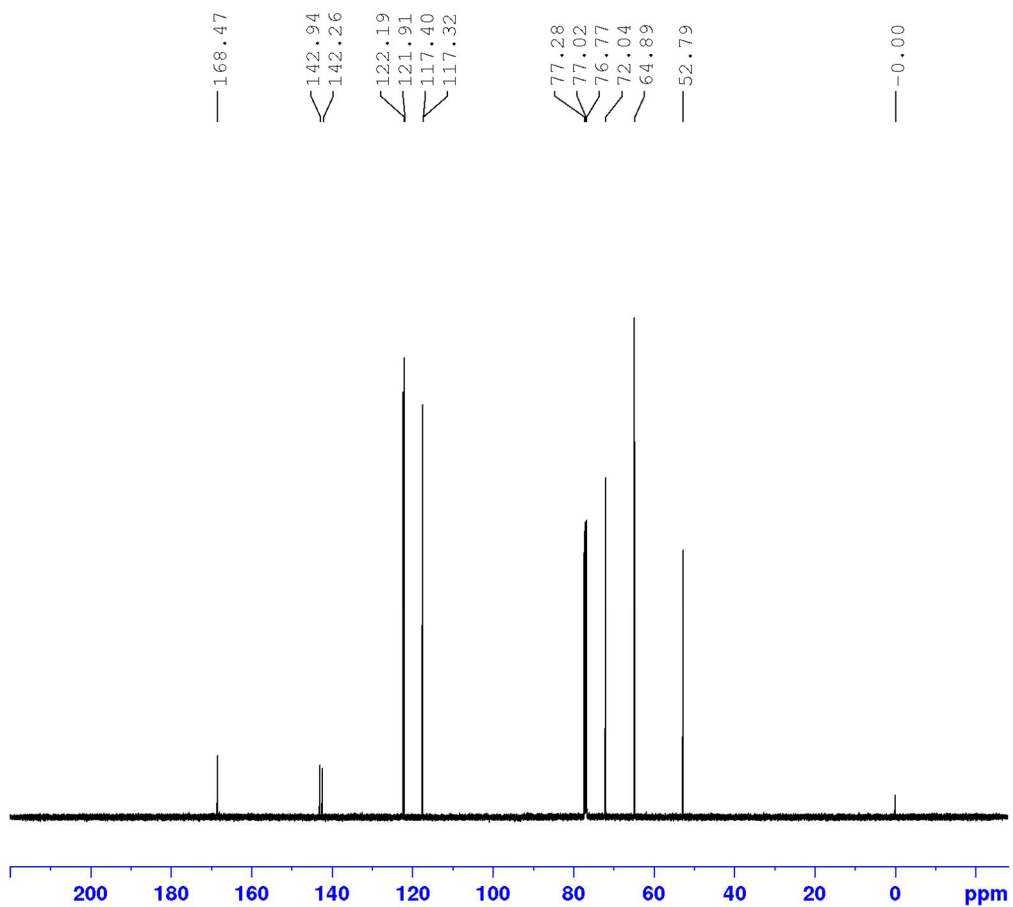

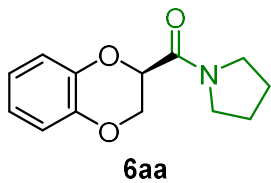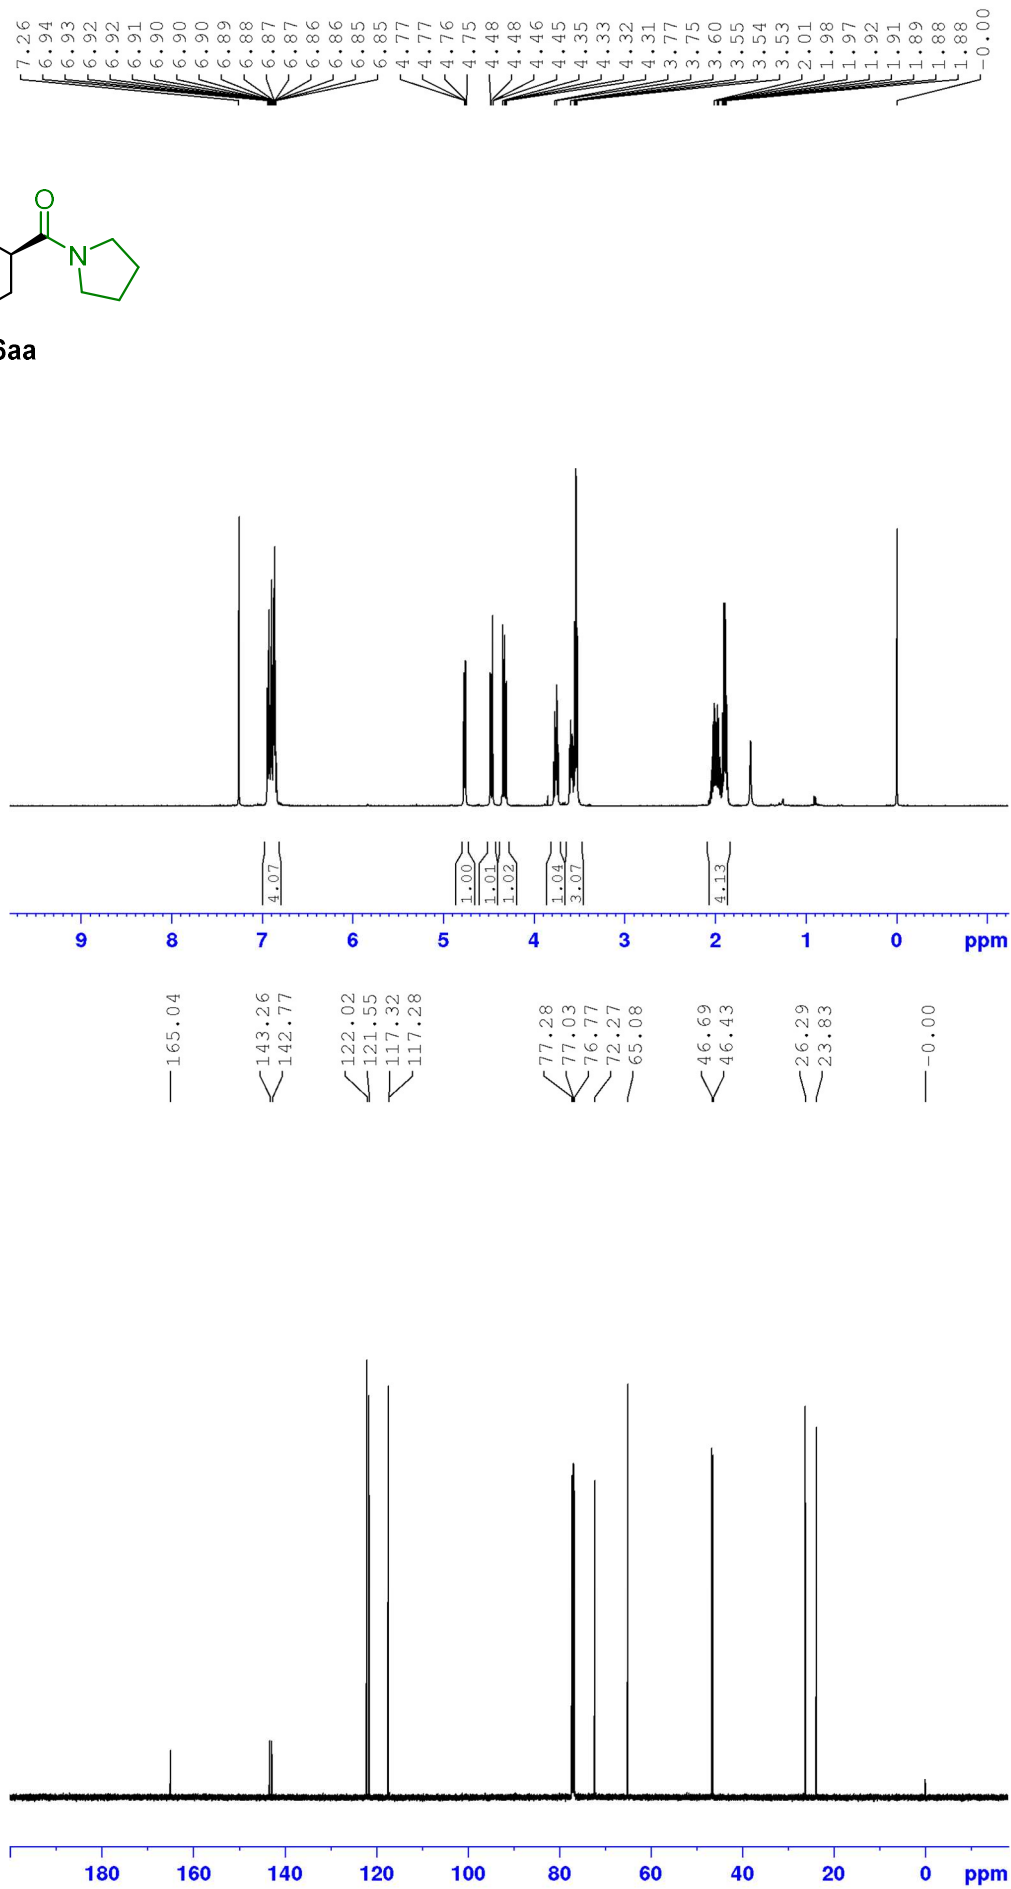

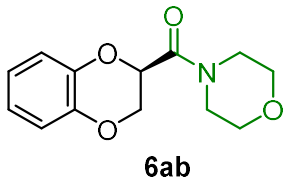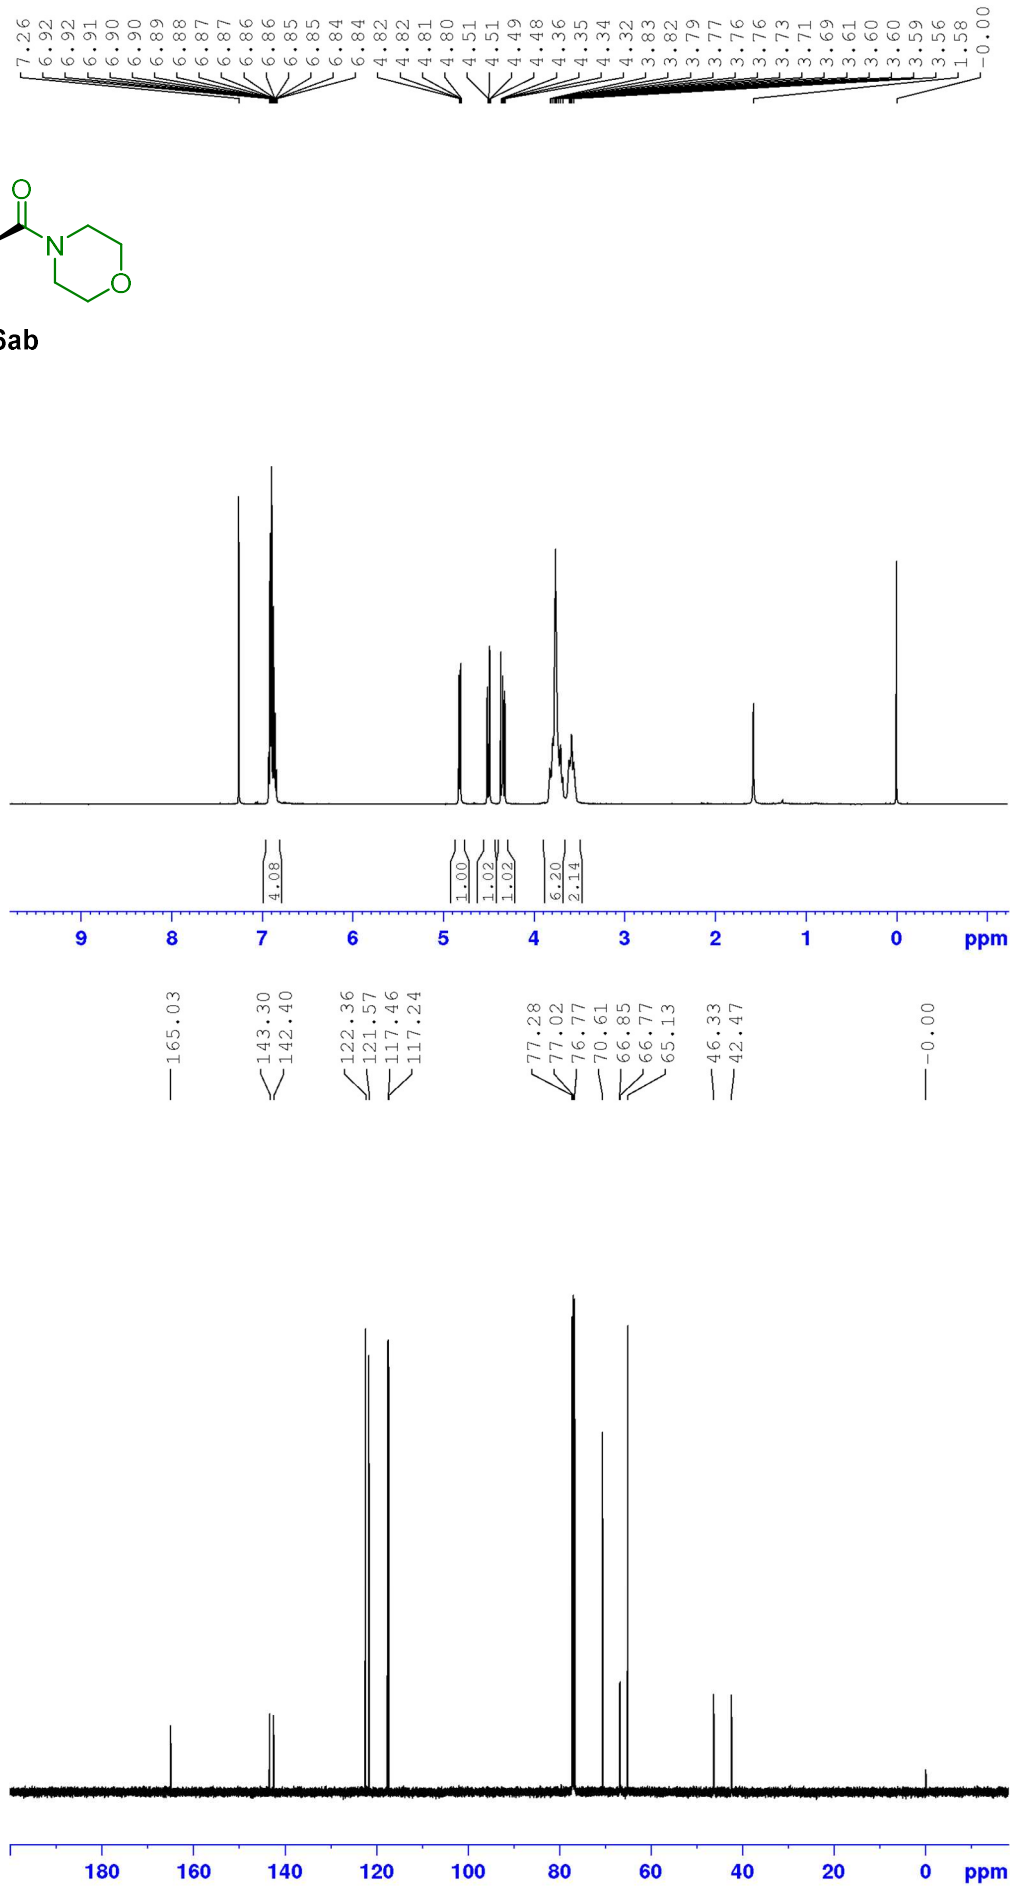

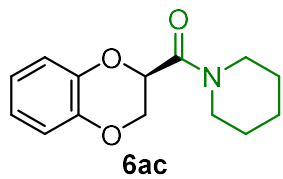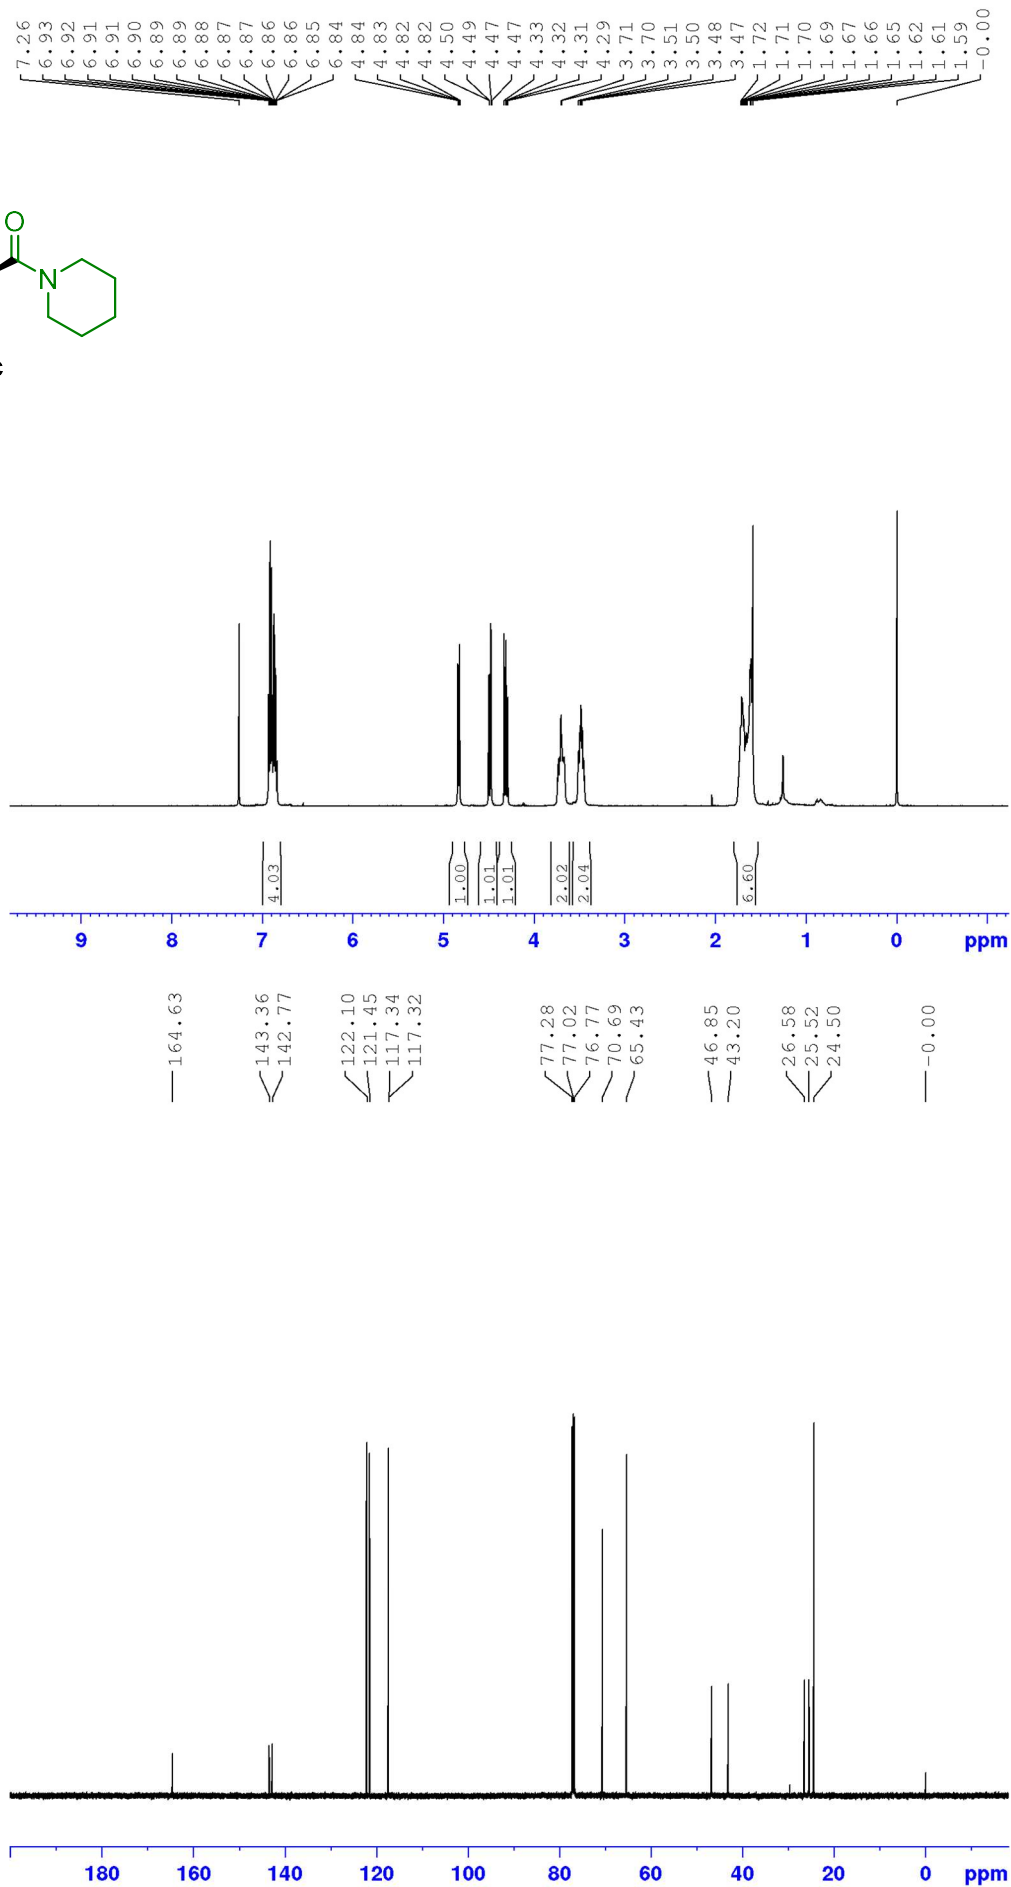

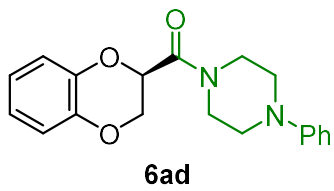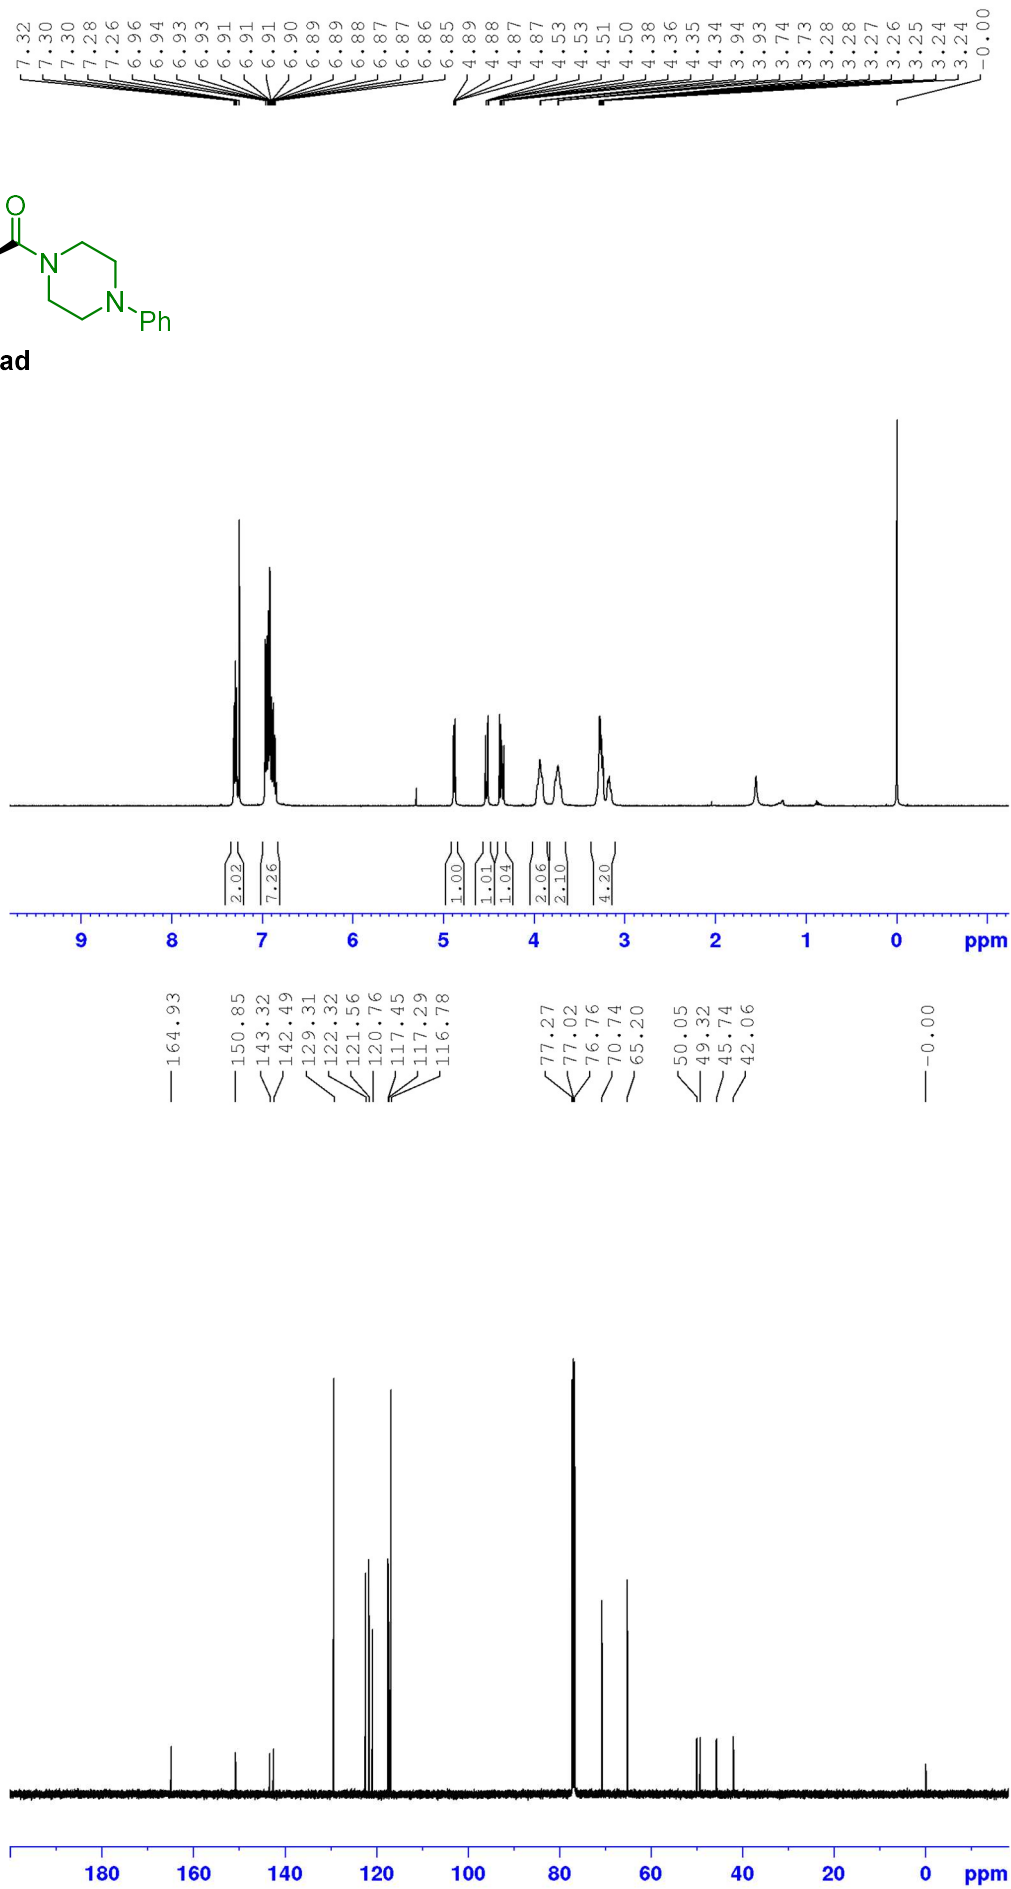



<sup>1</sup>H NMR (300 K)

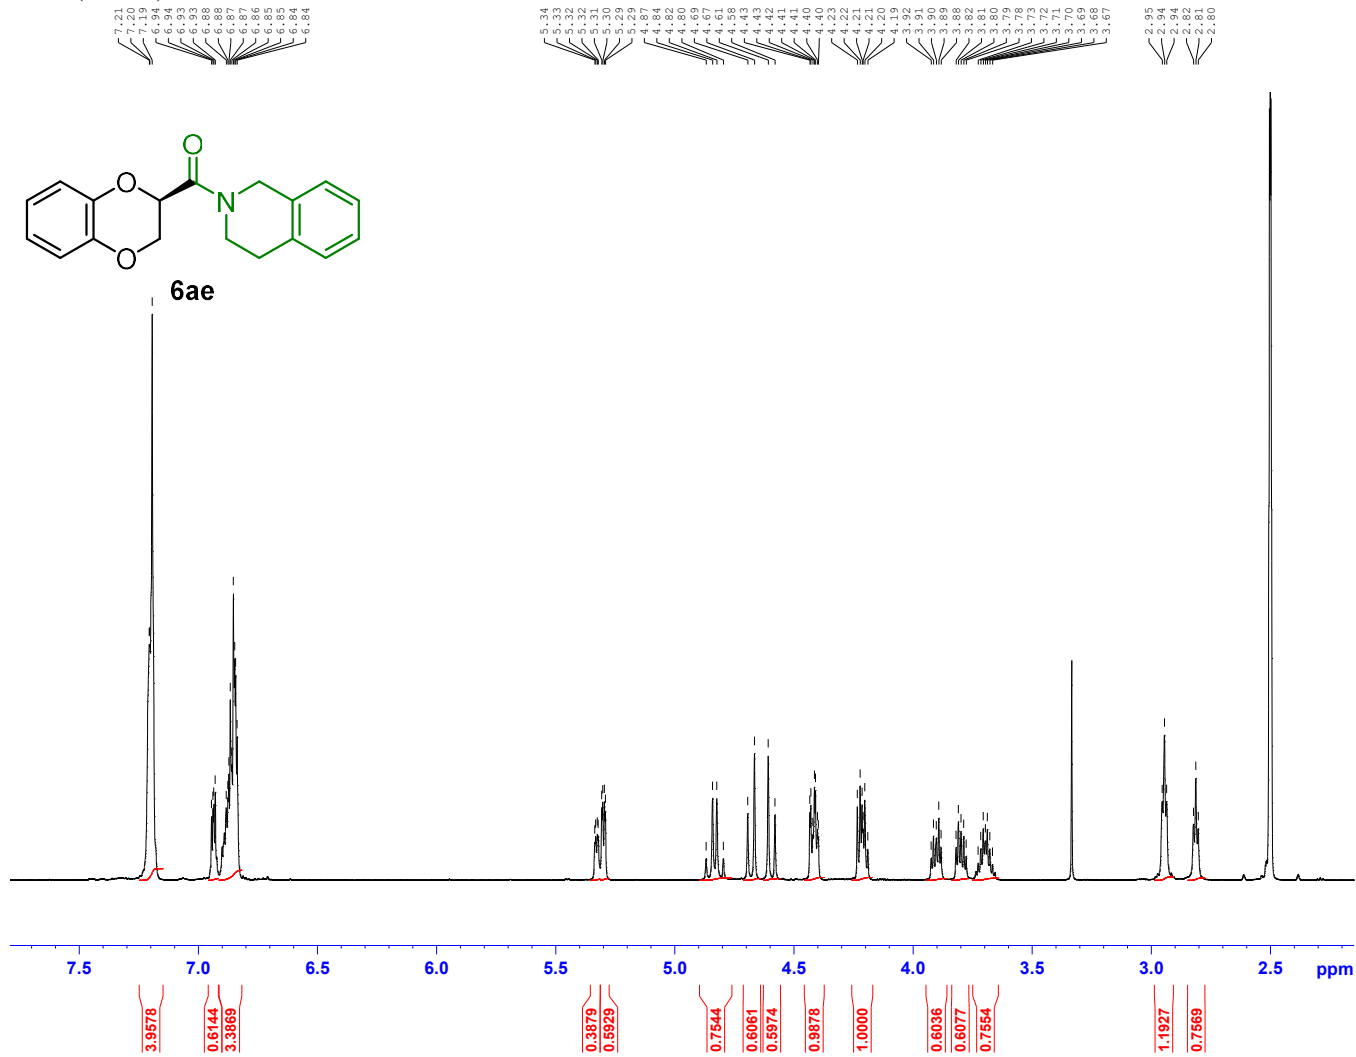

<sup>1</sup>H NMR (350 K)

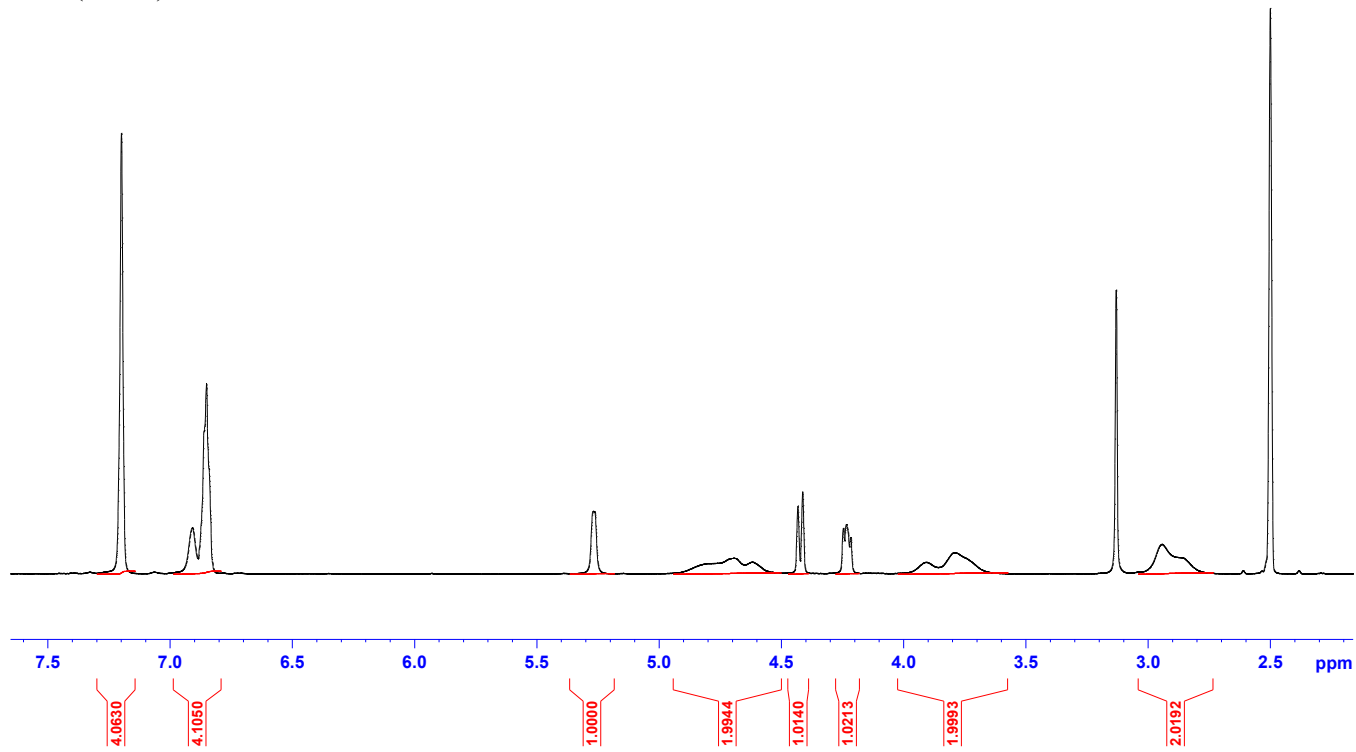

$^{13}\text{C}$  NMR

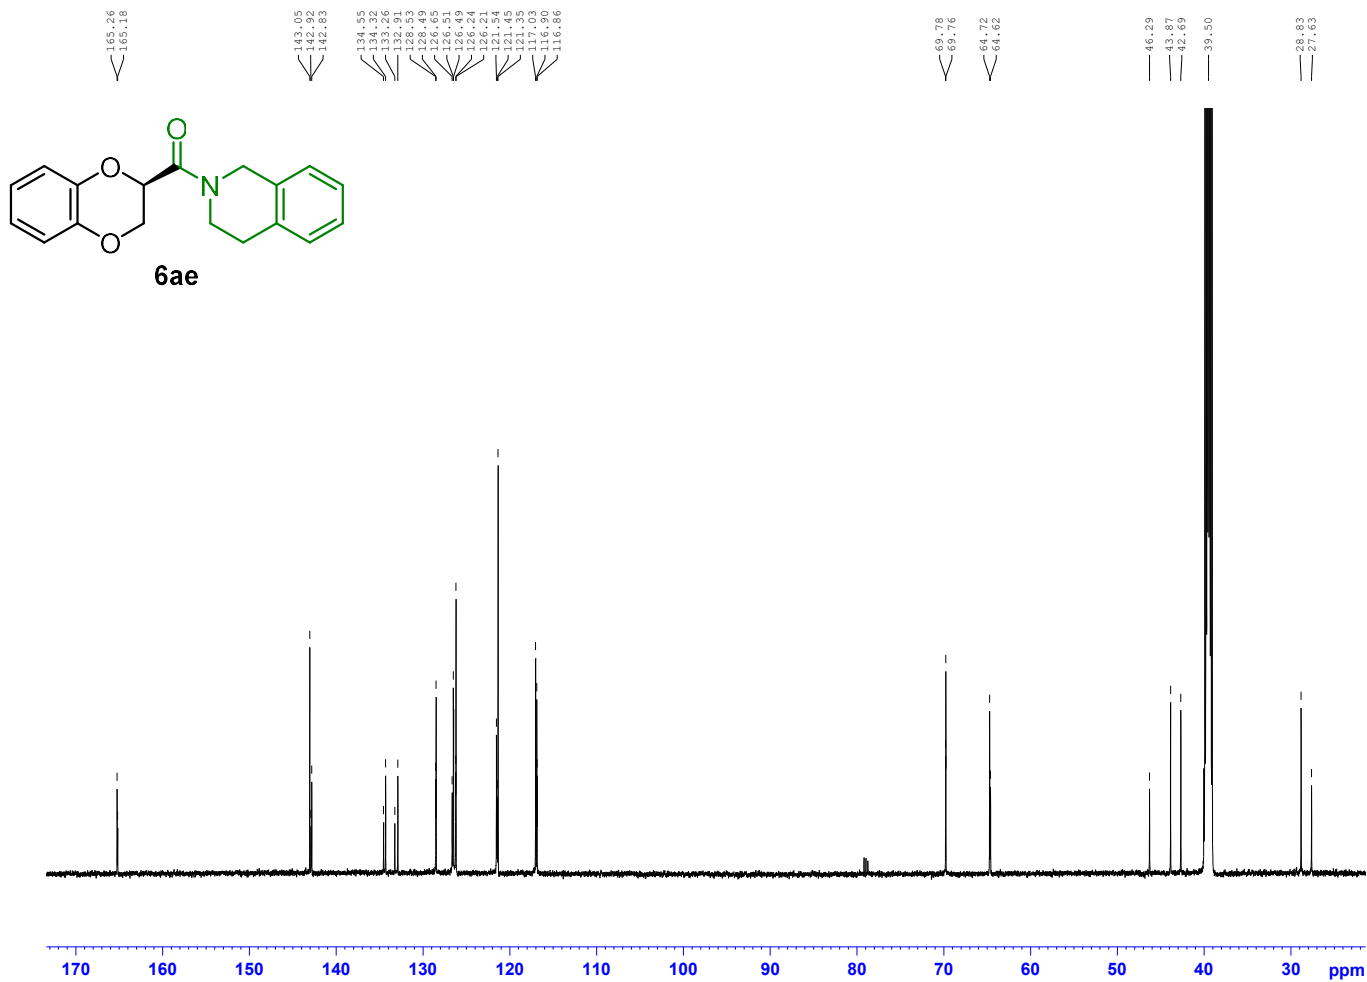

$^1\text{H}$ - $^1\text{H}$  COSY

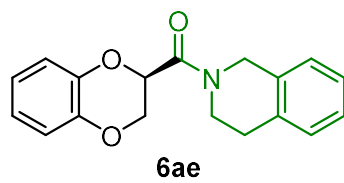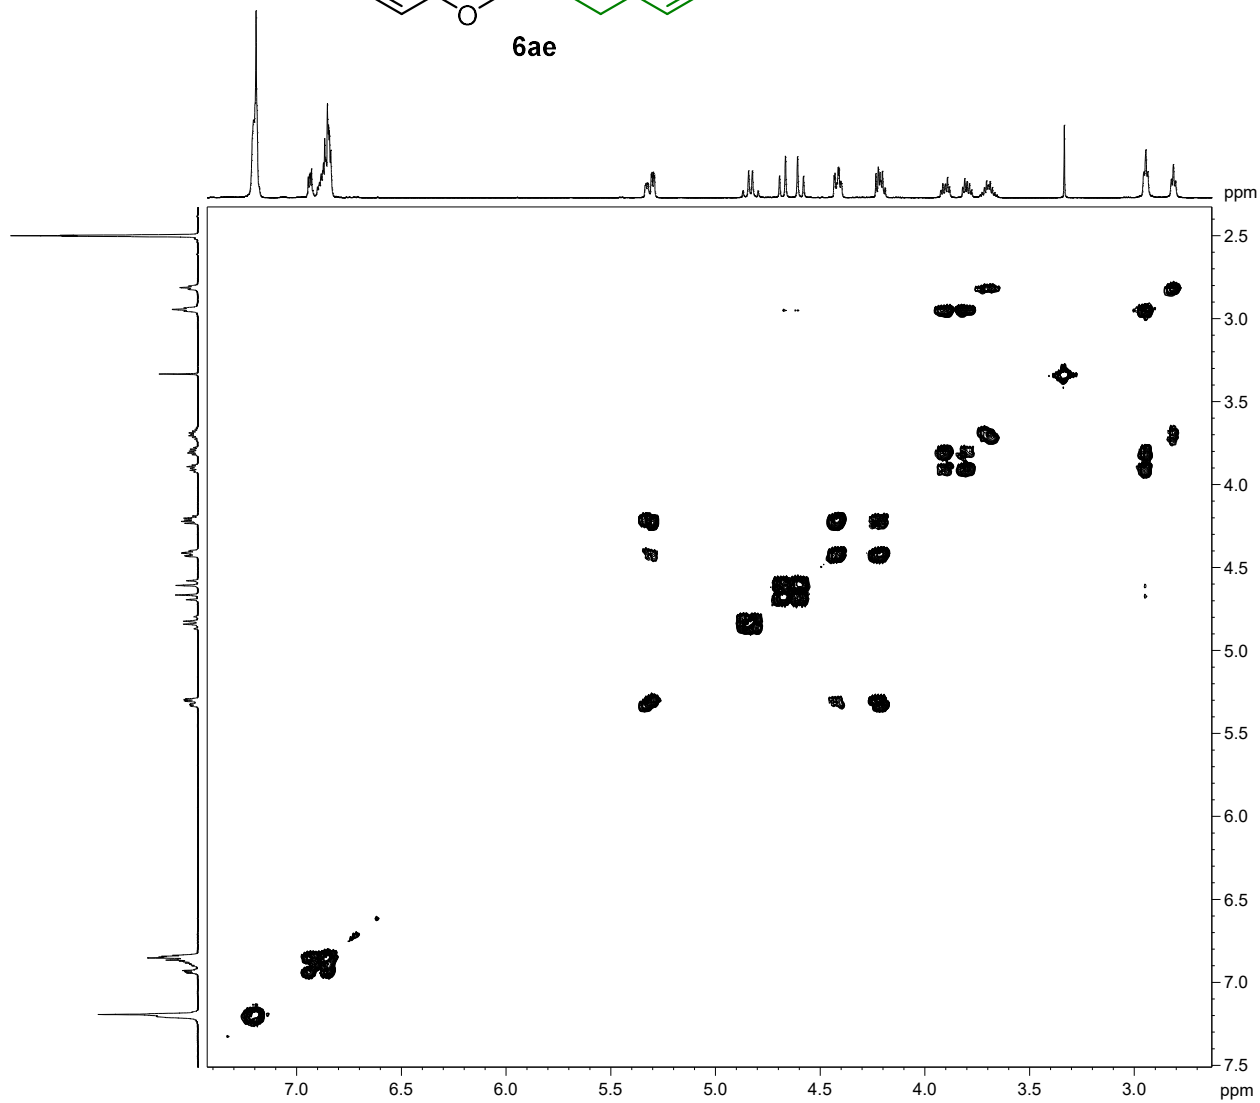

$^1\text{H}$ - $^{13}\text{C}$  HSQC

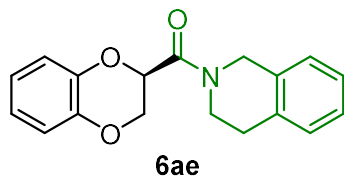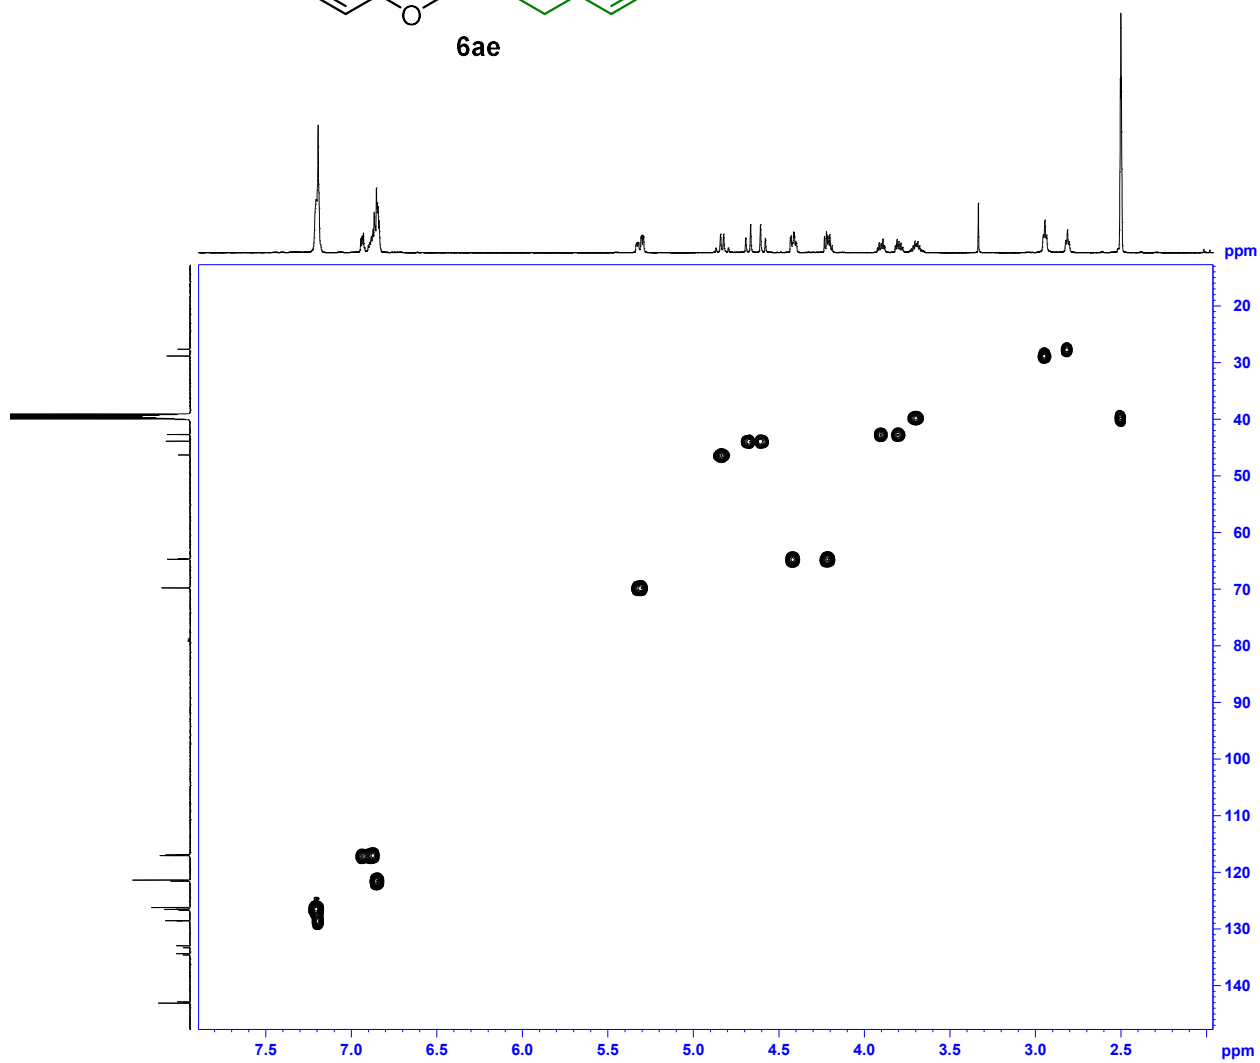

$^1\text{H}$ - $^{13}\text{C}$  HMBC

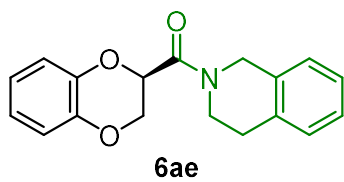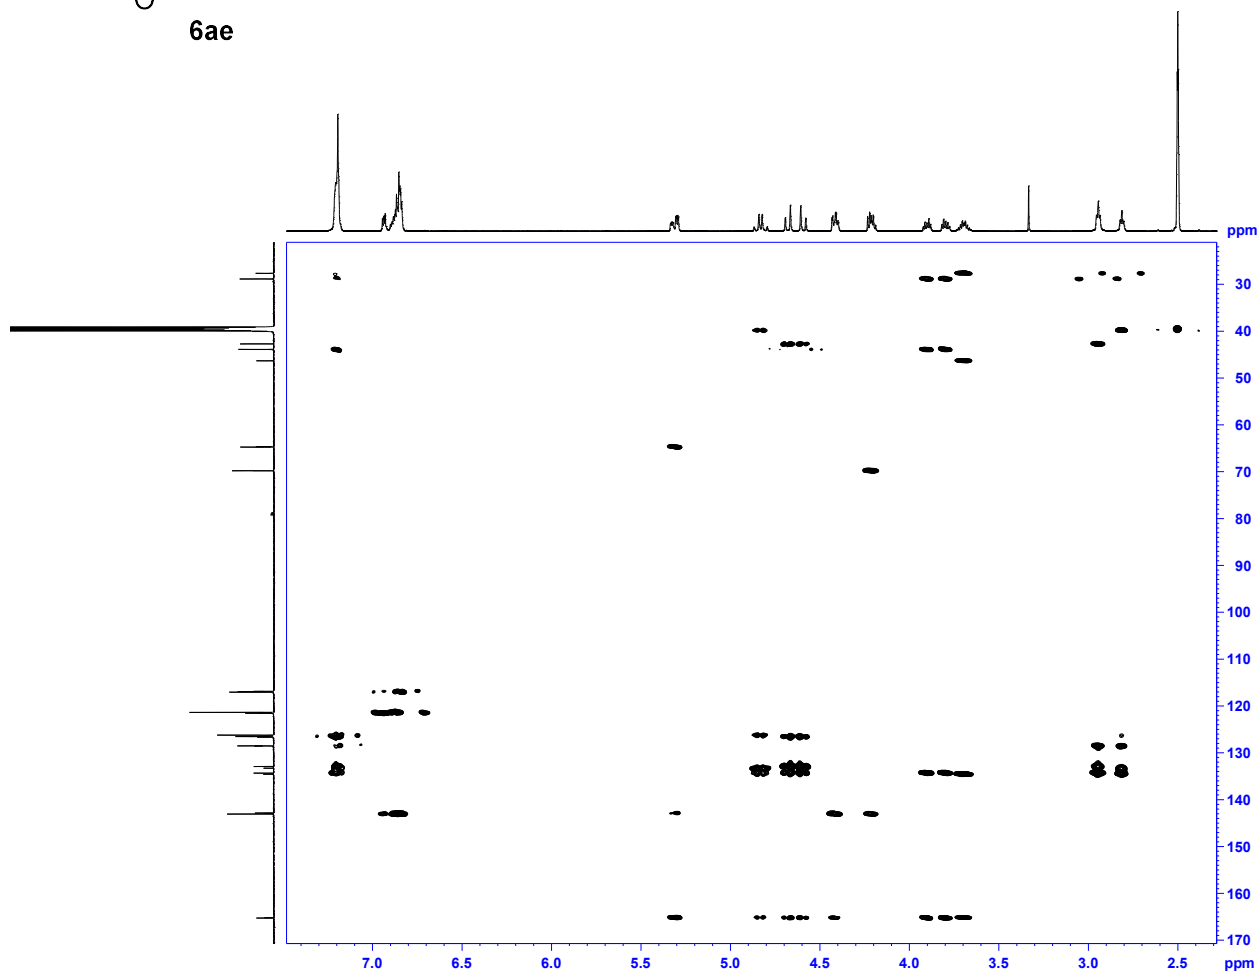

$^1\text{H}$ - $^1\text{H}$  ROESY

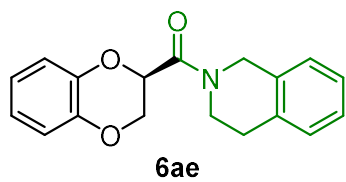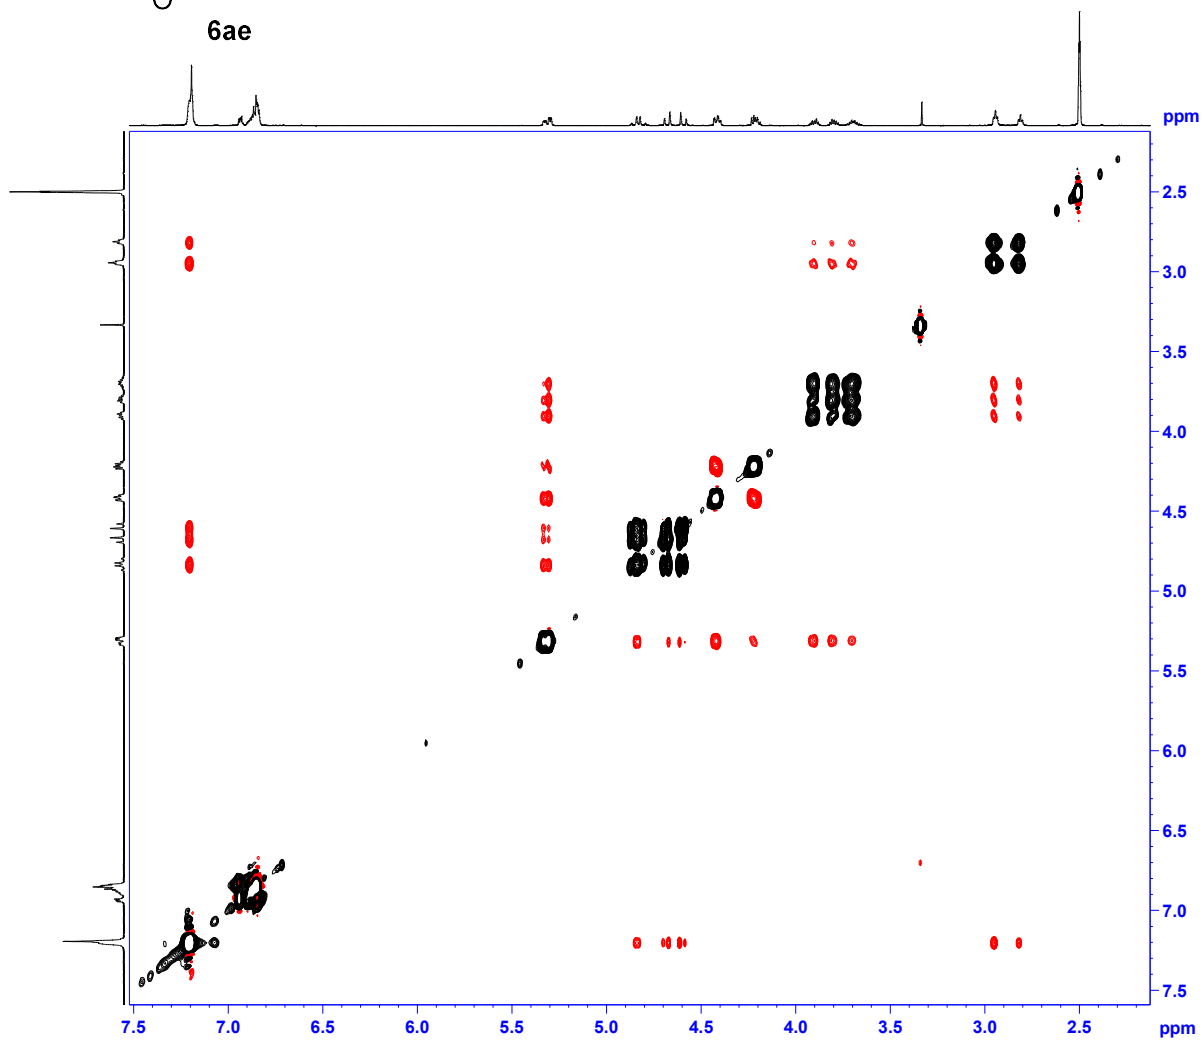

VII. Chiral HPLC/SFC Data

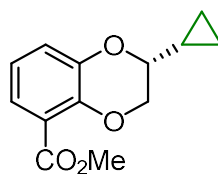

6a

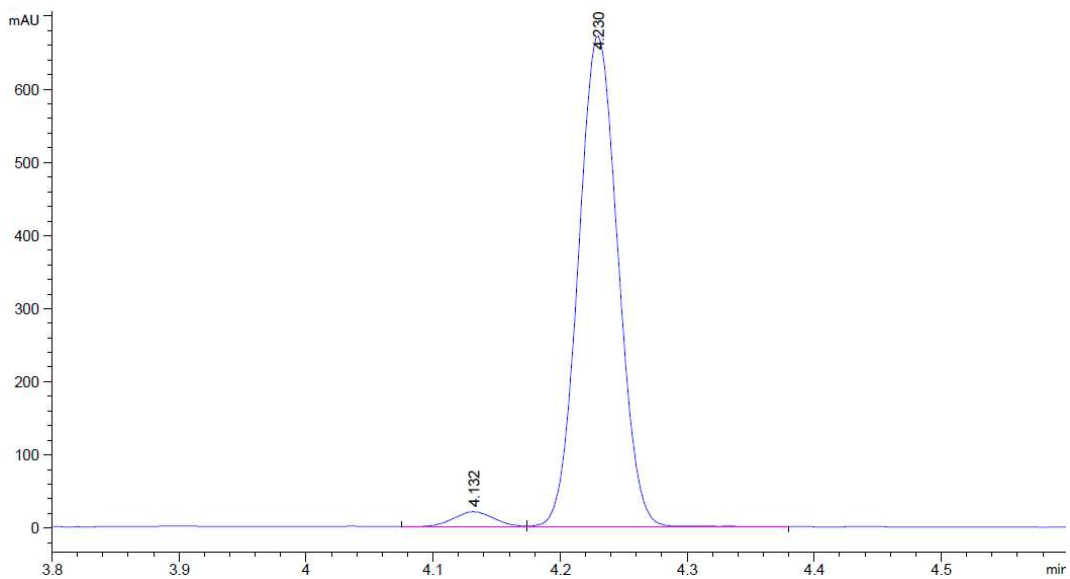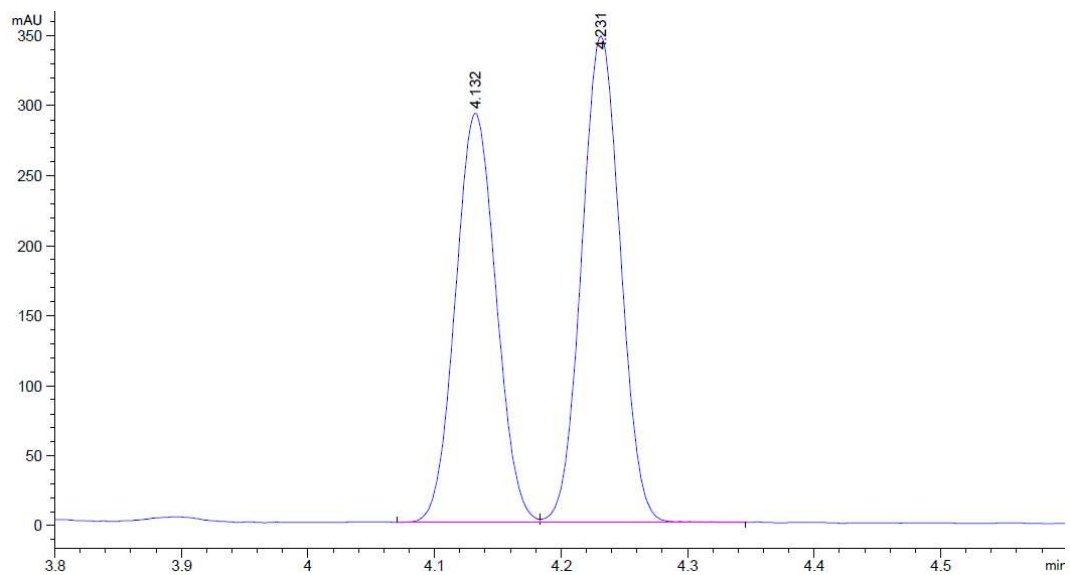

| Peak # | RetTime [min] | Type | Width [min] | Area [mAU*s] | Height [mAU] | Area %  |
|--------|---------------|------|-------------|--------------|--------------|---------|
| 1      | 4.132         | BV   | 0.0342      | 44.74331     | 20.31365     | 2.9985  |
| 2      | 4.230         | VV R | 0.0337      | 1447.44556   | 670.84180    | 97.0015 |

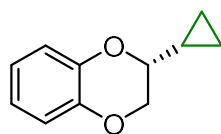

6b

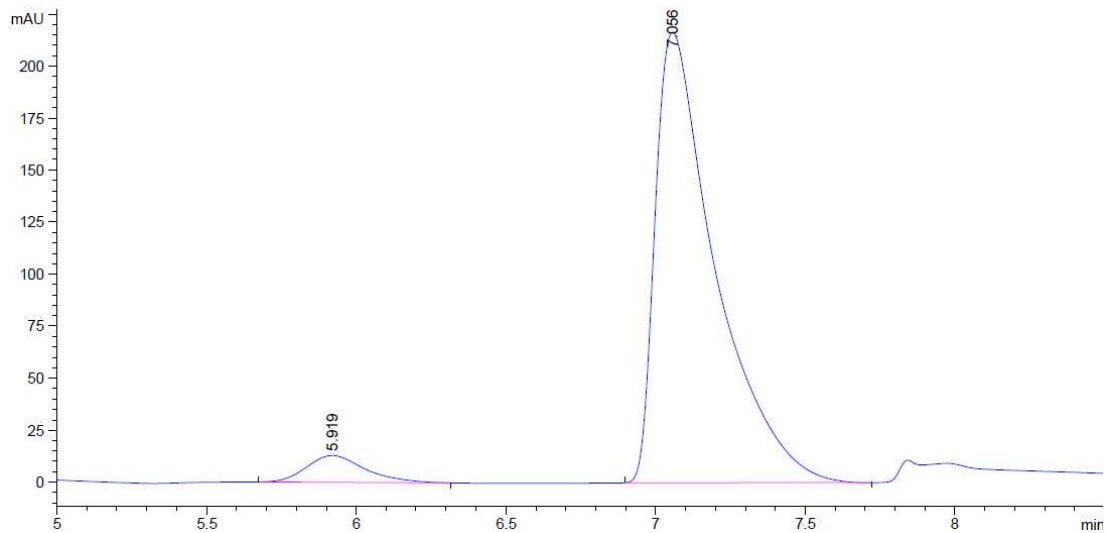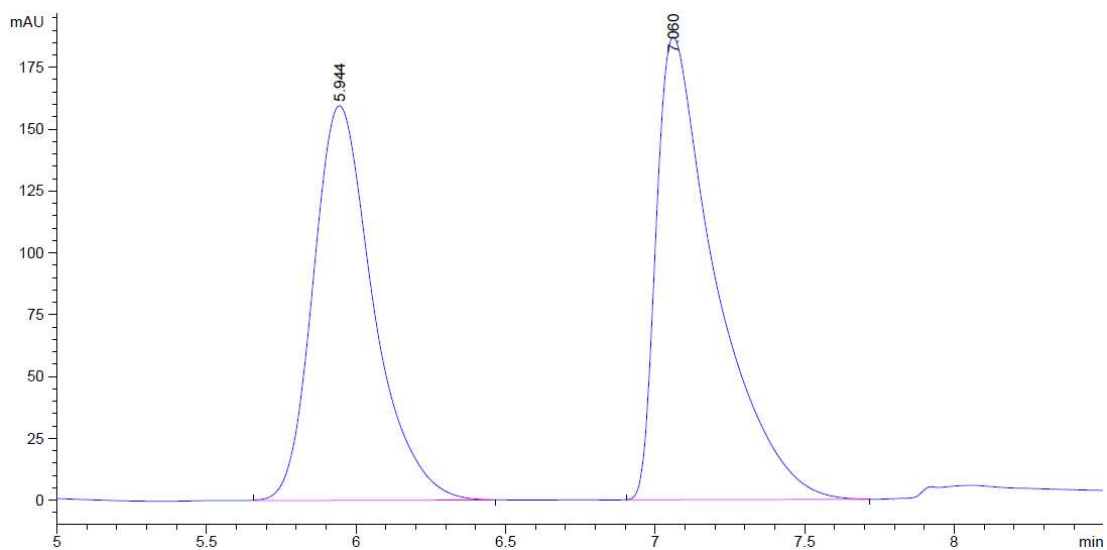

| Peak # | RetTime [min] | Type | Width [min] | Area [mAU*s] | Height [mAU] | Area %  |
|--------|---------------|------|-------------|--------------|--------------|---------|
| 1      | 5.919         | BB   | 0.2117      | 180.68475    | 13.03613     | 5.6383  |
| 2      | 7.056         | BB   | 0.2027      | 3023.92603   | 216.77681    | 94.3617 |



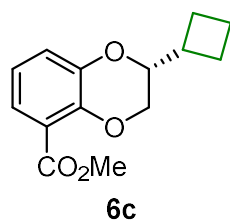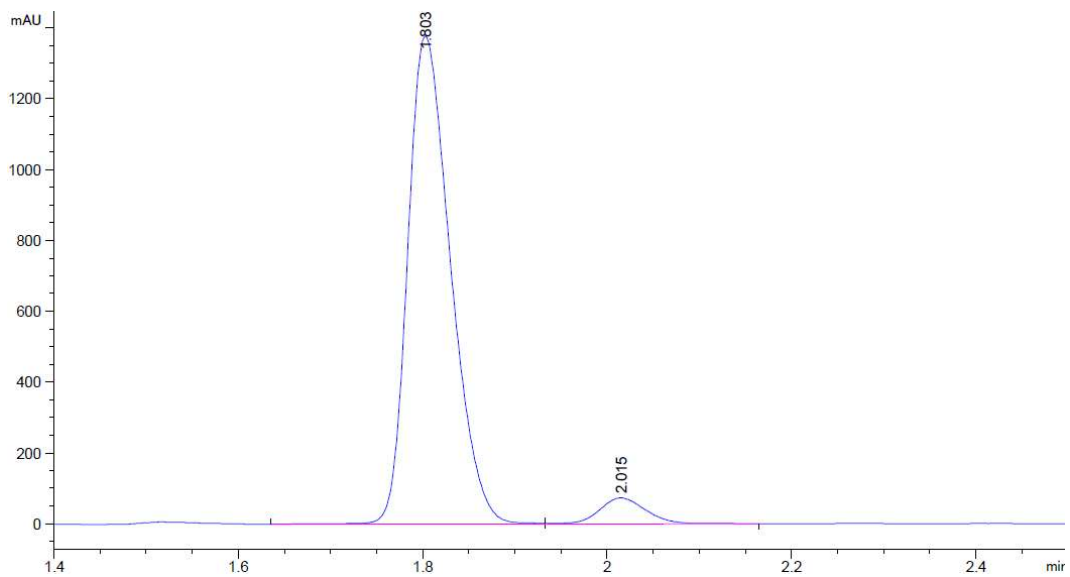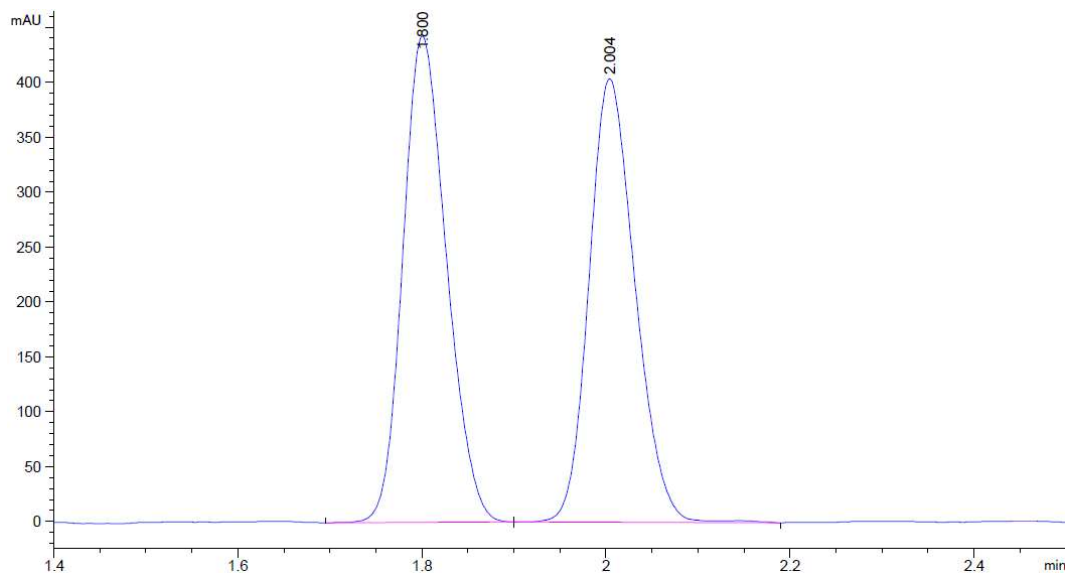

| Peak # | RetTime [min] | Type | Width [min] | Area [mAU*s] | Height [mAU] | Area %  |
|--------|---------------|------|-------------|--------------|--------------|---------|
| 1      | 1.803         | VV R | 0.0495      | 4432.75342   | 1378.77051   | 94.4080 |
| 2      | 2.015         | VV R | 0.0546      | 262.56332    | 73.63523     | 5.5920  |

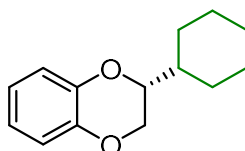

6d

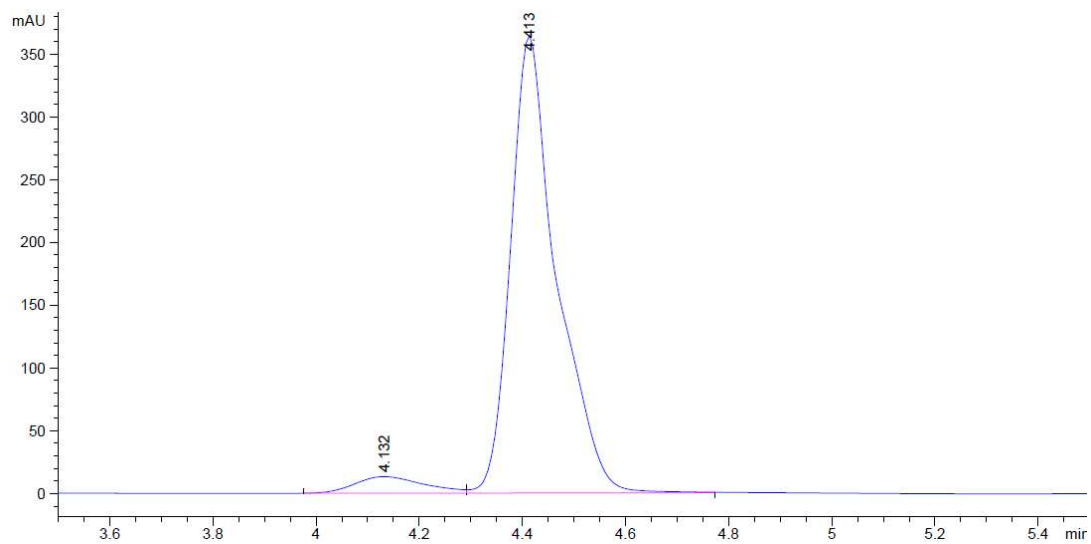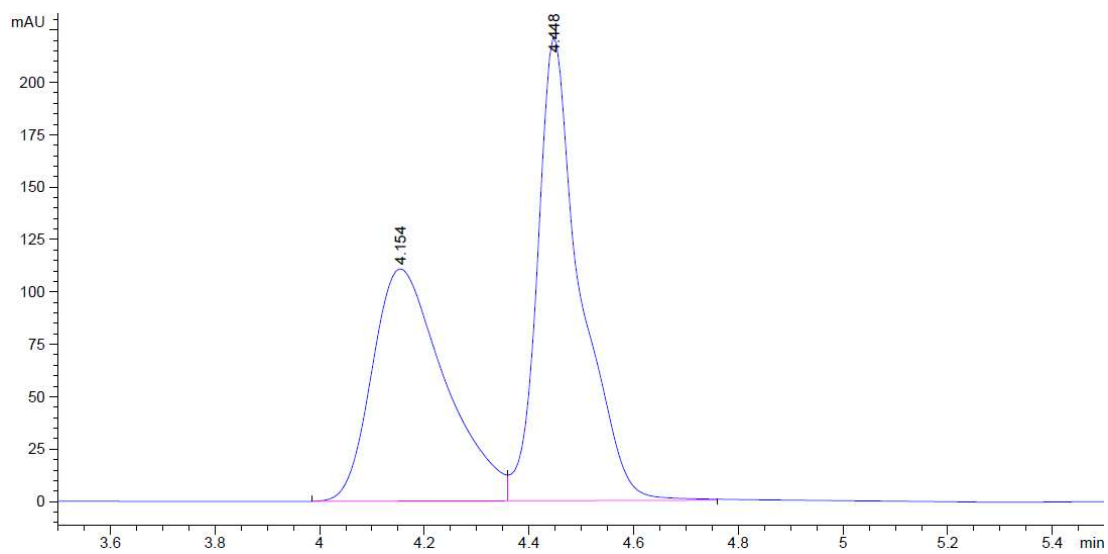

| Peak # | RetTime [min] | Type | Width [min] | Area [mAU*s] | Height [mAU] | Area %  |
|--------|---------------|------|-------------|--------------|--------------|---------|
| 1      | 4.132         | BV   | 0.1401      | 121.99075    | 13.16288     | 5.1110  |
| 2      | 4.413         | VB   | 0.0885      | 2264.85010   | 364.51703    | 94.8890 |

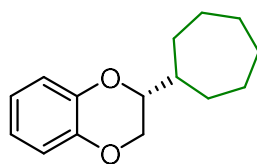

**6e**

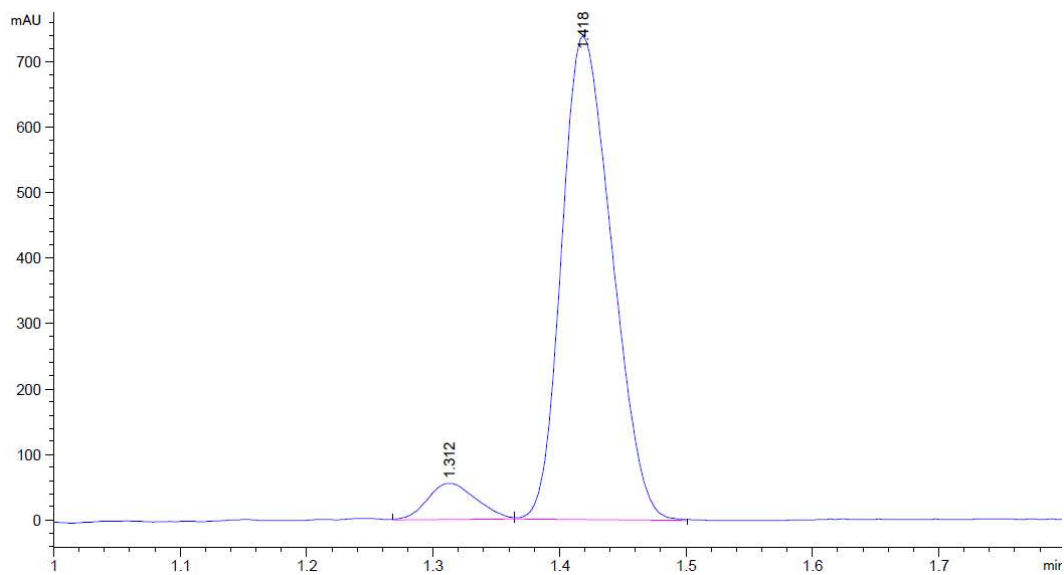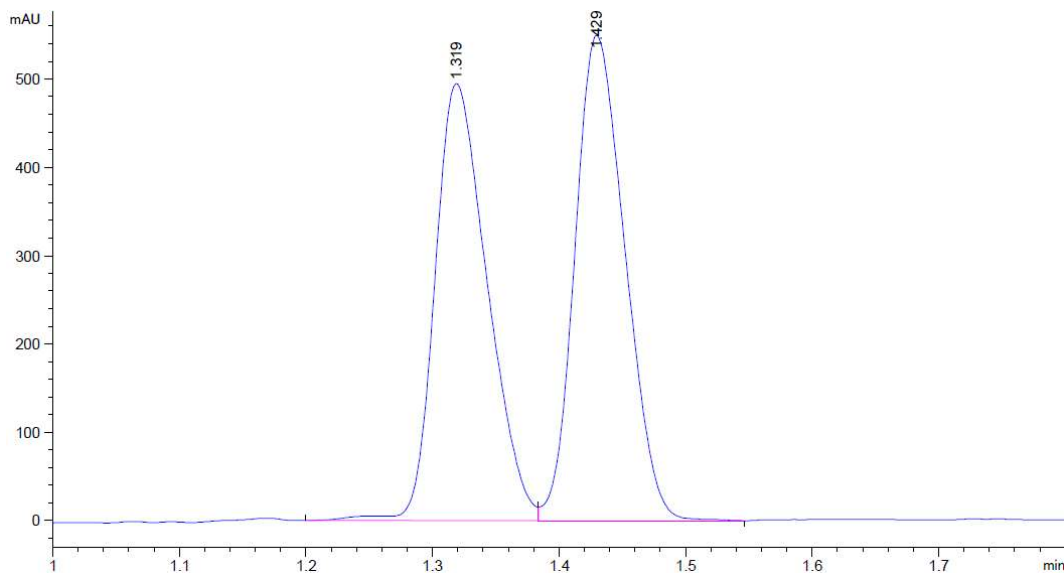

| Peak # | RetTime [min] | Type | Width [min] | Area [mAU*s] | Height [mAU] | Area %  |
|--------|---------------|------|-------------|--------------|--------------|---------|
| 1      | 1.312         | MM   | 0.0445      | 148.10214    | 55.41978     | 6.7733  |
| 2      | 1.418         | MM   | 0.0460      | 2038.46729   | 738.60114    | 93.2267 |

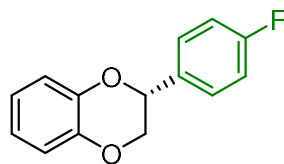

6f

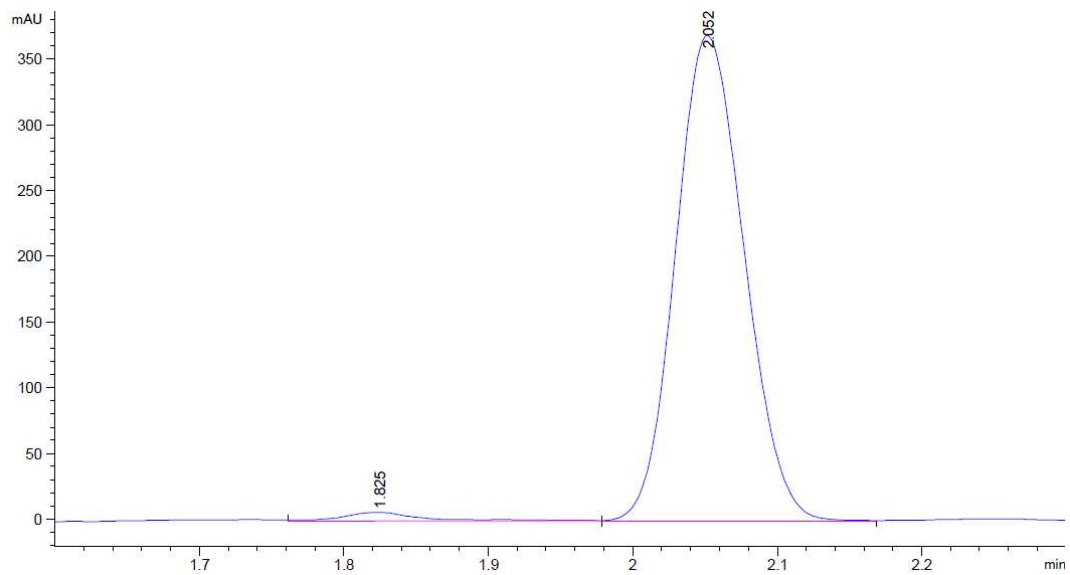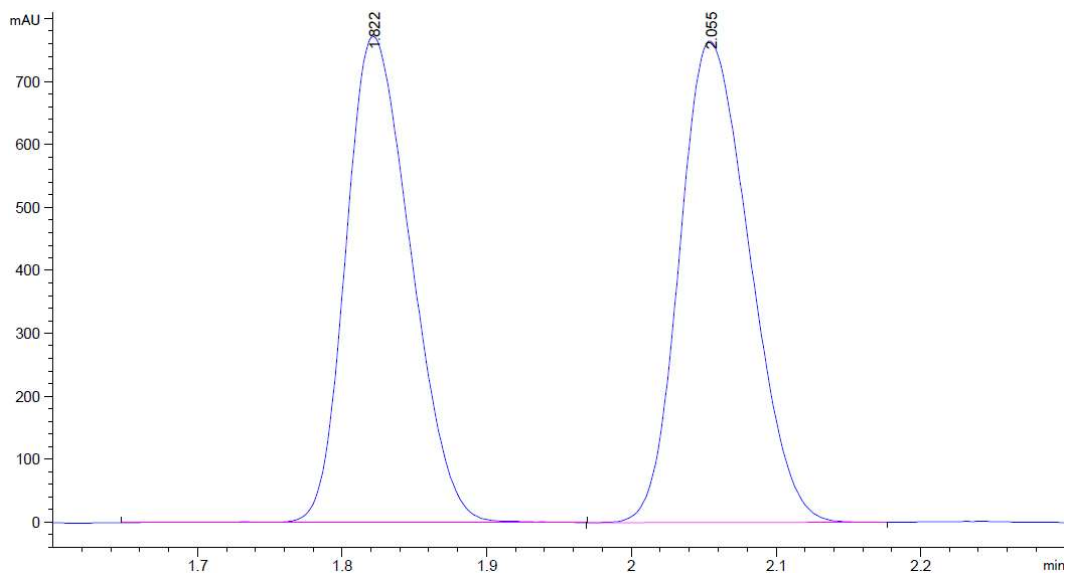

| Peak # | RetTime [min] | Type | Width [min] | Area [mAU*s] | Height [mAU] | Area %  |
|--------|---------------|------|-------------|--------------|--------------|---------|
| 1      | 1.825         | VV R | 0.0558      | 26.18029     | 6.66611      | 2.1089  |
| 2      | 2.052         | BV R | 0.0514      | 1215.23779   | 369.34103    | 97.8911 |

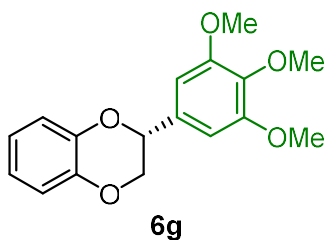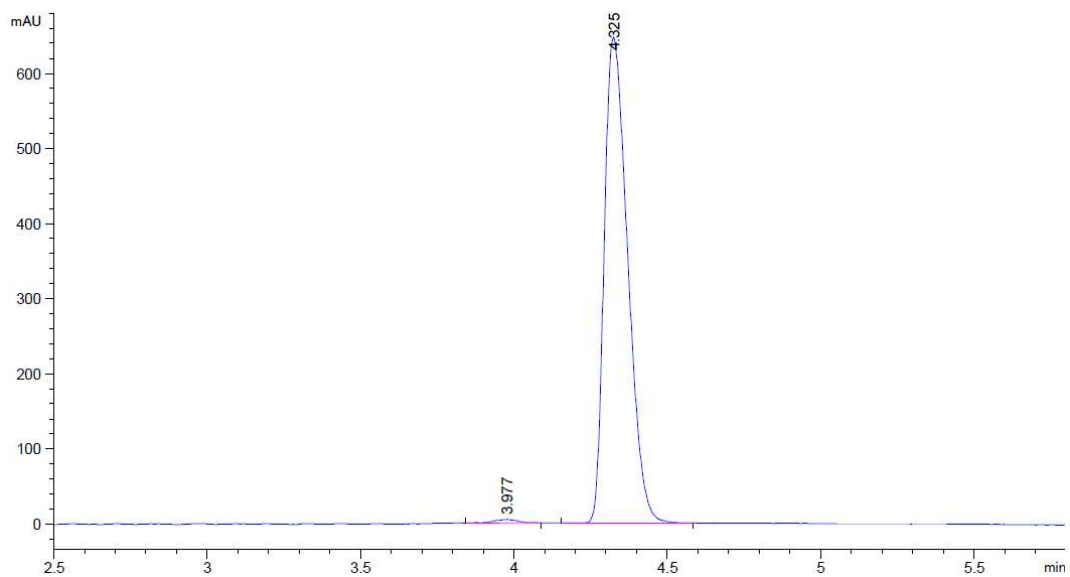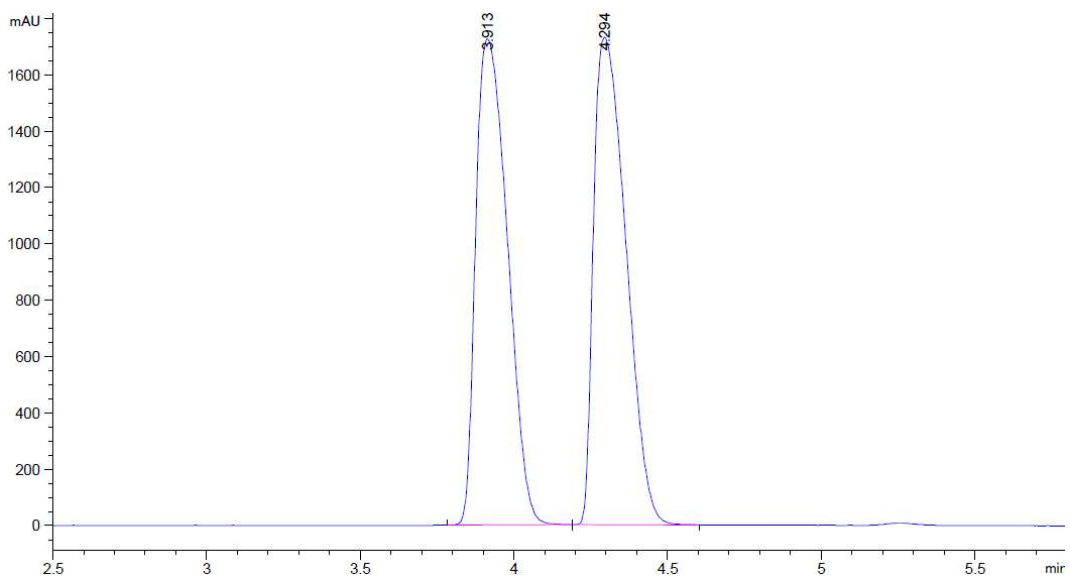

| Peak # | RetTime [min] | Type | Width [min] | Area [mAU*s] | Height [mAU] | Area %  |
|--------|---------------|------|-------------|--------------|--------------|---------|
| 1      | 3.977         | VV R | 0.0690      | 27.32773     | 4.94515      | 0.7906  |
| 2      | 4.325         | VV R | 0.0838      | 3429.44873   | 646.94293    | 99.2094 |

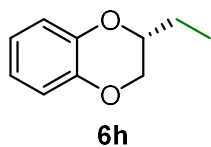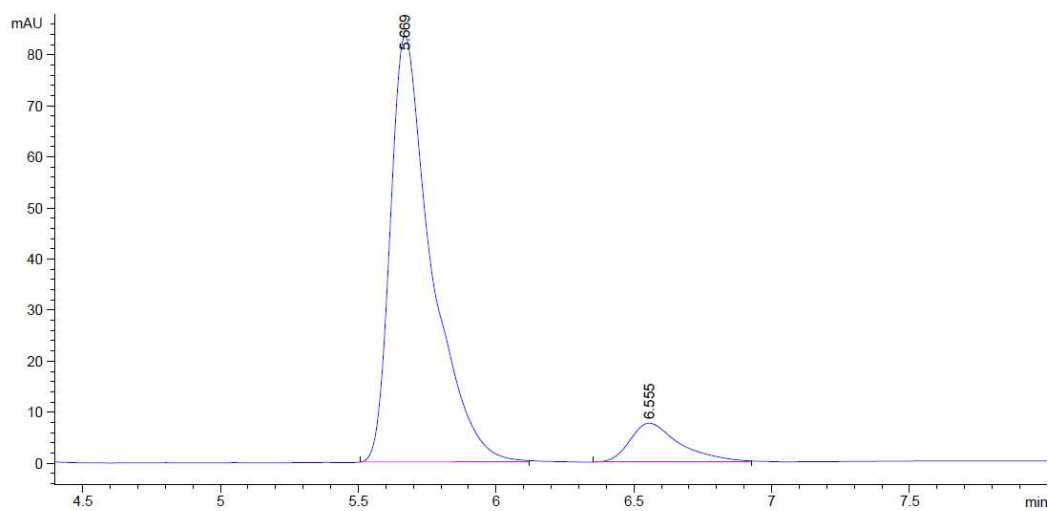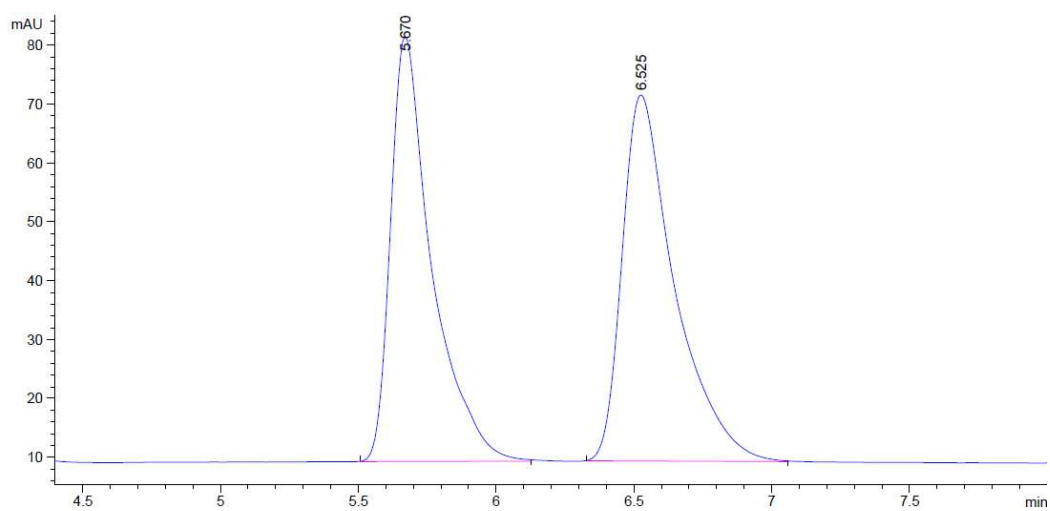

| Peak # | RetTime [min] | Type | Width [min] | Area [mAU*s] | Height [mAU] | Area %  |
|--------|---------------|------|-------------|--------------|--------------|---------|
| 1      | 5.669         | BB   | 0.1507      | 865.03510    | 83.63120     | 90.0672 |
| 2      | 6.555         | BB   | 0.1844      | 95.39750     | 7.60194      | 9.9328  |

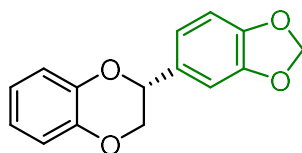

**6i**

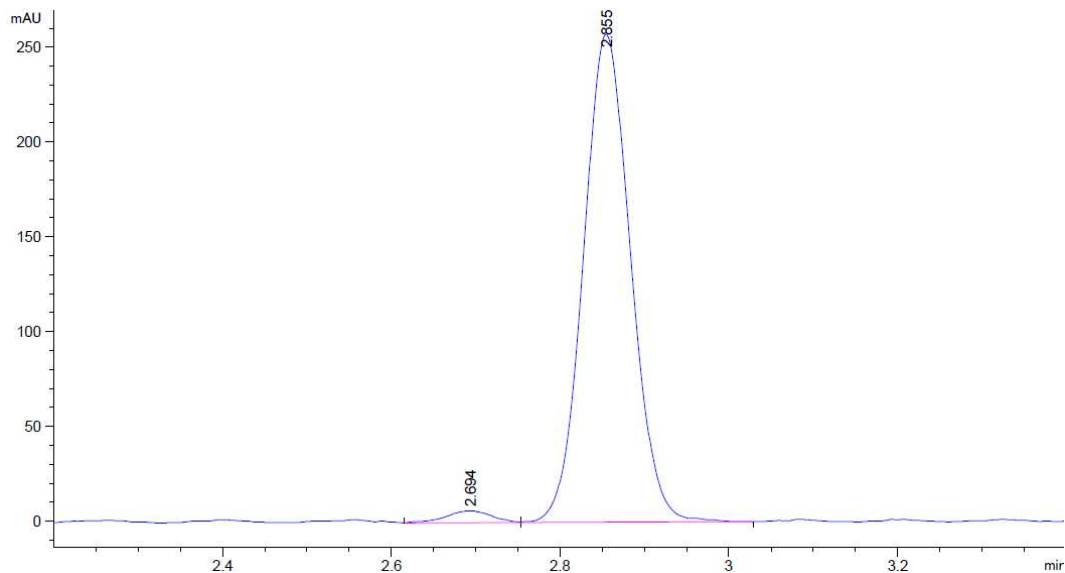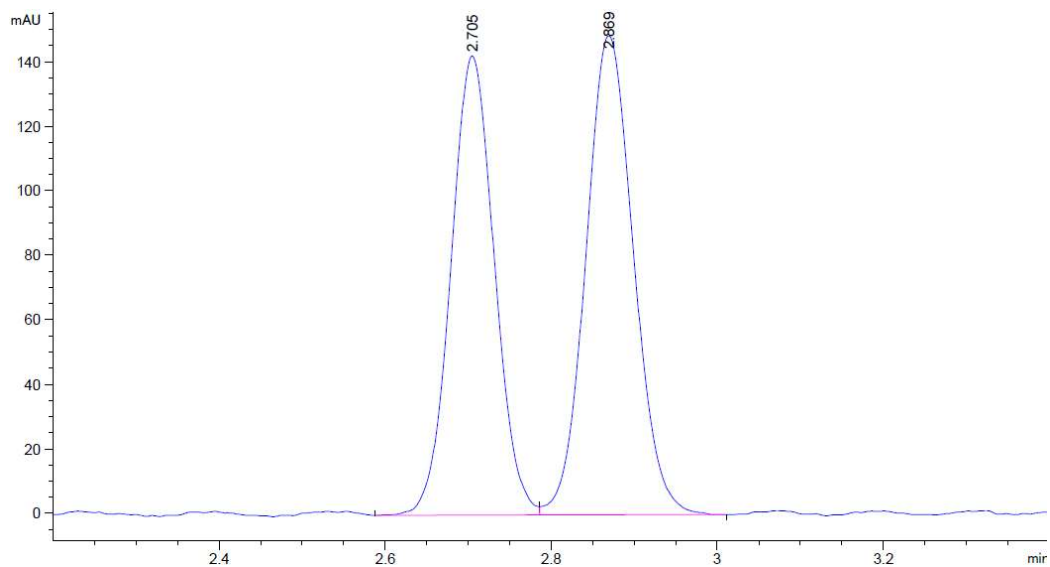

| Peak # | RetTime [min] | Type | Width [min] | Area [mAU*s] | Height [mAU] | Area %  |
|--------|---------------|------|-------------|--------------|--------------|---------|
| 1      | 2.694         | BV   | 0.0548      | 23.19637     | 6.18534      | 2.2624  |
| 2      | 2.855         | VV R | 0.0604      | 1002.11853   | 257.42316    | 97.7376 |

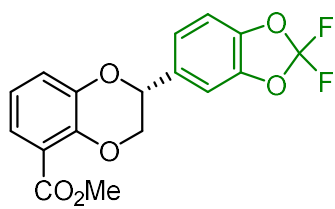

6j

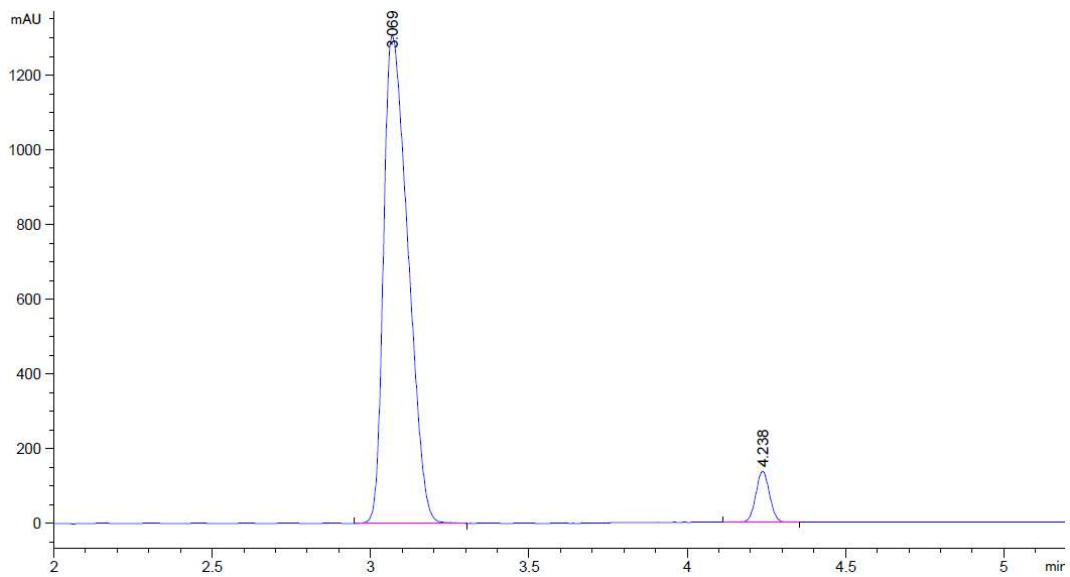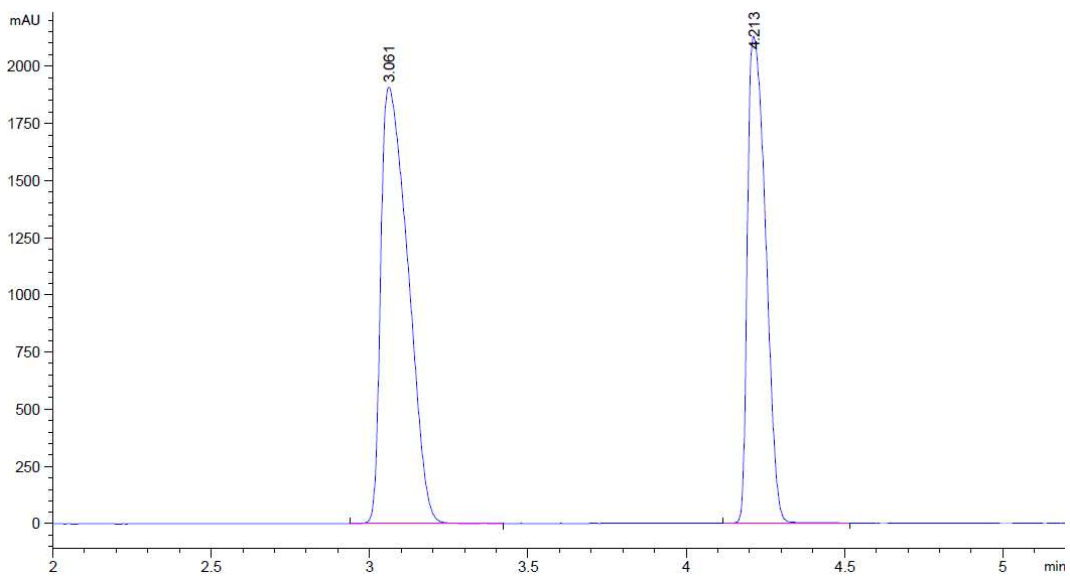

| Peak # | RetTime [min] | Type | Width [min] | Area [mAU*s] | Height [mAU] | Area %  |
|--------|---------------|------|-------------|--------------|--------------|---------|
| 1      | 3.069         | BV R | 0.0863      | 6978.27295   | 1306.50940   | 94.4355 |
| 2      | 4.238         | VV R | 0.0470      | 411.18750    | 137.01413    | 5.5645  |



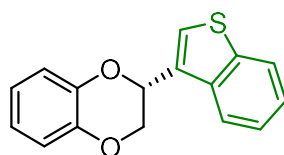

**6k**

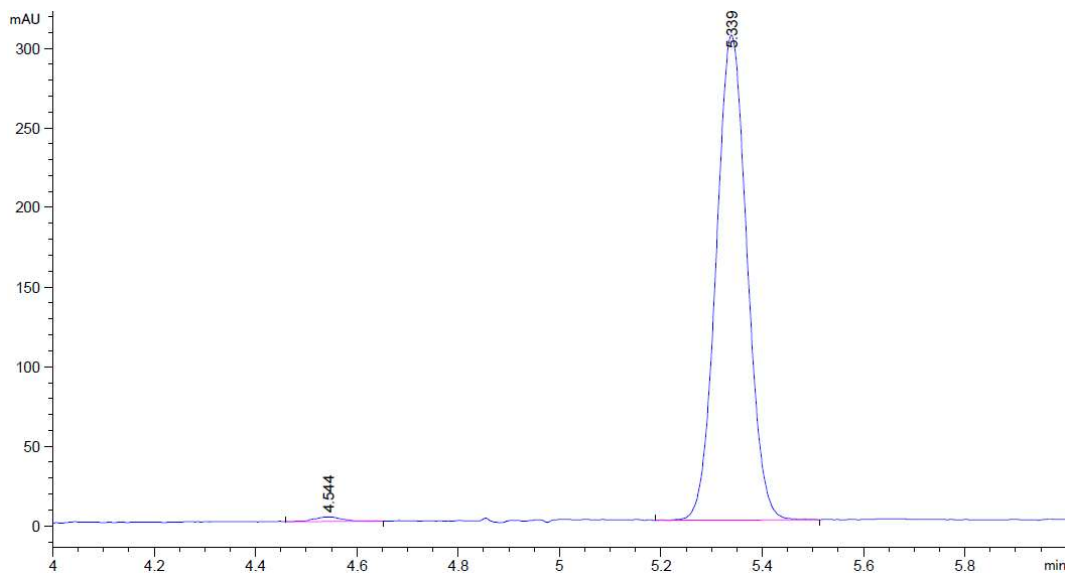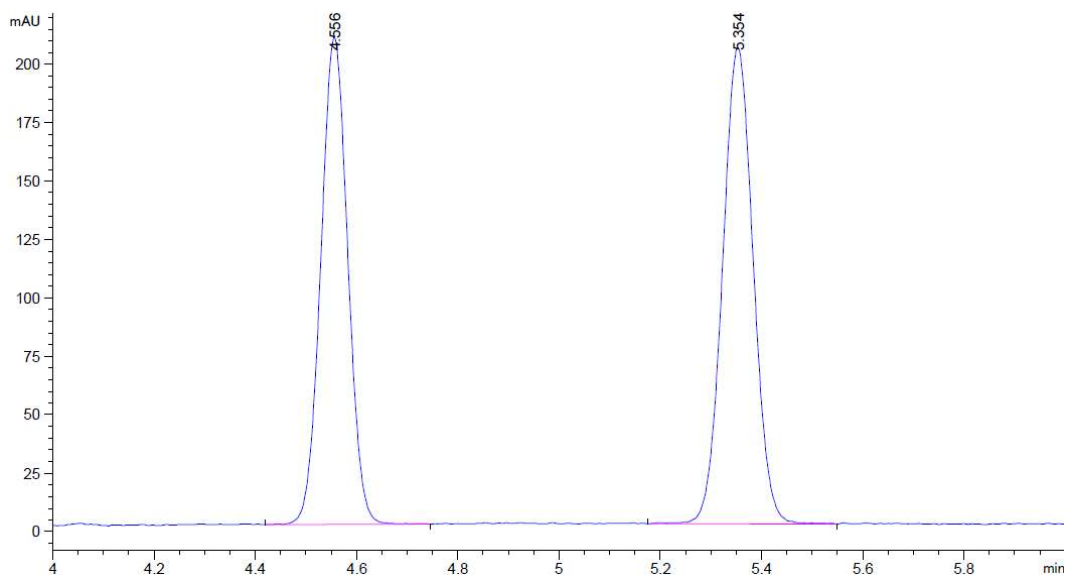

| Peak # | RetTime [min] | Type | Width [min] | Area [mAU*s] | Height [mAU] | Area %  |
|--------|---------------|------|-------------|--------------|--------------|---------|
| 1      | 4.544         | VV R | 0.0545      | 11.69475     | 2.84489      | 0.9008  |
| 2      | 5.339         | VV R | 0.0658      | 1286.58459   | 304.60342    | 99.0992 |

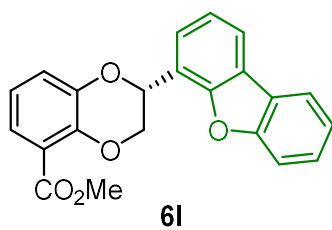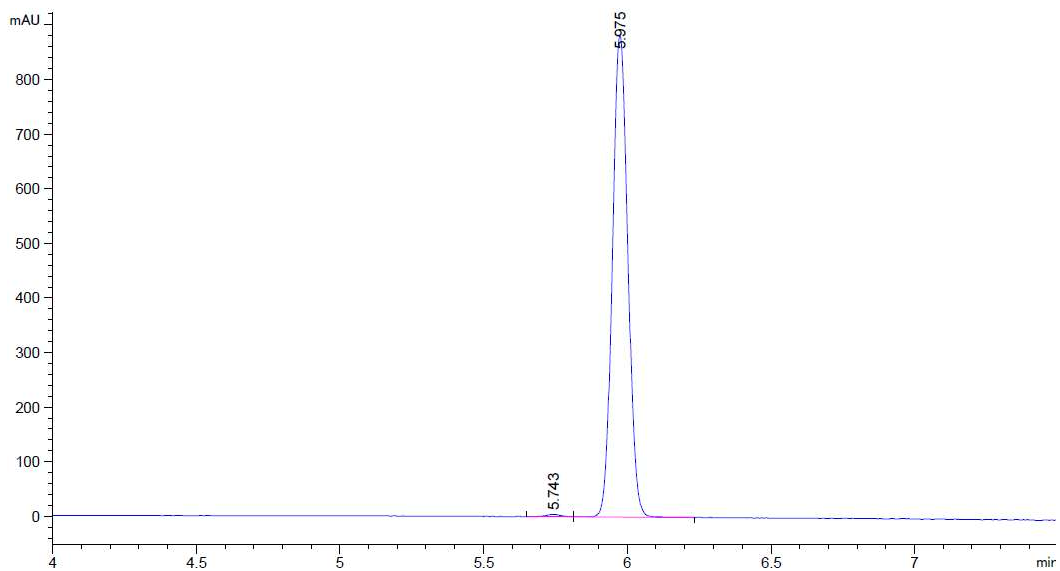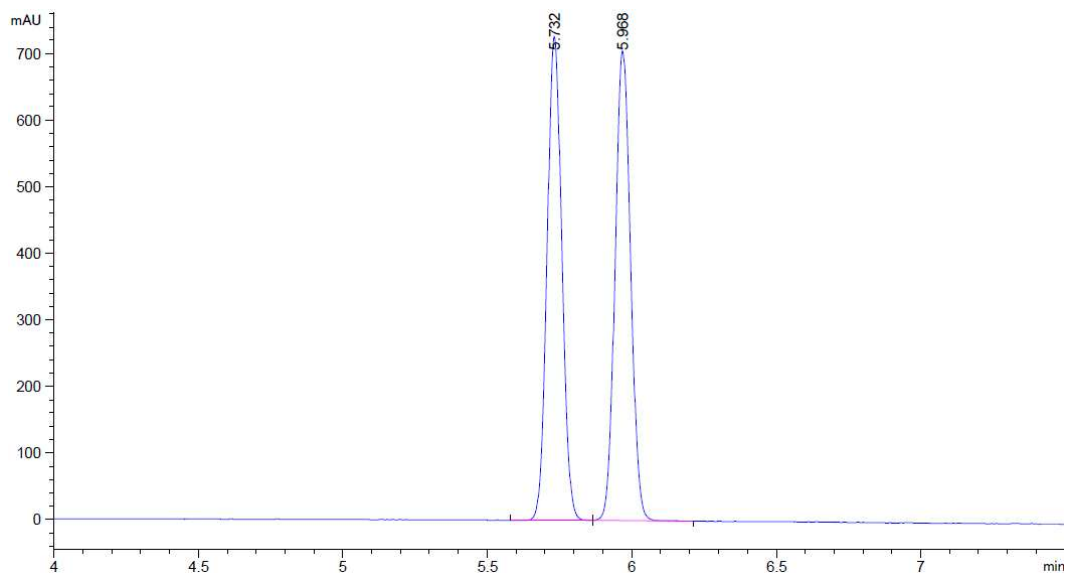

| Peak # | RetTime [min] | Type | Width [min] | Area [mAU*s] | Height [mAU] | Area %  |
|--------|---------------|------|-------------|--------------|--------------|---------|
| 1      | 5.743         | VB R | 0.0487      | 16.10260     | 4.56140      | 0.4874  |
| 2      | 5.975         | VV R | 0.0586      | 3287.74731   | 880.61395    | 99.5126 |

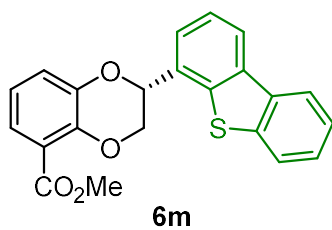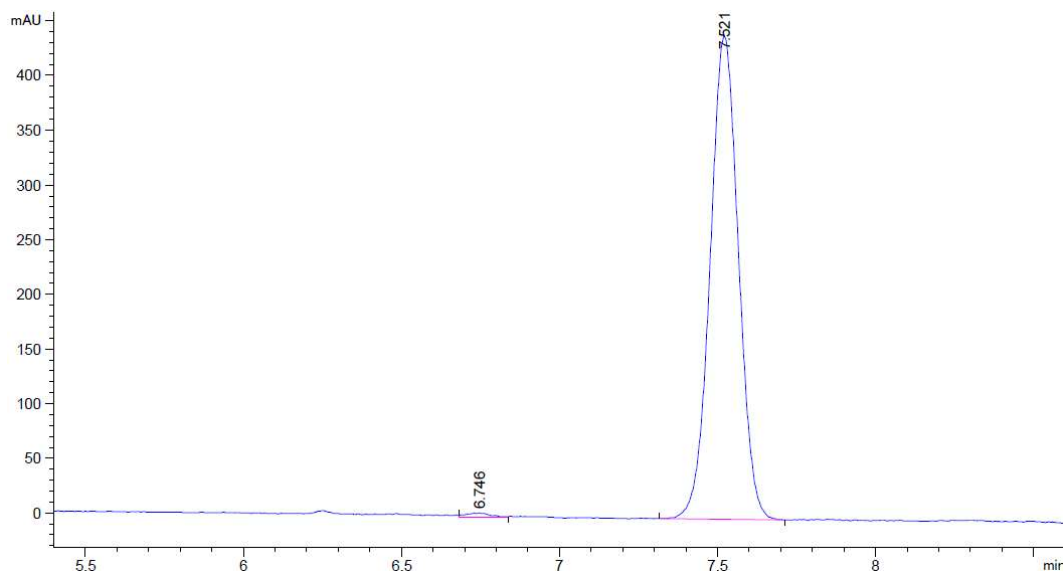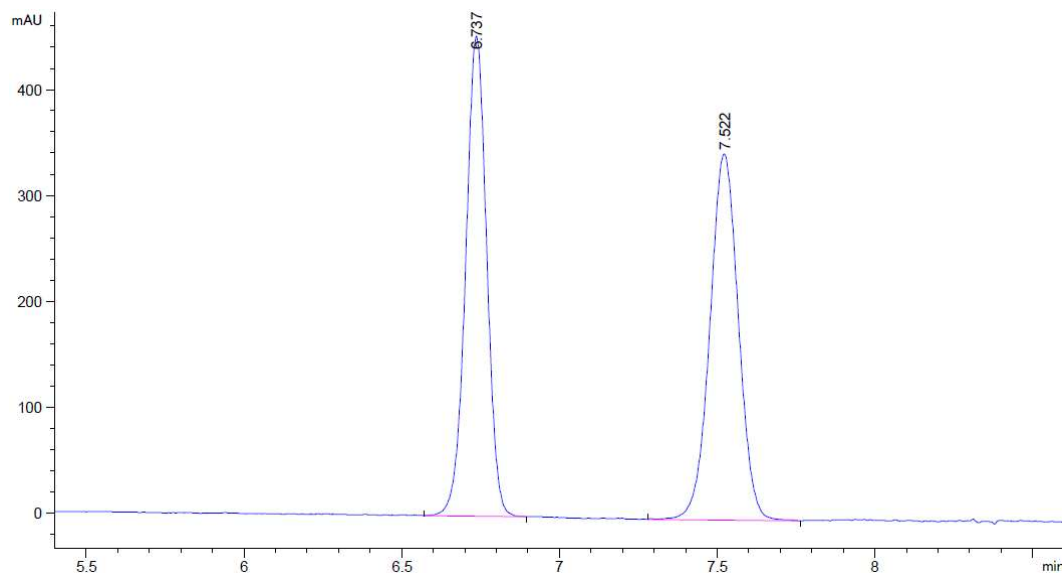

| Peak # | RetTime [min] | Type | Width [min] | Area [mAU*s] | Height [mAU] | Area %  |
|--------|---------------|------|-------------|--------------|--------------|---------|
| 1      | 6.746         | MM   | 0.0803      | 14.87096     | 3.08540      | 0.5372  |
| 2      | 7.521         | VB R | 0.0967      | 2753.31616   | 441.66220    | 99.4628 |

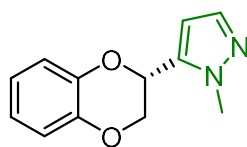

**6n**

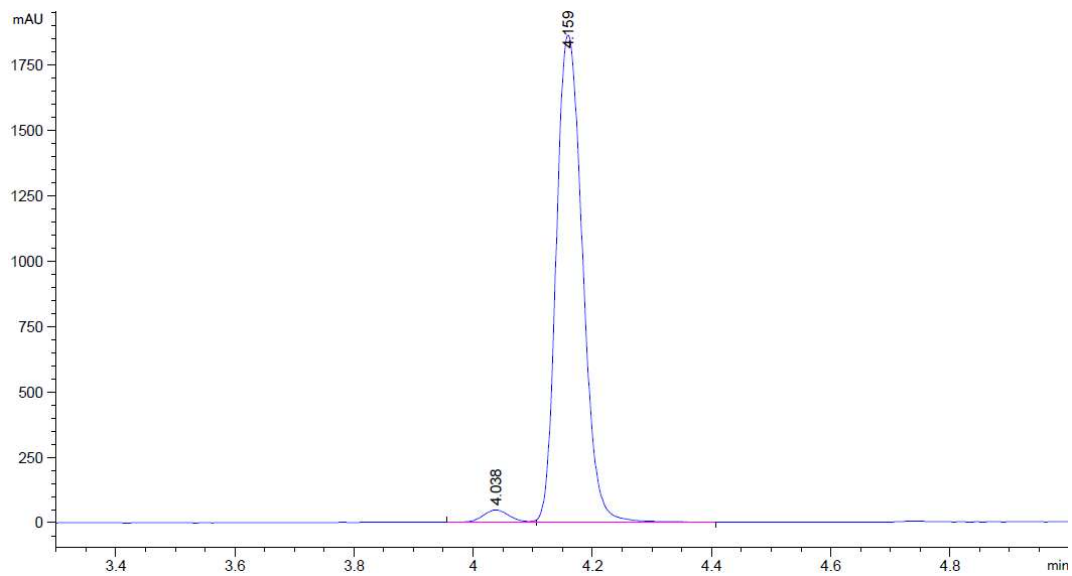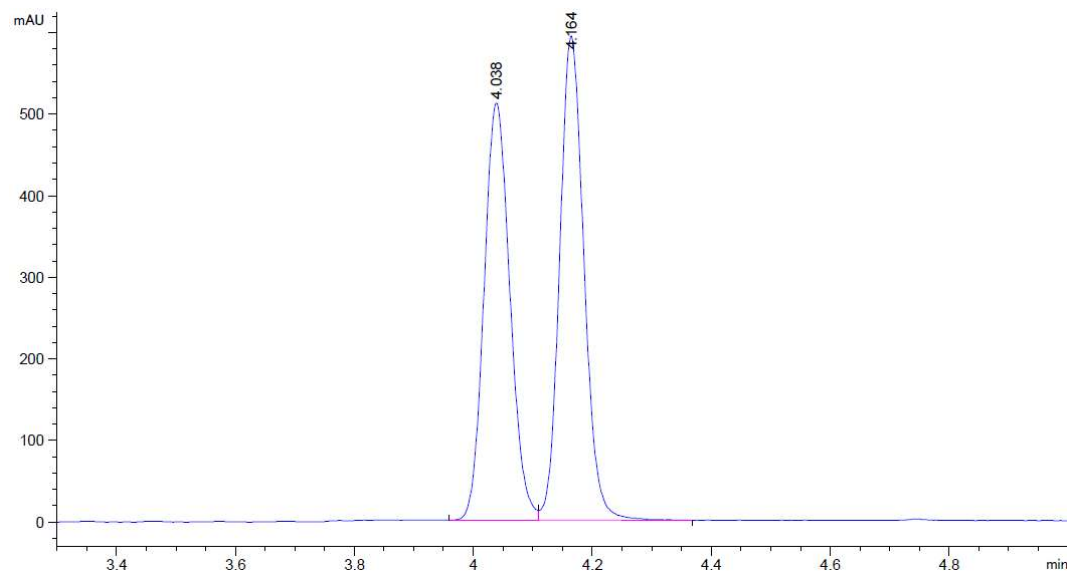

| Peak # | RetTime [min] | Type | Width [min] | Area [mAU*s] | Height [mAU] | Area %  |
|--------|---------------|------|-------------|--------------|--------------|---------|
| 1      | 4.038         | BV E | 0.0471      | 141.52544    | 47.02908     | 2.4352  |
| 2      | 4.159         | VV R | 0.0485      | 5670.10840   | 1861.90784   | 97.5648 |

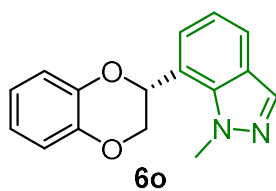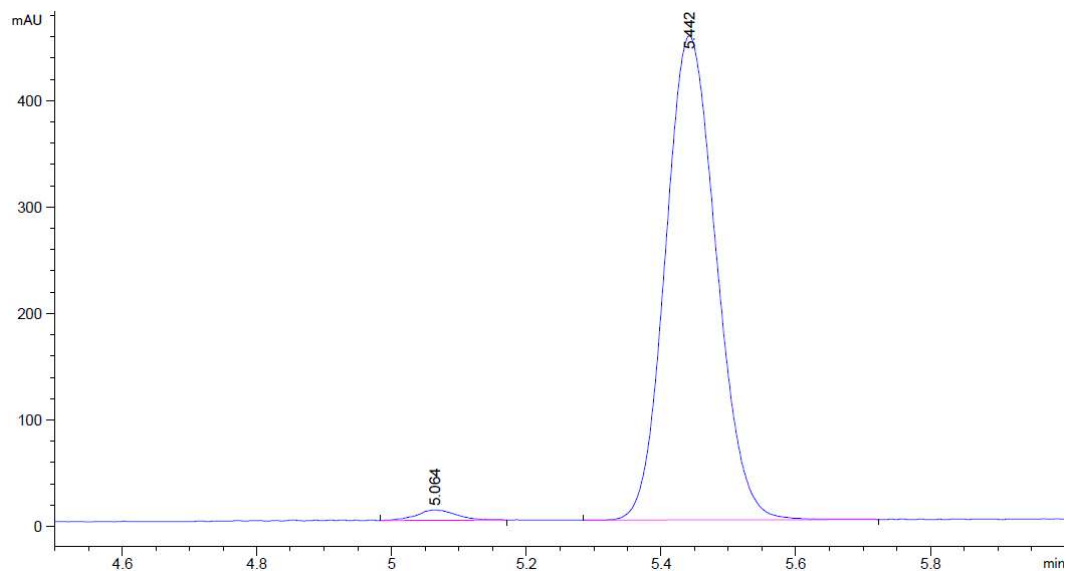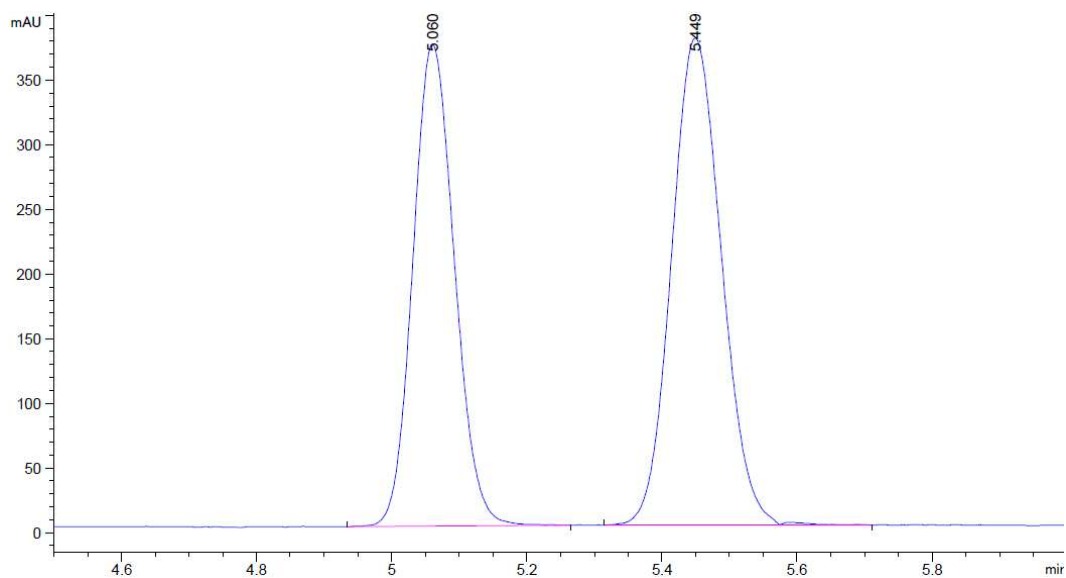

| Peak # | RetTime [min] | Type | Width [min] | Area [mAU*s] | Height [mAU] | Area %  |
|--------|---------------|------|-------------|--------------|--------------|---------|
| 1      | 5.064         | BV R | 0.0595      | 40.43837     | 9.73639      | 1.6685  |
| 2      | 5.442         | VV R | 0.0826      | 2383.20703   | 454.81406    | 98.3315 |

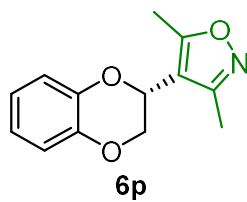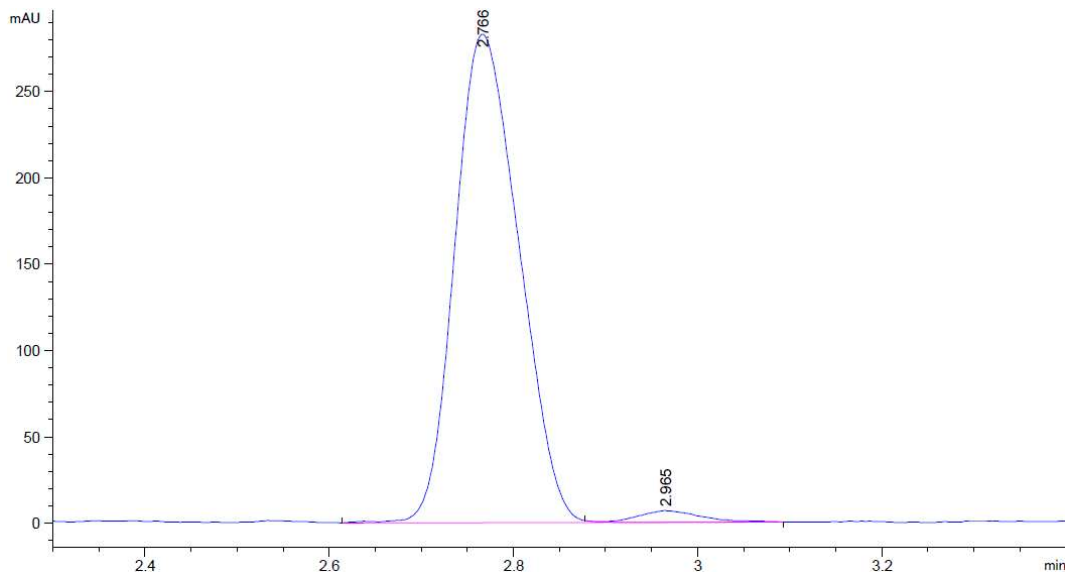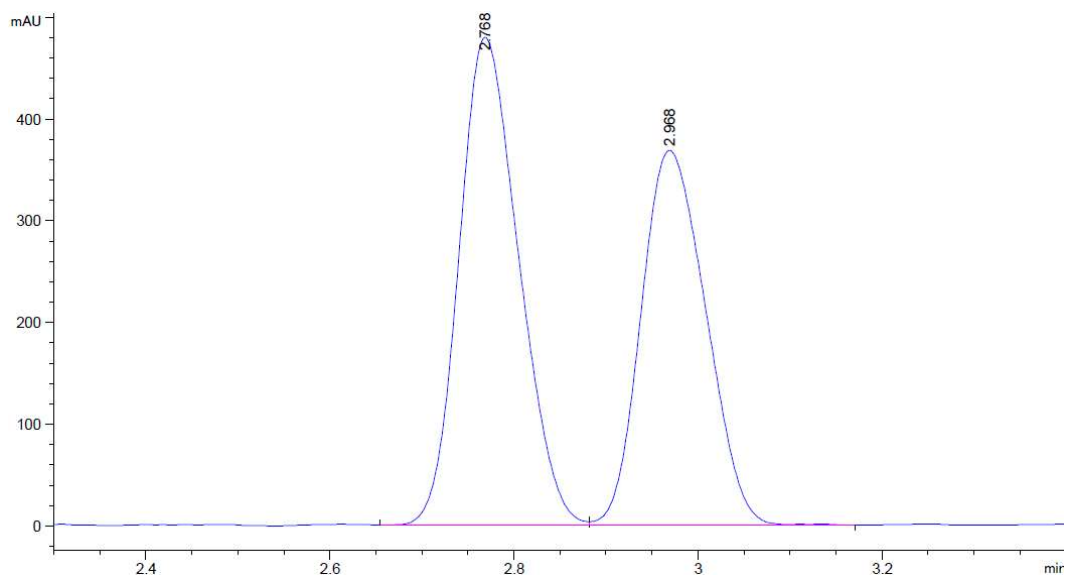

| Peak # | RetTime [min] | Type | Width [min] | Area [mAU*s] | Height [mAU] | Area %  |
|--------|---------------|------|-------------|--------------|--------------|---------|
| 1      | 2.766         | VV R | 0.0742      | 1361.65125   | 282.82779    | 97.7153 |
| 2      | 2.965         | VB E | 0.0628      | 31.83715     | 6.71283      | 2.2847  |

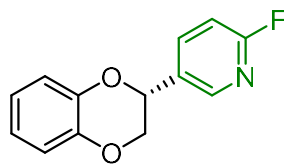

6q

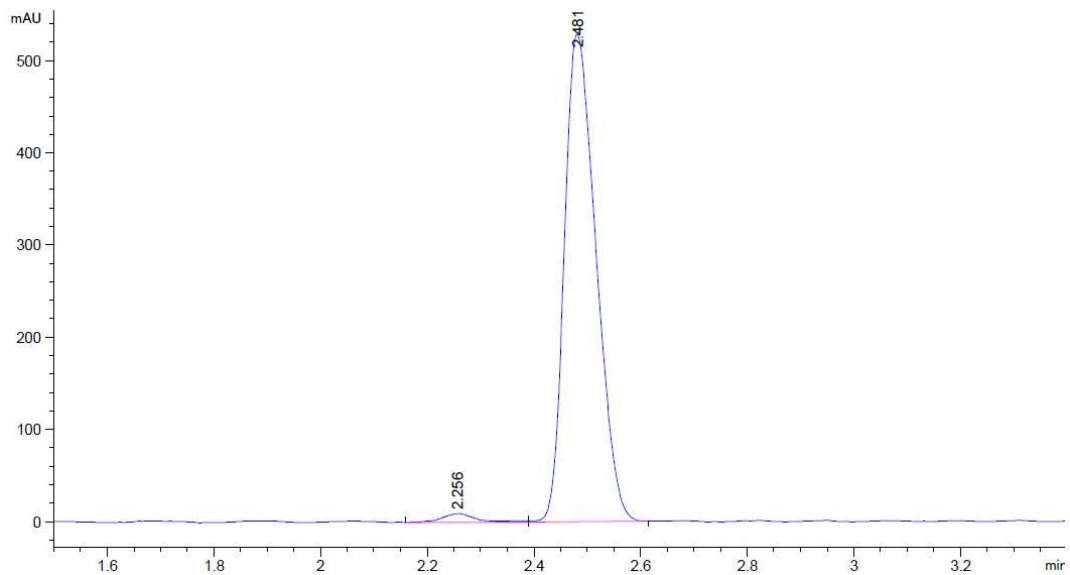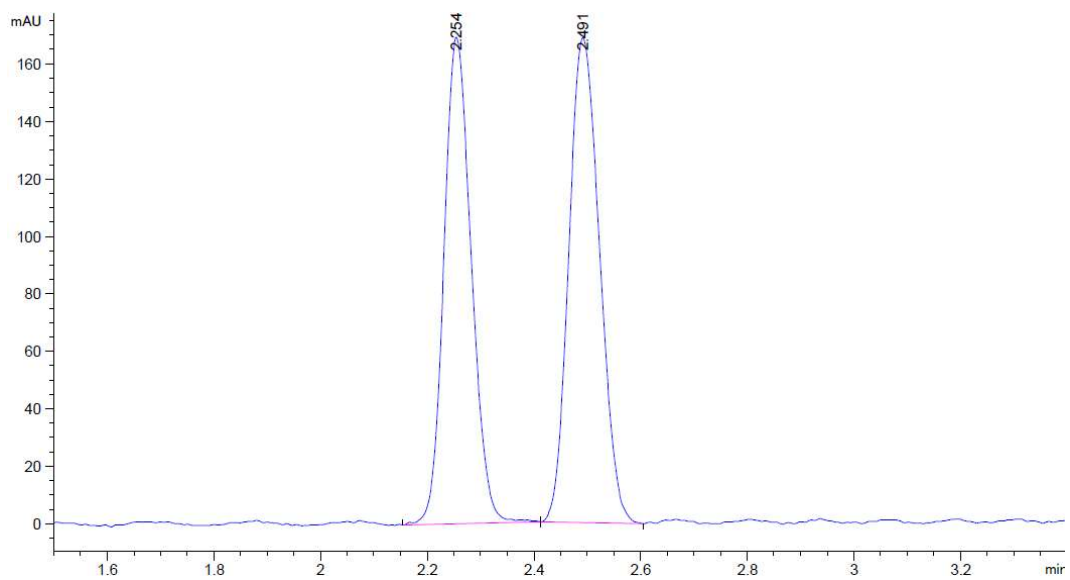

| Peak # | RetTime [min] | Type | Width [min] | Area [mAU*s] | Height [mAU] | Area %  |
|--------|---------------|------|-------------|--------------|--------------|---------|
| 1      | 2.256         | BV R | 0.0602      | 41.45049     | 9.35714      | 1.8693  |
| 2      | 2.481         | VB   | 0.0650      | 2175.95947   | 528.83002    | 98.1307 |

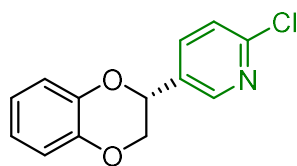

6r

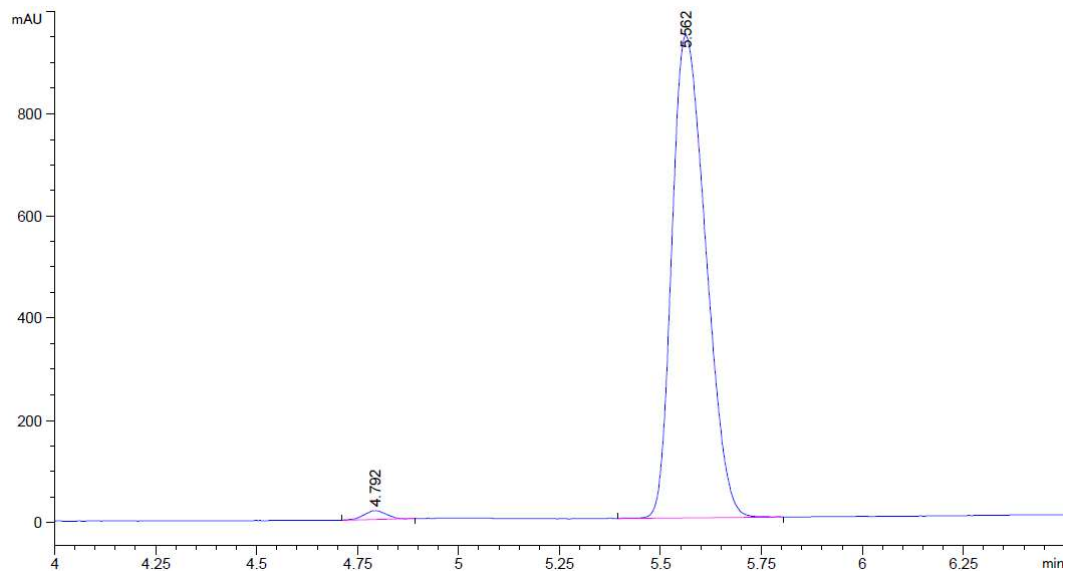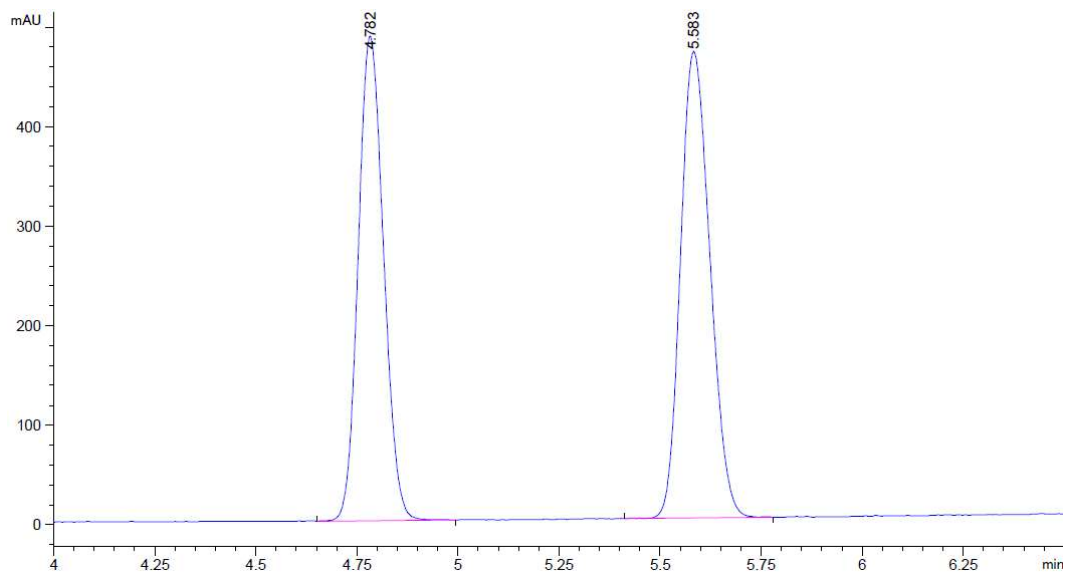

| Peak # | RetTime [min] | Type | Width [min] | Area [mAU*s] | Height [mAU] | Area %  |
|--------|---------------|------|-------------|--------------|--------------|---------|
| 1      | 4.792         | BV R | 0.0582      | 66.86068     | 17.27545     | 1.2048  |
| 2      | 5.562         | VV R | 0.0917      | 5482.57568   | 944.47418    | 98.7952 |



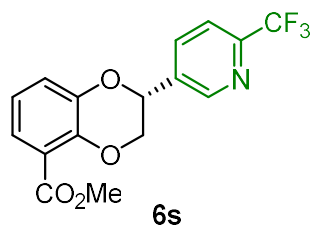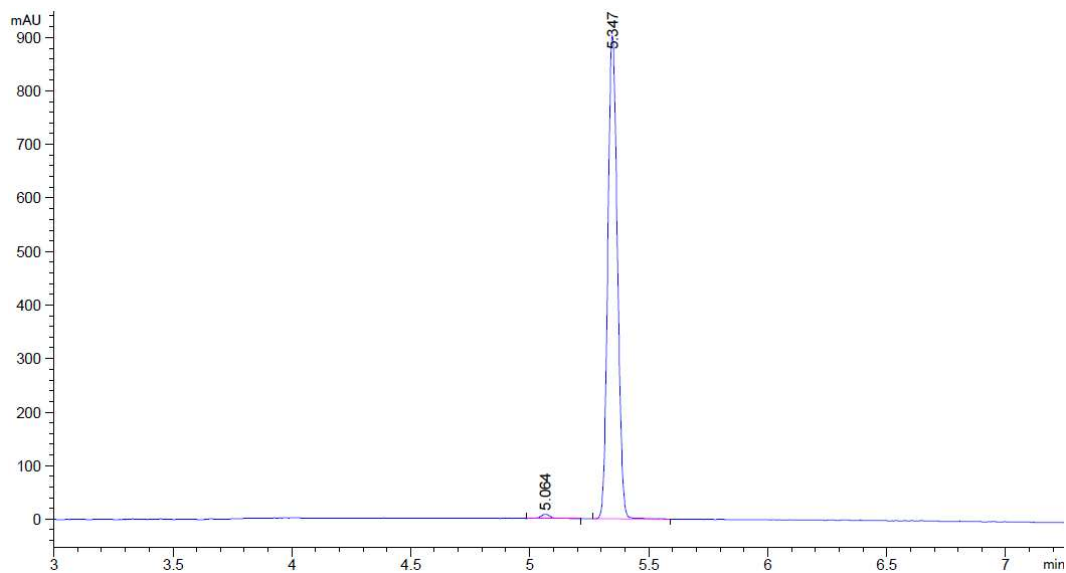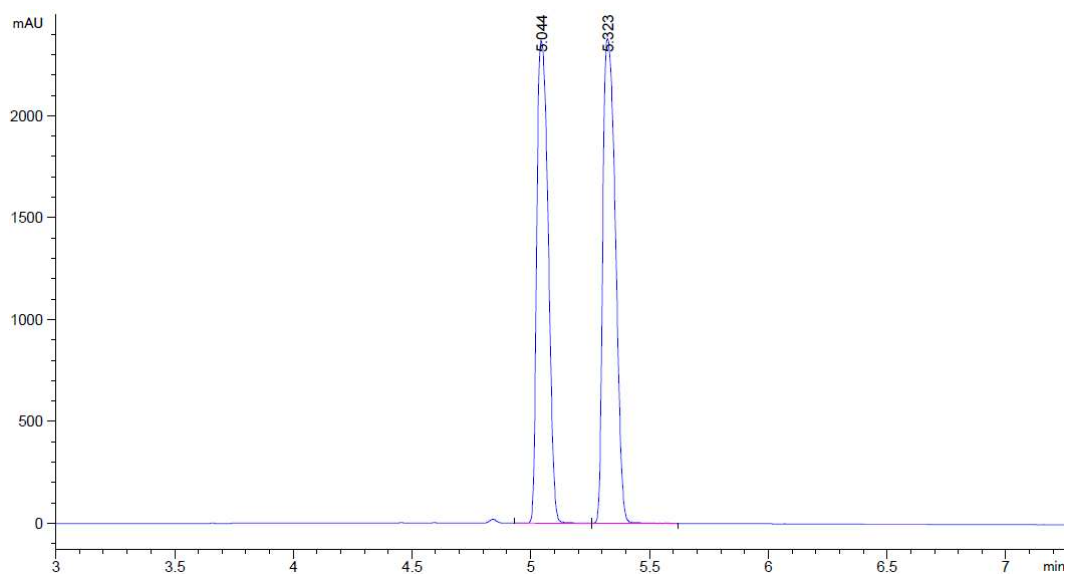

| Peak # | RetTime [min] | Type | Width [min] | Area [mAU*s] | Height [mAU] | Area %  |
|--------|---------------|------|-------------|--------------|--------------|---------|
| 1      | 5.064         | BV R | 0.0435      | 22.50614     | 7.72511      | 0.8858  |
| 2      | 5.347         | BV R | 0.0441      | 2518.16260   | 901.88599    | 99.1142 |

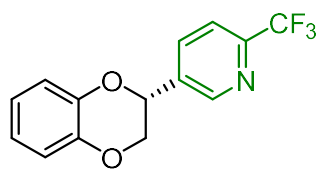

**6t**

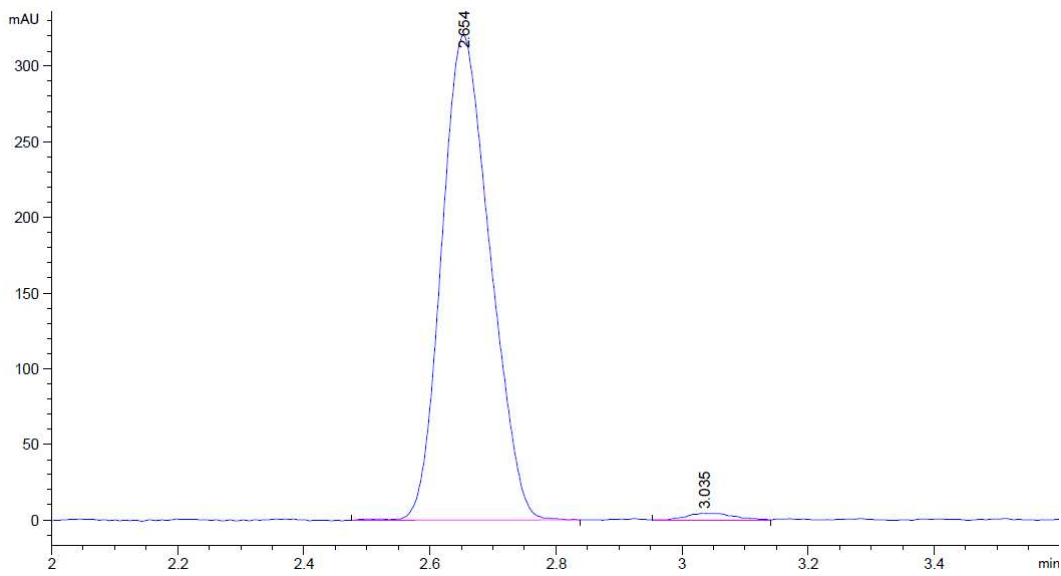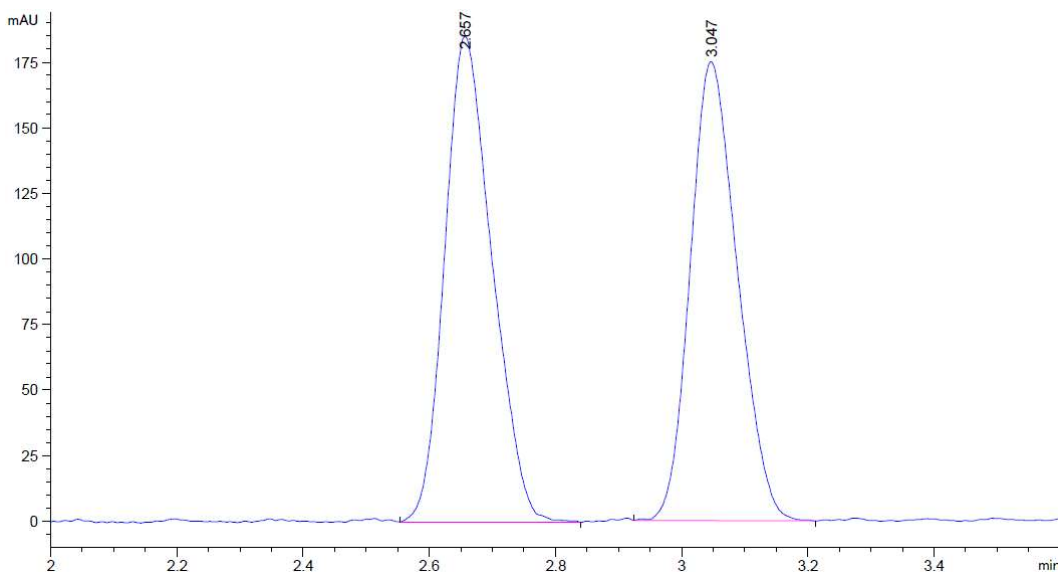

| Peak # | RetTime [min] | Type | Width [min] | Area [mAU*s] | Height [mAU] | Area %  |
|--------|---------------|------|-------------|--------------|--------------|---------|
| 1      | 2.654         | VV R | 0.0829      | 1713.59778   | 320.61575    | 98.6465 |
| 2      | 3.035         | BV R | 0.0625      | 23.51180     | 4.61036      | 1.3535  |

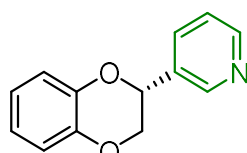

6u

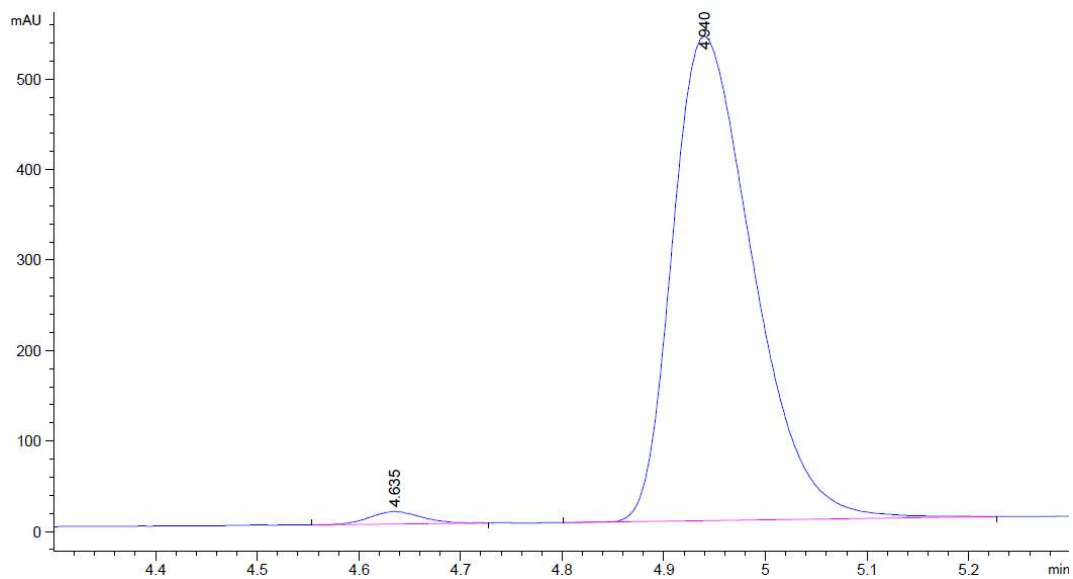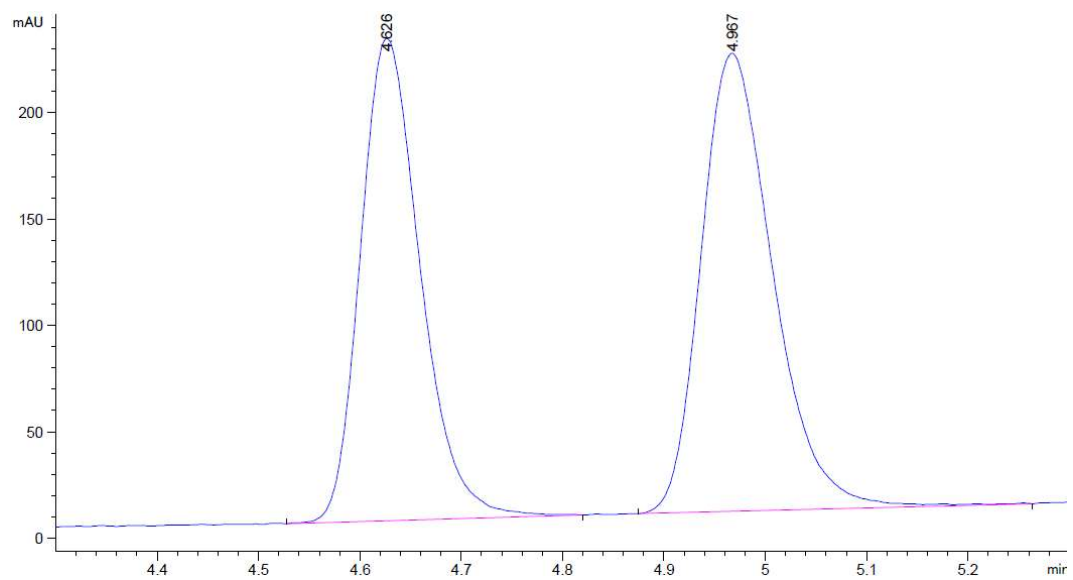

| Peak # | RetTime [min] | Type | Width [min] | Area [mAU*s] | Height [mAU] | Area %  |
|--------|---------------|------|-------------|--------------|--------------|---------|
| 1      | 4.635         | BV R | 0.0557      | 48.27862     | 13.68087     | 1.6114  |
| 2      | 4.940         | BV R | 0.0852      | 2947.83423   | 535.42896    | 98.3886 |

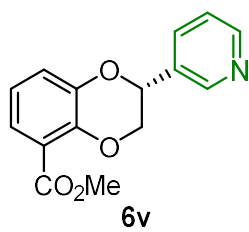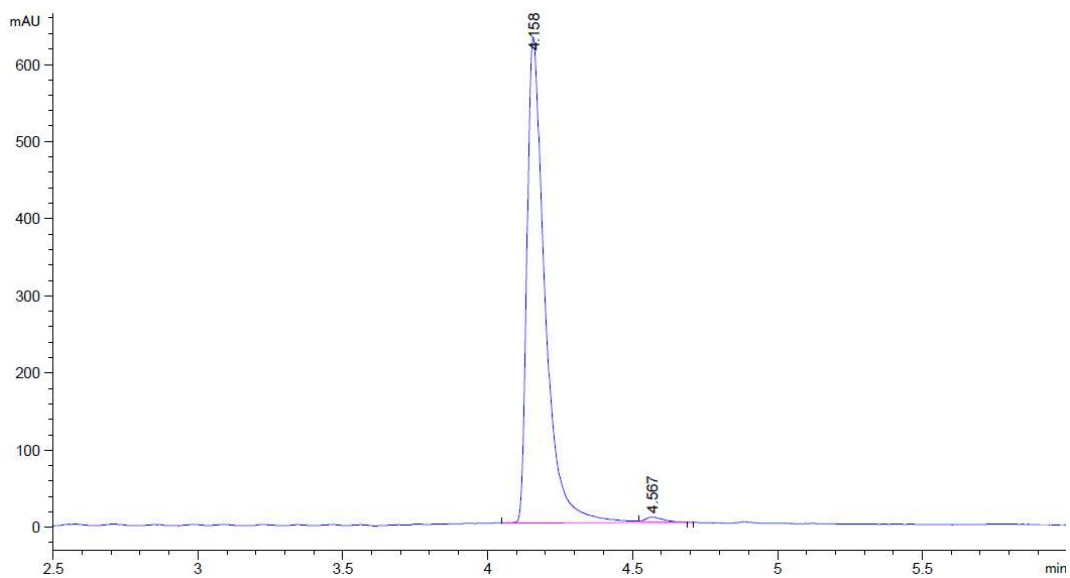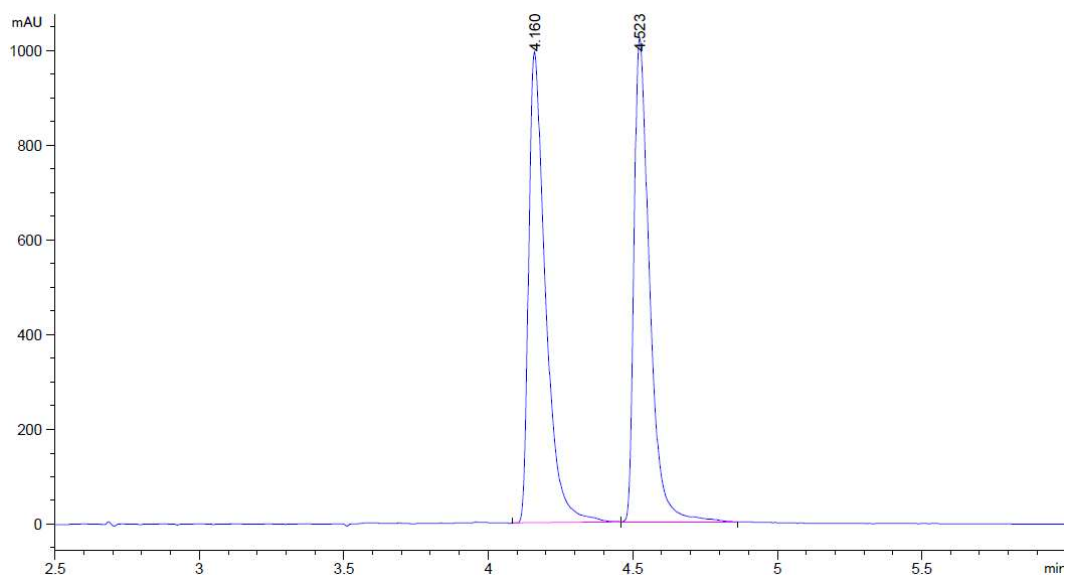

| Peak # | RetTime [min] | Type | Width [min] | Area [mAU*s] | Height [mAU] | Area %  |
|--------|---------------|------|-------------|--------------|--------------|---------|
| 1      | 4.158         | BV R | 0.0636      | 2731.02612   | 629.32831    | 99.0469 |
| 2      | 4.567         | VV E | 0.0608      | 26.28027     | 6.09497      | 0.9531  |

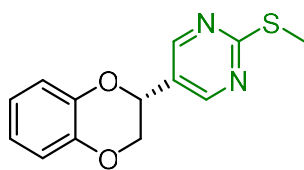

6w

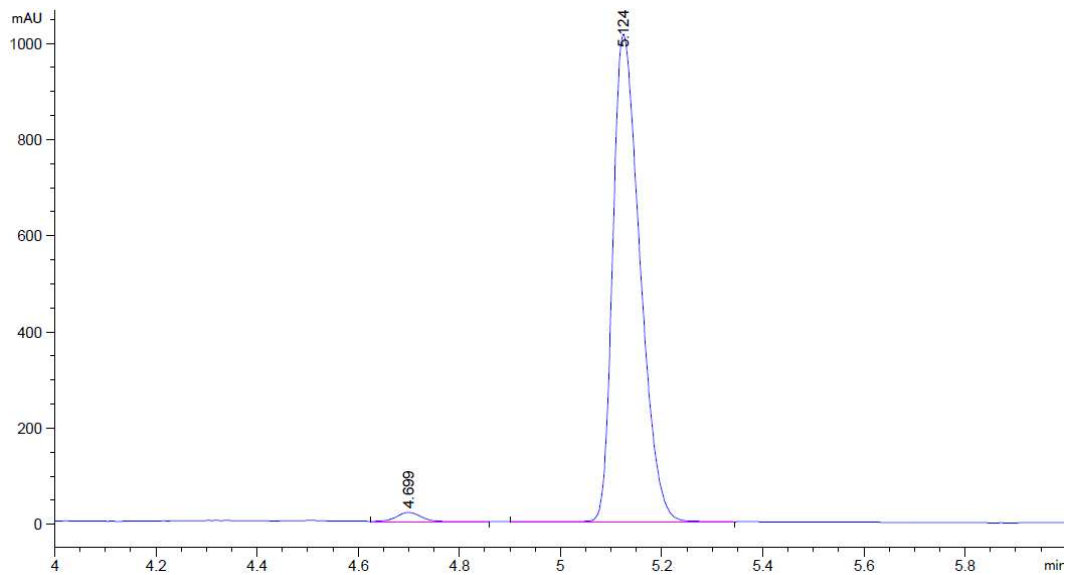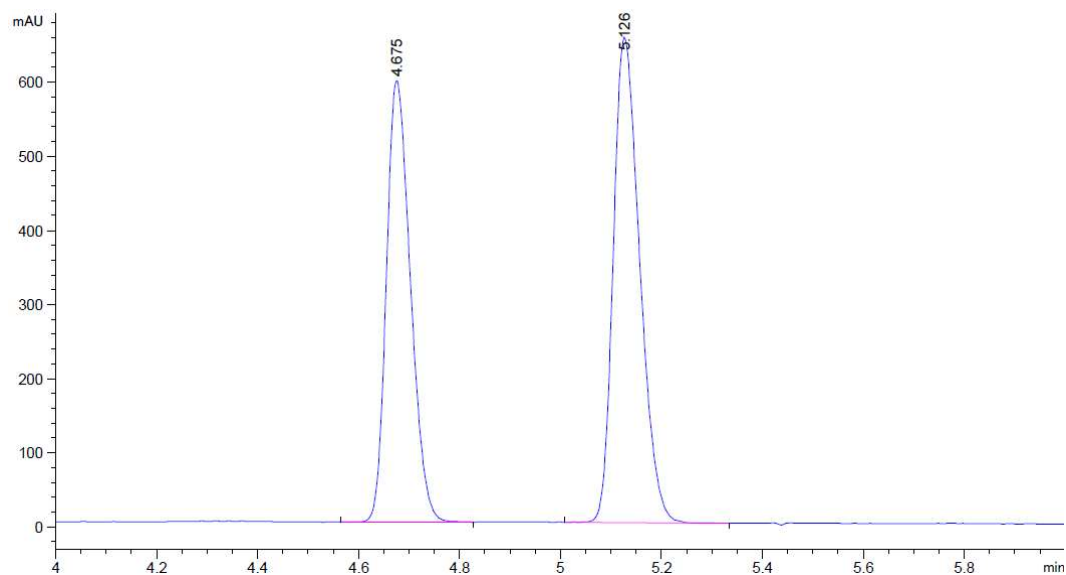

| Peak # | RetTime [min] | Type | Width [min] | Area [mAU*s] | Height [mAU] | Area %  |
|--------|---------------|------|-------------|--------------|--------------|---------|
| 1      | 4.699         | BV R | 0.0527      | 67.68853     | 19.17303     | 1.7596  |
| 2      | 5.124         | VV R | 0.0580      | 3779.03931   | 1013.38159   | 98.2404 |

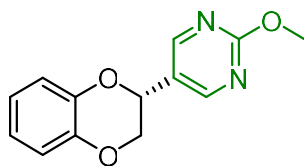

6x

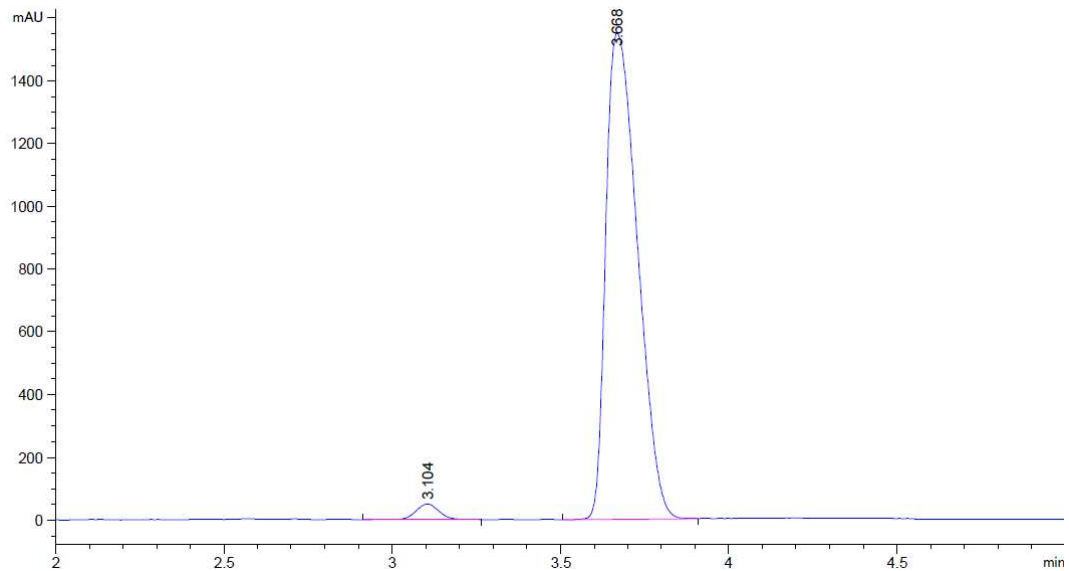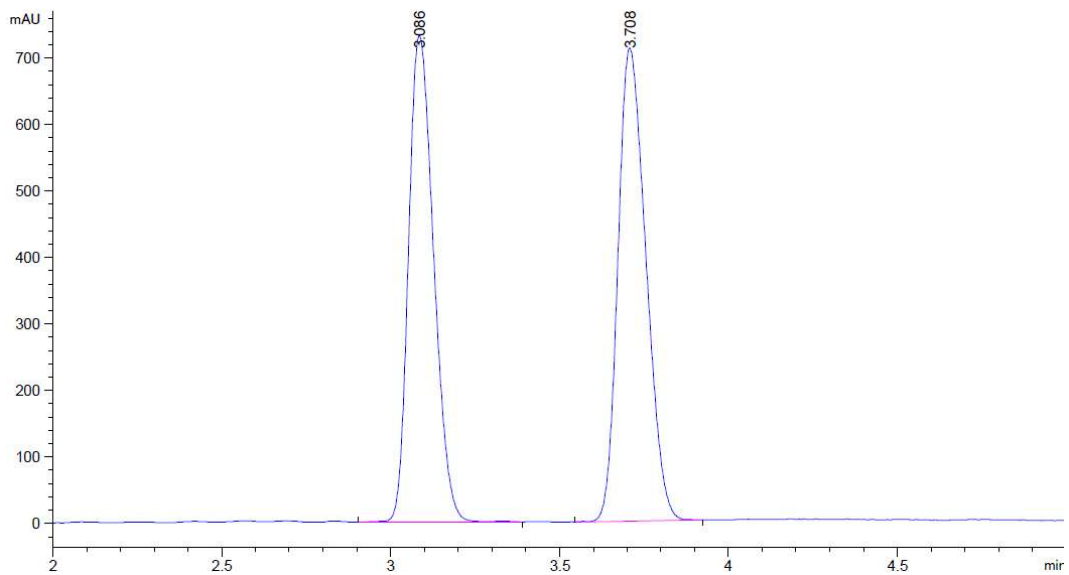

| Peak # | RetTime [min] | Type | Width [min] | Area [mAU*s] | Height [mAU] | Area %  |
|--------|---------------|------|-------------|--------------|--------------|---------|
| 1      | 3.104         | VB R | 0.0771      | 240.69904    | 49.61906     | 2.3265  |
| 2      | 3.668         | BB   | 0.1036      | 1.01054e4    | 1549.13367   | 97.6735 |

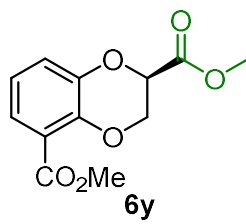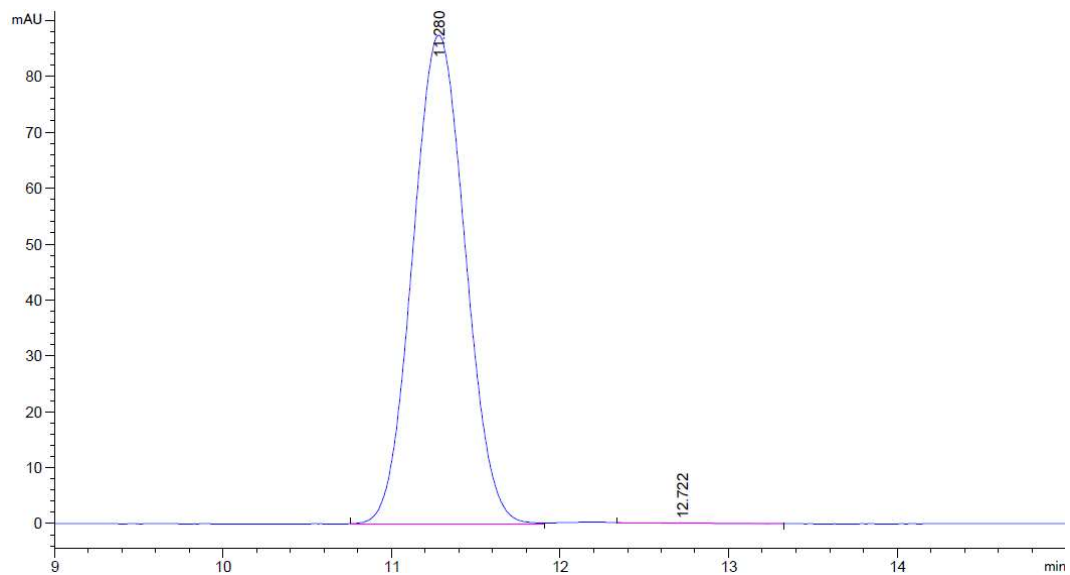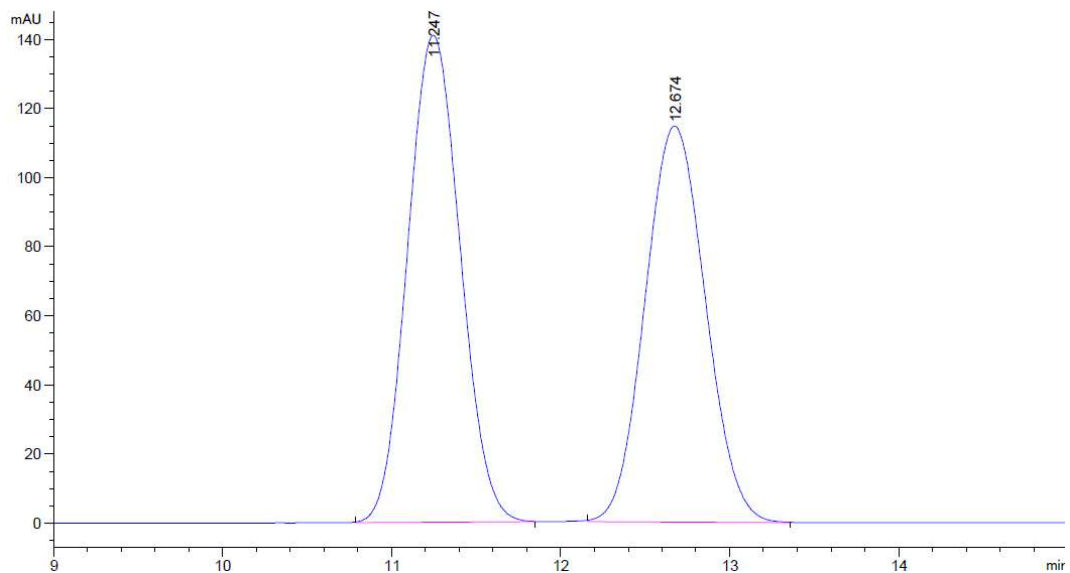

| Peak # | RetTime [min] | Type | Width [min] | Area [mAU*s] | Height [mAU] | Area %  |
|--------|---------------|------|-------------|--------------|--------------|---------|
| 1      | 11.280        | BV   | 0.3406      | 1890.86792   | 87.32867     | 99.8730 |
| 2      | 12.722        | MM   | 0.3859      | 2.40366      | 1.03808e-1   | 0.1270  |

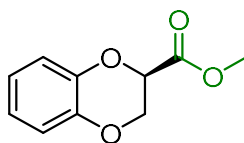

6z

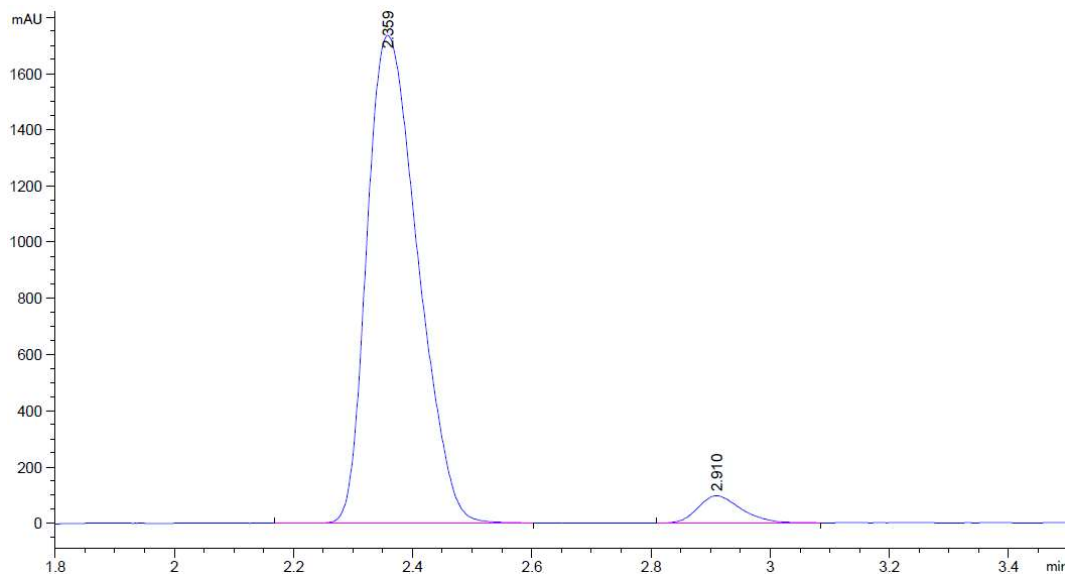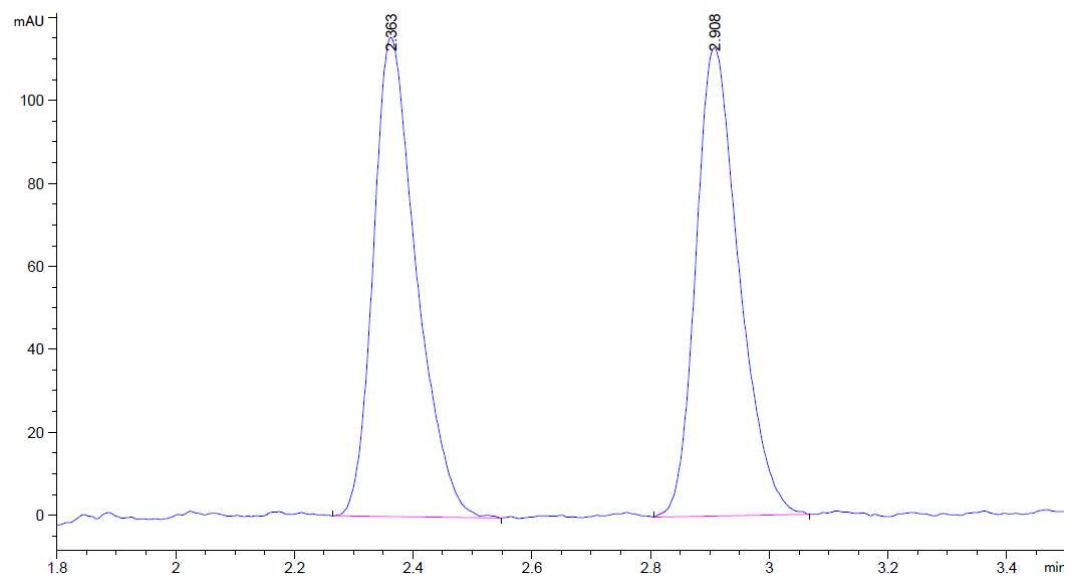

| Peak # | RetTime [min] | Type | Width [min] | Area [mAU*s] | Height [mAU] | Area %  |
|--------|---------------|------|-------------|--------------|--------------|---------|
| 1      | 2.359         | VB R | 0.0920      | 1.02609e4    | 1735.24243   | 95.4334 |
| 2      | 2.910         | BV R | 0.0780      | 491.00027    | 97.13327     | 4.5666  |



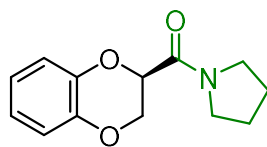

6aa

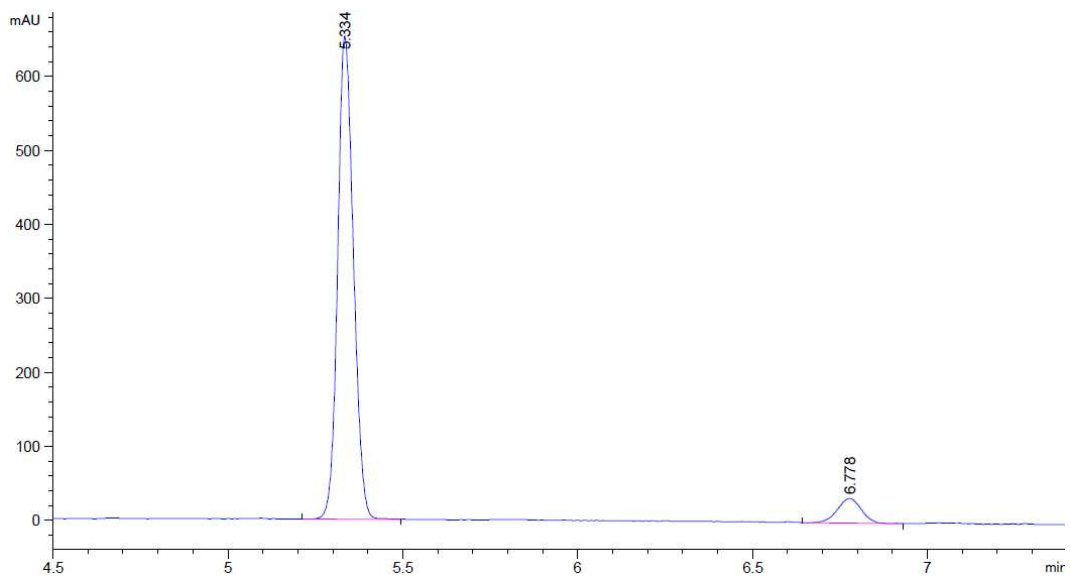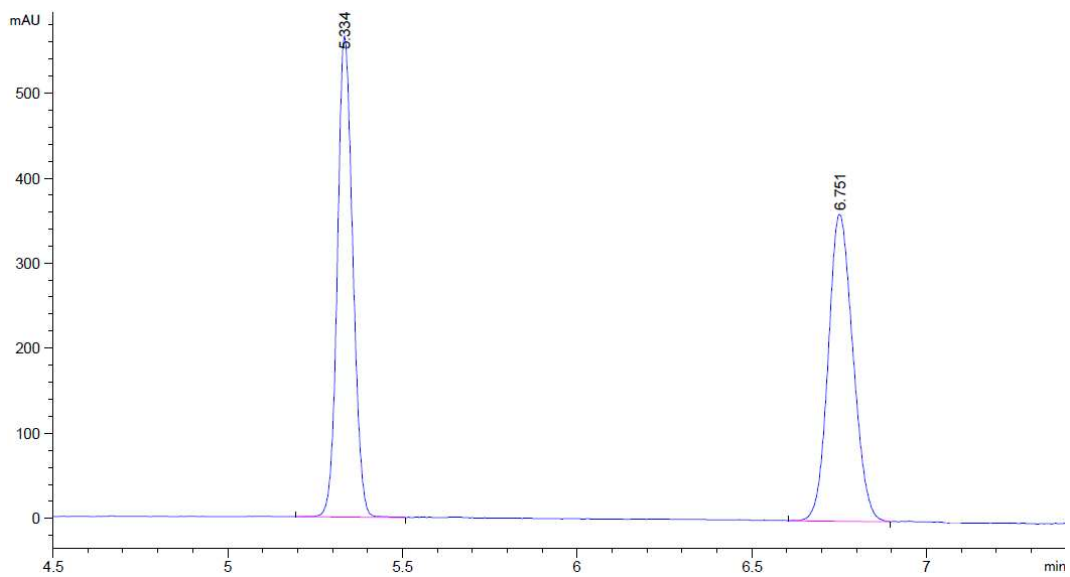

| Peak # | RetTime [min] | Type | Width [min] | Area [mAU*s] | Height [mAU] | Area %  |
|--------|---------------|------|-------------|--------------|--------------|---------|
| 1      | 5.334         | BV R | 0.0486      | 2048.73975   | 652.91919    | 92.8136 |
| 2      | 6.778         | BV R | 0.0692      | 158.63075    | 33.21504     | 7.1864  |

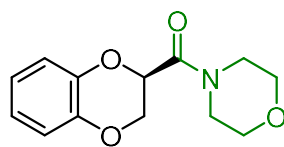

**6ab**

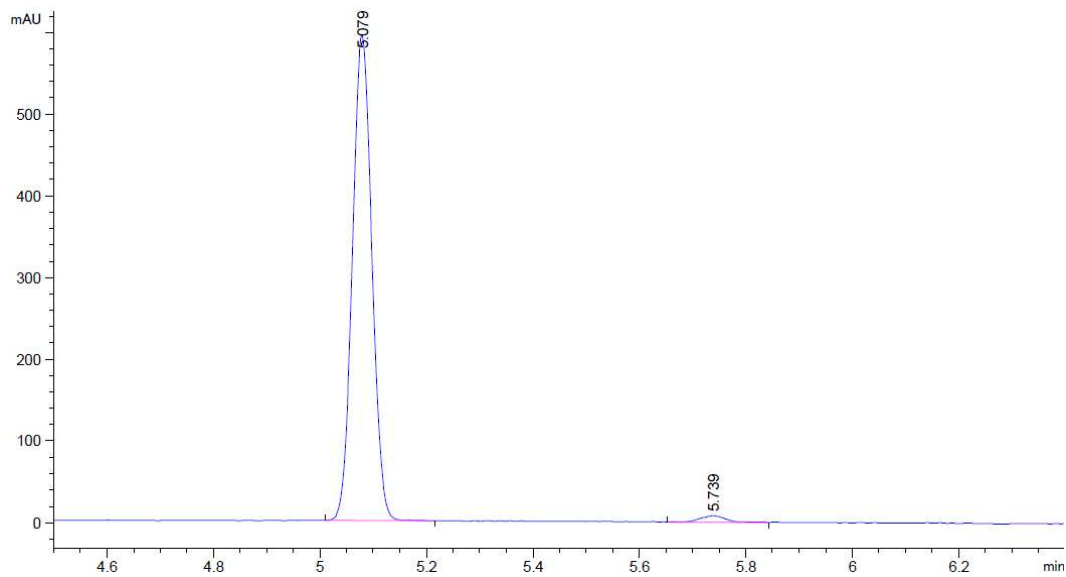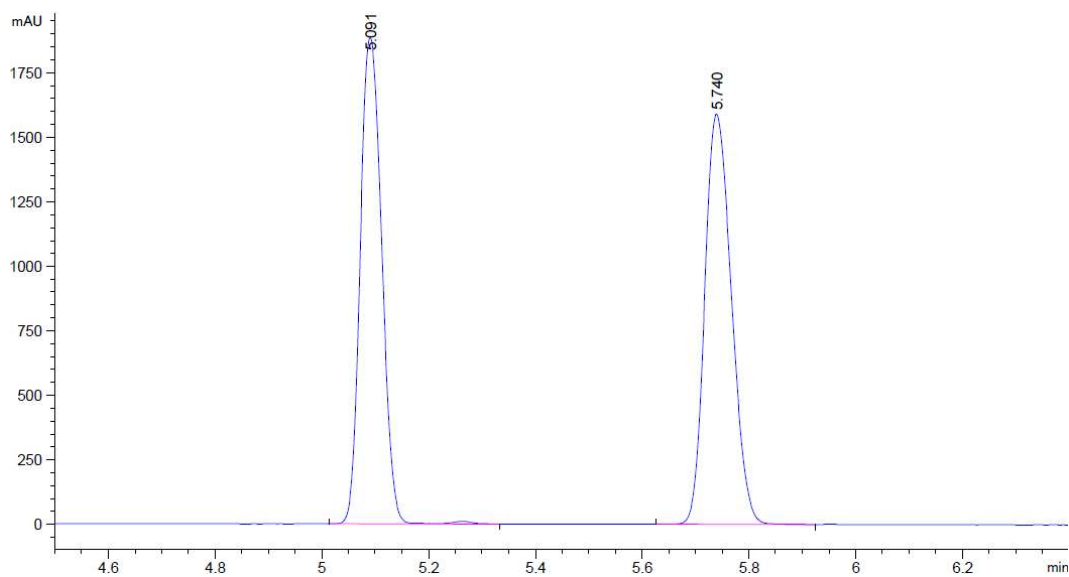

| Peak # | RetTime [min] | Type | Width [min] | Area [mAU*s] | Height [mAU] | Area %  |
|--------|---------------|------|-------------|--------------|--------------|---------|
| 1      | 5.079         | BV R | 0.0396      | 1508.83118   | 594.37537    | 98.2450 |
| 2      | 5.739         | VV R | 0.0481      | 26.95242     | 7.94723      | 1.7550  |

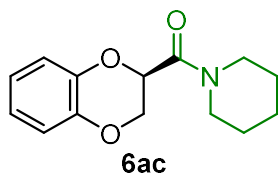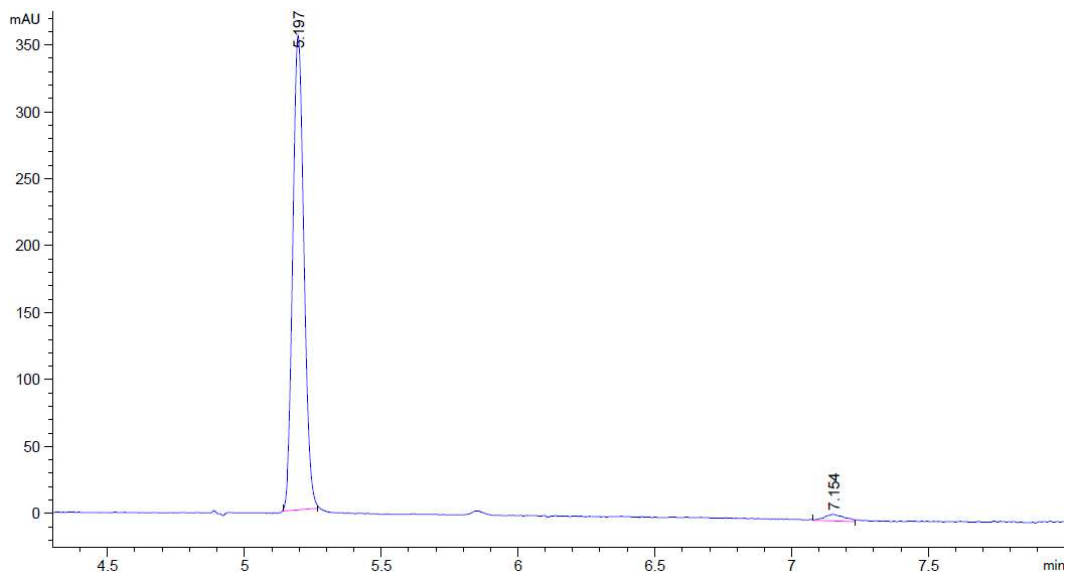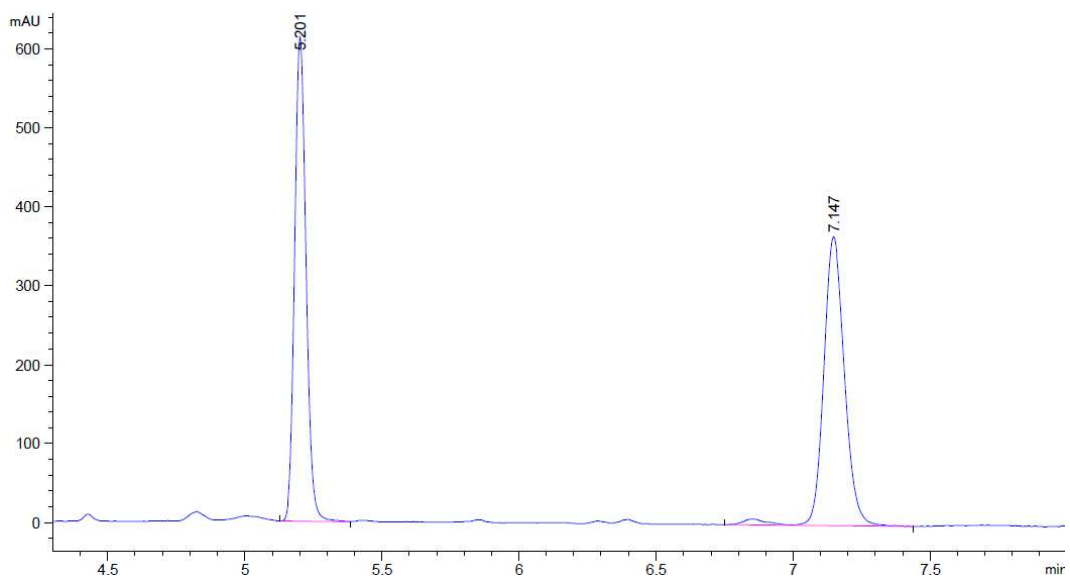

| Peak # | RetTime [min] | Type | Width [min] | Area [mAU*s] | Height [mAU] | Area %  |
|--------|---------------|------|-------------|--------------|--------------|---------|
| 1      | 5.197         | MM   | 0.0469      | 998.12708    | 354.61432    | 97.4998 |
| 2      | 7.154         | MM   | 0.0886      | 25.59502     | 4.81550      | 2.5002  |

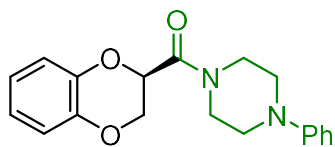

**6ad**

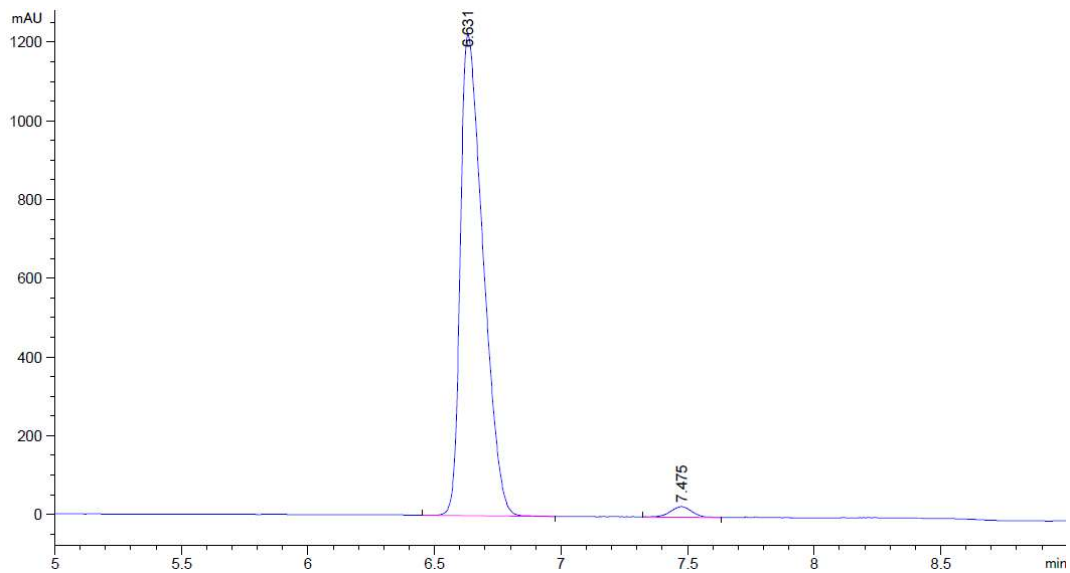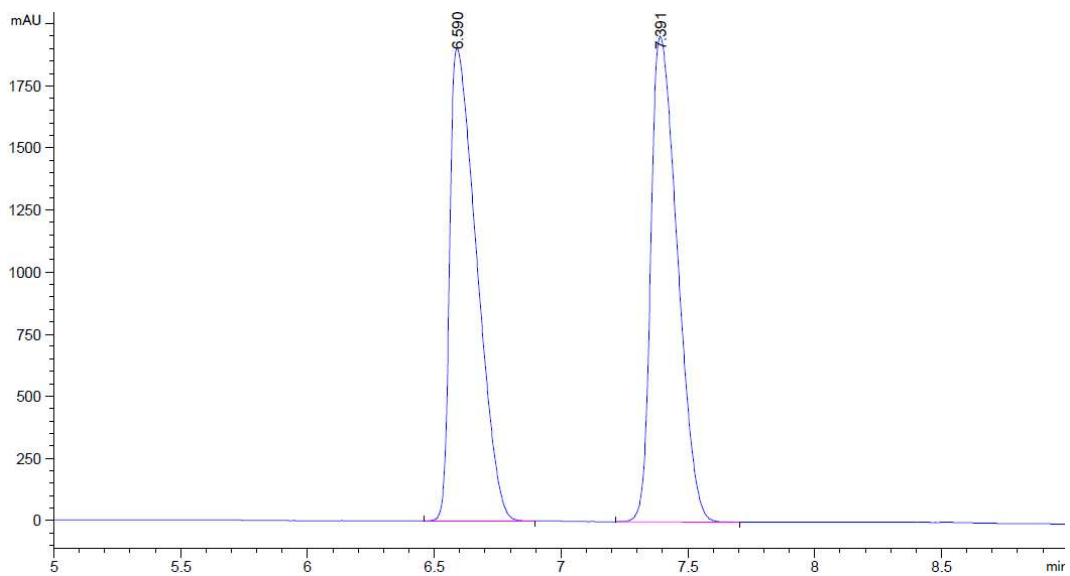

| Peak # | RetTime [min] | Type | Width [min] | Area [mAU*s] | Height [mAU] | Area %  |
|--------|---------------|------|-------------|--------------|--------------|---------|
| 1      | 6.631         | VV R | 0.0952      | 7620.18848   | 1222.85583   | 97.9781 |
| 2      | 7.475         | VB R | 0.0722      | 157.25119    | 27.09343     | 2.0219  |

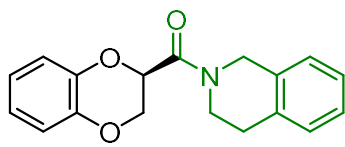

**6ae**

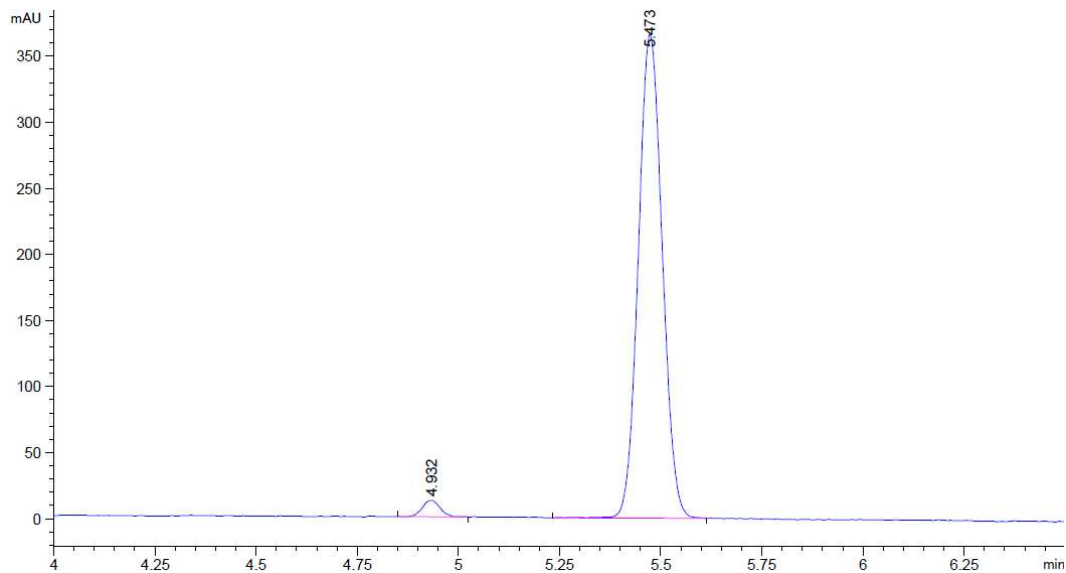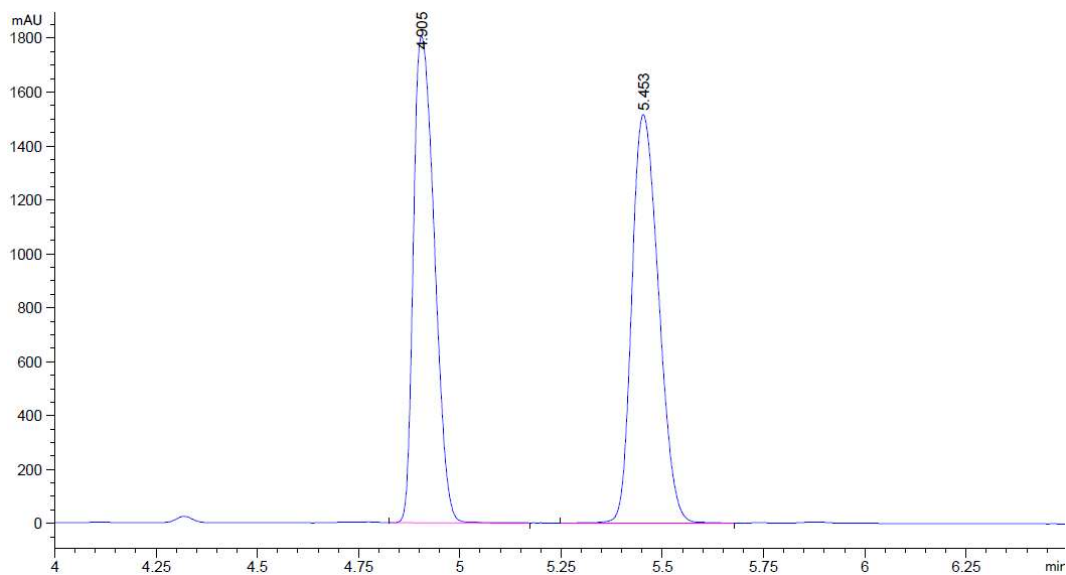

| Peak # | RetTime [min] | Type | Width [min] | Area [mAU*s] | Height [mAU] | Area %  |
|--------|---------------|------|-------------|--------------|--------------|---------|
| 1      | 4.932         | VV R | 0.0481      | 38.43156     | 12.59318     | 2.4863  |
| 2      | 5.473         | VB R | 0.0640      | 1507.27795   | 366.21469    | 97.5137 |

## VIII. Details of Computational Studies

Optimizations of intermediates and transition states were performed using Gaussian 09<sup>8</sup> software with spin-restricted DFT using PBE<sup>9</sup> functional and split basis set (6-31G(d) for C, P, O, H, Cl and LANL2DZ for Ir) in the gas phase. For all species, vibrational frequencies were also computed at the specified level of theory to obtain thermal Gibbs Free Energy corrections (at 298 K) and to characterize the stationary points as transition states (one and only one imaginary frequency) or minima (zero imaginary frequencies). Single point energy calculations were performed on optimized geometries in methanol solvent using the IEFPCM -solvation model<sup>10</sup>, PBE functional including Grimme dispersion correction D2<sup>11</sup>, and split basis set (6-311+G(d,p) for C, P, O, H, Cl and LANL2DZ (f) for Ir).<sup>12</sup> Obtained single-point energies were converted to the enthalpies and Gibbs free energies using corrections from gas-phase frequency analysis. Conformational analysis of the transition states was performed manually.

Example of the input file specifying basis set used in single-point:

```
# rpbe/pe/gen pseudo=read extrabasis empiricaldispersion=gd2 scrf=(iefpcm,solvent=methanol)
```

```
name
```

```
0 1
```

```
COORDINATES
```

```
C H O P Cl O
```

```
6-311G(d,p)
```

```
****
```

```
Ir 0
```

```
lanl2dz
```

```
****
```

```
Ir 0
```

```
F 1 1.0
```

```
0.938 1.0
```

```
****
```

```
Ir 0
```

```
Lanl2dz
```

---

<sup>8</sup> Gaussian 09, Revision D.01, M. J. Frisch, G. W. Trucks, H. B. Schlegel, G. E. Scuseria, M. A. Robb, J. R. Cheeseman, G. Scalmani, V. Barone, B. Mennucci, G. A. Petersson, H. Nakatsuji, M. Caricato, X. Li, H. P. Hratchian, A. F. Izmaylov, J. Bloino, G. Zheng, J. L. Sonnenberg, M. Hada, M. Ehara, K. Toyota, R. Fukuda, J. Hasegawa, M. Ishida, T. Nakajima, Y. Honda, O. Kitao, H. Nakai, T. Vreven, J. A. Montgomery, Jr., J. E. Peralta, F. Ogliaro, M. Bearpark, J. J. Heyd, E. Brothers, K. N. Kudin, V. N. Staroverov, T. Keith, R. Kobayashi, J. Normand, K. Raghavachari, A. Rendell, J. C. Burant, S. S. Iyengar, J. Tomasi, M. Cossi, N. Rega, J. M. Millam, M. Klene, J. E. Knox, J. B. Cross, V. Bakken, C. Adamo, J. Jaramillo, R. Gomperts, R. E. Stratmann, O. Yazyev, A. J. Austin, R. Cammi, C. Pomelli, J. W. Ochterski, R. L. Martin, K. Morokuma, V. G. Zakrzewski, G. A. Voth, P. Salvador, J. J. Dannenberg, S. Dapprich, A. D. Daniels, O. Farkas, J. B. Foresman, J. V. Ortiz, J. Cioslowski, and D. J. Fox, Gaussian, Inc., Wallingford CT, 2013.

<sup>9</sup> Perdew, J. P., Burke, K., Ernzerhof, M. *Phys. Rev. Lett.*, **1996**, *77*, 3865; <sup>9</sup> Perdew, J. P., Burke, K., Ernzerhof, M. *Phys. Rev. Lett.*, **1997**, *78*, 1396;

<sup>10</sup> Tomasi, J., Mennucci, B., Cammi, R. *Chem. Rev.*, 2005, *105*, 2999.

<sup>11</sup> Grimme, S. *J. Comp. Chem.*, **2006**, *27*, 1787.

<sup>12</sup> Hopmann, K. H. *Organometallics*, **2016**, *35*, 3795.

## Coordinates and thermochemical data for computed intermediates and transition states

Analysis of the isomeric Ir complexes identified the most stable complexes that likely define the selectivity of the protonation step. Out of six possible isomeric structures, diastereomers iso 1 and iso 3 are the most stable, with hydrogen coordinated at the equatorial position. When coordinated to the same orbital as the chloride (iso 2 and iso 4), dihydrogen undergoes addition to the metal center, resulting in the formation of Ir(V) intermediate. We focused on the analysis of the reactivity of the isomers 1 and 3.

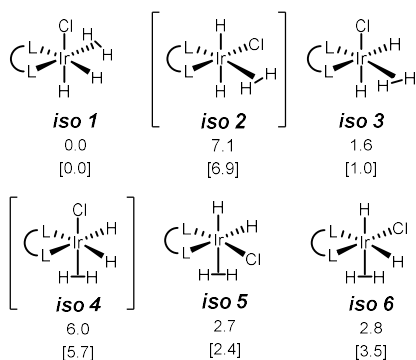

Relative free energies and enthalpies (in brackets), kcal/mol are shown.

### Iso1

|                                              |                             |
|----------------------------------------------|-----------------------------|
| Zero-point correction=                       | 0.635112 (Hartree/Particle) |
| Thermal correction to Energy=                | 0.676086                    |
| Thermal correction to Enthalpy=              | 0.677030                    |
| Thermal correction to Gibbs Free Energy=     | 0.563341                    |
| Sum of electronic and zero-point Energies=   | -2714.757921                |
| Sum of electronic and thermal Energies=      | -2714.716946                |
| Sum of electronic and thermal Enthalpies=    | -2714.716002                |
| Sum of electronic and thermal Free Energies= | -2714.829691                |
| Electronic energy                            | -2716.02587636              |

|   |             |             |             |
|---|-------------|-------------|-------------|
| C | -4.97105500 | -1.02666700 | -1.99393700 |
| C | -4.12141900 | -0.40318000 | -1.05496300 |
| C | -2.93341400 | -1.06956300 | -0.66467100 |
| C | -2.62294800 | -2.30717700 | -1.27026500 |
| C | -3.45465700 | -2.91404300 | -2.22097200 |
| C | -4.64008300 | -2.26084300 | -2.57057700 |
| H | -5.89007100 | -0.51152700 | -2.28919200 |
| H | -3.16993700 | -3.87642300 | -2.65450800 |
| H | -5.31196900 | -2.71598700 | -3.30527000 |
| O | -1.45658800 | -2.93633400 | -0.92090800 |
| C | -0.82851400 | -2.35091300 | 0.23871000  |
| P | -1.60557000 | -0.62933500 | 0.54218400  |
| C | -2.34218800 | -0.75238800 | 2.30353000  |
| C | -2.77698900 | 0.66861600  | 2.71777700  |
| H | -3.17884800 | 0.63154100  | 3.74771700  |
| H | -3.56701900 | 1.07440000  | 2.06441100  |
| H | -1.91256700 | 1.35488400  | 2.71538100  |
| C | -3.53087600 | -1.72634200 | 2.34844500  |
| H | -3.88870200 | -1.80899700 | 3.39162900  |
| H | -3.25450800 | -2.74205000 | 2.01239600  |

|    |             |             |             |
|----|-------------|-------------|-------------|
| H  | -4.37283500 | -1.38060300 | 1.72611100  |
| C  | -1.21623400 | -1.22180700 | 3.25046800  |
| H  | -0.33733600 | -0.55723200 | 3.19298400  |
| H  | -0.89319000 | -2.25851900 | 3.05373000  |
| H  | -1.60257200 | -1.19139400 | 4.28649400  |
| Ir | 0.01127700  | 0.99575300  | -0.08636100 |
| H  | -1.04088600 | -3.00652900 | 1.10326300  |
| H  | -0.64015100 | 2.64540400  | -0.01956600 |
| H  | -1.27141900 | 2.17451000  | 0.36636200  |
| H  | -0.53120100 | 0.92011400  | -1.60018400 |
| H  | 1.17538600  | 1.96468300  | -0.69691600 |
| C  | 0.68367100  | -2.35674600 | 0.01517600  |
| H  | 0.91398800  | -3.13047800 | -0.74314300 |
| C  | 2.85519600  | -1.00803600 | 0.62407700  |
| C  | 2.52840200  | -2.11837900 | 1.43243900  |
| C  | 4.10062800  | -0.35956400 | 0.81702700  |
| C  | 3.39191100  | -2.61247100 | 2.41785200  |
| C  | 4.97924500  | -0.87850000 | 1.79031900  |
| C  | 4.62583100  | -1.97858300 | 2.58501300  |
| H  | 3.09158600  | -3.47464600 | 3.01892100  |
| H  | 5.94275700  | -0.38201600 | 1.93841700  |
| H  | 5.32287100  | -2.34550700 | 3.34523800  |
| O  | 1.31781100  | -2.73920600 | 1.24780700  |
| C  | 2.00343400  | -0.97044200 | -2.32528900 |
| C  | 2.50642400  | 0.35865300  | -2.92024400 |
| H  | 2.76033000  | 0.19228100  | -3.98370400 |
| H  | 1.72743300  | 1.13569800  | -2.86445600 |
| H  | 3.40680500  | 0.73248800  | -2.40902800 |
| C  | 0.76679400  | -1.43944900 | -3.12081600 |
| H  | 0.38428700  | -2.41873000 | -2.78756200 |
| H  | -0.05701000 | -0.70890200 | -3.05432200 |
| H  | 1.05036700  | -1.53653900 | -4.18485800 |
| C  | 3.11519000  | -2.03513100 | -2.38119600 |
| H  | 3.37912400  | -2.21847300 | -3.43890500 |
| H  | 4.02481600  | -1.70282200 | -1.85526700 |
| H  | 2.80249000  | -3.00124700 | -1.94714100 |
| P  | 1.45717300  | -0.69077900 | -0.52183200 |
| Cl | 0.91800300  | 1.49221400  | 2.21237200  |
| C  | 4.54552700  | 0.83293400  | 0.04001300  |
| C  | 5.71125400  | 0.75781600  | -0.75270400 |
| C  | 3.85459000  | 2.05870800  | 0.13323800  |
| C  | 6.15920600  | 1.87670400  | -1.46848200 |
| H  | 6.25783900  | -0.19015500 | -0.81438300 |
| C  | 4.31308400  | 3.17654700  | -0.57866000 |
| H  | 2.97343200  | 2.12805800  | 0.78158600  |
| C  | 5.45728700  | 3.08905700  | -1.38569900 |
| H  | 7.05802000  | 1.80113000  | -2.08976500 |
| H  | 3.77121600  | 4.12452900  | -0.49428900 |
| H  | 5.80732500  | 3.96472900  | -1.94259800 |
| C  | -4.52202200 | 0.93822000  | -0.54038600 |
| C  | -3.73964400 | 2.07643700  | -0.82217300 |
| C  | -5.73070400 | 1.10166700  | 0.16828900  |
| C  | -4.14385600 | 3.34449000  | -0.38178900 |
| H  | -2.82027500 | 1.95623800  | -1.40361700 |
| C  | -6.13012600 | 2.36953800  | 0.61392200  |
| H  | -6.35069300 | 0.22328100  | 0.37854000  |
| C  | -5.33542800 | 3.49356200  | 0.34395700  |
| H  | -3.52957200 | 4.22101900  | -0.61465300 |
| H  | -7.06474500 | 2.47903100  | 1.17384800  |
| H  | -5.64785800 | 4.48386400  | 0.69068300  |

**Iso2**

Zero-point correction= 0.634963 (Hartree/Particle)  
 Thermal correction to Energy= 0.675850  
 Thermal correction to Enthalpy= 0.676794  
 Thermal correction to Gibbs Free Energy= 0.563421  
 Sum of electronic and zero-point Energies= -2714.750441  
 Sum of electronic and thermal Energies= -2714.709554  
 Sum of electronic and thermal Enthalpies= -2714.708610  
 Sum of electronic and thermal Free Energies= -2714.821983  
 Electronic energy -2716.01470181

|    |             |             |             |
|----|-------------|-------------|-------------|
| C  | 5.26197800  | -0.93266600 | 1.57989400  |
| C  | 4.32525200  | -0.37890400 | 0.67999900  |
| C  | 3.05039800  | -0.98935500 | 0.57973100  |
| C  | 2.75742800  | -2.10184300 | 1.40119000  |
| C  | 3.67925500  | -2.62910700 | 2.31305000  |
| C  | 4.94033800  | -2.03014900 | 2.39056800  |
| H  | 6.24972700  | -0.46806000 | 1.65384500  |
| H  | 3.40475300  | -3.49260500 | 2.92459500  |
| H  | 5.68434100  | -2.42545500 | 3.08943000  |
| O  | 1.51597000  | -2.68162200 | 1.30031100  |
| C  | 0.85124100  | -2.31032900 | 0.07587000  |
| P  | 1.53738500  | -0.59460600 | -0.39233200 |
| C  | 1.88605700  | -0.69120400 | -2.26225900 |
| C  | 2.29562300  | 0.70031000  | -2.78218500 |
| H  | 2.40326100  | 0.64456000  | -3.88125900 |
| H  | 3.25519600  | 1.03947800  | -2.36372200 |
| H  | 1.52607300  | 1.45461800  | -2.55101000 |
| C  | 2.99247200  | -1.71955600 | -2.55946500 |
| H  | 3.13326700  | -1.78271700 | -3.65421600 |
| H  | 2.73977000  | -2.73338400 | -2.20239800 |
| H  | 3.95541700  | -1.42608100 | -2.11073400 |
| C  | 0.56265200  | -1.10452400 | -2.93807700 |
| H  | -0.25640500 | -0.41511100 | -2.67212200 |
| H  | 0.25387500  | -2.13070600 | -2.67836900 |
| H  | 0.69518800  | -1.06395000 | -4.03469400 |
| Ir | 0.13665600  | 0.96251600  | 0.46992100  |
| H  | 1.11757500  | -3.05446700 | -0.70033000 |
| H  | 1.34332900  | 1.58015400  | 1.37177600  |
| H  | 0.88042800  | 2.17514700  | -0.31830100 |
| H  | 0.37970300  | 0.32227100  | 1.99137500  |
| C  | -0.65961100 | -2.39841800 | 0.31168300  |
| H  | -0.80631200 | -3.04010000 | 1.19915800  |
| C  | -2.70932900 | -1.15603800 | -0.81491000 |
| C  | -2.31935300 | -2.40229300 | -1.35916400 |
| C  | -3.84091600 | -0.49384000 | -1.37295100 |
| C  | -2.97820200 | -3.00601000 | -2.43778700 |
| C  | -4.49669400 | -1.11235400 | -2.46304200 |
| C  | -4.07316500 | -2.33844700 | -2.98997900 |
| H  | -2.62842300 | -3.97124700 | -2.81302900 |
| H  | -5.34897200 | -0.59518000 | -2.91247900 |
| H  | -4.60410200 | -2.77722200 | -3.84084200 |
| O  | -1.25140600 | -3.06828100 | -0.81648400 |
| C  | -2.55517600 | -1.05364800 | 2.20550500  |
| C  | -3.48890800 | 0.14663600  | 2.46168500  |
| H  | -3.94222800 | 0.02604400  | 3.46364100  |
| H  | -2.93758900 | 1.10168100  | 2.43788300  |
| H  | -4.30672900 | 0.19630500  | 1.72542200  |
| C  | -1.53444400 | -1.15891500 | 3.35460800  |
| H  | -0.76076800 | -1.92919500 | 3.18277900  |
| H  | -1.02844400 | -0.19512500 | 3.52545600  |
| H  | -2.07587900 | -1.42997700 | 4.27952700  |
| C  | -3.38452500 | -2.34750500 | 2.09440700  |
| H  | -3.97495000 | -2.46384100 | 3.02180100  |
| H  | -4.09120100 | -2.31119600 | 1.24866500  |
| H  | -2.76464300 | -3.25550000 | 1.98929400  |

|    |             |             |             |
|----|-------------|-------------|-------------|
| P  | -1.58190300 | -0.74361300 | 0.58693200  |
| C  | -4.42289900 | 0.78338600  | -0.87574000 |
| C  | -5.82548400 | 0.87245100  | -0.70484600 |
| C  | -3.63834400 | 1.92142100  | -0.60413300 |
| C  | -6.42106500 | 2.06288800  | -0.27314100 |
| H  | -6.44486900 | -0.01246700 | -0.88706500 |
| C  | -4.23849400 | 3.11362100  | -0.17509800 |
| H  | -2.55257800 | 1.88639700  | -0.71866600 |
| C  | -5.62757400 | 3.19100800  | -0.01027800 |
| H  | -7.50651200 | 2.10650100  | -0.13347000 |
| H  | -3.59883200 | 3.97304200  | 0.04487600  |
| H  | -6.09139900 | 4.12218000  | 0.33166300  |
| C  | 4.75229000  | 0.80564500  | -0.12091000 |
| C  | 4.11345300  | 2.05522400  | 0.01257900  |
| C  | 5.86317500  | 0.70057000  | -0.98617300 |
| C  | 4.56159000  | 3.16536100  | -0.71660200 |
| H  | 3.26533400  | 2.15734700  | 0.69390200  |
| C  | 6.30370200  | 1.80938600  | -1.72169600 |
| H  | 6.37298100  | -0.26405900 | -1.08705300 |
| C  | 5.65220200  | 3.04513600  | -1.59034400 |
| H  | 4.05406300  | 4.12801100  | -0.59648500 |
| H  | 7.15896400  | 1.70720200  | -2.39790900 |
| H  | 5.99734900  | 3.91229200  | -2.16274300 |
| H  | -0.57562600 | 1.31846000  | -0.99020300 |
| Cl | -1.13852600 | 2.77865100  | 1.54979800  |

**Iso3**

Zero-point correction= 0.635600 (Hartree/Particle)  
 Thermal correction to Energy= 0.676384  
 Thermal correction to Enthalpy= 0.677328  
 Thermal correction to Gibbs Free Energy= 0.564604  
 Sum of electronic and zero-point Energies= -2714.756637  
 Sum of electronic and thermal Energies= -2714.715853  
 Sum of electronic and thermal Enthalpies= -2714.714909  
 Sum of electronic and thermal Free Energies= -2714.827634  
 Electronic energy -2716.02465240

|    |             |             |             |
|----|-------------|-------------|-------------|
| C  | -5.00990400 | 0.59652400  | 1.96249500  |
| C  | -4.14810900 | 0.22491200  | 0.90887400  |
| C  | -2.91227200 | 0.90260800  | 0.77733200  |
| C  | -2.56611600 | 1.88145400  | 1.73370300  |
| C  | -3.40930800 | 2.22923600  | 2.79565000  |
| C  | -4.64223200 | 1.57678000  | 2.89483100  |
| H  | -5.96795800 | 0.07730000  | 2.06065200  |
| H  | -3.09741300 | 2.99780900  | 3.50767900  |
| H  | -5.32422000 | 1.83226600  | 3.71210600  |
| O  | -1.35314900 | 2.51514300  | 1.61426300  |
| C  | -0.75916400 | 2.31219000  | 0.31969100  |
| P  | -1.53364600 | 0.73405500  | -0.43236600 |
| C  | -2.14297600 | 1.29927300  | -2.15595300 |
| C  | -2.65537100 | 0.06071200  | -2.91794300 |
| H  | -2.94232900 | 0.36496600  | -3.94187300 |
| H  | -3.53697600 | -0.39476500 | -2.44049600 |
| H  | -1.86554600 | -0.70505900 | -3.00282100 |
| C  | -3.25591200 | 2.35471200  | -2.04231300 |
| H  | -3.56729100 | 2.66444500  | -3.05717800 |
| H  | -2.92282500 | 3.26347900  | -1.51019600 |
| H  | -4.14215700 | 1.95990000  | -1.51882300 |
| C  | -0.92624700 | 1.87099500  | -2.91204700 |
| H  | -0.10546300 | 1.13581800  | -2.96470900 |
| H  | -0.52905800 | 2.79311000  | -2.45574200 |
| H  | -1.23366400 | 2.11452200  | -3.94590300 |
| Ir | 0.09482500  | -0.98517400 | -0.25204000 |
| H  | -1.01058700 | 3.18486800  | -0.31421300 |
| H  | -0.46216700 | -2.52337200 | -0.94942300 |
| H  | -1.15704200 | -2.00125400 | -1.06079300 |



|    |             |             |             |    |             |             |             |
|----|-------------|-------------|-------------|----|-------------|-------------|-------------|
| H  | 1.32025000  | -2.04266100 | -0.04771100 | C  | -4.95994100 | -1.40019600 | -1.87227900 |
| C  | 0.75843500  | 2.28728400  | 0.48754300  | C  | -4.17694500 | -0.62297100 | -0.98913200 |
| H  | 1.01520000  | 2.84691700  | 1.40688300  | C  | -2.93177700 | -1.14367300 | -0.55347000 |
| C  | 2.87925300  | 1.14740000  | -0.57779300 | C  | -2.52230500 | -2.40636300 | -1.03692000 |
| C  | 2.51692400  | 2.42668200  | -1.05588500 | C  | -3.28961500 | -3.16433200 | -1.92968000 |
| C  | 4.10158400  | 0.57816400  | -1.01920600 | C  | -4.51981900 | -2.64403800 | -2.34335500 |
| C  | 3.31034600  | 3.15441300  | -1.95268000 | H  | -5.92144700 | -0.99779300 | -2.20504800 |
| C  | 4.90997800  | 1.32560100  | -1.90261200 | H  | -2.92533700 | -4.13861300 | -2.26636200 |
| C  | 4.51676400  | 2.58768600  | -2.37000300 | H  | -5.14455800 | -3.21584000 | -3.03689900 |
| H  | 2.98021000  | 4.14062600  | -2.28954200 | O  | -1.31739000 | -2.91030000 | -0.61420900 |
| H  | 5.85466400  | 0.88706300  | -2.23749800 | C  | -0.80364100 | -2.21019600 | 0.53821900  |
| H  | 5.16115900  | 3.13557200  | -3.06493600 | P  | -1.61040900 | -0.46809600 | 0.55009400  |
| O  | 1.33861100  | 2.98471200  | -0.63163600 | C  | -2.32373500 | -0.29544800 | 2.31935400  |
| C  | 2.25598800  | 0.39489900  | 2.32382200  | C  | -2.77782100 | 1.16740500  | 2.50035200  |
| C  | 2.72639800  | -1.05698100 | 2.54304000  | H  | -3.11929700 | 1.30410100  | 3.54354900  |
| H  | 3.10132000  | -1.14633300 | 3.57976400  | H  | -3.61284700 | 1.43286700  | 1.83367300  |
| H  | 1.88868400  | -1.76143100 | 2.41419100  | H  | -1.94100900 | 1.86217500  | 2.31889300  |
| H  | 3.54414200  | -1.33978800 | 1.86128800  | C  | -3.49732000 | -1.26380800 | 2.54396500  |
| C  | 1.11394500  | 0.71270900  | 3.31316500  | H  | -3.83581400 | -1.17498700 | 3.59323600  |
| H  | 0.77210500  | 1.75987100  | 3.25492900  | H  | -3.21345900 | -2.31842200 | 2.37747900  |
| H  | 0.25066600  | 0.04475100  | 3.15529700  | H  | -4.35499600 | -1.03424600 | 1.89093000  |
| H  | 1.49379000  | 0.54649800  | 4.33842900  | C  | -1.18763100 | -0.58886200 | 3.32320600  |
| C  | 3.42492500  | 1.37954200  | 2.51198600  | H  | -0.32488800 | 0.07845000  | 3.16332700  |
| H  | 3.76222200  | 1.32264600  | 3.56320800  | H  | -0.83814300 | -1.63395300 | 3.28528000  |
| H  | 4.28297700  | 1.13251600  | 1.86578100  | H  | -1.57694300 | -0.40810300 | 4.34286300  |
| H  | 3.13745600  | 2.42795700  | 2.31531500  | Ir | -0.03343700 | 1.04383200  | -0.44776500 |
| P  | 1.55569400  | 0.54859300  | 0.55962700  | H  | -1.10720100 | -2.77019700 | 1.44409100  |
| C  | 4.61198900  | -0.75851100 | -0.59369200 | H  | -0.92573200 | 2.36603400  | -0.11794300 |
| C  | 5.83581200  | -0.84597800 | 0.10481100  | H  | 0.99874900  | 2.04874900  | -1.19947900 |
| C  | 3.93883000  | -1.94781400 | -0.93760000 | C  | 0.72220000  | -2.25619100 | 0.44986700  |
| C  | 6.35607000  | -2.09169800 | 0.48139600  | H  | 0.99817800  | -3.18079400 | -0.09507600 |
| H  | 6.37178900  | 0.07428000  | 0.36263400  | C  | 2.86261900  | -0.81150700 | 0.91798600  |
| C  | 4.46436200  | -3.19278000 | -0.56456400 | C  | 2.44974100  | -1.70887500 | 1.92709500  |
| H  | 3.00092400  | -1.89155100 | -1.49581500 | C  | 4.10287600  | -0.13945100 | 1.05597600  |
| C  | 5.66852800  | -3.26898000 | 0.15065600  | C  | 3.22261200  | -1.96685000 | 3.06548100  |
| H  | 7.29941700  | -2.14181400 | 1.03522800  | C  | 4.89009800  | -0.42446100 | 2.19182300  |
| H  | 3.92668800  | -4.10721600 | -0.83572200 | C  | 4.45212900  | -1.31244300 | 3.18430100  |
| H  | 6.07252100  | -4.24284200 | 0.44592200  | H  | 2.86018600  | -2.67088400 | 3.81896800  |
| C  | -4.58712300 | -0.86284300 | -0.01228100 | H  | 5.84846100  | 0.09136900  | 2.30232500  |
| C  | -3.85869300 | -2.06804300 | -0.10028100 | H  | 5.07905900  | -1.49677200 | 4.06255200  |
| C  | -5.77255600 | -0.72013100 | -0.76419900 | O  | 1.24732300  | -2.35524400 | 1.78514700  |
| C  | -4.30125400 | -3.09568900 | -0.94585400 | C  | 2.27161500  | -1.44849900 | -2.02290100 |
| H  | -2.96740200 | -2.19836700 | 0.52701900  | C  | 2.84443100  | -0.27656300 | -2.84453700 |
| C  | -6.20481500 | -1.74742800 | -1.61504900 | H  | 3.14902200  | -0.65694300 | -3.83732400 |
| H  | -6.34733600 | 0.20965400  | -0.68708500 | H  | 2.09139000  | 0.51579100  | -2.99215000 |
| C  | -5.46692500 | -2.93691400 | -1.71120900 | H  | 3.72650300  | 0.17496700  | -2.36627700 |
| H  | -3.73702600 | -4.03356700 | -0.99471500 | C  | 1.11363300  | -2.09338200 | -2.81133000 |
| H  | -7.12023400 | -1.61844700 | -2.20226900 | H  | 0.65890200  | -2.95238200 | -2.29126900 |
| H  | -5.80611200 | -3.74151700 | -2.37213100 | H  | 0.31086900  | -1.36914000 | -3.03361000 |
| H  | 0.70964100  | -0.64937500 | -1.70243200 | H  | 1.51029000  | -2.45369100 | -3.77818800 |
| Cl | -0.83799500 | -1.88338600 | 1.90446400  | C  | 3.36628200  | -2.49381100 | -1.74076800 |

#### Iso4

Zero-point correction= 0.634931 (Hartree/Particle)  
Thermal correction to Energy= 0.675977  
Thermal correction to Enthalpy= 0.676921  
Thermal correction to Gibbs Free Energy= 0.563778  
Sum of electronic and zero-point Energies= -2714.751780  
Sum of electronic and thermal Energies= -2714.710734  
Sum of electronic and thermal Enthalpies= -2714.709790  
Sum of electronic and thermal Free Energies= -2714.822933  
Electronic energy -2716.01669581

|    |             |             |             |
|----|-------------|-------------|-------------|
| C  | -4.95994100 | -1.40019600 | -1.87227900 |
| C  | -4.17694500 | -0.62297100 | -0.98913200 |
| C  | -2.93177700 | -1.14367300 | -0.55347000 |
| C  | -2.52230500 | -2.40636300 | -1.03692000 |
| C  | -3.28961500 | -3.16433200 | -1.92968000 |
| C  | -4.51981900 | -2.64403800 | -2.34335500 |
| H  | -5.92144700 | -0.99779300 | -2.20504800 |
| H  | -2.92533700 | -4.13861300 | -2.26636200 |
| H  | -5.14455800 | -3.21584000 | -3.03689900 |
| O  | -1.31739000 | -2.91030000 | -0.61420900 |
| C  | -0.80364100 | -2.21019600 | 0.53821900  |
| P  | -1.61040900 | -0.46809600 | 0.55009400  |
| C  | -2.32373500 | -0.29544800 | 2.31935400  |
| C  | -2.77782100 | 1.16740500  | 2.50035200  |
| H  | -3.11929700 | 1.30410100  | 3.54354900  |
| H  | -3.61284700 | 1.43286700  | 1.83367300  |
| H  | -1.94100900 | 1.86217500  | 2.31889300  |
| C  | -3.49732000 | -1.26380800 | 2.54396500  |
| H  | -3.83581400 | -1.17498700 | 3.59323600  |
| H  | -3.21345900 | -2.31842200 | 2.37747900  |
| H  | -4.35499600 | -1.03424600 | 1.89093000  |
| C  | -1.18763100 | -0.58886200 | 3.32320600  |
| H  | -0.32488800 | 0.07845000  | 3.16332700  |
| H  | -0.83814300 | -1.63395300 | 3.28528000  |
| H  | -1.57694300 | -0.40810300 | 4.34286300  |
| Ir | -0.03343700 | 1.04383200  | -0.44776500 |
| H  | -1.10720100 | -2.77019700 | 1.44409100  |
| H  | -0.92573200 | 2.36603400  | -0.11794300 |
| H  | 0.99874900  | 2.04874900  | -1.19947900 |
| C  | 0.72220000  | -2.25619100 | 0.44986700  |
| H  | 0.99817800  | -3.18079400 | -0.09507600 |
| C  | 2.86261900  | -0.81150700 | 0.91798600  |
| C  | 2.44974100  | -1.70887500 | 1.92709500  |
| C  | 4.10287600  | -0.13945100 | 1.05597600  |
| C  | 3.22261200  | -1.96685000 | 3.06548100  |
| C  | 4.89009800  | -0.42446100 | 2.19182300  |
| C  | 4.45212900  | -1.31244300 | 3.18430100  |
| H  | 2.86018600  | -2.67088400 | 3.81896800  |
| H  | 5.84846100  | 0.09136900  | 2.30232500  |
| H  | 5.07905900  | -1.49677200 | 4.06255200  |
| O  | 1.24732300  | -2.35524400 | 1.78514700  |
| C  | 2.27161500  | -1.44849900 | -2.02290100 |
| C  | 2.84443100  | -0.27656300 | -2.84453700 |
| H  | 3.14902200  | -0.65694300 | -3.83732400 |
| H  | 2.09139000  | 0.51579100  | -2.99215000 |
| H  | 3.72650300  | 0.17496700  | -2.36627700 |
| C  | 1.11363300  | -2.09338200 | -2.81133000 |
| H  | 0.65890200  | -2.95238200 | -2.29126900 |
| H  | 0.31086900  | -1.36914000 | -3.03361000 |
| H  | 1.51029000  | -2.45369100 | -3.77818800 |
| C  | 3.36628200  | -2.49381100 | -1.74076800 |
| H  | 3.72953900  | -2.89893000 | -2.70326900 |
| H  | 4.22587000  | -2.05280100 | -1.21082700 |
| H  | 2.99402300  | -3.34511700 | -1.14363900 |
| P  | 1.57040600  | -0.75681700 | -0.38257500 |
| Cl | 0.90663600  | 1.84503900  | 1.69245200  |
| C  | 4.63548900  | 0.83112300  | 0.05793000  |
| C  | 5.89842600  | 0.60264600  | -0.53159300 |
| C  | 3.92467900  | 2.00210900  | -0.27792600 |
| C  | 6.42697800  | 1.50975600  | -1.46002200 |
| H  | 6.45699600  | -0.30280100 | -0.26839200 |
| C  | 4.46241900  | 2.90991100  | -1.20113700 |
| H  | 2.96251100  | 2.20351000  | 0.20440900  |
| C  | 5.70742200  | 2.66588400  | -1.79962100 |
| H  | 7.40170700  | 1.31221800  | -1.91872900 |
| H  | 3.90101600  | 3.81702500  | -1.44845400 |

|   |             |             |             |
|---|-------------|-------------|-------------|
| H | 6.11999400  | 3.37643500  | -2.52367100 |
| C | -4.73580000 | 0.69038000  | -0.55401100 |
| C | -4.06566300 | 1.90323600  | -0.81043900 |
| C | -5.99900200 | 0.73715100  | 0.07568800  |
| C | -4.63205400 | 3.12736100  | -0.42985800 |
| H | -3.09619300 | 1.88444200  | -1.31325200 |
| C | -6.56139400 | 1.96095400  | 0.46288300  |
| H | -6.53205400 | -0.19939200 | 0.27357700  |
| C | -5.87810300 | 3.16055200  | 0.21318400  |
| H | -4.09434600 | 4.05796400  | -0.63890900 |
| H | -7.53583700 | 1.97650000  | 0.96229900  |
| H | -6.31663900 | 4.11705300  | 0.51555500  |
| H | -0.18704200 | 0.24542400  | -1.85254100 |
| H | -1.04353500 | 1.58475200  | -1.57574300 |

|    |             |             |             |
|----|-------------|-------------|-------------|
| C  | -4.15480600 | -2.27420000 | -2.96534800 |
| H  | -2.74220800 | -3.93856200 | -2.82875700 |
| H  | -5.38424900 | -0.49963700 | -2.85029800 |
| H  | -4.71204800 | -2.69423100 | -3.80886800 |
| O  | -1.30968200 | -3.08593500 | -2.85477600 |
| C  | -2.54998200 | -1.14454300 | 2.20370500  |
| C  | -3.46802700 | 0.06297600  | 2.48385500  |
| H  | -3.92766000 | -0.06494900 | 3.48222600  |
| H  | -2.90509800 | 1.01252400  | 2.47504900  |
| H  | -4.28200900 | 0.13878000  | 1.74521700  |
| C  | -1.52279200 | -1.27582900 | 3.34493800  |
| H  | -0.75621900 | -2.04977300 | 3.15567100  |
| H  | -1.01155800 | -0.31632400 | 3.53032500  |
| H  | -2.05320300 | -1.55505300 | 4.27376600  |
| C  | -3.38656500 | -2.42982200 | 2.07571100  |
| H  | -3.96874600 | -2.57124000 | 3.00532600  |
| H  | -4.10074200 | -2.36950100 | 1.23761600  |
| H  | -2.76922600 | -3.33520400 | 1.93747400  |
| P  | -1.57033700 | -0.77197100 | 0.60227800  |
| C  | -4.38263400 | 0.84446100  | -0.83572800 |
| C  | -5.77794100 | 0.97597600  | -0.63622800 |
| C  | -3.56079100 | 1.96259000  | -0.59881100 |
| C  | -6.33000300 | 2.19006000  | -0.21258000 |
| H  | -6.42576800 | 0.10667900  | -0.79327200 |
| C  | -4.11643600 | 3.17877300  | -0.17757500 |
| H  | -2.47957000 | 1.89072800  | -0.73696200 |
| C  | -5.49915600 | 3.29903900  | 0.01369900  |
| H  | -7.41063300 | 2.26771800  | -0.05170000 |
| H  | -3.44843900 | 4.02298900  | 0.01473500  |
| H  | -5.92881400 | 4.24929500  | 0.34774000  |
| C  | 4.72189000  | 0.81427300  | -0.09413200 |
| C  | 4.09857300  | 2.05224100  | 0.16072400  |
| C  | 5.80167500  | 0.77074600  | -1.00276200 |
| C  | 4.52731600  | 3.21291600  | -0.49804800 |
| H  | 3.27302800  | 2.10419400  | 0.87496800  |
| C  | 6.22442600  | 1.93119600  | -1.66553900 |
| H  | 6.30062600  | -0.18559100 | -1.19520500 |
| C  | 5.58545400  | 3.15541000  | -1.41693000 |
| H  | 4.02871300  | 4.16478300  | -0.28864400 |
| H  | 7.05511500  | 1.87817900  | -2.37710300 |
| H  | 5.91532900  | 4.06247200  | -1.93380300 |
| H  | 0.56005400  | 0.39953700  | 2.24285700  |
| H  | 1.13539900  | 0.99234700  | 2.04851500  |
| Cl | -1.08719600 | 2.77738900  | 1.55420800  |
| H  | -0.40296600 | 1.35732800  | -0.93493800 |

### Iso5

|                                              |                             |             |             |
|----------------------------------------------|-----------------------------|-------------|-------------|
| Zero-point correction=                       | 0.635843 (Hartree/Particle) |             |             |
| Thermal correction to Energy=                | 0.676692                    |             |             |
| Thermal correction to Enthalpy=              | 0.677636                    |             |             |
| Thermal correction to Gibbs Free Energy=     | 0.564530                    |             |             |
| Sum of electronic and zero-point Energies=   | -2714.755468                |             |             |
| Sum of electronic and thermal Energies=      | -2714.714619                |             |             |
| Sum of electronic and thermal Enthalpies=    | -2714.713675                |             |             |
| Sum of electronic and thermal Free Energies= | -2714.826781                |             |             |
| Electronic energy                            | -2716.02269951              |             |             |
| C                                            | 5.27127000                  | -1.03293500 | 1.47105800  |
| C                                            | 4.31508600                  | -0.42788200 | 0.62646600  |
| C                                            | 3.04419500                  | -1.04434400 | 0.49882900  |
| C                                            | 2.77771600                  | -2.21632300 | 1.24387300  |
| C                                            | 3.71993500                  | -2.79701500 | 2.10196100  |
| C                                            | 4.97527500                  | -2.19056700 | 2.20447800  |
| H                                            | 6.25517300                  | -0.56325600 | 1.56235000  |
| H                                            | 3.46350300                  | -3.70570000 | 2.65295900  |
| H                                            | 5.73453300                  | -2.62643800 | 2.86162100  |
| O                                            | 1.54202300                  | -2.80142600 | 1.12681100  |
| C                                            | 0.83128100                  | -2.34157200 | -0.04347700 |
| P                                            | 1.51269100                  | -0.59880200 | -0.42757200 |
| C                                            | 1.82897800                  | -0.58464700 | -2.30378500 |
| C                                            | 2.24687600                  | 0.83511600  | -2.73395000 |
| H                                            | 2.31652900                  | 0.86116000  | -3.83728300 |
| H                                            | 3.22699100                  | 1.12244300  | -2.32378800 |
| H                                            | 1.50437800                  | 1.58484100  | -2.41482500 |
| C                                            | 2.91605600                  | -1.60442600 | -2.68813800 |
| H                                            | 3.04772600                  | -1.58907800 | -3.78576600 |
| H                                            | 2.64989400                  | -2.63785900 | -2.40403600 |
| H                                            | 3.88710900                  | -1.36011400 | -2.22718600 |
| C                                            | 0.48689600                  | -0.94234000 | -2.97638600 |
| H                                            | -0.31675200                 | -0.24986600 | -2.67238900 |
| H                                            | 0.16067700                  | -1.97219200 | -2.75240600 |
| H                                            | 0.60520200                  | -0.86171100 | -4.07252900 |
| Ir                                           | 0.14801600                  | 0.93565500  | 0.49904300  |
| H                                            | 1.05563100                  | -3.03720300 | -0.87508000 |
| H                                            | 1.22081500                  | 2.10081000  | 0.15798800  |
| C                                            | -0.66959700                 | -2.43043100 | 0.25533700  |
| H                                            | -0.77803400                 | -3.08703200 | 1.13736800  |
| C                                            | -2.72032400                 | -1.14008100 | -0.80277100 |
| C                                            | -2.37087900                 | -2.38896500 | -1.36925100 |
| C                                            | -3.84497200                 | -0.44928700 | -1.33956300 |
| C                                            | -3.06409000                 | -2.96909900 | -2.43954500 |
| C                                            | -4.53746900                 | -1.04260900 | -2.42136100 |

### Iso6

|                                              |                             |             |             |
|----------------------------------------------|-----------------------------|-------------|-------------|
| Zero-point correction=                       | 0.635463 (Hartree/Particle) |             |             |
| Thermal correction to Energy=                | 0.676662                    |             |             |
| Thermal correction to Enthalpy=              | 0.677606                    |             |             |
| Thermal correction to Gibbs Free Energy=     | 0.562726                    |             |             |
| Sum of electronic and zero-point Energies=   | -2714.755607                |             |             |
| Sum of electronic and thermal Energies=      | -2714.714408                |             |             |
| Sum of electronic and thermal Enthalpies=    | -2714.713464                |             |             |
| Sum of electronic and thermal Free Energies= | -2714.828344                |             |             |
| Electronic energy                            | -2716.02086309              |             |             |
| C                                            | -4.97706800                 | -1.39085300 | -1.85578500 |
| C                                            | -4.17928900                 | -0.66955200 | -0.93712500 |
| C                                            | -2.90227100                 | -1.19156100 | -0.59814700 |
| C                                            | -2.49300100                 | -2.40370100 | -1.20181500 |

|    |             |              |             |
|----|-------------|--------------|-------------|
| C  | -3.27782600 | -3.10294600  | -2.12576600 |
| C  | -4.53268000 | -2.57835300  | -2.44890200 |
| H  | -5.95639200 | -0.98169200  | -2.12065500 |
| H  | -2.90655000 | -4.03814200  | -2.55327700 |
| H  | -5.17192100 | -3.10180800  | -3.16702600 |
| O  | -1.26626800 | -2.92173300  | -0.86874600 |
| C  | -0.72587900 | -2.32010100  | 0.32359300  |
| P  | -1.53297500 | -0.58357200  | 0.49800900  |
| C  | -2.13856600 | -0.55921000  | 2.31309900  |
| C  | -2.73117900 | 0.83249300   | 2.61429800  |
| H  | -2.89789600 | 0.91407500   | 3.70495200  |
| H  | -3.69841800 | 0.98622600   | 2.11244600  |
| H  | -2.05279300 | 1.64425600   | 2.30094100  |
| C  | -3.18638600 | -1.65334800  | 2.57747400  |
| H  | -3.49055700 | -1.60742200  | 3.63975200  |
| H  | -2.80165900 | -2.67179100  | 2.39108100  |
| H  | -4.08918100 | -1.50891900  | 1.96126300  |
| C  | -0.89503200 | -0.77004000  | 3.20204200  |
| H  | -0.13553800 | 0.00956400   | 3.02305300  |
| H  | -0.41873800 | -1.75462300  | 3.05895200  |
| H  | -1.20666200 | -0.69994100  | 4.26055200  |
| Ir | 0.16366200  | 0.98315100   | -0.23779000 |
| H  | -1.01168700 | -2.94917700  | 1.18954600  |
| C  | 0.79319600  | -2.36647100  | 0.18901900  |
| H  | 1.04334100  | -3.19640500  | -0.49919900 |
| C  | 2.91702700  | -0.96171400  | 0.84650300  |
| C  | 2.54213800  | -2.01915400  | 1.70586300  |
| C  | 4.13661400  | -0.28133200  | 1.10107100  |
| C  | 3.32365900  | -2.42661400  | 2.79496000  |
| C  | 4.93307800  | -0.711172900 | 2.18417900  |
| C  | 4.52995900  | -1.76043700  | 3.02271400  |
| H  | 2.98314100  | -3.25188700  | 3.42587400  |
| H  | 5.87520500  | -0.18937400  | 2.37499500  |
| H  | 5.16463600  | -2.06055900  | 3.86262100  |
| O  | 1.36041400  | -2.67638900  | 1.47540400  |
| C  | 2.31414500  | -1.20746800  | -2.14151000 |
| C  | 2.94800800  | 0.04757500   | -2.77530200 |
| H  | 3.27025600  | -0.19883300  | -3.80419700 |
| H  | 2.23008300  | 0.88238200   | -2.83099000 |
| H  | 3.83081600  | 0.39591100   | -2.21736500 |
| C  | 1.13950800  | -1.68028400  | -3.02393100 |
| H  | 0.63661200  | -2.57910000  | -2.62998000 |
| H  | 0.37655400  | -0.89353500  | -3.14477100 |
| H  | 1.52866300  | -1.92526100  | -4.02919100 |
| C  | 3.36984900  | -2.32083700  | -2.01290900 |
| H  | 3.75619400  | -2.56613900  | -3.01934000 |
| H  | 4.22232100  | -2.00483400  | -1.38956800 |
| H  | 2.95929300  | -3.25230200  | -1.58494200 |
| P  | 1.59947800  | -0.74806700  | -0.43056100 |
| C  | 4.65471800  | 0.85878000   | 0.28878000  |
| C  | 5.88315300  | 0.72639200   | -0.39460500 |
| C  | 3.98497700  | 2.09796600   | 0.25212300  |
| C  | 6.41095500  | 1.79820900   | -1.12767600 |
| H  | 6.41647200  | -0.23005600  | -0.35603500 |
| C  | 4.51765000  | 3.17003600   | -0.47762900 |
| H  | 3.04687300  | 2.21943800   | 0.79907900  |
| C  | 5.72611000  | 3.02206000   | -1.17422200 |
| H  | 7.35910800  | 1.67678200   | -1.66208000 |
| H  | 3.98234700  | 4.12482900   | -0.49639700 |
| H  | 6.13766300  | 3.86028500   | -1.74598900 |
| C  | -4.75453600 | 0.58486300   | -0.37991300 |
| C  | -4.05620800 | 1.80585600   | -0.43749700 |
| C  | -6.05588300 | 0.57094500   | 0.17253200  |
| C  | -4.63916100 | 2.98307400   | 0.05086800  |
| H  | -3.04372500 | 1.85169700   | -0.84705600 |
| C  | -6.63474900 | 1.74768800   | 0.66402000  |

|    |             |             |             |
|----|-------------|-------------|-------------|
| H  | -6.60296000 | -0.37649100 | 0.23196600  |
| C  | -5.92783700 | 2.95937100  | 0.60164300  |
| H  | -4.06367000 | 3.91251800  | 0.00602800  |
| H  | -7.63843400 | 1.71708100  | 1.10138700  |
| H  | -6.38014400 | 3.87940100  | 0.98660300  |
| H  | -0.07627800 | 1.30097100  | -2.03978600 |
| H  | -0.75259700 | 0.82863700  | -1.86493000 |
| H  | 0.69351500  | 1.14401400  | 1.25459900  |
| Cl | -0.99802000 | 3.10498400  | 0.15188700  |
| H  | 1.39318800  | 1.98482100  | -0.57244900 |

### Formation of the active catalyst:

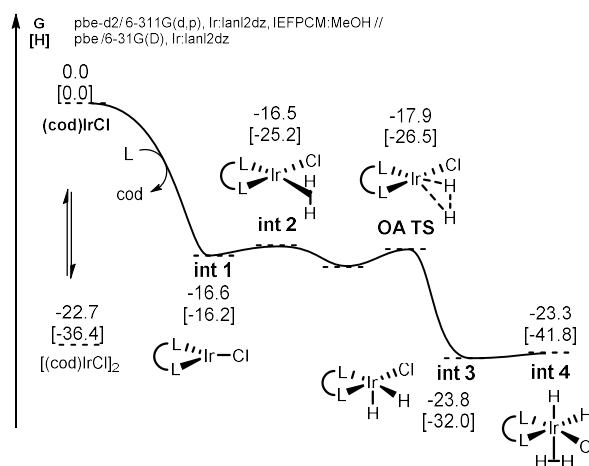

Formation of isomer 5 (int 4 on the diagram) is shown here as an example; Using relative energies of the other isomers, one can estimate thermochemistry of their formation.

### [(cod)IrCl]<sub>2</sub>

|                                              |                |                    |             |
|----------------------------------------------|----------------|--------------------|-------------|
| Zero-point correction=                       | 0.362136       | (Hartree/Particle) |             |
| Thermal correction to Energy=                | 0.383354       |                    |             |
| Thermal correction to Enthalpy=              | 0.384298       |                    |             |
| Thermal correction to Gibbs Free Energy=     | 0.311515       |                    |             |
| Sum of electronic and zero-point Energies=   | -1752.503706   |                    |             |
| Sum of electronic and thermal Energies=      | -1752.482488   |                    |             |
| Sum of electronic and thermal Enthalpies=    | -1752.481543   |                    |             |
| Sum of electronic and thermal Free Energies= | -1752.554327   |                    |             |
| Electronic energy                            | -1753.19669720 |                    |             |
| C                                            | 4.42244300     | -0.34707500        | -0.68969000 |
| H                                            | 4.64920600     | -1.42804900        | -0.68614700 |
| H                                            | 5.22270600     | 0.13709700         | -1.28679800 |
| C                                            | 2.76745000     | 2.34288600         | -0.70827600 |
| H                                            | 3.87071200     | 2.38583500         | -0.71687300 |
| H                                            | 2.42502300     | 3.20220700         | -1.31063700 |
| C                                            | 2.06086300     | 1.11396800         | 1.40230400  |
| H                                            | 1.33999000     | 1.11182300         | 2.23348000  |
| C                                            | 3.03676300     | 0.05129900         | 1.40552500  |
| H                                            | 2.96838000     | -0.66294800        | 2.23873100  |
| C                                            | 3.06988000     | -0.17355000        | -1.36404000 |
| H                                            | 2.89742700     | -0.85940000        | -2.20744400 |
| C                                            | 2.29280800     | 1.04167300         | -1.35836100 |
| H                                            | 1.57995300     | 1.16451300         | -2.18628600 |
| C                                            | 4.42373200     | 0.17369700         | 0.76783700  |
| H                                            | 4.76278500     | 1.22401900         | 0.80981800  |
| H                                            | 5.15140600     | -0.40361300        | 1.36370100  |
| C                                            | 2.22399500     | 2.46857600         | 0.73213700  |
| H                                            | 1.22200500     | 2.93413100         | 0.69937500  |

|    |             |             |             |
|----|-------------|-------------|-------------|
| H  | 2.86165700  | 3.13922000  | 1.34429700  |
| Ir | 1.49397500  | -0.36208000 | 0.01502600  |
| Cl | 0.01643600  | -1.41745100 | -1.65525700 |
| Cl | -0.01629700 | -1.41725000 | 1.65528800  |
| Ir | -1.49399800 | -0.36199900 | -0.01507600 |
| C  | -3.06966000 | -0.17345000 | 1.36419500  |
| C  | -2.29259100 | 1.04181600  | 1.35822700  |
| C  | -2.06121600 | 1.11378000  | -1.40258000 |
| C  | -3.03707800 | 0.05107500  | -1.40533300 |
| H  | -2.89700700 | -0.85910600 | 2.20772100  |
| C  | -4.42227100 | -0.34731300 | 0.69009100  |
| H  | -1.57972500 | 1.16472200  | 2.18614300  |
| C  | -2.76722700 | 2.34303600  | 0.70811600  |
| C  | -2.22414200 | 2.46845100  | -0.73246300 |
| H  | -1.34055700 | 1.11153400  | -2.23394000 |
| C  | -4.42391100 | 0.17364300  | -0.76732900 |
| H  | -2.96887600 | -0.66332700 | -2.23842700 |
| H  | -4.64864300 | -1.42837600 | 0.68641700  |
| H  | -5.22263700 | 0.13647500  | 1.28737600  |
| H  | -3.87048100 | 2.38622400  | 0.71709500  |
| H  | -2.42439200 | 3.20235700  | 1.31023900  |
| H  | -1.22209200 | 2.93391000  | -0.69999200 |
| H  | -2.86186600 | 3.13911500  | -1.34453700 |
| H  | -4.76275500 | 1.22404000  | -0.80905200 |
| H  | -5.15183400 | -0.40344300 | -1.36310400 |

#### [(cod)IrCl]

|                                              |                             |
|----------------------------------------------|-----------------------------|
| Zero-point correction=                       | 0.180027 (Hartree/Particle) |
| Thermal correction to Energy=                | 0.189933                    |
| Thermal correction to Enthalpy=              | 0.190877                    |
| Thermal correction to Gibbs Free Energy=     | 0.143506                    |
| Sum of electronic and zero-point Energies=   | -876.212259                 |
| Sum of electronic and thermal Energies=      | -876.202352                 |
| Sum of electronic and thermal Enthalpies=    | -876.201408                 |
| Sum of electronic and thermal Free Energies= | -876.248779                 |
| Electronic energy                            | -876.56803677               |

|    |             |             |             |
|----|-------------|-------------|-------------|
| Cl | -2.71119700 | 0.13362100  | 0.38355300  |
| Ir | -0.49803300 | -0.14281000 | -0.28110000 |
| C  | 1.24817500  | -1.19440000 | -0.82025000 |
| C  | 1.33217000  | 0.14267300  | -1.34357600 |
| C  | 0.32056400  | 1.30692900  | 0.94185600  |
| C  | 0.47691500  | -0.02075700 | 1.54437100  |
| H  | 0.97985100  | -1.98578700 | -1.54077700 |
| C  | 2.00252800  | -1.69760100 | 0.40471100  |
| H  | 1.10474600  | 0.26840100  | -2.41327600 |
| C  | 2.22511900  | 1.22717500  | -0.73545600 |
| C  | 1.43155500  | 2.09325700  | 0.27186400  |
| H  | -0.48484000 | 1.93035900  | 1.36032700  |
| C  | 1.81577800  | -0.76093700 | 1.62194900  |
| H  | -0.23786100 | -0.26585900 | 2.34414300  |
| H  | 1.60107900  | -2.69584000 | 0.65247300  |
| H  | 3.07807800  | -1.84148500 | 0.17800900  |
| H  | 3.10155200  | 0.76416900  | -0.24865300 |
| H  | 2.62758700  | 1.86833100  | -1.53813000 |
| H  | 0.95880100  | 2.93831700  | -0.25912200 |
| H  | 2.10012400  | 2.54152000  | 1.03558100  |
| H  | 2.63824900  | -0.02652400 | 1.68635800  |
| H  | 1.85469200  | -1.34880400 | 2.55452100  |

#### L

|                                              |                             |
|----------------------------------------------|-----------------------------|
| Zero-point correction=                       | 0.598749 (Hartree/Particle) |
| Thermal correction to Energy=                | 0.635265                    |
| Thermal correction to Enthalpy=              | 0.636210                    |
| Thermal correction to Gibbs Free Energy=     | 0.530311                    |
| Sum of electronic and zero-point Energies=   | -2147.642174                |
| Sum of electronic and thermal Energies=      | -2147.605657                |
| Sum of electronic and thermal Enthalpies=    | -2147.604713                |
| Sum of electronic and thermal Free Energies= | -2147.710611                |
| Electronic energy                            | -2148.74009364              |

|   |             |             |             |
|---|-------------|-------------|-------------|
| C | -3.10573000 | -2.69799300 | 1.05540500  |
| C | -3.32286000 | -1.44506300 | 0.43742700  |
| C | -2.33818400 | -0.43958400 | 0.59628900  |
| C | -1.16290700 | -0.73385800 | 1.32197800  |
| C | -0.94497600 | -1.97888000 | 1.92579900  |
| C | -1.93843700 | -2.95529300 | 1.78679100  |
| H | -3.85070400 | -3.48835500 | 0.92213400  |
| H | -0.01802100 | -2.16619900 | 2.47406200  |
| H | -1.78958900 | -3.94139800 | 2.23879600  |
| O | -0.22456200 | 0.25532500  | 1.45408900  |
| C | -0.49763100 | 1.38306700  | 0.58310000  |
| P | -2.31054300 | 1.30533400  | -0.00066200 |
| C | -3.19913200 | 2.26597900  | 1.41595200  |
| C | -4.70898000 | 2.02174900  | 1.22554400  |
| H | -5.27902500 | 2.63710200  | 1.94757100  |
| H | -4.97685700 | 0.96608700  | 1.39792600  |
| H | -5.04539100 | 2.29265300  | 0.20952100  |
| C | -2.77842600 | 1.85434600  | 2.83476300  |
| H | -3.34974000 | 2.44200200  | 3.57899000  |
| H | -1.70618500 | 2.03314300  | 3.02447600  |
| H | -2.98134800 | 0.78658800  | 3.02112000  |
| C | -2.89022700 | 3.75627400  | 1.17188300  |
| H | -3.18368900 | 4.07270700  | 0.15531100  |
| H | -1.81869700 | 3.99103700  | 1.30646100  |
| H | -3.45204300 | 4.37730300  | 1.89472400  |
| H | -0.32432700 | 2.29882800  | 1.17740300  |
| C | 0.49764500  | 1.38310800  | -0.58305700 |
| H | 0.32433500  | 2.29890500  | -1.17730300 |
| C | 2.33820600  | -0.43953400 | -0.59633100 |
| C | 1.16293800  | -0.73377100 | -1.32205100 |
| C | 3.32287300  | -1.44502700 | -0.43749600 |
| C | 0.94501300  | -1.97876100 | -1.92593700 |
| C | 3.10574700  | -2.69792600 | -1.05553900 |
| C | 1.93846800  | -2.95518600 | -1.78696000 |
| H | 0.01806400  | -2.16605200 | -2.47422000 |
| H | 3.85071400  | -3.48829900 | -0.92229000 |
| H | 1.78962300  | -3.94126800 | -2.23901300 |
| O | 0.22459100  | 0.25541800  | -1.45411600 |
| C | 3.19913300  | 2.26607300  | -1.41587500 |
| C | 4.70900800  | 2.02217400  | -1.22525600 |
| H | 5.27901600  | 2.63760200  | -1.94724800 |
| H | 5.04522900  | 2.29321300  | -0.20920700 |
| H | 4.97713100  | 0.96655800  | -1.39753600 |
| C | 2.88988200  | 3.75632000  | -1.17196000 |
| H | 1.81831500  | 3.99084000  | -1.30667400 |
| H | 3.18316100  | 4.07289800  | -0.15538100 |
| H | 3.45164300  | 4.37741300  | -1.89478900 |
| C | 2.77869500  | 1.85424500  | -2.83470900 |
| H | 3.34998300  | 2.44196400  | -3.57890600 |
| H | 2.98186500  | 0.78651500  | -3.02096100 |
| H | 1.70644300  | 2.03280400  | -3.02457700 |
| P | 2.31055700  | 1.30535800  | 0.00070000  |
| C | 4.56739400  | -1.24087200 | 0.35493100  |
| C | 5.81211600  | -1.67348800 | -0.15269100 |

|   |             |             |             |
|---|-------------|-------------|-------------|
| C | 4.53580400  | -0.65320900 | 1.63832200  |
| C | 6.98854600  | -1.51249000 | 0.59049200  |
| H | 5.85357800  | -2.12063200 | -1.15185600 |
| C | 5.71237600  | -0.49533600 | 2.38164100  |
| H | 3.57761300  | -0.33464000 | 2.05930800  |
| C | 6.94353900  | -0.92056000 | 1.86086600  |
| H | 7.94420500  | -1.84603500 | 0.17223400  |
| H | 5.66461400  | -0.04396400 | 3.37832400  |
| H | 7.86221500  | -0.79333700 | 2.44292200  |
| C | -4.56740000 | -1.24085600 | -0.35495700 |
| C | -4.53583800 | -0.65312700 | -1.63831900 |
| C | -5.81211400 | -1.67348000 | 0.15267800  |
| C | -5.71242800 | -0.49520200 | -2.38159800 |
| H | -3.57765500 | -0.33454900 | -2.05931500 |
| C | -6.98856300 | -1.51242900 | -0.59046400 |
| H | -5.85355400 | -2.12067300 | 1.15182300  |
| C | -6.94358300 | -0.92043600 | -1.86081000 |
| H | -5.66468900 | -0.04377900 | -3.37825800 |
| H | -7.94421400 | -1.84598200 | -0.17219600 |
| H | -7.86227300 | -0.79317100 | -2.44283400 |

### cod

|                                              |                             |
|----------------------------------------------|-----------------------------|
| Zero-point correction=                       | 0.176198 (Hartree/Particle) |
| Thermal correction to Energy=                | 0.183843                    |
| Thermal correction to Enthalpy=              | 0.184787                    |
| Thermal correction to Gibbs Free Energy=     | 0.144486                    |
| Sum of electronic and zero-point Energies=   | -311.416010                 |
| Sum of electronic and thermal Energies=      | -311.408365                 |
| Sum of electronic and thermal Enthalpies=    | -311.407421                 |
| Sum of electronic and thermal Free Energies= | -311.447722                 |
| Electronic energy                            | -311.69286879               |

|   |             |             |             |
|---|-------------|-------------|-------------|
| C | -1.92767400 | 0.01050900  | 0.02778400  |
| H | -2.43555800 | -0.43399400 | 0.90734200  |
| H | -2.75358100 | 0.31661600  | -0.64901500 |
| C | 1.10003700  | 1.09375700  | -0.66895700 |
| H | 0.67520900  | 0.70507400  | -1.60800200 |
| H | 1.80231700  | 1.89185600  | -0.97172200 |
| C | 1.20354100  | -1.24787300 | 0.49740800  |
| H | 1.80427100  | -1.86657700 | 1.18009300  |
| C | -0.03267200 | -1.70534600 | 0.21467900  |
| H | -0.33003600 | -2.63758600 | 0.71488100  |
| C | -1.20340800 | 1.24792600  | 0.49749200  |
| H | -1.80411100 | 1.86667600  | 1.18019400  |
| C | 0.03275200  | 1.70543700  | 0.21456800  |
| H | 0.33015900  | 2.63767600  | 0.71473400  |
| C | -1.10026400 | -1.09405400 | -0.66877500 |
| H | -0.67580300 | -0.70574100 | -1.60808000 |
| H | -1.80259500 | -1.89228100 | -0.97098100 |
| C | 1.92777200  | -0.01036500 | 0.02779600  |
| H | 2.43532200  | 0.43447900  | 0.90739000  |
| H | 2.75390900  | -0.31614500 | -0.64880500 |

### Int 1

|                                            |                             |
|--------------------------------------------|-----------------------------|
| Zero-point correction=                     | 0.601839 (Hartree/Particle) |
| Thermal correction to Energy=              | 0.641737                    |
| Thermal correction to Enthalpy=            | 0.642681                    |
| Thermal correction to Gibbs Free Energy=   | 0.529018                    |
| Sum of electronic and zero-point Energies= | -2712.429732                |
| Sum of electronic and thermal Energies=    | -2712.389833                |

|                                              |                |
|----------------------------------------------|----------------|
| Sum of electronic and thermal Enthalpies=    | -2712.388889   |
| Sum of electronic and thermal Free Energies= | -2712.502553   |
| Electronic energy                            | -2713.64138941 |

|    |             |             |             |
|----|-------------|-------------|-------------|
| C  | -5.16730000 | -1.30454500 | -0.94564200 |
| C  | -4.07428200 | -0.57462000 | -0.42930000 |
| C  | -2.88122800 | -1.27958000 | -0.12725000 |
| C  | -2.81705300 | -2.66954000 | -0.36895000 |
| C  | -3.90217700 | -3.38736100 | -0.89089600 |
| C  | -5.07883700 | -2.68558700 | -1.17282900 |
| H  | -6.08476600 | -0.76636700 | -1.20174900 |
| H  | -3.81065100 | -4.46355500 | -1.06022400 |
| H  | -5.93874000 | -3.22191200 | -1.58697700 |
| O  | -1.66682900 | -3.34867500 | -0.05153700 |
| C  | -0.60125900 | -2.47629100 | 0.38138900  |
| P  | -1.30368500 | -0.72705000 | 0.64158300  |
| C  | -1.62278300 | -0.60358600 | 2.52312800  |
| C  | -2.27333100 | 0.76526200  | 2.80386800  |
| H  | -2.40067800 | 0.88899400  | 3.89570500  |
| H  | -3.26491100 | 0.86334900  | 2.33257500  |
| H  | -1.63470600 | 1.58905000  | 2.43871200  |
| C  | -2.53222700 | -1.74567300 | 3.00647300  |
| H  | -2.66891300 | -1.66294800 | 4.10089900  |
| H  | -2.10293000 | -2.74260500 | 2.80215200  |
| H  | -3.52887300 | -1.70177500 | 2.53669600  |
| C  | -0.25120600 | -0.65924800 | 3.22363500  |
| H  | 0.41339400  | 0.14055400  | 2.85506700  |
| H  | 0.26424100  | -1.62591500 | 3.08342400  |
| H  | -0.39370900 | -0.51973300 | 4.31152800  |
| Ir | -0.09534300 | 0.87987700  | -0.26484200 |
| H  | -0.21250600 | -2.88555000 | 1.32925900  |
| C  | 0.54569600  | -2.45339500 | -0.63737400 |
| H  | 0.16603600  | -2.78578100 | -1.61764400 |
| C  | 2.72202200  | -1.30547500 | 0.26781100  |
| C  | 2.63915000  | -2.71649800 | 0.35730900  |
| C  | 3.84303500  | -0.64558500 | 0.84293100  |
| C  | 3.61300700  | -3.49354800 | 0.99819600  |
| C  | 4.81677300  | -1.43934900 | 1.49261800  |
| C  | 4.70493200  | -2.83367800 | 1.56826000  |
| H  | 3.49812300  | -4.58005700 | 1.03721400  |
| H  | 5.66251900  | -0.93714100 | 1.97088600  |
| H  | 5.47541000  | -3.41202600 | 2.08840200  |
| O  | 1.58858600  | -3.36688600 | -0.24598000 |
| C  | 1.98768600  | -0.57619900 | -2.55074000 |
| C  | 2.86589100  | 0.68652400  | -2.64065900 |
| H  | 3.22002800  | 0.79889000  | -3.68245000 |
| H  | 2.30460600  | 1.59588800  | -2.36841500 |
| H  | 3.75221700  | 0.61744900  | -1.98817000 |
| C  | 0.77727300  | -0.44421700 | -3.49474600 |
| H  | 0.12197000  | -1.33325200 | -3.46611400 |
| H  | 0.16656200  | 0.43722200  | -3.23635300 |
| H  | 1.14078900  | -0.33243900 | -4.53344100 |
| C  | 2.81985800  | -1.82373700 | -2.90425800 |
| H  | 3.18324000  | -1.71830500 | -3.94323400 |
| H  | 3.70097900  | -1.92958900 | -2.24992600 |
| H  | 2.23518400  | -2.75803100 | -2.85084200 |
| P  | 1.30715100  | -0.70969600 | -0.76969200 |
| C  | 4.07179000  | 0.82452000  | 0.79935600  |
| C  | 5.36540100  | 1.31651400  | 0.50488600  |
| C  | 3.04975400  | 1.75183600  | 1.08493300  |
| C  | 5.62368700  | 2.69200600  | 0.49238200  |
| H  | 6.16498300  | 0.60954000  | 0.25829200  |
| C  | 3.30988500  | 3.12846400  | 1.07089400  |
| H  | 2.03341000  | 1.39661300  | 1.30018200  |
| C  | 4.59548400  | 3.60378500  | 0.77843600  |
| H  | 6.62861400  | 3.05276300  | 0.24870700  |

|    |             |            |             |
|----|-------------|------------|-------------|
| H  | 2.49189700  | 3.82640700 | 1.27281200  |
| H  | 4.79489200  | 4.68037200 | 0.76367300  |
| C  | -4.22057400 | 0.88962300 | -0.21736900 |
| C  | -3.24583500 | 1.80153000 | -0.67707900 |
| C  | -5.36533000 | 1.39998500 | 0.43463600  |
| C  | -3.39232200 | 3.17895700 | -0.46285400 |
| H  | -2.37591300 | 1.42716800 | -1.23966500 |
| C  | -5.51402900 | 2.77735100 | 0.64333000  |
| H  | -6.12659100 | 0.70377500 | 0.80335800  |
| C  | -4.52610200 | 3.67081800 | 0.19920900  |
| H  | -2.60860300 | 3.85601800 | -0.81725000 |
| H  | -6.40081000 | 3.15318800 | 1.16469000  |
| H  | -4.64137600 | 4.74630800 | 0.36926500  |
| Cl | 0.31636800  | 3.07657800 | -0.94993100 |

|    |             |             |             |
|----|-------------|-------------|-------------|
| C  | 4.66553300  | -3.20419000 | 0.89576800  |
| H  | 3.30551100  | -4.77302000 | 0.20269000  |
| H  | 5.76688700  | -1.45419100 | 1.52590400  |
| H  | 5.42740900  | -3.90057900 | 1.26074300  |
| O  | 1.39719100  | -3.25434400 | -0.72338200 |
| C  | 1.84958800  | -0.33278400 | -2.66715100 |
| C  | 3.00600900  | 0.68771600  | -2.68030600 |
| H  | 3.30158200  | 0.87077700  | -3.73062200 |
| H  | 2.70687100  | 1.64826100  | -2.23015600 |
| H  | 3.89077900  | 0.30517600  | -2.14368800 |
| C  | 0.63423700  | 0.21973000  | -3.43755200 |
| H  | -0.22757200 | -0.47166400 | -3.40560700 |
| H  | 0.31474600  | 1.19353600  | -3.03131200 |
| H  | 0.91283100  | 0.35562200  | -4.49938100 |
| C  | 2.32312800  | -1.66038700 | -3.28695300 |
| H  | 2.66643900  | -1.45706300 | -4.31820900 |
| H  | 3.17158900  | -2.09689300 | -2.73411300 |
| H  | 1.52270300  | -2.41705500 | -3.34747000 |
| P  | 1.29409500  | -0.55256700 | -0.85554800 |
| C  | 4.22098000  | 0.55937400  | 0.77933900  |
| C  | 5.52746600  | 1.02762400  | 0.50490500  |
| C  | 3.27004000  | 1.47013500  | 1.27900900  |
| C  | 5.86899300  | 2.36616900  | 0.72574600  |
| H  | 6.26978100  | 0.33633800  | 0.09116700  |
| C  | 3.61405400  | 2.81033600  | 1.49881600  |
| H  | 2.24509200  | 1.13384400  | 1.48368400  |
| C  | 4.91260900  | 3.26195000  | 1.22917700  |
| H  | 6.88181900  | 2.71306000  | 0.49505300  |
| H  | 2.85116000  | 3.50387800  | 1.86451000  |
| H  | 5.17681400  | 4.31113600  | 1.39763900  |
| C  | -4.25929300 | 0.84882900  | -0.43985900 |
| C  | -3.35981400 | 1.71982800  | -1.09121500 |
| C  | -5.39713400 | 1.39803800  | 0.19013300  |
| C  | -3.58422900 | 3.10456500  | -1.09476500 |
| H  | -2.47978100 | 1.30828900  | -1.59791100 |
| C  | -5.61726000 | 2.78206600  | 0.19014400  |
| H  | -6.10342600 | 0.72981500  | 0.69550500  |
| C  | -4.71008600 | 3.63964600  | -0.45139500 |
| H  | -2.86939200 | 3.76119500  | -1.60160000 |
| H  | -6.49861300 | 3.19132000  | 0.69506100  |
| H  | -4.88242000 | 4.72090700  | -0.45297800 |
| Cl | 0.96266600  | 3.00250900  | -0.86028800 |

## Int 2

|                                              |                             |
|----------------------------------------------|-----------------------------|
| Zero-point correction=                       | 0.617007 (Hartree/Particle) |
| Thermal correction to Energy=                | 0.657648                    |
| Thermal correction to Enthalpy=              | 0.658592                    |
| Thermal correction to Gibbs Free Energy=     | 0.544629                    |
| Sum of electronic and zero-point Energies=   | -2713.583915                |
| Sum of electronic and thermal Energies=      | -2713.543275                |
| Sum of electronic and thermal Enthalpies=    | -2713.542330                |
| Sum of electronic and thermal Free Energies= | -2713.656293                |
| Electronic energy                            | -2714.82446122              |

|    |             |             |             |
|----|-------------|-------------|-------------|
| C  | -5.12002300 | -1.42597000 | -0.97175500 |
| C  | -4.06264400 | -0.62749400 | -0.48092100 |
| C  | -2.86389500 | -1.27230300 | -0.08384600 |
| C  | -2.75401200 | -2.67428500 | -0.23805700 |
| C  | -3.80140200 | -3.46070500 | -0.73583800 |
| C  | -4.99166300 | -2.81718200 | -1.09091600 |
| H  | -6.04027900 | -0.93199200 | -1.29786500 |
| H  | -3.66979200 | -4.54146300 | -0.83571600 |
| H  | -5.82534200 | -3.40604600 | -1.48693400 |
| O  | -1.58722100 | -3.28965300 | 0.15004100  |
| C  | -0.54606400 | -2.32218700 | 0.40745300  |
| P  | -1.34757600 | -0.65720200 | 0.78395600  |
| C  | -1.79740000 | -0.74115500 | 2.64425800  |
| C  | -2.73898600 | 0.43692000  | 2.96129000  |
| H  | -2.99717400 | 0.41513300  | 4.03635900  |
| H  | -3.67947700 | 0.38305400  | 2.38733900  |
| H  | -2.26578500 | 1.41134900  | 2.75412100  |
| C  | -2.48841700 | -2.06501800 | 3.01787100  |
| H  | -2.70722900 | -2.06112000 | 4.10199100  |
| H  | -1.85781100 | -2.94557700 | 2.80931600  |
| H  | -3.44471500 | -2.19424600 | 2.48408700  |
| C  | -0.47737800 | -0.58073500 | 3.42248300  |
| H  | 0.05107500  | 0.33949300  | 3.11906100  |
| H  | 0.20769100  | -1.43239800 | 3.26102500  |
| H  | -0.69217000 | -0.52890900 | 4.50619700  |
| Ir | -0.09758500 | 1.03901100  | 0.05968400  |
| H  | 0.02787400  | -2.68537000 | 1.27609600  |
| H  | -1.36651200 | 2.18700300  | 0.42948800  |
| H  | -0.83959500 | 2.14227400  | 1.17569100  |
| C  | 0.39609200  | -2.22056200 | -0.80333500 |
| H  | -0.17806800 | -2.38984300 | -1.72901300 |
| C  | 2.71266100  | -1.37670700 | -0.00012700 |
| C  | 2.53634100  | -2.77929100 | -0.11934000 |
| C  | 3.90670800  | -0.88155100 | 0.58952800  |
| C  | 3.49456800  | -3.70250400 | 0.31732700  |
| C  | 4.86363600  | -1.82492500 | 1.03336300  |

## OA TS

|                                              |                             |
|----------------------------------------------|-----------------------------|
| Zero-point correction=                       | 0.615090 (Hartree/Particle) |
| Thermal correction to Energy=                | 0.655634                    |
| Thermal correction to Enthalpy=              | 0.656578                    |
| Thermal correction to Gibbs Free Energy=     | 0.542554                    |
| Sum of electronic and zero-point Energies=   | -2713.585444                |
| Sum of electronic and thermal Energies=      | -2713.544900                |
| Sum of electronic and thermal Enthalpies=    | -2713.543956                |
| Sum of electronic and thermal Free Energies= | -2713.657981                |
| Electronic energy                            | -2714.82455219              |

|   |            |            |             |
|---|------------|------------|-------------|
| C | 5.10801600 | 1.47009000 | -0.98322700 |
| C | 4.06314000 | 0.65633300 | -0.49042500 |
| C | 2.85631700 | 1.28423100 | -0.08930100 |
| C | 2.72946000 | 2.68562700 | -0.23866500 |
| C | 3.76459200 | 3.48674500 | -0.73843100 |
| C | 4.96158100 | 2.85961100 | -1.09966100 |
| H | 6.03375300 | 0.98860700 | -1.31243600 |
| H | 3.61836400 | 4.56595200 | -0.83455000 |
| H | 5.78618500 | 3.45988500 | -1.49754000 |

|    |             |             |             |
|----|-------------|-------------|-------------|
| O  | 1.55807200  | 3.28714000  | 0.15762000  |
| C  | 0.52804500  | 2.30752300  | 0.41201400  |
| P  | 1.35061100  | 0.65017900  | 0.78422200  |
| C  | 1.80500300  | 0.73559500  | 2.64197900  |
| C  | 2.75585600  | -0.43700700 | 2.95239400  |
| H  | 3.01319500  | -0.41906400 | 4.02772700  |
| H  | 3.69609700  | -0.37116900 | 2.37929200  |
| H  | 2.29143300  | -1.41406600 | 2.73760900  |
| C  | 2.48845000  | 2.06366200  | 3.01510900  |
| H  | 2.71323500  | 2.05834100  | 4.09793500  |
| H  | 1.85037200  | 2.94024100  | 2.81243600  |
| H  | 3.44084800  | 2.20113900  | 2.47648300  |
| C  | 0.48923000  | 0.56618700  | 3.42579500  |
| H  | -0.03543100 | -0.35699900 | 3.12533500  |
| H  | -0.20142000 | 1.41420600  | 3.26883200  |
| H  | 0.71000800  | 0.51486100  | 4.50827400  |
| Ir | 0.11371400  | -1.06371500 | 0.07100600  |
| H  | -0.04866700 | 2.66137100  | 1.28277100  |
| H  | 1.37461300  | -2.13373200 | 0.36276000  |
| H  | 0.76077200  | -2.06220800 | 1.23649500  |
| C  | -0.41428700 | 2.20874300  | -0.80037300 |
| H  | 0.16218600  | 2.37559600  | -1.72515700 |
| C  | -2.73531300 | 1.38000800  | -0.00274900 |
| C  | -2.55089900 | 2.78202900  | -0.11810200 |
| C  | -3.92968800 | 0.88716600  | 0.58738100  |
| C  | -3.50517500 | 3.70767600  | 0.32196000  |
| C  | -4.88241700 | 1.83326600  | 1.03399400  |
| C  | -4.67800800 | 3.21203200  | 0.89946800  |
| H  | -3.31222700 | 4.77786100  | 0.21111300  |
| H  | -5.78689300 | 1.46535600  | 1.52640400  |
| H  | -5.43656600 | 3.91071100  | 1.26694400  |
| O  | -1.40869600 | 3.25046300  | -0.72033200 |
| C  | -1.86994700 | 0.33032600  | -2.66978200 |
| C  | -3.00475400 | -0.71423500 | -2.68189100 |
| H  | -3.29477200 | -0.90784600 | -3.73187200 |
| H  | -2.68572700 | -1.66669400 | -2.22722800 |
| H  | -3.89822600 | -0.34891900 | -2.14768100 |
| C  | -0.64116200 | -0.20165900 | -3.43384100 |
| H  | 0.20486800  | 0.50929800  | -3.40816300 |
| H  | -0.29989200 | -1.16551000 | -3.02036600 |
| H  | -0.91457700 | -0.35379500 | -4.49472800 |
| C  | -2.36452500 | 1.64914000  | -3.28994600 |
| H  | -2.70106900 | 1.44308800  | -4.32292700 |
| H  | -3.22184400 | 2.06930500  | -2.73793700 |
| H  | -1.57691500 | 2.41966700  | -3.34465800 |
| P  | -1.32385000 | 0.54933600  | -0.85729300 |
| C  | -4.24502300 | -0.55386100 | 0.77269800  |
| C  | -5.55252400 | -1.02046200 | 0.50045000  |
| C  | -3.29198300 | -1.46779000 | 1.26296900  |
| C  | -5.89265100 | -2.36062600 | 0.71372600  |
| H  | -6.29659400 | -0.32668500 | 0.09414800  |
| C  | -3.63424000 | -2.80975400 | 1.47430500  |
| H  | -2.26747900 | -1.13297800 | 1.47104100  |
| C  | -4.93380400 | -3.25972800 | 1.20643900  |
| H  | -6.90638200 | -2.70621700 | 0.48509900  |
| H  | -2.86929800 | -3.50512100 | 1.83191300  |
| H  | -5.19690600 | -4.31020100 | 1.36833400  |
| C  | 4.28434100  | -0.81657700 | -0.45031000 |
| C  | 3.40088600  | -1.70261500 | -1.10255800 |
| C  | 5.43158400  | -1.34587000 | 0.17981100  |
| C  | 3.64936000  | -3.08303700 | -1.10669000 |
| H  | 2.51490900  | -1.30607700 | -1.60987000 |
| C  | 5.67602000  | -2.72573700 | 0.17897700  |
| H  | 6.12569300  | -0.66557900 | 0.68595400  |
| C  | 4.78415400  | -3.59853300 | -0.46340300 |
| H  | 2.94584400  | -3.75204600 | -1.61290100 |

|    |             |             |             |
|----|-------------|-------------|-------------|
| H  | 6.56422000  | -3.11979800 | 0.68398500  |
| H  | 4.97507700  | -4.67666500 | -0.46506600 |
| Cl | -0.94594000 | -3.03015200 | -0.83754200 |

### Int 3

|                                              |                             |
|----------------------------------------------|-----------------------------|
| Zero-point correction=                       | 0.618839 (Hartree/Particle) |
| Thermal correction to Energy=                | 0.659417                    |
| Thermal correction to Enthalpy=              | 0.660361                    |
| Thermal correction to Gibbs Free Energy=     | 0.545736                    |
| Sum of electronic and zero-point Energies=   | -2713.601388                |
| Sum of electronic and thermal Energies=      | -2713.560810                |
| Sum of electronic and thermal Enthalpies=    | -2713.559866                |
| Sum of electronic and thermal Free Energies= | -2713.674491                |
| Electronic energy                            | -2714.83716257              |

|    |             |             |             |
|----|-------------|-------------|-------------|
| C  | -4.87309700 | -0.60105800 | -1.97379400 |
| C  | -4.00855500 | -0.21231200 | -0.92935700 |
| C  | -2.82149600 | -0.96584400 | -0.72330700 |
| C  | -2.53335100 | -2.03725500 | -1.60080500 |
| C  | -3.38366400 | -2.40052900 | -2.65371600 |
| C  | -4.56259300 | -1.67178000 | -2.82548000 |
| H  | -5.79005700 | -0.02515500 | -2.12939700 |
| H  | -3.11448400 | -3.23843100 | -3.30214000 |
| H  | -5.24778000 | -1.93547600 | -3.63750100 |
| O  | -1.37917500 | -2.75366200 | -1.42301400 |
| C  | -0.71447300 | -2.46130400 | -0.17826500 |
| P  | -1.46517100 | -0.84018600 | 0.51364500  |
| C  | -2.11126200 | -1.31502300 | 2.24075800  |
| C  | -2.68119900 | -0.05937300 | 2.92896200  |
| H  | -2.97787300 | -0.32546100 | 3.96062300  |
| H  | -3.56957900 | 0.33322100  | 2.40934100  |
| H  | -1.92965200 | 0.74515900  | 2.97975800  |
| C  | -3.20041200 | -2.39858600 | 2.12610300  |
| H  | -3.55314400 | -2.66018100 | 3.14053100  |
| H  | -2.83217600 | -3.32873400 | 1.65840000  |
| H  | -4.06801200 | -2.04406400 | 1.54537500  |
| C  | -0.90903900 | -1.83603000 | 3.05538000  |
| H  | -0.12635600 | -1.06530200 | 3.15883700  |
| H  | -0.44300100 | -2.73552300 | 2.61753800  |
| H  | -1.25702600 | -2.09967200 | 4.07091800  |
| Ir | -0.09768800 | 0.86425100  | 0.18684200  |
| H  | -0.91968800 | -3.29670100 | 0.51696900  |
| H  | -1.13800000 | 1.84713100  | 0.95664800  |
| C  | 0.79048000  | -2.41888200 | -0.44410300 |
| H  | 0.97749400  | -3.00612600 | -1.36181700 |
| C  | 2.87535900  | -1.15152400 | 0.53988500  |
| C  | 2.59826900  | -2.43639400 | 1.05719400  |
| C  | 4.02227300  | -0.45793100 | 1.00714800  |
| C  | 3.43522900  | -3.07668300 | 1.98023500  |
| C  | 4.87030300  | -1.11311100 | 1.92852200  |
| C  | 4.58207000  | -2.39849000 | 2.40527400  |
| H  | 3.18207700  | -4.07739700 | 2.34028200  |
| H  | 5.75104700  | -0.57911600 | 2.29714300  |
| H  | 5.25391500  | -2.87357500 | 3.12738800  |
| O  | 1.45831900  | -3.08198400 | 0.64925400  |
| C  | 2.24467800  | -0.70114600 | -2.41446100 |
| C  | 2.99085200  | 0.62545100  | -2.66378300 |
| H  | 3.28393400  | 0.67041800  | -3.72994900 |
| H  | 2.35141400  | 1.49606400  | -2.44343500 |
| H  | 3.90786200  | 0.70207300  | -2.05803300 |
| C  | 1.00793000  | -0.76890500 | -3.33547600 |
| H  | 0.43153000  | -1.70262900 | -3.20908100 |

|    |             |             |             |
|----|-------------|-------------|-------------|
| H  | 0.33097900  | 0.08384700  | -3.15136800 |
| H  | 1.33938900  | -0.72070400 | -4.38932000 |
| C  | 3.19113900  | -1.88816800 | -2.65601800 |
| H  | 3.58665100  | -1.82992900 | -3.68745100 |
| H  | 4.04993500  | -1.86954900 | -1.96364000 |
| H  | 2.69106100  | -2.86781900 | -2.55621300 |
| P  | 1.54254500  | -0.66503500 | -0.63876600 |
| C  | 4.37512000  | 0.92623400  | 0.58983800  |
| C  | 5.69619300  | 1.23046600  | 0.19102400  |
| C  | 3.42369500  | 1.96599200  | 0.61907400  |
| C  | 6.04614100  | 2.53327000  | -0.18582900 |
| H  | 6.44231600  | 0.42917600  | 0.15287800  |
| C  | 3.77321400  | 3.26769500  | 0.23903600  |
| H  | 2.39800800  | 1.75610300  | 0.94505900  |
| C  | 5.08460000  | 3.55564400  | -0.16550300 |
| H  | 7.07156300  | 2.74849000  | -0.50470100 |
| H  | 3.00894100  | 4.05085500  | 0.25316900  |
| H  | 5.35725900  | 4.57259400  | -0.46613800 |
| C  | -4.40785200 | 0.96790700  | -0.10962200 |
| C  | -3.63471800 | 2.14663800  | -0.10426300 |
| C  | -5.62147400 | 0.94176200  | 0.61174900  |
| C  | -4.05522500 | 3.26325500  | 0.63195600  |
| H  | -2.70584300 | 2.19178200  | -0.68004100 |
| C  | -6.03506800 | 2.05797600  | 1.35146000  |
| H  | -6.23250800 | 0.03218500  | 0.59888100  |
| C  | -5.24956900 | 3.22115700  | 1.36550900  |
| H  | -3.44058800 | 4.16913600  | 0.62580900  |
| H  | -6.97220100 | 2.01862900  | 1.91677900  |
| H  | -5.57249000 | 4.09431800  | 1.94209700  |
| Cl | 0.27142900  | 2.73980200  | -1.25589500 |
| H  | 0.36201800  | 0.48121100  | 1.65411700  |

R=Me

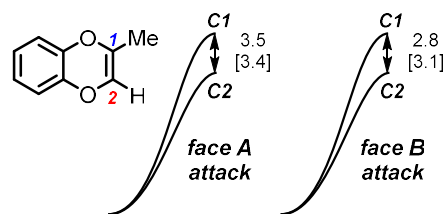

R=Me, face A, C1 TS

|                                              |                             |
|----------------------------------------------|-----------------------------|
| Zero-point correction=                       | 0.779446 (Hartree/Particle) |
| Thermal correction to Energy=                | 0.830617                    |
| Thermal correction to Enthalpy=              | 0.831561                    |
| Thermal correction to Gibbs Free Energy=     | 0.694714                    |
| Sum of electronic and zero-point Energies=   | -3212.173961                |
| Sum of electronic and thermal Energies=      | -3212.122790                |
| Sum of electronic and thermal Enthalpies=    | -3212.121846                |
| Sum of electronic and thermal Free Energies= | -3212.258693                |
| Electronic energy                            | -3213.73835870              |

|    |             |             |             |
|----|-------------|-------------|-------------|
| C  | 0.82429000  | 3.23686400  | -1.64745100 |
| C  | -0.54253900 | 3.47008200  | -1.92627600 |
| C  | 0.60353300  | 4.62722000  | 0.25966500  |
| C  | -0.79321800 | 4.57845400  | 0.11543600  |
| H  | 0.72892800  | 2.12032400  | -1.00523500 |
| C  | -4.97408200 | -2.19040800 | -1.68562800 |
| C  | -4.14331600 | -1.45965500 | -0.80817300 |
| C  | -2.89470900 | -2.01887900 | -0.43725800 |
| C  | -2.52120100 | -3.26504300 | -0.98977000 |
| C  | -3.33516200 | -3.97378700 | -1.88228400 |
| C  | -4.57231200 | -3.42083200 | -2.22295900 |
| H  | -5.93871700 | -1.75822300 | -1.96812900 |
| H  | -2.99604500 | -4.93532500 | -2.27680000 |
| H  | -5.23214000 | -3.95374100 | -2.91523600 |
| O  | -1.31298300 | -3.80849900 | -0.63683700 |
| C  | -0.73647000 | -3.16535300 | 0.51613300  |
| P  | -1.52798300 | -1.42578500 | 0.65468200  |
| C  | -2.16456600 | -1.35462100 | 2.45609800  |
| C  | -2.72628800 | 0.05298000  | 2.73783200  |
| H  | -3.00349700 | 0.11459900  | 3.80715300  |
| H  | -3.62492300 | 0.27203800  | 2.14052000  |
| H  | -1.97290200 | 0.82886900  | 2.52548000  |
| C  | -3.25388700 | -2.41599700 | 2.69475500  |
| H  | -3.56640700 | -2.37727000 | 3.75483700  |
| H  | -2.90029700 | -3.44281200 | 2.49369200  |
| H  | -4.14452900 | -2.23432000 | 2.07094700  |
| C  | -0.95989300 | -1.60105800 | 3.38840100  |
| H  | -0.16122400 | -0.85998800 | 3.21649400  |
| H  | -0.52165300 | -2.60653500 | 3.27352100  |
| H  | -1.29905300 | -1.50120200 | 4.43630700  |
| Ir | -0.01824500 | 0.15085100  | -0.04247800 |
| H  | 1.16619900  | 1.34484300  | -0.20163000 |
| H  | 0.46529900  | 0.31388600  | 1.47602400  |
| H  | -1.08591600 | 1.32075800  | 0.36351200  |
| H  | -0.99776300 | -3.76953200 | 1.40708600  |
| C  | -4.65307800 | -0.14595800 | -0.32139300 |
| C  | -5.89798200 | -0.08253600 | 0.34266000  |
| C  | -3.95343200 | 1.05099800  | -0.57780700 |
| C  | -6.42390600 | 1.14721700  | 0.76108700  |
| H  | -6.44727800 | -1.01013300 | 0.53945500  |

### Regioselectivity of the protonation

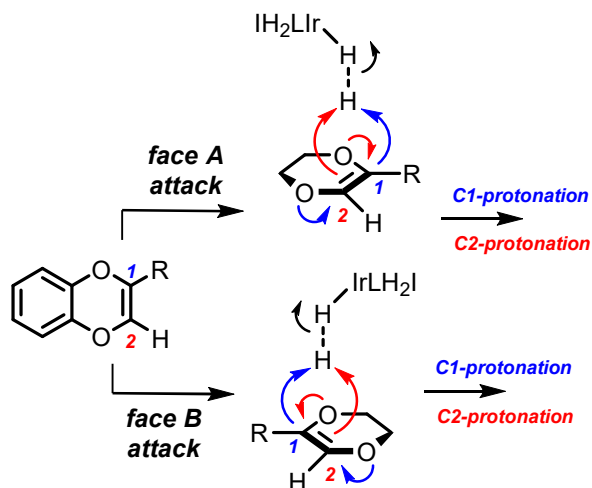



|    |             |             |             |
|----|-------------|-------------|-------------|
| C  | -4.49215400 | 2.27964600  | -0.17043500 |
| H  | -3.00071400 | 1.00928700  | -1.11680500 |
| C  | -5.72136400 | 2.33412700  | 0.50326100  |
| H  | -7.38489100 | 1.17799800  | 1.28569000  |
| H  | -3.94441100 | 3.20051500  | -0.39672400 |
| H  | -6.13574800 | 3.29710300  | 0.82106400  |
| Cl | -0.86102900 | 0.38869200  | -2.41430800 |
| O  | -1.37509500 | 4.02286300  | -1.04494500 |
| O  | 1.45213400  | 4.11271200  | -0.69182800 |
| C  | 1.14204300  | 5.24117200  | 1.39542400  |
| H  | 2.22993200  | 5.27556900  | 1.50343500  |
| C  | -1.64983500 | 5.11131900  | 1.07453400  |
| H  | -2.73021600 | 5.04237100  | 0.92021700  |
| C  | -1.10283500 | 5.71901800  | 2.21632000  |
| H  | -1.76642200 | 6.13542500  | 2.97893000  |
| C  | 0.28872500  | 5.78743900  | 2.36754500  |
| H  | 0.72230300  | 6.25999400  | 3.25392600  |
| C  | 0.78080300  | -3.18873400 | 0.35817600  |
| H  | 1.03692400  | -4.02915800 | -0.31439600 |
| P  | 1.57448800  | -1.56991700 | -0.30526700 |
| C  | 2.30909500  | -2.13123000 | -1.98529300 |
| C  | 1.13848200  | -2.68276200 | -2.82734200 |
| H  | 0.71031200  | -3.61134200 | -2.41295200 |
| H  | 0.32886500  | -1.93974300 | -2.92558500 |
| H  | 1.51453300  | -2.91711700 | -3.84131000 |
| C  | 2.87173600  | -0.87888100 | -2.68646100 |
| H  | 3.22802700  | -1.16122100 | -3.69544500 |
| H  | 2.08602500  | -0.11451400 | -2.80202200 |
| H  | 3.72118000  | -0.43831700 | -2.13954500 |
| C  | 3.40755600  | -3.19338200 | -1.81955600 |
| H  | 3.76847900  | -3.50085100 | -2.81922000 |
| H  | 4.27006900  | -2.80867500 | -1.25008800 |
| H  | 3.04319600  | -4.10323900 | -1.30943500 |
| C  | 2.90714000  | -1.78197200 | 0.97170700  |
| C  | 4.13733600  | -1.11528400 | 1.20297100  |
| C  | 2.53834900  | -2.82035700 | 1.85735200  |
| C  | 4.94753700  | -1.53339300 | 2.28300300  |
| C  | 3.33013400  | -3.21756100 | 2.94299000  |
| C  | 4.54709300  | -2.56191600 | 3.14551700  |
| H  | 5.89701500  | -1.01604300 | 2.45091300  |
| H  | 2.99029500  | -4.03115400 | 3.58954800  |
| H  | 5.19043400  | -2.85515800 | 3.98139700  |
| O  | 1.35113700  | -3.47162900 | 1.65255300  |
| C  | 4.66044200  | 0.01368400  | 0.37889500  |
| C  | 5.90112600  | -0.11740400 | -0.28239600 |
| C  | 3.99294000  | 1.25327300  | 0.32664100  |
| C  | 6.44935600  | 0.95628800  | -0.99720700 |
| H  | 6.43004100  | -1.07585000 | -0.23807400 |
| C  | 4.54949300  | 2.33166900  | -0.37674300 |
| H  | 3.03986600  | 1.36915400  | 0.85048800  |
| C  | 5.77481400  | 2.18543400  | -1.04513400 |
| H  | 7.40703500  | 0.83296900  | -1.51402300 |
| H  | 4.01677700  | 3.28799900  | -0.39864900 |
| H  | 6.20590300  | 3.02807500  | -1.59606700 |
| H  | -1.05324200 | 3.01906800  | -2.77811500 |
| C  | 1.76593100  | 2.95007700  | -2.79773500 |
| H  | 2.67684400  | 2.46125900  | -2.41933400 |
| H  | 1.27335900  | 2.26537800  | -3.50546800 |
| H  | 2.04905200  | 3.88291500  | -3.31366100 |

|                                              |                |
|----------------------------------------------|----------------|
| Thermal correction to Gibbs Free Energy=     | 0.694059       |
| Sum of electronic and zero-point Energies=   | -3212.177535   |
| Sum of electronic and thermal Energies=      | -3212.126327   |
| Sum of electronic and thermal Enthalpies=    | -3212.125382   |
| Sum of electronic and thermal Free Energies= | -3212.262419   |
| Electronic energy                            | -3213.74334272 |

|    |             |             |             |
|----|-------------|-------------|-------------|
| C  | -1.56680900 | 3.02982000  | -1.53027600 |
| C  | -0.82472100 | 3.95559100  | -0.79162800 |
| C  | -3.42751900 | 3.41362000  | -0.14330100 |
| C  | -2.62889600 | 4.23233000  | 0.67360300  |
| H  | -1.06249000 | 1.75436900  | -1.16101400 |
| C  | 5.22437900  | 1.04063200  | 2.04635600  |
| C  | 4.42506000  | 0.68554500  | 0.93830000  |
| C  | 3.41175800  | -0.28889500 | 1.11813200  |
| C  | 3.22230700  | -0.83593700 | 2.40667000  |
| C  | 3.99731300  | -0.46030800 | 3.51120300  |
| C  | 5.00641300  | 0.48594400  | 3.31475000  |
| H  | 6.00844400  | 1.79038000  | 1.90348900  |
| H  | 3.80736800  | -0.91857800 | 4.48536300  |
| H  | 5.63169400  | 0.79475500  | 4.15870500  |
| O  | 2.24304900  | -1.77821500 | 2.58429500  |
| C  | 1.79410500  | -2.33652900 | 1.33457600  |
| P  | 2.17389000  | -1.04446800 | -0.02848300 |
| C  | 3.09641400  | -2.04893600 | -1.36505600 |
| C  | 3.34239600  | -1.14545300 | -2.58937600 |
| H  | 3.77259400  | -1.75940700 | -3.40296900 |
| H  | 4.04773400  | -0.32896500 | -2.37090000 |
| H  | 2.39913200  | -0.70053200 | -2.94659300 |
| C  | 4.43168600  | -2.59103900 | -0.82404000 |
| H  | 4.91793600  | -3.19771100 | -1.61042600 |
| H  | 4.29933100  | -3.24110100 | 0.05912300  |
| H  | 5.12111000  | -1.77701100 | -0.54628300 |
| C  | 2.17530400  | -3.21329200 | -1.78725100 |
| H  | 1.20375100  | -2.84311000 | -2.15539500 |
| H  | 1.98304600  | -3.92941900 | -0.97031900 |
| H  | 2.66229700  | -3.76802000 | -2.61053500 |
| Ir | 0.25346200  | 0.06204300  | -0.57701400 |
| H  | -1.25251000 | 0.72056100  | -1.06519900 |
| H  | 0.04257800  | -0.88259700 | -1.85755700 |
| H  | 1.09208300  | 0.98260300  | -1.64111000 |
| H  | 2.37674100  | -3.25934300 | 1.14486100  |
| H  | -1.31366300 | 2.92125200  | -2.59139700 |
| C  | 0.55792800  | 4.35994400  | -1.16123300 |
| H  | 1.02758400  | 3.56511200  | -1.76177300 |
| H  | 1.16201500  | 4.52606500  | -0.25756900 |
| H  | 0.53529300  | 5.29239700  | -1.75845600 |
| C  | 4.71050000  | 1.35734100  | -0.36015000 |
| C  | 6.00543300  | 1.29116400  | -0.91858700 |
| C  | 3.71901900  | 2.11384400  | -1.01707500 |
| C  | 6.29769300  | 1.94410100  | -2.12373100 |
| H  | 6.77942600  | 0.70867100  | -0.40641100 |
| C  | 4.01934600  | 2.77096000  | -2.21856500 |
| H  | 2.72309900  | 2.18166200  | -0.56600800 |
| C  | 5.30268000  | 2.68507800  | -2.77891900 |
| H  | 7.30322800  | 1.87270700  | -2.55187800 |
| H  | 3.24469400  | 3.35852500  | -2.72358400 |
| H  | 5.52866000  | 3.19679400  | -3.72041900 |
| Cl | 0.55232700  | 1.90978800  | 1.10821900  |
| O  | -1.32261400 | 4.57931000  | 0.29300800  |
| O  | -2.96851900 | 2.91955500  | -1.34515700 |
| C  | -4.73079900 | 3.10977500  | 0.26289200  |
| H  | -5.33452700 | 2.45510700  | -0.37183800 |
| C  | -3.10406300 | 4.73872200  | 1.88034000  |
| H  | -2.44120200 | 5.36263800  | 2.48631900  |
| C  | -4.41470500 | 4.43432000  | 2.28427500  |

### R=Me, face A, C2 TS

|                                 |                             |
|---------------------------------|-----------------------------|
| Zero-point correction=          | 0.778944 (Hartree/Particle) |
| Thermal correction to Energy=   | 0.830152                    |
| Thermal correction to Enthalpy= | 0.831096                    |

|   |             |             |             |    |             |             |             |
|---|-------------|-------------|-------------|----|-------------|-------------|-------------|
| H | -4.79466600 | 4.82895800  | 3.23074800  | C  | -5.25703500 | -0.53685300 | 3.16961600  |
| C | -5.22162700 | 3.62462500  | 1.47426600  | H  | -6.12034500 | -1.94806200 | 1.76867900  |
| H | -6.24150400 | 3.37865900  | 1.78513500  | H  | -4.17750800 | 0.95866400  | 4.34379600  |
| C | 0.32706600  | -2.72678800 | 1.49893100  | H  | -5.93050200 | -0.82028000 | 3.98491000  |
| H | 0.12933200  | -2.83089300 | 2.58130700  | O  | -2.50235800 | 1.76105800  | 2.50983200  |
| P | -0.93507000 | -1.49921500 | 0.73992100  | C  | -1.96760800 | 2.26163300  | 1.26877000  |
| C | -2.02700800 | -1.01534700 | 2.24057000  | P  | -2.25517300 | 0.90604000  | -0.05419500 |
| C | -1.09592100 | -0.43851500 | 3.32829800  | C  | -3.11495800 | 1.83107900  | -1.48514200 |
| H | -0.41867500 | -1.19484200 | 3.76205400  | C  | -3.27194500 | 0.86827900  | -2.67839100 |
| H | -0.48741200 | 0.39471500  | 2.93761500  | H  | -3.68613600 | 1.43102200  | -3.53610300 |
| H | -1.72230200 | -0.05099200 | 4.15402100  | H  | -3.95619000 | 0.03478700  | -2.45581000 |
| C | -2.98038400 | 0.09934000  | 1.76684800  | H  | -2.29812900 | 0.44520700  | -2.97417000 |
| H | -3.59851200 | 0.43492800  | 2.62085900  | C  | -4.48967600 | 2.36811700  | -1.04793500 |
| H | -2.40966900 | 0.96819200  | 1.39962500  | H  | -4.93669600 | 2.93641700  | -1.88462800 |
| H | -3.66244400 | -0.23838000 | 0.96901000  | H  | -4.42187000 | 3.05286800  | -0.18415200 |
| C | -2.81886300 | -2.21551400 | 2.78341400  | H  | -5.18140900 | 1.55222700  | -0.78168200 |
| H | -3.39112100 | -1.89863700 | 3.67572900  | C  | -2.19179900 | 2.99485200  | -1.90441200 |
| H | -3.53410800 | -2.60690200 | 2.04110600  | H  | -1.19095700 | 2.63108800  | -2.19230400 |
| H | -2.16154300 | -3.04867400 | 3.09163800  | H  | -2.06850000 | 3.75346100  | -1.11260100 |
| C | -1.77170800 | -2.94650300 | -0.07050400 | H  | -2.63575900 | 3.50019300  | -2.78190800 |
| C | -2.96777500 | -3.06944700 | -0.82487600 | Ir | -0.28964400 | -0.17845300 | -0.46698000 |
| C | -1.01816600 | -4.11768000 | 0.17232000  | C  | 1.22788600  | -0.81665400 | -0.93049800 |
| C | -3.36221600 | -4.35121300 | -1.27170100 | H  | -0.09010400 | 0.69415100  | -1.79617900 |
| C | -1.39875700 | -5.38451600 | -0.29177000 | H  | -1.06955100 | -1.17904900 | -1.49513800 |
| C | -2.58789100 | -5.49003300 | -1.01617100 | H  | -2.53576200 | 3.17303000  | 0.99774300  |
| H | -4.28437600 | -4.43623900 | -1.85432200 | C  | -4.66904600 | -1.60315700 | -0.41956700 |
| H | -0.77201600 | -6.25171100 | -0.06701100 | C  | -5.91120000 | -1.60440600 | -1.09010700 |
| H | -2.91429800 | -6.46680000 | -1.38757000 | C  | -3.61168800 | -2.38018200 | -0.93545200 |
| O | 0.13908800  | -4.02357800 | 0.89634600  | C  | -6.08603000 | -2.34390600 | -2.26791700 |
| C | -3.86565100 | -1.93906700 | -1.20186800 | H  | -6.73705500 | -1.00721700 | -0.68747800 |
| C | -5.23084900 | -1.98149800 | -0.84175700 | C  | -3.79433900 | -3.12323900 | -2.10997300 |
| C | -3.41169200 | -0.88097600 | -2.01448900 | H  | -2.65767900 | -2.39846600 | -0.39828300 |
| C | -6.11809200 | -0.98760300 | -1.27573400 | C  | -5.02522100 | -3.10443600 | -2.78294600 |
| H | -5.59092900 | -2.80306500 | -0.21276700 | H  | -7.05174200 | -2.32490100 | -2.78417700 |
| C | -4.30348800 | 0.10524300  | -2.45843100 | H  | -2.96723900 | -3.72613000 | -2.50168600 |
| H | -2.35783000 | -0.84565100 | -2.30585700 | H  | -5.16006700 | -3.68371900 | -3.70250600 |
| C | -5.65691900 | 0.05659200  | -2.09177700 | Cl | -0.63992900 | -1.90457800 | 1.32530900  |
| H | -7.17231000 | -1.03407600 | -0.98227300 | O  | 1.70102400  | -4.27502800 | 1.05597600  |
| H | -3.93908700 | 0.91772100  | -3.09386000 | O  | 2.92130400  | -3.00809800 | -1.19664300 |
| H | -6.35211300 | 0.82418100  | -2.44940600 | C  | 4.98385800  | -2.90661700 | 0.00965700  |

### R=Me, face B, C1 TS

Zero-point correction= 0.778569 (Hartree/Particle)  
Thermal correction to Energy= 0.829915  
Thermal correction to Enthalpy= 0.830859  
Thermal correction to Gibbs Free Energy= 0.693106  
Sum of electronic and zero-point Energies= -3212.174337  
Sum of electronic and thermal Energies= -3212.122991  
Sum of electronic and thermal Enthalpies= -3212.122047  
Sum of electronic and thermal Free Energies= -3212.259800  
Electronic energy -3213.73832121

|   |             |             |             |
|---|-------------|-------------|-------------|
| C | 1.50287200  | -3.17592700 | -1.10147900 |
| C | 0.99222300  | -3.90653700 | -0.02106000 |
| C | 3.63184800  | -3.26260500 | -0.04458700 |
| C | 3.04923300  | -3.88797600 | 1.07157700  |
| H | 1.05504100  | -1.89241900 | -0.82362800 |
| C | -5.37097300 | -1.16561700 | 1.92195400  |
| C | -4.50684100 | -0.84469800 | 0.85309900  |
| C | -3.53975100 | 0.17266300  | 1.04824400  |
| C | -3.44956200 | 0.78982500  | 2.31572300  |
| C | -4.28885400 | 0.44788500  | 3.38370800  |

|    |             |             |             |
|----|-------------|-------------|-------------|
| C  | -5.25703500 | -0.53685300 | 3.16961600  |
| H  | -6.12034500 | -1.94806200 | 1.76867900  |
| H  | -4.17750800 | 0.95866400  | 4.34379600  |
| H  | -5.93050200 | -0.82028000 | 3.98491000  |
| O  | -2.50235800 | 1.76105800  | 2.50983200  |
| C  | -1.96760800 | 2.26163300  | 1.26877000  |
| P  | -2.25517300 | 0.90604000  | -0.05419500 |
| C  | -3.11495800 | 1.83107900  | -1.48514200 |
| C  | -3.27194500 | 0.86827900  | -2.67839100 |
| H  | -3.68613600 | 1.43102200  | -3.53610300 |
| H  | -3.95619000 | 0.03478700  | -2.45581000 |
| H  | -2.29812900 | 0.44520700  | -2.97417000 |
| C  | -4.48967600 | 2.36811700  | -1.04793500 |
| H  | -4.93669600 | 2.93641700  | -1.88462800 |
| H  | -4.42187000 | 3.05286800  | -0.18415200 |
| H  | -5.18140900 | 1.55222700  | -0.78168200 |
| C  | -2.19179900 | 2.99485200  | -1.90441200 |
| H  | -1.19095700 | 2.63108800  | -2.19230400 |
| H  | -2.06850000 | 3.75346100  | -1.11260100 |
| H  | -2.63575900 | 3.50019300  | -2.78190800 |
| Ir | -0.28964400 | -0.17845300 | -0.46698000 |
| C  | 1.22788600  | -0.81665400 | -0.93049800 |
| H  | -0.09010400 | 0.69415100  | -1.79617900 |
| H  | -1.06955100 | -1.17904900 | -1.49513800 |
| H  | -2.53576200 | 3.17303000  | 0.99774300  |
| C  | -4.66904600 | -1.60315700 | -0.41956700 |
| C  | -5.91120000 | -1.60440600 | -1.09010700 |
| C  | -3.61168800 | -2.38018200 | -0.93545200 |
| C  | -6.08603000 | -2.34390600 | -2.26791700 |
| H  | -6.73705500 | -1.00721700 | -0.68747800 |
| C  | -3.79433900 | -3.12323900 | -2.10997300 |
| H  | -2.65767900 | -2.39846600 | -0.39828300 |
| C  | -5.02522100 | -3.10443600 | -2.78294600 |
| H  | -7.05174200 | -2.32490100 | -2.78417700 |
| H  | -2.96723900 | -3.72613000 | -2.50168600 |
| H  | -5.16006700 | -3.68371900 | -3.70250600 |
| Cl | -0.63992900 | -1.90457800 | 1.32530900  |
| O  | 1.70102400  | -4.27502800 | 1.05597600  |
| O  | 2.92130400  | -3.00809800 | -1.19664300 |
| C  | 4.98385800  | -2.90661700 | 0.00965700  |
| H  | 5.42319700  | -2.40069000 | -0.85392700 |
| C  | 3.78302300  | -4.15473500 | 2.22491600  |
| H  | 3.28035700  | -4.63800600 | 3.06743200  |
| C  | 5.14058800  | -3.79768400 | 2.27278200  |
| H  | 5.72392400  | -4.00414400 | 3.17443500  |
| C  | 5.73413100  | -3.17715200 | 1.16555100  |
| H  | 6.78934200  | -2.88933700 | 1.19642500  |
| C  | -0.51262500 | 2.67403800  | 1.51057000  |
| H  | -0.37221500 | 2.74403700  | 2.60398800  |
| P  | 0.81892000  | 1.50107600  | 0.77524500  |
| C  | 1.96936500  | 1.16509500  | 2.27371700  |
| C  | 1.12030000  | 0.50069100  | 3.37712900  |
| H  | 0.34093700  | 1.17037700  | 3.78108700  |
| H  | 0.62995700  | -0.41837900 | 3.01521700  |
| H  | 1.78589400  | 0.23246200  | 4.21953400  |
| C  | 3.04564600  | 0.16639500  | 1.80461800  |
| H  | 3.68774400  | -0.10719800 | 2.66305300  |
| H  | 2.58530100  | -0.75834500 | 1.41934800  |
| H  | 3.69470700  | 0.58573500  | 1.01836700  |
| C  | 2.62165000  | 2.45501600  | 2.79882000  |
| H  | 3.23658800  | 2.21411900  | 3.68638500  |
| H  | 3.27825700  | 2.92423300  | 2.04748400  |
| H  | 1.87389000  | 3.20588200  | 3.11181500  |
| C  | 1.56407300  | 2.96336500  | -0.09363300 |
| C  | 2.72079000  | 3.11827300  | -0.90485400 |
| C  | 0.79412000  | 4.11548900  | 0.18821600  |

|   |             |             |             |    |             |             |             |
|---|-------------|-------------|-------------|----|-------------|-------------|-------------|
| C | 3.05653700  | 4.41157600  | -1.36782700 | H  | -0.36091600 | -3.40587600 | -2.66260500 |
| C | 1.12070700  | 5.39347000  | -0.28745400 | H  | 0.50842800  | -2.82374300 | -4.10697400 |
| C | 2.26868700  | 5.53048200  | -1.06928900 | Ir | -0.02489900 | 0.10971300  | -0.15939900 |
| H | 3.94369000  | 4.52168100  | -1.99844000 | H  | -0.87785000 | 1.58850800  | -0.27434800 |
| H | 0.48312400  | 6.24331300  | -0.02939600 | H  | -0.52423900 | 0.05904300  | -1.68409100 |
| H | 2.55134100  | 6.51560500  | -1.45423100 | H  | 1.23589400  | 0.93180000  | -0.78770000 |
| O | -0.32428500 | 3.99732300  | 0.96633900  | H  | 0.05644500  | -4.15820200 | -0.59745600 |
| C | 3.63802500  | 2.01933600  | -1.32775600 | H  | -1.74413500 | 3.61423400  | 1.16846100  |
| C | 5.02483500  | 2.13957900  | -1.08336400 | C  | -0.05087700 | 3.51865800  | 3.37602000  |
| C | 3.17847200  | 0.91722800  | -2.07634700 | H  | -0.98916800 | 2.96096600  | 3.50701800  |
| C | 5.92614800  | 1.18507900  | -1.57230100 | H  | -0.15587200 | 4.51062800  | 3.85897300  |
| H | 5.39140500  | 2.99213400  | -0.50117900 | H  | 0.76084500  | 2.96796700  | 3.87272700  |
| C | 4.08213200  | -0.03354300 | -2.57075600 | C  | 4.42672800  | -1.02563600 | 0.02141400  |
| H | 2.10919100  | 0.81540000  | -2.27993800 | C  | 5.59865300  | -1.38693800 | -0.67874200 |
| C | 5.45700400  | 0.09787800  | -2.32514500 | C  | 3.96663400  | 0.30509800  | -0.05271200 |
| H | 6.99691700  | 1.29535800  | -1.37015100 | C  | 6.28068700  | -0.44624500 | -1.46221900 |
| H | 3.70782400  | -0.88121300 | -3.15314600 | H  | 5.96183800  | -2.41911400 | -0.61741400 |
| H | 6.16206700  | -0.63843100 | -2.72689200 | C  | 4.65476300  | 1.24340400  | -0.83529700 |
| C | 0.89834100  | -3.33762900 | -2.48005200 | H  | 3.07538600  | 0.59621500  | 0.51337000  |
| H | 1.30868200  | -4.22747100 | -2.98787800 | C  | 5.80640000  | 0.87191400  | -1.54525400 |
| H | -0.19605600 | -3.42947000 | -2.39782700 | H  | 7.18055100  | -0.74487400 | -2.01075900 |
| H | 1.10940500  | -2.44276400 | -3.08900000 | H  | 4.28193700  | 2.27175800  | -0.88985900 |
| H | -0.04819100 | -4.22369200 | 0.02711000  | H  | 6.33600700  | 1.60767700  | -2.16019900 |

#### R=Me, face B, C2 TS

|                                              |                             |
|----------------------------------------------|-----------------------------|
| Zero-point correction=                       | 0.778973 (Hartree/Particle) |
| Thermal correction to Energy=                | 0.830333                    |
| Thermal correction to Enthalpy=              | 0.831277                    |
| Thermal correction to Gibbs Free Energy=     | 0.694069                    |
| Sum of electronic and zero-point Energies=   | -3212.178663                |
| Sum of electronic and thermal Energies=      | -3212.127303                |
| Sum of electronic and thermal Enthalpies=    | -3212.126359                |
| Sum of electronic and thermal Free Energies= | -3212.263566                |
| Electronic energy                            | -3213.74374185              |

|   |             |             |             |    |             |             |             |
|---|-------------|-------------|-------------|----|-------------|-------------|-------------|
| C | -0.68262100 | 3.57702400  | 0.90032900  | H  | -0.36091600 | -3.40587600 | -2.66260500 |
| C | 0.25273300  | 3.71023800  | 1.92977100  | H  | 0.50842800  | -2.82374300 | -4.10697400 |
| C | 0.84212000  | 4.51221000  | -0.62716200 | Ir | -0.02489900 | 0.10971300  | -0.15939900 |
| C | 1.83703000  | 4.44705500  | 0.36373800  | H  | -0.87785000 | 1.58850800  | -0.27434800 |
| H | -0.63732800 | 2.22395300  | 0.48166500  | H  | -0.52423900 | 0.05904300  | -1.68409100 |
| C | 4.47230000  | -2.66966600 | 1.88437500  | H  | 1.23589400  | 0.93180000  | -0.78770000 |
| C | 3.72969600  | -2.03770400 | 0.86392700  | H  | 0.05644500  | -4.15820200 | -0.59745600 |
| C | 2.37506200  | -2.41483100 | 0.68403500  | H  | -1.74413500 | 3.61423400  | 1.16846100  |
| C | 1.81685500  | -3.37949800 | 1.55181600  | C  | -0.05087700 | 3.51865800  | 3.37602000  |
| C | 2.54915300  | -3.98418600 | 2.58126800  | H  | -0.98916800 | 2.96096600  | 3.50701800  |
| C | 3.88884500  | -3.61760500 | 2.73633000  | H  | -0.15587200 | 4.51062800  | 3.85897300  |
| H | 5.51884800  | -2.38096300 | 2.02052300  | H  | 0.76084500  | 2.96796700  | 3.87272700  |
| H | 2.06833100  | -4.72682200 | 3.22350000  | C  | 4.42672800  | -1.02563600 | 0.02141400  |
| H | 4.48707100  | -4.07645800 | 3.53023300  | C  | 5.59865300  | -1.38693800 | -0.67874200 |
| O | 0.50504100  | -3.74169700 | 1.38052100  | C  | 3.96663400  | 0.30509800  | -0.05271200 |
| C | -0.02360500 | -3.31096100 | 0.11126900  | C  | 6.28068700  | -0.44624500 | -1.46221900 |
| P | 1.06949700  | -1.85593100 | -0.49194600 | H  | 5.96183800  | -2.41911400 | -0.61741400 |
| C | 1.55683300  | -2.35742200 | -2.26891600 | C  | 4.65476300  | 1.24340400  | -0.83529700 |
| C | 2.34554800  | -1.20630600 | -2.92308100 | H  | 3.07538600  | 0.59621500  | 0.51337000  |
| H | 2.53200300  | -1.46389500 | -3.98276300 | C  | 5.80640000  | 0.87191400  | -1.54525400 |
| H | 3.31868100  | -1.03795500 | -2.43708000 | H  | 7.18055100  | -0.74487400 | -2.01075900 |
| H | 1.77436600  | -0.26455100 | -2.88599900 | H  | 4.28193700  | 2.27175800  | -0.88985900 |
| C | 2.40393800  | -3.64313700 | -2.26108800 | H  | 6.33600700  | 1.60767700  | -2.16019900 |
| H | 2.63758700  | -3.92339900 | -3.30490700 | Cl | 0.93926200  | 0.63584700  | 2.10218600  |
| H | 1.87784800  | -4.49829200 | -1.80131300 | O  | 1.52093900  | 4.10132000  | 1.68754200  |
| H | 3.35691100  | -3.50071700 | -1.72567000 | O  | -0.47437700 | 4.22408200  | -0.35031300 |
| C | 0.25023600  | -2.57795100 | -3.06026900 | C  | 1.19467000  | 4.90716500  | -1.92147400 |
| H | -0.37220500 | -1.66733700 | -3.06789000 | H  | 0.41261600  | 4.94976500  | -2.68482200 |

|   |             |            |             |
|---|-------------|------------|-------------|
| H | -2.64783900 | 1.53718400 | -1.59551500 |
| C | -4.95844000 | 3.60278700 | -0.13387500 |
| H | -6.85302000 | 2.94844700 | 0.70021400  |
| H | -3.02366100 | 3.94203400 | -1.06571100 |
| H | -5.12583300 | 4.65921800 | 0.10162500  |

### R=CO<sub>2</sub>Me

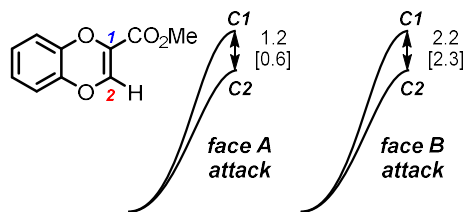

### R=CO<sub>2</sub>Me, face A, C1 TS

|                                              |                             |
|----------------------------------------------|-----------------------------|
| Zero-point correction=                       | 0.793125 (Hartree/Particle) |
| Thermal correction to Energy=                | 0.847468                    |
| Thermal correction to Enthalpy=              | 0.848412                    |
| Thermal correction to Gibbs Free Energy=     | 0.704605                    |
| Sum of electronic and zero-point Energies=   | -3400.526680                |
| Sum of electronic and thermal Energies=      | -3400.472337                |
| Sum of electronic and thermal Enthalpies=    | -3400.471393                |
| Sum of electronic and thermal Free Energies= | -3400.615200                |
| Electronic energy                            | -3402.16459362              |

|    |             |             |             |
|----|-------------|-------------|-------------|
| C  | 0.22966300  | 3.43719700  | 0.46586300  |
| C  | 1.01167600  | 3.22024800  | 1.62429900  |
| C  | 2.22046800  | 4.01013800  | -0.68816100 |
| C  | 2.96594300  | 3.80779800  | 0.48529200  |
| H  | -0.30860900 | 2.13769600  | 0.10984900  |
| C  | 4.44189100  | -2.75661500 | 1.95845600  |
| C  | 3.66822600  | -2.24966700 | 0.89214400  |
| C  | 2.28468100  | -2.55286000 | 0.86060700  |
| C  | 1.72798900  | -3.30767500 | 1.91741700  |
| C  | 2.49288000  | -3.78310600 | 2.98940000  |
| C  | 3.86226300  | -3.50164500 | 2.99459700  |
| H  | 5.51196900  | -2.52917700 | 1.97879700  |
| H  | 2.01335800  | -4.36577300 | 3.78034500  |
| H  | 4.48630900  | -3.86682200 | 3.81666500  |
| O  | 0.38368100  | -3.58228800 | 1.89096500  |
| C  | -0.18018000 | -3.39032700 | 0.57804600  |
| P  | 0.93283700  | -2.11350600 | -0.31317600 |
| C  | 1.27790500  | -2.88738900 | -2.02291600 |
| C  | 2.04215500  | -1.87115300 | -2.89420300 |
| H  | 2.15586200  | -2.29403600 | -3.91007300 |
| H  | 3.04729600  | -1.65728800 | -2.49964000 |
| H  | 1.49191400  | -0.91917400 | -2.97148800 |
| C  | 2.09552800  | -4.18407600 | -1.87982600 |
| H  | 2.22960600  | -4.63340600 | -2.88123400 |
| H  | 1.59513000  | -4.93678600 | -1.24553100 |
| H  | 3.09519700  | -3.99047800 | -1.45792900 |
| C  | -0.08704400 | -3.18201800 | -2.68015800 |
| H  | -0.69914100 | -2.26852900 | -2.77062300 |
| H  | -0.67418900 | -3.93714800 | -2.13098200 |
| H  | 0.08989900  | -3.57198200 | -3.69949800 |
| Ir | -0.04596300 | -0.06328000 | -0.20818400 |
| H  | -0.81926500 | 1.45865800  | -0.44748900 |
| H  | -0.58113700 | -0.26931900 | -1.70213500 |
| H  | 1.24739100  | 0.56552100  | -0.97010100 |
| H  | -0.14412500 | -4.36005700 | 0.04397800  |
| C  | 4.36149300  | -1.43233500 | -0.14349800 |

|    |             |             |             |
|----|-------------|-------------|-------------|
| C  | 5.43866800  | -1.98459000 | -0.86996300 |
| C  | 3.99674000  | -0.09011600 | -0.37421800 |
| C  | 6.11668000  | -1.22140400 | -1.83042800 |
| H  | 5.73101800  | -3.02456600 | -0.68588800 |
| C  | 4.68006600  | 0.67175000  | -1.33289500 |
| H  | 3.18274800  | 0.34952000  | 0.21041100  |
| C  | 5.73479200  | 0.10813500  | -2.06658000 |
| H  | 6.94184400  | -1.66715900 | -2.39618900 |
| H  | 4.38588900  | 1.71212300  | -1.50391400 |
| H  | 6.26230200  | 0.70580500  | -2.81767900 |
| Cl | 1.01416000  | 0.61099600  | 1.95460600  |
| O  | 2.34215500  | 3.38766400  | 1.66785800  |
| O  | 0.87248400  | 3.76457300  | -0.75448500 |
| C  | 2.87790800  | 4.46216100  | -1.83895700 |
| H  | 2.28808000  | 4.61543900  | -2.74698700 |
| C  | 4.33790000  | 4.04881500  | 0.52990300  |
| H  | 4.87247600  | 3.87450800  | 1.46785400  |
| C  | 4.99278800  | 4.50192600  | -0.62653400 |
| H  | 6.06979000  | 4.68910300  | -0.60110500 |
| C  | 4.26015200  | 4.70586800  | -1.80503100 |
| H  | 4.76304000  | 5.05673500  | -2.71129400 |
| C  | -1.64600700 | -2.99524700 | 0.75200400  |
| H  | -1.96057800 | -3.33745900 | 1.75458400  |
| P  | -2.02856800 | -1.12038300 | 0.57992500  |
| C  | -2.92942100 | -0.74606300 | 2.23314900  |
| C  | -1.93059300 | -1.02711300 | 3.37483800  |
| H  | -1.62725700 | -2.08713200 | 3.43159900  |
| H  | -1.01753700 | -0.41781800 | 3.27137900  |
| H  | -2.41342300 | -0.77197400 | 4.33723500  |
| C  | -3.28187900 | 0.75359900  | 2.23488500  |
| H  | -3.72230200 | 1.01878400  | 3.21531500  |
| H  | -2.38473400 | 1.37653300  | 2.08365600  |
| H  | -4.01815200 | 1.00772500  | 1.45471500  |
| C  | -4.20027000 | -1.59466700 | 2.39944400  |
| H  | -4.67189500 | -1.35668300 | 3.37171700  |
| H  | -4.93714100 | -1.39301200 | 1.60426400  |
| H  | -3.98693600 | -2.67853500 | 2.39734600  |
| C  | -3.36806500 | -1.55965900 | -0.63047800 |
| C  | -4.34922700 | -0.78199700 | -1.30145700 |
| C  | -3.35951000 | -2.95533100 | -0.85468800 |
| C  | -5.27896600 | -1.43866800 | -2.13976900 |
| C  | -4.27007900 | -3.60111500 | -1.70268200 |
| C  | -5.23710100 | -2.82380900 | -2.34339400 |
| H  | -6.02796400 | -0.83225300 | -2.65759800 |
| H  | -4.21078300 | -4.68507200 | -1.83262100 |
| H  | -5.96329200 | -3.29970800 | -3.01023100 |
| O  | -2.42326600 | -3.72518800 | -2.18505000 |
| C  | -4.48795500 | 0.69932900  | -1.19464600 |
| C  | -5.72946900 | 1.25728500  | -0.81622200 |
| C  | -3.44093800 | 1.56692900  | -1.56545300 |
| C  | -5.91339300 | 2.64639300  | -0.79286700 |
| H  | -6.55005300 | 0.58925500  | -0.53196400 |
| C  | -3.62768300 | 2.95609400  | -1.55058100 |
| H  | -2.48170000 | 1.14529300  | -1.87862300 |
| C  | -4.86224100 | 3.49993200  | -1.16181400 |
| H  | -6.88113400 | 3.06099400  | -0.49049500 |
| H  | -2.80582400 | 3.61913100  | -1.83635700 |
| H  | -5.00357500 | 4.58600600  | -1.15652300 |
| H  | 0.54901100  | 3.16960800  | 2.60710400  |
| C  | -1.04007900 | 4.22197900  | 0.64396100  |
| O  | -1.47596900 | 5.02283400  | -0.16777600 |
| O  | -1.65510100 | 3.88173100  | 1.81140500  |
| C  | -2.91171100 | 4.55592400  | 2.04465900  |
| H  | -3.64749200 | 4.26626700  | 1.27785500  |
| H  | -3.23663000 | 4.22024100  | 3.03864500  |
| H  | -2.77258700 | 5.64867000  | 2.02656400  |

**R=CO<sub>2</sub>Me, face A, C2 TS**

Zero-point correction= 0.792316 (Hartree/Particle)  
 Thermal correction to Energy= 0.846861  
 Thermal correction to Enthalpy= 0.847805  
 Thermal correction to Gibbs Free Energy= 0.703092  
 Sum of electronic and zero-point Energies= -3400.528464  
 Sum of electronic and thermal Energies= -3400.473919  
 Sum of electronic and thermal Enthalpies= -3400.472975  
 Sum of electronic and thermal Free Energies= -3400.617688  
 Electronic energy -3402.16499004

|    |             |             |             |
|----|-------------|-------------|-------------|
| C  | -1.26367300 | 3.01045600  | -1.33127600 |
| C  | -0.54679400 | 3.79180300  | -0.41051700 |
| C  | -3.23344000 | 3.45187400  | -0.11339200 |
| C  | -2.47008100 | 4.10995500  | 0.86703200  |
| H  | -0.91737400 | 1.69281100  | -1.06850100 |
| C  | 5.29898100  | 0.16594100  | 2.01473400  |
| C  | 4.44570000  | -0.07841500 | 0.91676500  |
| C  | 3.31167600  | -0.90434200 | 1.11600000  |
| C  | 3.06188500  | -1.41625100 | 2.40929900  |
| C  | 3.89370700  | -1.14577100 | 3.50291000  |
| C  | 5.02145600  | -0.34867200 | 3.28846800  |
| H  | 6.17754100  | 0.79923500  | 1.85893900  |
| H  | 3.65437200  | -1.56870100 | 4.48211900  |
| H  | 5.69326800  | -0.12555100 | 4.12364400  |
| O  | 1.96131100  | -2.21094600 | 2.60046900  |
| C  | 1.43087100  | -2.71041500 | 1.35736700  |
| P  | 1.96717000  | -1.47797500 | -0.00745000 |
| C  | 2.69682500  | -2.58377400 | -1.38133700 |
| C  | 3.03298200  | -1.70801600 | -2.60437200 |
| H  | 3.36110100  | -2.36632300 | -3.43058600 |
| H  | 3.84470600  | -0.99497500 | -2.39347200 |
| H  | 2.15128500  | -1.13775600 | -2.93930500 |
| C  | 3.95973600  | -3.31195900 | -0.88630800 |
| H  | 4.33558600  | -3.96523100 | -1.69551100 |
| H  | 3.76600000  | -3.95427200 | -0.00908200 |
| H  | 4.76161600  | -2.60351700 | -0.62183200 |
| C  | 1.60722300  | -3.60241000 | -1.77524900 |
| H  | 0.68420200  | -3.09792400 | -2.10820000 |
| H  | 1.34647500  | -4.29030100 | -0.95315400 |
| H  | 1.98210400  | -4.21421000 | -2.61655300 |
| Ir | 0.19202600  | -0.11934800 | -0.51209200 |
| H  | -1.21680700 | 0.63544100  | -1.09814200 |
| H  | -0.10049100 | -1.02991700 | -1.79987400 |
| H  | 1.15049000  | 0.69132800  | -1.55341000 |
| H  | 1.88857400  | -3.70083400 | 1.16502600  |
| H  | -0.88808700 | 3.01318100  | -2.36064300 |
| C  | 4.79957800  | 0.55193900  | -0.38572800 |
| C  | 6.06087800  | 0.30524800  | -0.97063400 |
| C  | 3.91892600  | 1.45463100  | -1.01554400 |
| C  | 6.42195100  | 0.92750800  | -2.17367100 |
| H  | 6.75191600  | -0.39022100 | -0.48094000 |
| C  | 4.28784800  | 2.08514900  | -2.21270300 |
| H  | 2.94743900  | 1.66600500  | -0.55886000 |
| C  | 5.53524600  | 1.81908100  | -2.79748300 |
| H  | 7.39816100  | 0.71570500  | -2.62310500 |
| H  | 3.58722600  | 2.78914800  | -2.67143600 |
| H  | 5.81939900  | 2.30804800  | -3.73552200 |
| Cl | 0.71821900  | 1.64305300  | 1.17292300  |
| O  | -1.10316300 | 4.35183200  | 0.68306000  |
| O  | -2.67665100 | 3.00757200  | -1.29671200 |
| C  | -4.60026500 | 3.25598700  | 0.10307600  |
| H  | -5.17643800 | 2.72399100  | -0.65884300 |

|   |             |             |             |
|---|-------------|-------------|-------------|
| C | -3.04867500 | 4.56207500  | 2.05083100  |
| H | -2.41306700 | 5.06322300  | 2.78619500  |
| C | -4.42329400 | 4.36528000  | 2.26511000  |
| H | -4.88234500 | 4.71948400  | 3.19239300  |
| C | -5.19298700 | 3.71638800  | 1.29129400  |
| H | -6.26313900 | 3.55495300  | 1.45220000  |
| C | -0.07314200 | -2.91428000 | 1.54016100  |
| H | -0.26605700 | -2.96393400 | 2.62683300  |
| P | -1.19084800 | -1.56286900 | 0.76474900  |
| C | -2.26325800 | -0.99533600 | 2.24764700  |
| C | -1.30642300 | -0.47690400 | 3.34208700  |
| H | -0.67981100 | -1.27433200 | 3.77875300  |
| H | -0.64096600 | 0.31448000  | 2.95770700  |
| H | -1.91236600 | -0.05136700 | 4.16414500  |
| C | -3.12781700 | 0.17708800  | 1.74625700  |
| H | -3.72718400 | 0.57745200  | 2.58536500  |
| H | -2.49165500 | 0.99267700  | 1.36563700  |
| H | -3.82497700 | -0.12453400 | 0.94671400  |
| C | -3.14645800 | -2.12993200 | 2.79026100  |
| H | -3.71908100 | -1.75869700 | 3.66104200  |
| H | -3.86647300 | -2.48859000 | 2.03609800  |
| H | -2.55475300 | -2.99791400 | 3.13299000  |
| C | -2.15387400 | -2.91105000 | -0.07326200 |
| C | -3.32421900 | -2.89998300 | -0.87728200 |
| C | -1.56113700 | -4.16112400 | 0.21809300  |
| C | -3.85813100 | -4.13312300 | -1.31648900 |
| C | -2.07994600 | -5.38103300 | -0.23776000 |
| C | -3.24481600 | -5.35379800 | -1.00694900 |
| H | -4.75836700 | -4.11593000 | -1.93795400 |
| H | -1.57422000 | -6.31389600 | 0.02549300  |
| H | -3.67689900 | -6.29036600 | -1.37387900 |
| O | -0.42568700 | -4.19648900 | 0.98093700  |
| C | -4.05499100 | -1.67831400 | -1.32611100 |
| C | -5.42996700 | -1.54154900 | -1.03326400 |
| C | -3.44116800 | -0.71932200 | -2.15719200 |
| C | -6.17120200 | -0.47208000 | -1.55294000 |
| H | -5.91495800 | -2.28574000 | -0.39204200 |
| C | -4.18607500 | 0.34485700  | -2.68376200 |
| H | -2.38032700 | -0.82373000 | -2.40187800 |
| C | -5.55165500 | 0.47116700  | -2.38715900 |
| H | -7.23616900 | -0.38180100 | -1.31359400 |
| H | -3.69677800 | 1.07687500  | -3.33346200 |
| H | -6.13316100 | 1.29626900  | -2.81307800 |
| C | 0.88132500  | 4.09240400  | -0.68116000 |
| O | 1.44301500  | 3.70820400  | -1.70536200 |
| O | 1.42965400  | 4.87717200  | 0.27000100  |
| C | 2.82636100  | 5.17039300  | 0.05973000  |
| H | 2.98012300  | 5.65108500  | -0.92011600 |
| H | 3.10399900  | 5.84959100  | 0.87667600  |
| H | 3.41998800  | 4.24317400  | 0.10435500  |

**R=CO<sub>2</sub>Me, face B, C1 TS**

Zero-point correction= 0.793372 (Hartree/Particle)  
 Thermal correction to Energy= 0.847635  
 Thermal correction to Enthalpy= 0.848579  
 Thermal correction to Gibbs Free Energy= 0.704766  
 Sum of electronic and zero-point Energies= -3400.527839  
 Sum of electronic and thermal Energies= -3400.473576  
 Sum of electronic and thermal Enthalpies= -3400.472632  
 Sum of electronic and thermal Free Energies= -3400.616445  
 Electronic energy -3402.16557714

|   |            |             |             |
|---|------------|-------------|-------------|
| C | 1.34150800 | -3.09859400 | -0.45586200 |
|---|------------|-------------|-------------|

|    |             |             |             |
|----|-------------|-------------|-------------|
| C  | 0.71575400  | -3.63666600 | 0.69657500  |
| C  | 3.38179200  | -3.07113300 | 0.75435100  |
| C  | 2.71420200  | -3.55149200 | 1.89349800  |
| H  | 0.93374700  | -1.75835200 | -0.52862900 |
| C  | -5.29443300 | -0.74612300 | 2.22085400  |
| C  | -4.46761800 | -0.55496500 | 1.09264000  |
| C  | -3.51252300 | 0.49127200  | 1.13010500  |
| C  | -3.39185800 | 1.26608000  | 2.30522400  |
| C  | -4.19360000 | 1.05321700  | 3.43326300  |
| C  | -5.15286500 | 0.03765000  | 3.37427900  |
| H  | -6.03662000 | -1.54952200 | 2.19165900  |
| H  | -4.06300600 | 1.68247800  | 4.31759600  |
| H  | -5.79761800 | -0.14740100 | 4.23955900  |
| O  | -2.44820800 | 2.26180600  | 2.34256700  |
| C  | -1.96965600 | 2.60960600  | 1.02736900  |
| P  | -2.25871200 | 1.07812500  | -0.08506800 |
| C  | -3.13316200 | 1.78341400  | -1.62866800 |
| C  | -3.30926400 | 0.65715800  | -2.66679400 |
| H  | -3.72245400 | 1.09472700  | -3.59509600 |
| H  | -4.00283700 | -0.12419100 | -2.31992300 |
| H  | -2.34376300 | 0.18124400  | -2.90392800 |
| C  | -4.50350300 | 2.38064600  | -1.26046700 |
| H  | -4.96803300 | 2.79931900  | -2.17246300 |
| H  | -4.42909000 | 3.20075800  | -0.52475100 |
| H  | -5.18472400 | 1.61616600  | -0.85234900 |
| C  | -2.21240600 | 2.87070400  | -2.22057300 |
| H  | -1.22589000 | 2.46012700  | -2.49559000 |
| H  | -2.05185600 | 3.71784700  | -1.53262500 |
| H  | -2.68140600 | 3.27021600  | -3.13885400 |
| Ir | -0.27305100 | -0.04181900 | -0.34320000 |
| H  | 1.24660800  | -0.68766300 | -0.72361000 |
| H  | -0.07688500 | 0.66587400  | -1.76258100 |
| H  | -1.05553300 | -1.15211100 | -1.24736500 |
| H  | -2.57274000 | 3.46324000  | 0.66053100  |
| C  | -4.65303700 | -1.46598500 | -0.07244400 |
| C  | -5.91319800 | -1.56032800 | -0.70233900 |
| C  | -3.59981700 | -2.28552400 | -0.52702300 |
| C  | -6.10524100 | -2.43234400 | -1.78289800 |
| H  | -6.73826500 | -0.93200100 | -0.34801400 |
| C  | -3.79462500 | -3.15898400 | -1.60638300 |
| H  | -2.63010400 | -2.23926300 | -0.02306600 |
| C  | -5.04451800 | -3.23019000 | -2.23979800 |
| H  | -7.08492800 | -2.48608700 | -2.26996200 |
| H  | -2.95642300 | -3.77523700 | -1.94639900 |
| H  | -5.19538900 | -3.90966000 | -3.08559400 |
| Cl | -0.58931100 | -1.55191700 | 1.64077000  |
| O  | 1.37199200  | -3.95189500 | 1.81840100  |
| O  | 2.76220800  | -2.95426700 | -0.46749100 |
| C  | 4.73095700  | -2.71252700 | 0.86335500  |
| H  | 5.23767300  | -2.31833700 | -0.02138700 |
| C  | 3.35747000  | -3.67416300 | 3.12293600  |
| H  | 2.78914600  | -4.04935900 | 3.97862500  |
| C  | 4.71118400  | -3.31664900 | 3.22587800  |
| H  | 5.22570400  | -3.41043900 | 4.18621300  |
| C  | 5.39038400  | -2.83971000 | 2.09588200  |
| H  | 6.44391600  | -2.55311900 | 2.16873400  |
| C  | -0.52094600 | 3.08311700  | 1.16429100  |
| H  | -0.37161600 | 3.37367000  | 2.21995200  |
| P  | 0.81716600  | 1.80271200  | 0.66266400  |
| C  | 1.91476700  | 1.70296300  | 2.22932200  |
| C  | 1.01501800  | 1.22685400  | 3.38883400  |
| H  | 0.23452000  | 1.96042700  | 3.65546700  |
| H  | 0.52081300  | 0.27042600  | 3.14995000  |
| H  | 1.64533400  | 1.07753900  | 4.28569700  |
| C  | 2.99626700  | 0.63693400  | 1.96489000  |
| H  | 3.60914200  | 0.50581900  | 2.87644600  |

|   |             |             |             |
|---|-------------|-------------|-------------|
| H | 2.53962100  | -0.33629900 | 1.72232000  |
| H | 3.67194800  | 0.91905000  | 1.14070700  |
| C | 2.56470800  | 3.05552100  | 2.56393600  |
| C | 3.15541500  | 2.95313100  | 3.49377400  |
| H | 3.24455000  | 3.39461300  | 1.76466800  |
| H | 1.81898300  | 3.85258700  | 2.73522200  |
| C | 1.58732200  | 3.09631800  | -0.41957400 |
| C | 2.77031400  | 3.10980800  | -1.20589100 |
| C | 0.79910000  | 4.26871200  | -0.37924700 |
| C | 3.12093400  | 4.30165400  | -1.87991300 |
| C | 1.13893500  | 5.44228200  | -1.06683700 |
| C | 2.31746800  | 5.44750400  | -1.81614100 |
| H | 4.03145800  | 4.30570200  | -2.48655100 |
| H | 0.48945100  | 6.31866900  | -0.99287300 |
| H | 2.61130900  | 6.35064100  | -2.36069600 |
| O | -0.35241800 | 4.27152300  | 0.36204800  |
| C | 3.68917500  | 1.94873100  | -1.39429600 |
| C | 5.06283900  | 2.08552900  | -1.09416000 |
| C | 3.24199100  | 0.74576800  | -1.97625600 |
| C | 5.96074800  | 1.04274300  | -1.35813500 |
| H | 5.42096200  | 3.01861200  | -0.64528700 |
| C | 4.13990600  | -0.29773000 | -2.24092200 |
| H | 2.18459500  | 0.63487400  | -2.22956400 |
| C | 5.50165700  | -0.15120400 | -1.93600300 |
| H | 7.02180700  | 1.16545100  | -1.11576900 |
| H | 3.76592000  | -1.22869500 | -2.67871400 |
| H | 6.20586600  | -0.96144500 | -2.15597600 |
| H | -0.28684200 | -4.05546000 | 0.63501600  |
| C | 0.74464800  | -3.53497200 | -1.75738500 |
| O | -0.40610600 | -3.94156500 | -1.87404300 |
| O | 1.60344800  | -3.33954700 | -2.78746800 |
| C | 1.04457600  | -3.65420000 | -4.08198500 |
| H | 0.72429100  | -4.70754800 | -4.12067000 |
| H | 0.17896700  | -3.00620800 | -4.29266100 |
| H | 1.85522000  | -3.46740400 | -4.79886400 |

### R=CO<sub>2</sub>Me, face B, C2 TS

|                                              |                |                    |
|----------------------------------------------|----------------|--------------------|
| Zero-point correction=                       | 0.793336       | (Hartree/Particle) |
| Thermal correction to Energy=                | 0.847653       |                    |
| Thermal correction to Enthalpy=              | 0.848597       |                    |
| Thermal correction to Gibbs Free Energy=     | 0.705018       |                    |
| Sum of electronic and zero-point Energies=   | -3400.530718   |                    |
| Sum of electronic and thermal Energies=      | -3400.476400   |                    |
| Sum of electronic and thermal Enthalpies=    | -3400.475456   |                    |
| Sum of electronic and thermal Free Energies= | -3400.619035   |                    |
| Electronic energy                            | -3402.16930060 |                    |

|   |             |             |             |
|---|-------------|-------------|-------------|
| C | -1.05523100 | 3.00458600  | 0.18925900  |
| C | -0.10268400 | 3.59977100  | 1.03449000  |
| C | 0.06399700  | 3.90474800  | -1.67135100 |
| C | 1.14537600  | 4.23584200  | -0.83308200 |
| H | -0.70746500 | 1.71821600  | 0.05081400  |
| C | 4.73322100  | -1.97127600 | 2.19104100  |
| C | 3.97741700  | -1.59979600 | 1.05848400  |
| C | 2.67251400  | -2.13552300 | 0.92100800  |
| C | 2.16537000  | -2.98045600 | 1.93296400  |
| C | 2.90999100  | -3.32505100 | 3.06693100  |
| C | 4.20496700  | -2.80997800 | 3.18233900  |
| H | 5.74223200  | -1.56253100 | 2.30006800  |
| H | 2.47528300  | -3.98629300 | 3.82106800  |
| H | 4.81123900  | -3.06466500 | 4.05758200  |
| O | 0.89365900  | -3.47947500 | 1.79748400  |
| C | 0.38995400  | -3.33688300 | 0.45602300  |
| P | 1.37299000  | -1.91204300 | -0.35561100 |

|    |             |             |             |   |             |             |             |
|----|-------------|-------------|-------------|---|-------------|-------------|-------------|
| C  | 1.97485500  | -2.62853800 | -2.02386100 | O | -1.69693800 | -3.84759900 | -0.59595600 |
| C  | 2.62292200  | -1.50163600 | -2.85135700 | C | -4.69933000 | 0.11010900  | -0.82673600 |
| H  | 2.89428500  | -1.90597200 | -3.84446600 | C | -5.94378800 | 0.29562000  | -0.18642000 |
| H  | 3.53700900  | -1.11052400 | -2.38020200 | C | -3.95038900 | 1.24739600  | -1.18865400 |
| H  | 1.92411300  | -0.66123300 | -2.99547400 | C | -6.41169300 | 1.58282700  | 0.11199100  |
| C  | 2.98803800  | -3.76224700 | -1.77822100 | H | -6.53860300 | -0.58261500 | 0.08775100  |
| H  | 3.27914200  | -4.19689500 | -2.75221900 | C | -4.42548600 | 2.53564000  | -0.90251100 |
| H  | 2.57163100  | -4.57899000 | -1.16271400 | H | -2.99776500 | 1.11996900  | -1.71033300 |
| H  | 3.90140800  | -3.39340200 | -1.28416800 | C | -5.65257500 | 2.70727700  | -0.24430000 |
| C  | 0.75069800  | -3.16893100 | -2.79125500 | H | -7.37255300 | 1.70650100  | 0.62254900  |
| H  | -0.00085700 | -2.38194200 | -2.97312200 | H | -3.83054300 | 3.40375500  | -1.20517800 |
| H  | 0.24855700  | -4.00424500 | -2.27623200 | H | -6.01852900 | 3.71347800  | -0.01541500 |
| H  | 1.09321100  | -3.53634800 | -3.77607200 | C | -0.29872000 | 3.61590400  | 2.49626100  |
| Ir | -0.01870400 | 0.00387200  | -0.39541400 | O | 0.76539600  | 4.15358300  | 3.14579500  |
| H  | -0.99220000 | 0.87329600  | -1.35927200 | O | -1.33621100 | 3.24272900  | 3.04263900  |
| H  | -0.35352500 | -0.64975900 | -1.83454200 | C | 0.62313900  | 4.16837300  | 4.57812500  |
| H  | 1.13152600  | 0.85802800  | -1.16309300 | H | 1.53139100  | 4.65810500  | 4.95486400  |
| H  | 0.58949000  | -4.28221700 | -0.08698100 | H | -0.27749100 | 4.72895600  | 4.87766800  |
| H  | -2.05963400 | 2.88550400  | 0.60839600  | H | 0.54769100  | 3.13901700  | 4.96543200  |
| C  | 4.60217900  | -0.68112500 | 0.06522600  |   |             |             |             |
| C  | 5.83747300  | -1.02440300 | -0.52692400 |   |             |             |             |
| C  | 4.00316200  | 0.55226900  | -0.26577600 |   |             |             |             |
| C  | 6.44673800  | -0.16693300 | -1.45308600 |   |             |             |             |
| H  | 6.30860000  | -1.97917400 | -0.26744400 |   |             |             |             |
| C  | 4.61901400  | 1.40857600  | -1.18961700 |   |             |             |             |
| H  | 3.06336500  | 0.83883600  | 0.21713700  |   |             |             |             |
| C  | 5.83558900  | 1.05088700  | -1.78979700 |   |             |             |             |
| H  | 7.39804800  | -0.45259500 | -1.91465000 |   |             |             |             |
| H  | 4.13703400  | 2.35935300  | -1.44183200 |   |             |             |             |
| H  | 6.30981700  | 1.71999600  | -2.51578700 |   |             |             |             |
| Cl | 0.96912400  | 0.76787100  | 1.74373300  |   |             |             |             |
| O  | 1.05438300  | 4.12675400  | 0.55516800  |   |             |             |             |
| O  | -1.12732900 | 3.42715200  | -1.16610300 |   |             |             |             |
| C  | 0.19033600  | 4.07665600  | -3.05268100 |   |             |             |             |
| H  | -0.65805900 | 3.81000700  | -3.68975200 |   |             |             |             |
| C  | 2.33694800  | 4.73165100  | -1.36347200 |   |             |             |             |
| H  | 3.14868100  | 4.98474500  | -0.67512500 |   |             |             |             |
| C  | 2.46055300  | 4.90136800  | -2.75294200 |   |             |             |             |
| H  | 3.39377000  | 5.29132700  | -3.16952500 |   |             |             |             |
| C  | 1.38642100  | 4.57816300  | -3.59255700 |   |             |             |             |
| H  | 1.47331200  | 4.70845300  | -4.67538400 |   |             |             |             |
| C  | -1.12634200 | -3.15401100 | 0.53258800  |   |             |             |             |
| H  | -1.47377000 | -3.65972800 | 1.45353100  |   |             |             |             |
| P  | -1.77829900 | -1.34407200 | 0.50710000  |   |             |             |             |
| C  | -2.58643300 | -1.16937800 | 2.23732300  |   |             |             |             |
| C  | -1.49268100 | -1.46286600 | 3.28663100  |   |             |             |             |
| H  | -1.14894300 | -2.51088800 | 3.26895200  |   |             |             |             |
| H  | -0.61668800 | -0.80715200 | 3.14901200  |   |             |             |             |
| H  | -1.91378500 | -1.26924600 | 4.29114600  |   |             |             |             |
| C  | -3.06022700 | 0.28687300  | 2.40921800  |   |             |             |             |
| H  | -3.51114400 | 0.39341300  | 3.41386900  |   |             |             |             |
| H  | -2.22407700 | 1.00103300  | 2.35165500  |   |             |             |             |
| H  | -3.82724100 | 0.56862200  | 1.67024900  |   |             |             |             |
| C  | -3.77235900 | -2.13480900 | 2.40306300  |   |             |             |             |
| H  | -4.17608400 | -2.03103700 | 3.42767400  |   |             |             |             |
| H  | -4.58579800 | -1.91187000 | 1.69300800  |   |             |             |             |
| H  | -3.48560600 | -3.19323900 | 2.26974200  |   |             |             |             |
| C  | -3.09774000 | -1.90575000 | -0.66796400 |   |             |             |             |
| C  | -4.25485200 | -1.27001500 | -1.18622400 |   |             |             |             |
| C  | -2.81025200 | -3.22190200 | -1.09471700 |   |             |             |             |
| C  | -5.07351600 | -1.98415800 | -2.08993100 |   |             |             |             |
| C  | -3.61026100 | -3.92003000 | -2.00837800 |   |             |             |             |
| C  | -4.75189700 | -3.28360500 | -2.50307900 |   |             |             |             |
| H  | -5.96753900 | -1.48976000 | -2.48157500 |   |             |             |             |
| H  | -3.33815000 | -4.93870500 | -2.29758600 |   |             |             |             |
| H  | -5.40020200 | -3.80636900 | -3.21357300 |   |             |             |             |

### Stereoselectivity of the C2 protonations.

R=Me

#### Conformational analysis of the transition states

Due to  $C_2$  symmetry of the ligand, there are two quadrants across which the substrate can be positioned:

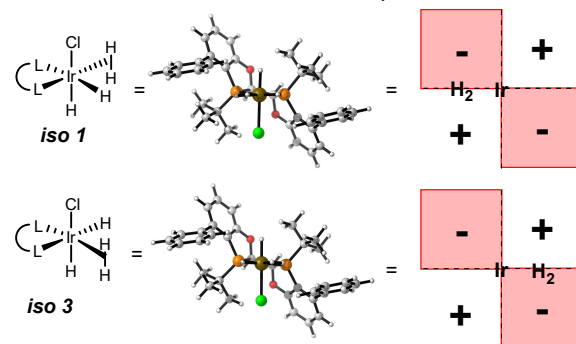

This contributes to 2 TS conformations with different substrate orientation. For each of those, there 2 distinct ways of interaction with the hydrogen. This is because  $H_2$  in reactive conformation is positioned perpendicular to the  $L_2IrH$  plane:

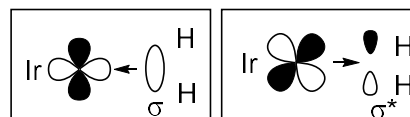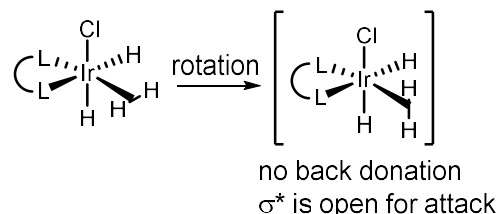



This opens the  $\sigma^*$  orbital of the  $H_2$  for the attack by incoming nucleophile (substrate). Such orientation creates the possibility of the attack on the top or bottom hydrogen atom, producing 2 possibilities mentioned above. Finally, the substrate can attack with **2** different faces.

This gives a total of  $2^3=8$  conformations for each Ir complex isomer, bringing the overall number of conformations for given substrate to **16**.

This formal analysis accounts for some transition states where approach of the substrate is not optimal. Such transition states quickly converged to other, more stable transition states, during optimization, reducing the total number of available conformers. Finally, some transition states proved to be very hard to converge and, despite our best efforts, didn't allow us to locate stationary points. This suggests very shallow PES around TS region. For those TSs we estimated free energies by analyzing the structures with frozen TS core. Importantly, most of these structures satisfy the single negative frequency requirement. The analysis produced the following energy-level diagram:

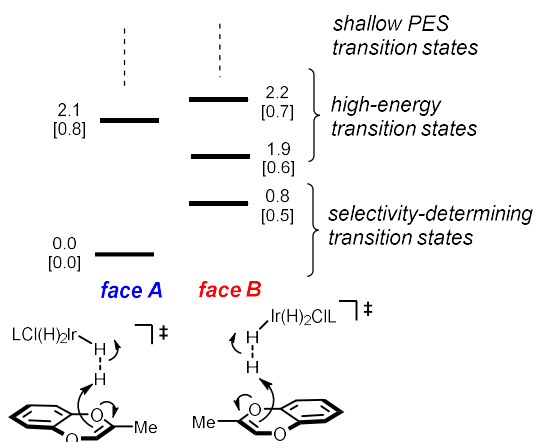

According to this, two conformations control the selectivity of the overall process:

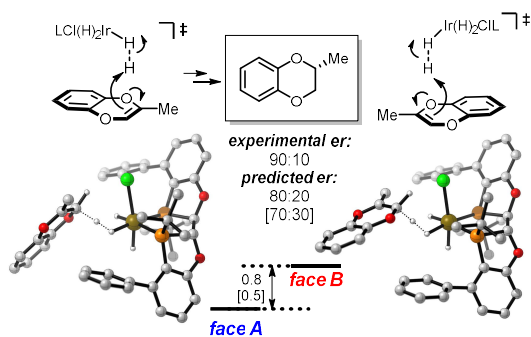

### R=Me, face A, lowest energy TS

Optimization of this TS structure proved to be unsuccessful with various algorithms, grid sizes and step sizes. This suggests very shallow PES around TS. Located structure satisfies single negative frequency requirement.

Zero-point correction= 0.778518 (Hartree/Particle)

Thermal correction to Energy= 0.829965  
 Thermal correction to Enthalpy= 0.830909  
 Thermal correction to Gibbs Free Energy= 0.691747  
 Sum of electronic and zero-point Energies= -3212.180928  
 Sum of electronic and thermal Energies= -3212.129481  
 Sum of electronic and thermal Enthalpies= -3212.128537  
 Sum of electronic and thermal Free Energies= -3212.267699  
 Electronic energy -3213.74437624

|    |             |             |             |
|----|-------------|-------------|-------------|
| C  | 1.41422800  | 2.87856900  | -1.18498700 |
| C  | 2.62066400  | 2.90516400  | -1.86460900 |
| C  | 2.31190100  | 4.24158800  | 0.49684400  |
| C  | 3.57540700  | 4.13994800  | -0.11297700 |
| H  | 1.41665400  | 1.53558500  | -0.72249900 |
| C  | -5.55073100 | 0.39634500  | -1.70717600 |
| C  | -4.48056700 | 0.62852700  | -0.81693800 |
| C  | -3.65208200 | -0.46548100 | -0.45990200 |
| C  | -3.90719800 | -1.72951600 | -1.03558200 |
| C  | -4.95312800 | -1.94968900 | -1.94087200 |
| C  | -5.77601200 | -0.86841300 | -2.26810300 |
| H  | -6.19151200 | 1.23954000  | -1.98220000 |
| H  | -5.10882500 | -2.94886300 | -2.35624300 |
| H  | -6.60379100 | -1.01189000 | -2.97013500 |
| O  | -3.10248000 | -2.78692800 | -0.69325800 |
| C  | -2.29656800 | -2.51259200 | 0.46904400  |
| P  | -2.18682100 | -0.60893500 | 0.64923700  |
| C  | -2.73132200 | -0.29079000 | 2.45395300  |
| C  | -2.55586200 | 1.20451400  | 2.78514800  |
| H  | -2.79371000 | 1.35793500  | 3.85468100  |
| H  | -3.22667400 | 1.84533600  | 2.19240200  |
| H  | -1.51848400 | 1.53183800  | 2.60695400  |
| C  | -4.19934200 | -0.70766600 | 2.65992700  |
| H  | -4.47002700 | -0.55352500 | 3.72111900  |
| H  | -4.37701300 | -1.77225800 | 2.42635100  |
| H  | -4.88475200 | -0.10360700 | 2.04294200  |
| C  | -1.80280600 | -1.11340800 | 3.37198100  |
| H  | -0.74317300 | -0.85401500 | 3.20828500  |
| H  | -1.91309100 | -2.20226900 | 3.23475300  |
| H  | -2.05225600 | -0.88185900 | 4.42406400  |
| Ir | -0.13419700 | 0.10475100  | -0.02656000 |
| H  | 1.48594000  | 0.53874300  | -0.38257300 |
| H  | 0.38691200  | 0.03601000  | 1.48662300  |
| H  | -0.58606500 | 1.60981600  | 0.41828600  |
| H  | -2.81205600 | -2.94450300 | 1.34871300  |
| H  | 0.49377500  | 2.65748200  | -1.74923700 |
| C  | 2.85275800  | 2.13999700  | -3.11874900 |
| C  | 3.29178500  | 2.79461600  | -3.89295500 |
| H  | 1.90419000  | 1.71373900  | -3.48188800 |
| H  | 3.56611900  | 1.31455100  | -2.93556200 |
| C  | -4.29339600 | 2.01129000  | -0.29467700 |
| C  | -5.35291600 | 2.66524400  | 0.37141500  |
| C  | -3.08139200 | 2.70241000  | -0.49670100 |
| C  | -5.19345300 | 3.97215800  | 0.85230800  |
| H  | -6.29896100 | 2.13380400  | 0.52517000  |
| C  | -2.92701900 | 4.00982800  | -0.01514000 |
| H  | -2.27389400 | 2.20747800  | -1.04618900 |
| C  | -3.97671800 | 4.64625400  | 0.66415800  |
| H  | -6.01961600 | 4.46284300  | 1.37805700  |
| H  | -1.97493600 | 4.52887100  | -0.17151200 |
| H  | -3.85090000 | 5.66658900  | 1.04213900  |
| Cl | -0.75501900 | 0.66097600  | -2.43485300 |
| O  | 3.74494400  | 3.46128700  | -1.33478800 |
| O  | 1.17927300  | 3.69374400  | -0.06629400 |
| C  | 2.19308200  | 4.93211400  | 1.70693100  |
| H  | 1.20452200  | 4.99991000  | 2.17004100  |
| C  | 4.70579000  | 4.70978300  | 0.46837100  |



|   |             |             |             |    |             |             |             |
|---|-------------|-------------|-------------|----|-------------|-------------|-------------|
| H | 5.66849000  | 4.60657300  | -0.04077200 | H  | -5.99383600 | -2.54846300 | 1.80638000  |
| C | 4.58182700  | 5.40349300  | 1.68392300  | H  | -5.05661100 | 1.30573800  | 3.57188500  |
| H | 5.46683000  | 5.85243700  | 2.14326700  | H  | -6.37125800 | -0.84807600 | 3.59102100  |
| C | 3.32698600  | 5.51401800  | 2.29655000  | O  | -3.28616300 | 1.92951400  | 1.76034500  |
| H | 3.22203500  | 6.05106300  | 3.24385700  | C  | -2.65951200 | 2.17280300  | 0.48597900  |
| C | -0.96248600 | -3.23772200 | 0.30325100  | P  | -2.44726200 | 0.47127900  | -0.37169000 |
| H | -1.12337300 | -4.08188700 | -0.39355900 | C  | -3.19679100 | 0.74483400  | -2.10797400 |
| P | 0.49004200  | -2.15087600 | -0.31865600 | C  | -2.96935900 | -0.52132300 | -2.95622600 |
| C | 0.93310900  | -2.94404800 | -2.00577800 | H  | -3.30692600 | -0.32135400 | -3.99065600 |
| C | -0.34678500 | -2.94295100 | -2.86988700 | H  | -3.53489300 | -1.38539600 | -2.57454900 |
| H | -1.13990500 | -3.59599200 | -2.46792100 | H  | -1.90122900 | -0.79180300 | -2.98219800 |
| H | -0.75489500 | -1.92437700 | -2.98331000 | C  | -4.70066900 | 1.06102600  | -2.01615500 |
| H | -0.08700800 | -3.32262400 | -3.87623100 | H  | -5.09160800 | 1.24811700  | -3.03363400 |
| C | 1.97758400  | -2.03057900 | -2.67934500 | H  | -4.90900600 | 1.96185700  | -1.41209600 |
| H | 2.19181800  | -2.41763500 | -3.69370200 | H  | -5.26865900 | 0.22160000  | -1.58246700 |
| H | 1.58198200  | -1.00552400 | -2.77730500 | C  | -2.43864300 | 1.92210800  | -2.75688300 |
| H | 2.92832800  | -1.99921000 | -2.12276500 | H  | -1.35474100 | 1.72301200  | -2.80876200 |
| C | 1.47955000  | -4.37188100 | -1.84774600 | H  | -2.58700100 | 2.87586700  | -2.22240800 |
| H | 1.67695300  | -4.79719100 | -2.84985200 | H  | -2.81009100 | 2.05665100  | -3.78970700 |
| H | 2.42389700  | -4.39195800 | -1.27854000 | Ir | -0.26240800 | -0.18612900 | -0.19958800 |
| H | 0.76390100  | -5.04355900 | -1.34044900 | H  | 1.40190200  | -0.54124500 | -0.31526900 |
| C | 1.55952600  | -2.94929500 | 0.96657400  | H  | 0.01754400  | 0.36395300  | -1.67664400 |
| C | 2.95116900  | -2.88614200 | 1.22768200  | H  | -0.61690500 | -1.57105700 | -1.00025000 |
| C | 0.75222000  | -3.73269000 | 1.82174200  | H  | -3.34164700 | 2.80693200  | -0.11335900 |
| C | 3.47601300  | -3.63032700 | 2.30731800  | H  | 1.57033700  | -2.21160500 | 1.77714300  |
| C | 1.26992500  | -4.45119600 | 2.90801700  | C  | 0.76905000  | -4.09908100 | -0.07896000 |
| C | 2.64689500  | -4.39397300 | 3.13999900  | H  | 0.11643000  | -4.04675000 | 0.80897800  |
| H | 4.55208700  | -3.58152700 | 2.49984700  | H  | 0.82179900  | -5.12169800 | -0.48245000 |
| H | 0.59762100  | -5.04439800 | 3.53378200  | H  | 0.29480700  | -3.42082000 | -0.82435600 |
| H | 3.07938700  | -4.95072400 | 3.97756200  | C  | -4.30363400 | -2.49846800 | -0.22859600 |
| O | -0.59545200 | -3.79256300 | 1.58426900  | C  | -5.41226500 | -2.95137700 | -0.97609200 |
| C | 3.91900400  | -2.08042500 | 0.42542600  | C  | -3.05654000 | -3.13318500 | -0.40045000 |
| C | 4.96262500  | -2.72457700 | -0.27343900 | C  | -5.27397600 | -4.00010600 | -1.89540600 |
| C | 3.86776200  | -0.67211300 | 0.41958800  | H  | -6.38387000 | -2.46327900 | -0.84017700 |
| C | 5.91288500  | -1.98143900 | -0.98718800 | C  | -2.92622200 | -4.18776600 | -1.31515000 |
| H | 5.01659700  | -3.81873800 | -0.26111400 | H  | -2.20474600 | -2.79598500 | 0.19961800  |
| C | 4.82591700  | 0.07090000  | -0.28534900 | C  | -4.02770800 | -4.62092300 | -2.06834600 |
| H | 3.07691700  | -0.16613800 | 0.98102400  | H  | -6.14049900 | -4.33212700 | -2.47715100 |
| C | 5.84544400  | -0.58015200 | -0.99692900 | H  | -1.95498700 | -4.67925500 | -1.43925000 |
| H | 6.70862000  | -2.49850100 | -1.53378400 | H  | -3.91746600 | -5.44244700 | -2.78413500 |
| H | 4.78268600  | 1.16522900  | -0.27161200 | Cl | -0.62104600 | -1.45553200 | 1.97018400  |
| H | 6.59185500  | 0.00274500  | -1.54694800 | O  | 3.13332800  | -4.23030700 | -0.37476900 |

### R=Me, face B, lowest energy TS

Zero-point correction= 0.777427 (Hartree/Particle)  
 Thermal correction to Energy= 0.829117  
 Thermal correction to Enthalpy= 0.830061  
 Thermal correction to Gibbs Free Energy= 0.691418  
 Sum of electronic and zero-point Energies= -3212.181346  
 Sum of electronic and thermal Energies= -3212.129656  
 Sum of electronic and thermal Enthalpies= -3212.128712  
 Sum of electronic and thermal Free Energies= -3212.267354  
 Electronic energy -3213.74275520

|   |             |             |             |
|---|-------------|-------------|-------------|
| C | 2.30392200  | -2.39774500 | 0.96160300  |
| C | 2.12030400  | -3.58695700 | 0.23949000  |
| C | 4.64266100  | -2.65303100 | 0.73734900  |
| C | 4.43552800  | -3.76455900 | -0.09799700 |
| H | 1.72122000  | -1.47731400 | 0.21076900  |
| C | -5.43231300 | -1.60941700 | 1.79461900  |
| C | -4.47847300 | -1.40961200 | 0.77328400  |
| C | -3.75401300 | -0.19184200 | 0.75241100  |
| C | -3.98858200 | 0.75283900  | 1.77614700  |
| C | -4.91381100 | 0.53906400  | 2.80574300  |
| C | -5.63767800 | -0.65610300 | 2.80133100  |

|    |             |             |             |
|----|-------------|-------------|-------------|
| H  | -5.99383600 | -2.54846300 | 1.80638000  |
| H  | -5.05661100 | 1.30573800  | 3.57188500  |
| H  | -6.37125800 | -0.84807600 | 3.59102100  |
| O  | -3.28616300 | 1.92951400  | 1.76034500  |
| C  | -2.65951200 | 2.17280300  | 0.48597900  |
| P  | -2.44726200 | 0.47127900  | -0.37169000 |
| C  | -3.19679100 | 0.74483400  | -2.10797400 |
| C  | -2.96935900 | -0.52132300 | -2.95622600 |
| H  | -3.30692600 | -0.32135400 | -3.99065600 |
| H  | -3.53489300 | -1.38539600 | -2.57454900 |
| H  | -1.90122900 | -0.79180300 | -2.98219800 |
| C  | -4.70066900 | 1.06102600  | -2.01615500 |
| H  | -5.09160800 | 1.24811700  | -3.03363400 |
| H  | -4.90900600 | 1.96185700  | -1.41209600 |
| H  | -5.26865900 | 0.22160000  | -1.58246700 |
| C  | -2.43864300 | 1.92210800  | -2.75688300 |
| H  | -1.35474100 | 1.72301200  | -2.80876200 |
| H  | -2.58700100 | 2.87586700  | -2.22240800 |
| H  | -2.81009100 | 2.05665100  | -3.78970700 |
| Ir | -0.26240800 | -0.18612900 | -0.19958800 |
| H  | 1.40190200  | -0.54124500 | -0.31526900 |
| H  | 0.01754400  | 0.36395300  | -1.67664400 |
| H  | -0.61690500 | -1.57105700 | -1.00025000 |
| H  | -3.34164700 | 2.80693200  | -0.11335900 |
| H  | 1.57033700  | -2.21160500 | 1.77714300  |
| C  | 0.76905000  | -4.09908100 | -0.07896000 |
| H  | 0.11643000  | -4.04675000 | 0.80897800  |
| H  | 0.82179900  | -5.12169800 | -0.48245000 |
| H  | 0.29480700  | -3.42082000 | -0.82435600 |
| C  | -4.30363400 | -2.49846800 | -0.22859600 |
| C  | -5.41226500 | -2.95137700 | -0.97609200 |
| C  | -3.05654000 | -3.13318500 | -0.40045000 |
| C  | -5.27397600 | -4.00010600 | -1.89540600 |
| H  | -6.38387000 | -2.46327900 | -0.84017700 |
| C  | -2.92622200 | -4.18776600 | -1.31515000 |
| H  | -2.20474600 | -2.79598500 | 0.19961800  |
| C  | -4.02770800 | -4.62092300 | -2.06834600 |
| H  | -6.14049900 | -4.33212700 | -2.47715100 |
| H  | -1.95498700 | -4.67925500 | -1.43925000 |
| H  | -3.91746600 | -5.44244700 | -2.78413500 |
| Cl | -0.62104600 | -1.45553200 | 1.97018400  |
| O  | 3.13332800  | -4.23030700 | -0.37476900 |
| O  | 3.60694000  | -1.95839700 | 1.30894800  |
| C  | 5.95554800  | -2.24701200 | 1.00550600  |
| H  | 6.10571700  | -1.38042900 | 1.65516600  |
| C  | 5.49919200  | -4.46040600 | -0.66690000 |
| H  | 5.28413900  | -5.31997300 | -1.30818100 |
| C  | 6.81406600  | -4.04445400 | -0.39919900 |
| H  | 7.65459500  | -4.58498300 | -0.84279500 |
| C  | 7.03540000  | -2.94272600 | 0.43824000  |
| H  | 8.05626200  | -2.61451200 | 0.65609100  |
| C  | -1.37719000 | 2.96645300  | 0.73797400  |
| H  | -1.46310000 | 3.41994400  | 1.74191600  |
| P  | 0.25252000  | 1.95532700  | 0.63733800  |
| C  | 1.06446600  | 2.30536700  | 2.34013400  |
| C  | 0.09474300  | 1.78838100  | 3.42336400  |
| H  | -0.85533200 | 2.34980900  | 3.45229000  |
| H  | -0.14185700 | 0.72100100  | 3.27603300  |
| H  | 0.57481300  | 1.90684500  | 4.41329500  |
| C  | 2.36984400  | 1.48926400  | 2.41068000  |
| H  | 2.82922800  | 1.63076000  | 3.40745300  |
| H  | 2.17333800  | 0.41274400  | 2.27961300  |
| H  | 3.10538900  | 1.80380700  | 1.65246800  |
| C  | 1.35678400  | 3.80174300  | 2.54067500  |
| H  | 1.78832000  | 3.95515100  | 3.54780300  |
| H  | 2.07664400  | 4.18583900  | 1.79875500  |

|   |             |             |             |
|---|-------------|-------------|-------------|
| H | 0.44376500  | 4.42070200  | 2.47819000  |
| C | 0.92253400  | 3.24726600  | -0.51649000 |
| C | 2.19427300  | 3.43125800  | -1.11990200 |
| C | -0.08268600 | 4.20509200  | -0.78194000 |
| C | 2.40644200  | 4.57208200  | -1.92667700 |
| C | 0.12291600  | 5.32413500  | -1.60124800 |
| C | 1.38617700  | 5.50093000  | -2.16937300 |
| H | 3.38903100  | 4.70492400  | -2.38922400 |
| H | -0.69609000 | 6.02950900  | -1.76576000 |
| H | 1.57791100  | 6.36760400  | -2.81026400 |
| O | -1.32002000 | 4.04359400  | -0.22027300 |
| C | 3.35196100  | 2.50000600  | -0.97904700 |
| C | 4.58063000  | 2.98035100  | -0.47575600 |
| C | 3.28424800  | 1.17287700  | -1.44766500 |
| C | 5.70875000  | 2.15009800  | -0.42661400 |
| H | 4.64210400  | 4.01360100  | -0.11647100 |
| C | 4.41618900  | 0.34753200  | -1.40617900 |
| H | 2.34075500  | 0.79691200  | -1.85241800 |
| C | 5.63021000  | 0.83033800  | -0.89539300 |
| H | 6.65153200  | 2.53812200  | -0.02616600 |
| H | 4.35210900  | -0.67823800 | -1.78503200 |
| H | 6.50967100  | 0.17896500  | -0.86611800 |

### R=CO<sub>2</sub>Me

#### Conformational analysis of the transition states

Due to the intramolecular nature of the transition states with carboxymethyl substrate, the available number of conformations goes down from 16 to 4. Thus, quadrant positioning of the substrate cannot be altered. Also, the reaction can only proceed with the hydrogen atom of the H<sub>2</sub> fragment that is pointing towards the substrate.

This leaves the conformations that correspond to face A and face B reactivity of the iso 1 and iso 2 Ir complexes, giving the following energy diagram:

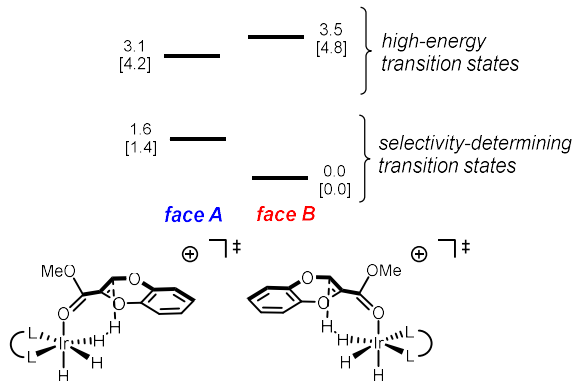

Two conformations control the selectivity of the process:

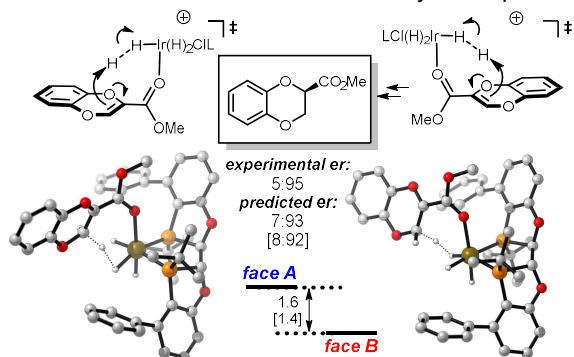

### R=CO<sub>2</sub>Me, face A, lowest energy TS

|                                              |                             |
|----------------------------------------------|-----------------------------|
| Zero-point correction=                       | 0.793150 (Hartree/Particle) |
| Thermal correction to Energy=                | 0.845467                    |
| Thermal correction to Enthalpy=              | 0.846411                    |
| Thermal correction to Gibbs Free Energy=     | 0.706520                    |
| Sum of electronic and zero-point Energies=   | -2940.308714                |
| Sum of electronic and thermal Energies=      | -2940.256397                |
| Sum of electronic and thermal Enthalpies=    | -2940.255453                |
| Sum of electronic and thermal Free Energies= | -2940.395344                |
| Electronic energy                            | -2941.93118781              |

|    |             |             |             |
|----|-------------|-------------|-------------|
| C  | 1.76382100  | -2.44891200 | -0.95740600 |
| C  | 1.58172000  | -2.95958600 | 0.36852600  |
| C  | 3.94281600  | -3.39967300 | -0.92217200 |
| C  | 3.73761400  | -3.86416800 | 0.38439300  |
| H  | 1.47871600  | -1.22026700 | -0.90198500 |
| C  | -4.82293400 | -1.90298400 | 1.89940400  |
| C  | -4.13939100 | -1.41015200 | 0.76557400  |
| C  | -3.42468700 | -0.18894000 | 0.89611700  |
| C  | -3.40445700 | 0.46358600  | 2.15256200  |
| C  | -4.06267200 | -0.04607600 | 3.27869700  |
| C  | -4.77712200 | -1.23913800 | 3.13505400  |
| H  | -5.38757900 | -2.83484100 | 1.80112400  |
| H  | -4.02833400 | 0.50380800  | 4.22273400  |
| H  | -5.31377000 | -1.65432500 | 3.99377000  |
| O  | -2.71661500 | 1.64210100  | 2.27069000  |
| C  | -2.37775000 | 2.22007300  | 0.99635500  |
| P  | -2.41501100 | 0.79646500  | -0.27913100 |
| C  | -3.45245300 | 1.44227500  | -1.73905900 |
| C  | -3.43069900 | 0.41044200  | -2.88380200 |
| H  | -3.95508500 | 0.84675400  | -3.75330700 |
| H  | -3.94242400 | -0.52559500 | -2.61450100 |
| H  | -2.39934000 | 0.16857300  | -3.18875400 |
| C  | -4.89888800 | 1.69743000  | -1.27333600 |
| H  | -5.47395700 | 2.10483700  | -2.12417300 |
| H  | -4.96188600 | 2.43433700  | -0.45372400 |
| H  | -5.39444000 | 0.76980600  | -0.94374700 |
| C  | -2.80432400 | 2.75441500  | -2.23024000 |
| H  | -1.76535500 | 2.60044500  | -2.56816000 |
| H  | -2.80272300 | 3.54954600  | -1.46701500 |
| H  | -3.38465900 | 3.12042300  | -3.09608500 |
| Ir | -0.21969100 | 0.08378000  | -0.66756000 |
| H  | 1.27806900  | 0.11449600  | -1.37106200 |
| H  | -0.28106600 | 1.10184400  | -1.88029500 |
| H  | -0.67137000 | -0.97308000 | -1.83173800 |
| H  | -3.15247000 | 2.96894100  | 0.74014000  |
| H  | 0.94228500  | -2.69342300 | -1.65368500 |
| C  | -4.24362100 | -2.19221900 | -0.49821500 |
| C  | -5.51894400 | -2.50045300 | -1.02143600 |
| C  | -3.10119200 | -2.68964000 | -1.15791300 |
| C  | -5.64500000 | -3.26572800 | -2.18818200 |
| H  | -6.41282400 | -2.12057400 | -0.51510300 |
| C  | -3.23047200 | -3.46288900 | -2.31948600 |
| H  | -2.10981500 | -2.46307100 | -0.75688200 |
| C  | -4.50060800 | -3.74959700 | -2.84060900 |
| H  | -6.63987600 | -3.48443300 | -2.58861100 |
| H  | -2.33438300 | -3.84411600 | -2.82034900 |
| H  | -4.59955400 | -4.35036000 | -3.75000500 |
| O  | 2.54990500  | -3.55101000 | 1.07984900  |
| O  | 3.00556700  | -2.62961100 | -1.59135400 |
| C  | 5.13085200  | -3.72488500 | -1.57919000 |
| H  | 5.28254600  | -3.36640100 | -2.60126900 |
| C  | 4.68645000  | -4.63631900 | 1.04920100  |
| H  | 4.47918400  | -4.97529800 | 2.06796200  |
| C  | 5.88453500  | -4.95546000 | 0.38791800  |

|   |             |             |             |    |             |             |             |
|---|-------------|-------------|-------------|----|-------------|-------------|-------------|
| H | 6.64009700  | -5.55704700 | 0.89944600  | C  | -5.89171600 | 0.69572600  | -1.81128900 |
| C | 6.10154100  | -4.49928400 | -0.91844200 | C  | -4.77803000 | 0.94958000  | -0.98478600 |
| H | 7.03283600  | -4.74258600 | -1.43739900 | C  | -3.98893500 | -0.15604000 | -0.56907000 |
| C | -1.04099000 | 2.94130100  | 1.15764200  | C  | -4.33825500 | -1.45313700 | -1.01303900 |
| H | -0.97043000 | 3.29747000  | 2.20375000  | C  | -5.43216200 | -1.69420000 | -1.85313200 |
| P | 0.49921800  | 1.89440400  | 0.72489600  | C  | -6.20802800 | -0.60072600 | -2.24505000 |
| C | 1.39891300  | 1.63827400  | 2.39200500  | H  | -6.50519000 | 1.54307100  | -2.13062600 |
| C | 0.38594600  | 0.99144900  | 3.36031400  | H  | -5.66201100 | -2.71577400 | -2.16615500 |
| H | 0.91229500  | 0.72062400  | 4.29405300  | H  | -7.07371800 | -0.75847500 | -2.89548400 |
| H | -0.44027500 | 1.66942600  | 3.62992100  | O  | -3.57576500 | -2.52044200 | -0.60818400 |
| H | -0.05483900 | 0.07320800  | 2.93649900  | C  | -2.67429200 | -2.19032700 | 0.45940000  |
| C | 2.56797500  | 0.66076700  | 2.15347400  | P  | -2.52318400 | -0.28781500 | 0.52113100  |
| H | 3.05569900  | 0.44094700  | 3.12102600  | C  | -2.97891800 | 0.20223900  | 2.31698900  |
| H | 2.21347600  | -0.29467300 | 1.72909800  | C  | -2.72269700 | 1.70961600  | 2.50785600  |
| H | 3.33076500  | 1.07579200  | 1.47721300  | H  | -2.95860500 | 1.97382300  | 3.55519500  |
| C | 1.91731400  | 2.96658400  | 2.96723400  | H  | -3.35247300 | 2.33052500  | 1.85242000  |
| H | 2.38709300  | 2.77700900  | 3.94995600  | H  | -1.66736500 | 1.96697800  | 2.31799900  |
| H | 2.67458900  | 3.42766800  | 2.31306500  | C  | -4.45493900 | -0.13470300 | 2.59165400  |
| H | 1.10883100  | 3.70170400  | 3.12578800  | H  | -4.67778600 | 0.09611400  | 3.64951300  |
| C | 1.19766100  | 3.36490700  | -0.13875100 | H  | -4.68459400 | -1.20286500 | 2.43357400  |
| C | 2.47303900  | 3.63102400  | -0.69971700 | H  | -5.13593100 | 0.46112900  | 1.96311800  |
| C | 0.19161200  | 4.35209400  | -0.24280000 | C  | -2.04792000 | -0.59848100 | 3.25006100  |
| C | 2.68709300  | 4.88048300  | -1.31825600 | H  | -0.98784600 | -0.44187100 | 2.99040200  |
| C | 0.40064900  | 5.58308900  | -0.87474500 | H  | -2.24799500 | -1.68249100 | 3.23344200  |
| C | 1.66586300  | 5.83702700  | -1.41218400 | H  | -2.20691100 | -0.24796000 | 4.28650300  |
| H | 3.67344200  | 5.08975200  | -1.74234700 | Ir | -0.43987900 | 0.36152600  | -0.31186500 |
| H | -0.40984200 | 6.31494200  | -0.92183900 | H  | 0.65704400  | 0.77534600  | -1.50139400 |
| H | 1.86108000  | 6.79356500  | -1.90638000 | H  | -0.89524200 | 1.92246800  | -0.16167500 |
| O | -1.04814300 | 4.08606300  | 0.28956300  | H  | -3.12057300 | -2.54886100 | 1.40647300  |
| C | 3.62058700  | 2.67522300  | -0.65277700 | H  | 0.95742700  | 3.07974300  | 0.27357900  |
| C | 4.74901900  | 2.97112100  | 0.14152800  | C  | -4.52172500 | 2.36337900  | -0.58473000 |
| C | 3.63817800  | 1.51194500  | -1.44824300 | C  | -5.50237900 | 3.06860800  | 0.14696500  |
| C | 5.84644000  | 2.09887700  | 0.17712200  | C  | -3.35430000 | 3.04170000  | -0.98856400 |
| H | 4.75884300  | 3.89021600  | 0.73742300  | C  | -5.30374700 | 4.41173100  | 0.49487500  |
| C | 4.73697700  | 0.64105900  | -1.41387900 | H  | -6.42087200 | 2.55318100  | 0.44844900  |
| H | 2.79764600  | 1.30985100  | -2.11903900 | C  | -3.16351600 | 4.38822400  | -0.64832200 |
| C | 5.83857600  | 0.92630300  | -0.59342800 | H  | -2.60131600 | 2.51288100  | -1.57825500 |
| H | 6.71081900  | 2.33944500  | 0.80428900  | C  | -4.13177000 | 5.07443800  | 0.09966700  |
| H | 4.73410400  | -0.25582200 | -2.04185200 | H  | -6.06898900 | 4.94262900  | 1.06999400  |
| H | 6.69653400  | 0.24689200  | -0.56817700 | H  | -2.25853300 | 4.90659700  | -0.98240700 |
| C | 0.37974500  | -2.59138000 | 1.11866200  | H  | -3.98058800 | 6.12602300  | 0.36320000  |
| O | -0.25167800 | -1.53115000 | 0.89024500  | O  | 3.92331700  | 1.98923300  | 1.22194300  |
| O | 0.07219700  | -3.42727600 | 2.10974400  | O  | 2.61121400  | 3.32913800  | -0.93982100 |
| C | -1.05507800 | -3.04984200 | 2.94715600  | C  | 4.68392900  | 4.37536600  | -1.51623900 |
| H | -1.94873300 | -2.86922700 | 2.33008300  | H  | 4.16244000  | 4.87560500  | -2.33699400 |
| H | -1.20214400 | -3.90599100 | 3.61665000  | C  | 5.97863000  | 3.06050400  | 0.61324700  |
| H | -0.81045300 | -2.14279200 | 3.52121200  | H  | 6.44852900  | 2.53425200  | 1.44860300  |

### R=CO<sub>2</sub>Me, face B, lowest energy TS

Zero-point correction= 0.792777 (Hartree/Particle)  
Thermal correction to Energy= 0.845211  
Thermal correction to Enthalpy= 0.846156  
Thermal correction to Gibbs Free Energy= 0.706072  
Sum of electronic and zero-point Energies= -2940.309698  
Sum of electronic and thermal Energies= -2940.257264  
Sum of electronic and thermal Enthalpies= -2940.256319  
Sum of electronic and thermal Free Energies= -2940.396403  
Electronic energy -2941.93321561

|   |            |            |             |
|---|------------|------------|-------------|
| C | 1.89534900 | 2.57052600 | -0.00304700 |
| C | 2.59198700 | 1.95919500 | 1.08109200  |
| C | 3.96306600 | 3.51456400 | -0.68747900 |
| C | 4.62185800 | 2.86930200 | 0.36854300  |
| H | 1.28074800 | 1.59951400 | -0.59389400 |

|    |             |             |             |
|----|-------------|-------------|-------------|
| C  | -5.89171600 | 0.69572600  | -1.81128900 |
| C  | -4.77803000 | 0.94958000  | -0.98478600 |
| C  | -3.98893500 | -0.15604000 | -0.56907000 |
| C  | -4.33825500 | -1.45313700 | -1.01303900 |
| C  | -5.43216200 | -1.69420000 | -1.85313200 |
| C  | -6.20802800 | -0.60072600 | -2.24505000 |
| H  | -6.50519000 | 1.54307100  | -2.13062600 |
| H  | -5.66201100 | -2.71577400 | -2.16615500 |
| H  | -7.07371800 | -0.75847500 | -2.89548400 |
| O  | -3.57576500 | -2.52044200 | -0.60818400 |
| C  | -2.67429200 | -2.19032700 | 0.45940000  |
| P  | -2.52318400 | -0.28781500 | 0.52113100  |
| C  | -2.97891800 | 0.20223900  | 2.31698900  |
| C  | -2.72269700 | 1.70961600  | 2.50785600  |
| H  | -2.95860500 | 1.97382300  | 3.55519500  |
| H  | -3.35247300 | 2.33052500  | 1.85242000  |
| H  | -1.66736500 | 1.96697800  | 2.31799900  |
| C  | -4.45493900 | -0.13470300 | 2.59165400  |
| H  | -4.67778600 | 0.09611400  | 3.64951300  |
| H  | -4.68459400 | -1.20286500 | 2.43357400  |
| H  | -5.13593100 | 0.46112900  | 1.96311800  |
| C  | -2.04792000 | -0.59848100 | 3.25006100  |
| H  | -0.98784600 | -0.44187100 | 2.99040200  |
| H  | -2.24799500 | -1.68249100 | 3.23344200  |
| H  | -2.20691100 | -0.24796000 | 4.28650300  |
| Ir | -0.43987900 | 0.36152600  | -0.31186500 |
| H  | 0.65704400  | 0.77534600  | -1.50139400 |
| H  | -0.89524200 | 1.92246800  | -0.16167500 |
| H  | -3.12057300 | -2.54886100 | 1.40647300  |
| H  | 0.95742700  | 3.07974300  | 0.27357900  |
| C  | -4.52172500 | 2.36337900  | -0.58473000 |
| C  | -5.50237900 | 3.06860800  | 0.14696500  |
| C  | -3.35430000 | 3.04170000  | -0.98856400 |
| C  | -5.30374700 | 4.41173100  | 0.49487500  |
| H  | -6.42087200 | 2.55318100  | 0.44844900  |
| C  | -3.16351600 | 4.38822400  | -0.64832200 |
| H  | -2.60131600 | 2.51288100  | -1.57825500 |
| C  | -4.13177000 | 5.07443800  | 0.09966700  |
| H  | -6.06898900 | 4.94262900  | 1.06999400  |
| H  | -2.25853300 | 4.90659700  | -0.98240700 |
| H  | -3.98058800 | 6.12602300  | 0.36320000  |
| O  | 3.92331700  | 1.98923300  | 1.22194300  |
| O  | 2.61121400  | 3.32913800  | -0.93982100 |
| C  | 4.68392900  | 4.37536600  | -1.51623900 |
| H  | 4.16244000  | 4.87560500  | -2.33699400 |
| C  | 5.97863000  | 3.06050400  | 0.61324700  |
| H  | 6.44852900  | 2.53425200  | 1.44860300  |
| C  | 6.70427200  | 3.92349000  | -0.22606200 |
| H  | 7.77141900  | 4.07848900  | -0.04804500 |
| C  | 6.05725400  | 4.57425800  | -1.28383200 |
| H  | 6.61766300  | 5.24328800  | -1.94270700 |
| C  | -1.36297700 | -2.94424100 | 0.24592300  |
| H  | -1.58516500 | -3.86447800 | -0.32827800 |
| P  | 0.04954700  | -1.96967200 | -0.60484400 |
| C  | 0.15277800  | -2.75448800 | -2.34539000 |
| C  | -1.24591600 | -2.60789400 | -2.98282700 |
| H  | -2.02657700 | -3.17730500 | -2.45310500 |
| H  | -1.56323200 | -1.55153900 | -3.03160300 |
| H  | -1.19931800 | -2.99002300 | -4.01840500 |
| C  | 1.16611900  | -1.97741200 | -3.20812800 |
| H  | 1.11034400  | -2.36128400 | -4.24314700 |
| H  | 0.93309000  | -0.89918600 | -3.23589700 |
| H  | 2.20109900  | -2.10405600 | -2.85785800 |
| C  | 0.56118700  | -4.23566000 | -2.25749200 |
| H  | 0.57134100  | -4.66440000 | -3.27611100 |
| H  | 1.56994800  | -4.35729600 | -1.82975400 |

|   |             |             |             |
|---|-------------|-------------|-------------|
| H | -0.14124400 | -4.83934200 | -1.65706800 |
| C | 1.23464700  | -2.78288600 | 0.55530500  |
| C | 2.65301200  | -2.83862600 | 0.60572800  |
| C | 0.49286100  | -3.39757900 | 1.59105700  |
| C | 3.25601900  | -3.52578700 | 1.68514500  |
| C | 1.09550600  | -4.06534300 | 2.66461400  |
| C | 2.49316800  | -4.12391100 | 2.69735800  |
| H | 4.34799500  | -3.56854000 | 1.73189100  |
| H | 0.47349700  | -4.53859400 | 3.42885400  |
| H | 2.99403800  | -4.64627800 | 3.51834800  |
| O | -0.87639800 | -3.32869500 | 1.54583000  |
| C | 3.55099800  | -2.22687600 | -0.41186100 |
| C | 4.63693200  | -2.96591500 | -0.93186100 |
| C | 3.37925000  | -0.89665300 | -0.84454300 |
| C | 5.51650300  | -2.39052500 | -1.85795400 |
| H | 4.77615100  | -4.00636300 | -0.62030100 |
| C | 4.26243600  | -0.31718100 | -1.76508500 |
| H | 2.52970800  | -0.32294200 | -0.46198100 |
| C | 5.33501200  | -1.06315400 | -2.27527300 |
| H | 6.34402500  | -2.98388800 | -2.25930500 |
| H | 4.10969800  | 0.71706800  | -2.09152700 |
| H | 6.02308200  | -0.61457400 | -2.99843700 |
| H | -1.24696300 | 0.43149000  | -1.66808400 |
| C | 1.88511100  | 1.00494800  | 1.94161900  |
| O | 0.82768700  | 0.43007200  | 1.58977900  |
| O | 2.52358500  | 0.74600100  | 3.08155600  |
| C | 1.98335500  | -0.31844200 | 3.90856300  |
| H | 1.94553000  | -1.26080800 | 3.34078600  |
| H | 2.68007600  | -0.39475800 | 4.75236800  |
| H | 0.97614400  | -0.04712500 | 4.26064200  |
